# Supplementary material for: Discovery of eQTL Alleles Associated with Autism Spectrum Disorder: A Case–Control Study
Source: J Autism Dev Disord. 2022 Jun 23;53(9):3595–612. doi: 10.1007/s10803-022-05631-x (PMC10465380; doi:10.1007/s10803-022-05631-x)
Supplement: Supplementary file 2 — Supplementary file2 (XLSX 3900 kb) [file 10803_2022_5631_MOESM2_ESM.xlsx]

## Sheet: Overview
Supplemental Tables
Discovery of eQTL Alleles Associated with Autism Spectrum Disorder: A Case-Control Study

## Sheet: SupplTable1. SPARK-GTEx results
Supplemental Table 1. SPARK-GTEx Experimental Results.
Variant ID	Ref Alleles SPARK	Alt Alleles SPARK	Ref Alleles GTEx	Alt Alleles GTEx	Odds Ratio	pvalue	Rank	Critical Value	Sig Check	SPARK Homozygous Reference	SPARK Heterozygous	SPARK Homozygous Alternate	SPARK No Call	GTEx Homozygous Reference	GTEx Heterozygous	GTEx Homozygous Alternate	GTEx No Call
chr11_207359_C_CGGCCACAGCCGCCTCAGACGT_b38	698	0	143	575	inf	3.76444e-260	1	7.81922e-07	sig	349	0	0	11	16	111	232	1
chr17_19015197_A_ACGGTACGGGGGTGGGGGC_b38	690	0	131	537	inf	1.07214e-252	2	1.56384e-06	sig	345	0	0	15	10	111	213	26
chr15_75358681_C_CCCACATGCTGCCCAGCCCATA_b38	696	6	174	542	361.333	1.06666e-224	3	2.34577e-06	sig	347	2	2	9	15	144	199	2
chr11_67494811_C_CGA_b38	436	220	5	679	269.131	2.48374e-175	4	3.12769e-06	sig	161	114	53	32	0	5	337	18
chr9_87919241_T_TTCTTGTCTCCCAGCGTCA_b38	716	2	352	362	368.17	7.44204e-133	5	3.90961e-06	sig	358	0	1	1	91	170	96	3
chr1_205065724_A_ATGGCCTGCTGCACTGGTCAGGGCCGGTGGTC_b38	703	1	382	334	614.665	8.15854e-120	6	4.69153e-06	sig	351	1	0	8	105	172	81	2
chr20_49568145_G_GCGGGGCTGGCGGGGCTGA_b38	685	1	417	275	451.739	1.41086e-95	7	5.47345e-06	sig	342	1	0	17	127	163	56	14
chr7_4861834_G_GCACGTCCCCCACCACCGCGACCTT_b38	699	1	443	275	433.916	8.17174e-94	8	6.25538e-06	sig	349	1	0	10	138	167	54	1
chr11_71538079_A_AGGCTGTGGCTCCGGCTGTGGG_b38	714	6	408	256	74.6667	9.46439e-86	9	7.0373e-06	sig	356	2	2	0	122	164	46	28
chr6_30920003_C_CTGGGGCGGTGCAGGTGA_b38	641	63	324	394	12.3728	8.62694e-83	10	7.81922e-06	sig	310	21	21	8	70	184	105	1
chr5_6714741_T_TGGTCCTGGCCGGCGCCCGC_b38	666	0	485	187	inf	3.99834e-63	11	8.60114e-06	sig	333	0	0	27	178	129	29	24
chr1_155235878_G_T_b38	162	486	4	704	58.6667	2.96232e-51	12	9.38306e-06	sig	0	162	162	36	0	4	350	6
chr6_3003476_C_T_b38	651	5	555	163	38.2389	2.9368e-43	13	1.0165e-05	sig	323	5	0	32	205	145	9	1
chr16_55832988_T_C_b38	654	0	594	116	inf	1.26037e-35	14	1.09469e-05	sig	327	0	0	33	248	98	9	5
chr1_152709204_C_CAGCTCTGGGGGCTGCTGT_b38	428	292	199	517	3.80801	3.89178e-34	15	1.17288e-05	sig	199	30	131	0	31	137	190	2
chr18_12254563_C_CCCGCGCACACACCCAT_b38	586	134	380	340	3.9128	2.61067e-31	16	1.25108e-05	sig	272	42	46	0	99	182	79	0
chr19_57859906_G_T_b38	607	109	701	15	0.119161	3.03154e-20	17	1.32927e-05	sig	249	109	0	2	343	15	0	2
chr2_112542424_TTCCGGCGTGTACCGAGAGACTGGCG_T_b38	720	0	661	59	inf	1.00513e-18	18	1.40746e-05	sig	360	0	0	0	303	55	2	0
chr19_54336886_A_G_b38	630	86	688	12	0.127772	1.08018e-15	19	1.48565e-05	sig	272	86	0	2	338	12	0	10
chr7_102554519_G_A_b38	562	144	623	45	0.281902	6.88496e-14	20	1.56384e-05	sig	209	144	0	7	289	45	0	26
chr12_10420495_C_G_b38	393	323	241	427	2.15576	2.06495e-12	21	1.64204e-05	sig	36	321	1	2	40	161	133	26
chr12_50352116_G_C_b38	720	0	650	36	inf	3.72005e-12	22	1.72023e-05	sig	360	0	0	0	307	36	0	17
chr6_31394993_C_T_b38	528	120	459	237	2.2719	1.05441e-10	23	1.79842e-05	sig	223	82	19	36	145	169	34	12
chr11_22193357_G_C_b38	234	450	138	582	2.19304	1.77065e-10	24	1.87661e-05	sig	11	212	119	18	11	116	233	0
chr19_12577507_AAATGTTCCTGGTGAGAGAAGCG_A_b38	637	69	563	153	2.50884	1.48474e-09	25	1.9548e-05	sig	296	45	12	7	219	125	14	2
chr17_7219921_T_TGGGCGTGCAGGACGC_b38	379	341	272	442	1.80609	3.35169e-08	26	2.033e-05	sig	128	123	109	0	51	170	136	3
chr17_50096356_A_G_b38	405	243	547	173	0.527118	7.83178e-08	27	2.11119e-05	sig	126	153	45	36	203	141	16	0
chr7_72942052_G_A_b38	720	0	664	22	inf	1.16783e-07	28	2.18938e-05	sig	360	0	0	0	321	22	0	17
chr20_1915454_C_T_b38	489	165	445	275	1.83146	2.51618e-07	29	2.26757e-05	sig	191	107	29	33	134	177	49	0
chr17_50097544_C_T_b38	436	252	546	174	0.551369	4.18703e-07	30	2.34577e-05	sig	139	158	47	16	203	140	17	0
chr22_49923336_T_TCTGCACTCCGGGGC_b38	599	57	591	129	2.29379	5.39497e-07	31	2.42396e-05	sig	276	47	5	32	245	101	14	0
chr2_112501339_C_T_b38	470	182	421	277	1.69912	5.43808e-06	32	2.50215e-05	sig	172	126	28	34	119	183	47	11
chrX_149933788_A_G_b38	703	3	676	24	8.31953	2.18326e-05	33	2.58034e-05	sig	351	1	1	7	328	20	2	10
chr16_74391723_CCCTCTTCCACCCTCT_C_b38	670	48	623	97	2.17329	2.26438e-05	34	2.65853e-05	sig	312	46	1	1	265	93	2	0
chr2_95895658_A_G_b38	668	2	680	22	10.8059	3.45318e-05	35	2.73673e-05	not_sig	333	2	0	25	329	22	0	9
chr1_160750284_C_T_b38	652	66	602	118	1.93637	5.18515e-05	36	2.81492e-05	not_sig	296	60	3	1	254	94	12	0
chr19_4332108_A_T_b38	425	249	523	191	0.623335	5.23668e-05	37	2.89311e-05	not_sig	129	167	41	23	191	141	25	3
chrX_48898097_G_A_b38	641	65	677	27	0.393296	5.35372e-05	38	2.9713e-05	not_sig	303	35	15	7	329	19	4	8
chrX_135051967_T_A_b38	200	516	132	570	1.67371	5.75627e-05	39	3.0495e-05	not_sig	65	70	223	2	35	62	254	9
chr17_75904826_C_T_b38	685	1	694	18	17.7666	7.24667e-05	40	3.12769e-05	not_sig	342	1	0	17	338	18	0	4
chr10_87000460_A_G_b38	499	185	589	131	0.599908	7.32554e-05	41	3.20588e-05	not_sig	184	131	27	18	243	103	14	0
chr17_50106107_G_A_b38	533	183	466	254	1.58754	7.40431e-05	42	3.28407e-05	not_sig	195	143	20	2	163	140	57	0
chr17_50106924_G_A_b38	176	500	257	463	0.634148	0.000103701	43	3.36226e-05	not_sig	19	138	181	22	57	143	160	0
chr16_1241074_T_C_b38	400	266	356	360	1.52066	0.000122871	44	3.44046e-05	not_sig	125	150	58	27	84	188	86	2
chr14_104883549_C_T_b38	212	498	284	434	0.650546	0.000125122	45	3.51865e-05	not_sig	33	146	176	5	50	184	125	1
chr5_141194530_T_G_b38	641	59	564	100	1.92631	0.000139541	46	3.59684e-05	not_sig	309	23	18	10	238	88	6	28
chr3_50378211_A_C_b38	672	18	718	2	0.103993	0.000155773	47	3.67503e-05	not_sig	330	12	3	15	358	2	0	0
chr17_50095415_A_C_b38	187	529	255	465	0.644612	0.000158156	48	3.75323e-05	not_sig	21	145	192	2	58	139	163	0
chr14_104877981_G_A_b38	256	430	340	380	0.66539	0.000193723	49	3.83142e-05	not_sig	46	164	133	17	78	184	98	0
chr7_102380580_T_C_b38	672	16	666	44	2.77477	0.000325671	50	3.90961e-05	not_sig	328	16	0	16	312	42	1	5
chr17_81119342_C_CCGCGTGCCCTACCTCT_b38	169	549	115	605	1.61947	0.00034071	51	3.9878e-05	not_sig	58	53	248	1	7	101	252	0
chr3_50326340_G_A_b38	695	17	718	2	0.113878	0.000348032	52	4.06599e-05	not_sig	342	11	3	4	358	2	0	0
chr5_141194596_CAGGCCG_C_b38	521	171	448	226	1.53699	0.000348202	53	4.14419e-05	not_sig	226	69	51	14	151	146	40	23
chr10_100267650_C_T_b38	347	331	437	283	0.678901	0.000371769	54	4.22238e-05	not_sig	91	165	83	21	137	163	60	0
chr1_1668542_C_T_b38	591	121	542	176	1.58604	0.000537213	55	4.30057e-05	not_sig	242	107	7	4	198	146	15	1
chr20_35434398_T_C_b38	44	676	17	703	2.69161	0.000560414	56	4.37876e-05	not_sig	0	44	316	0	0	17	343	0
chr20_63276630_C_T_b38	666	30	656	64	2.16585	0.000582529	57	4.45696e-05	not_sig	320	26	2	12	297	62	1	0
chr16_31077026_G_A_b38	414	306	478	242	0.684962	0.00062155	58	4.53515e-05	not_sig	112	190	58	0	158	162	40	0
chr14_104882883_T_G_b38	218	490	284	436	0.683012	0.000715195	59	4.61334e-05	not_sig	38	142	174	6	51	182	127	0
chr16_29798352_ATTTC_A_b38	598	72	565	117	1.71991	0.000725915	60	4.69153e-05	not_sig	268	62	5	25	234	97	10	19
chr22_19137870_A_C_b38	500	220	438	282	1.46326	0.000735	61	4.76972e-05	not_sig	174	152	34	0	138	162	60	0
chr19_1394467_G_GTGC_b38	688	32	708	10	0.303672	0.00079318	62	4.84792e-05	not_sig	329	30	1	0	349	10	0	1
chr12_122204614_C_G_b38	530	150	504	216	1.51429	0.000808212	63	4.92611e-05	not_sig	204	122	14	20	171	162	27	0
chr10_73249349_T_A_b38	609	57	690	30	0.464531	0.000826824	64	5.0043e-05	not_sig	277	55	1	27	330	30	0	0
chr17_19533874_T_C_b38	432	280	489	217	0.684663	0.000830976	65	5.08249e-05	not_sig	138	156	62	4	172	145	36	7
chr1_12938878_C_G_b38	644	72	574	110	1.71409	0.000831067	66	5.16068e-05	not_sig	286	72	0	2	232	110	0	18
chr2_178718671_T_C_b38	576	144	622	96	0.617363	0.00086483	67	5.23888e-05	not_sig	228	120	12	0	271	80	8	1
chr19_47067086_G_A_b38	684	34	708	12	0.340977	0.000894463	68	5.31707e-05	not_sig	326	32	1	1	348	12	0	0
chr13_32402471_A_G_b38	625	61	611	105	1.76075	0.000908513	69	5.39526e-05	not_sig	288	49	6	17	261	89	8	2
chr2_130339674_G_A_b38	544	176	596	124	0.643075	0.000915729	70	5.47345e-05	not_sig	206	132	22	0	248	100	12	0
chr1_161218797_G_A_b38	667	15	679	41	2.68503	0.000918086	71	5.55165e-05	not_sig	326	15	0	19	320	39	1	0
chr15_94340879_G_C_b38	352	352	419	293	0.699284	0.000933493	72	5.62984e-05	not_sig	93	166	93	8	125	169	62	4
chr17_81671775_C_T_b38	561	153	613	105	0.628059	0.000942863	73	5.70803e-05	not_sig	220	121	16	3	261	91	7	1
chr7_149082526_G_A_b38	273	399	229	487	1.45507	0.000966339	74	5.78622e-05	not_sig	51	171	114	24	33	163	162	2
chr19_40608159_G_T_b38	586	122	545	175	1.54234	0.00109768	75	5.86441e-05	not_sig	241	104	9	6	206	133	21	0
chr22_25326283_C_CAG_b38	249	413	211	509	1.4544	0.00112738	76	5.94261e-05	not_sig	48	153	130	29	33	145	182	0
chr9_35906522_G_A_b38	541	119	504	172	1.55149	0.00114554	77	6.0208e-05	not_sig	226	89	15	30	181	142	15	22
chr17_81670337_C_G_b38	524	196	577	143	0.662576	0.00121874	78	6.09899e-05	not_sig	193	138	29	0	230	117	13	0
chr5_140677950_G_A_b38	610	68	679	39	0.515247	0.00126002	79	6.17718e-05	not_sig	274	62	3	21	321	37	1	1
chr5_53109547_C_CCGGGGG_b38	476	232	402	282	1.43927	0.00126446	80	6.25538e-05	not_sig	150	176	28	6	118	166	58	18
chr19_40611963_A_G_b38	456	264	395	325	1.42117	0.00129116	81	6.33357e-05	not_sig	142	172	46	0	106	183	71	0
chrX_102749389_A_G_b38	715	5	693	21	4.33333	0.0013225	82	6.41176e-05	not_sig	357	1	2	0	342	9	6	3
chr2_130342923_G_A_b38	548	172	598	122	0.649996	0.00133258	83	6.48995e-05	not_sig	209	130	21	0	249	100	11	0
chr12_6551053_C_T_b38	460	198	558	162	0.674487	0.00141602	84	6.56814e-05	not_sig	157	146	26	31	221	116	23	0
chr12_56324638_T_C_b38	687	33	656	64	2.03104	0.00149334	85	6.64634e-05	not_sig	327	33	0	0	300	56	4	0
chr17_81667744_A_T_b38	565	153	613	107	0.644585	0.0016046	86	6.72453e-05	not_sig	222	121	16	1	260	93	7	0
chr2_178802363_C_T_b38	287	415	354	364	0.711102	0.00164402	87	6.80272e-05	not_sig	55	177	119	9	93	168	98	1
chr1_229342020_A_G_b38	605	59	585	99	1.73533	0.00166838	88	6.88091e-05	not_sig	274	57	1	28	250	85	7	18
chr17_50110182_G_C_b38	543	123	631	89	0.622666	0.00169582	89	6.95911e-05	not_sig	219	105	9	27	275	81	4	0
chr12_48970608_G_A_b38	313	349	402	318	0.709447	0.00176801	90	7.0373e-05	not_sig	71	171	89	29	107	188	65	0
chr12_6551059_T_C_b38	453	199	555	165	0.676762	0.00177163	91	7.11549e-05	not_sig	153	147	26	34	219	117	24	0
chrX_153772646_G_C_b38	533	127	609	91	0.627116	0.00187372	92	7.19368e-05	not_sig	242	49	39	30	287	35	28	10
chr1_19326378_G_A_b38	698	22	672	48	2.26623	0.00198495	93	7.27187e-05	not_sig	338	22	0	0	313	46	1	0
chr2_112913833_A_G_b38	181	533	236	484	0.696442	0.00205676	94	7.35007e-05	not_sig	22	137	198	3	43	150	167	0
chr11_113695485_C_A_b38	418	234	518	202	0.696598	0.00208069	95	7.42826e-05	not_sig	131	156	39	34	188	142	30	0
chr15_90266401_G_A_b38	41	677	18	702	2.36189	0.00214952	96	7.50645e-05	not_sig	0	41	318	1	0	18	342	0
chr12_14771094_A_G_b38	502	188	574	146	0.679183	0.0021498	97	7.58464e-05	not_sig	186	130	29	15	232	110	18	0
chr16_30668665_T_TGGGGGG_b38	716	2	702	14	7.1396	0.00220726	98	7.66284e-05	not_sig	357	2	0	1	344	14	0	2
chr10_73235328_C_T_b38	664	56	692	28	0.479769	0.00222368	99	7.74103e-05	not_sig	305	54	1	0	332	28	0	0
chr16_89686659_GGGCCGTCCGCGTCTGCGCCTGCGCGCAAGAGA_G_b38	688	18	678	42	2.36775	0.00222583	100	7.81922e-05	not_sig	337	14	2	7	319	40	1	0
chr20_21303598_T_C_b38	658	60	623	97	1.70749	0.00225516	101	7.89741e-05	not_sig	303	52	4	1	270	83	7	0
chr4_158680524_C_T_b38	133	573	93	627	1.56488	0.0023092	102	7.9756e-05	not_sig	19	95	239	7	5	83	272	0
chr10_73348388_T_G_b38	612	62	684	36	0.519525	0.00231026	103	8.0538e-05	not_sig	278	56	3	23	324	36	0	0
chrX_154400814_G_A_b38	663	57	615	91	1.7211	0.00231134	104	8.13199e-05	not_sig	305	53	2	0	283	49	21	7
chr17_50110106_G_A_b38	555	125	630	90	0.634286	0.00235942	105	8.21018e-05	not_sig	224	107	9	20	274	82	4	0
chr22_19122251_A_G_b38	411	239	389	317	1.40137	0.00238977	106	8.28837e-05	not_sig	131	149	45	35	115	159	79	7
chr3_28241610_G_A_b38	716	4	700	18	4.60286	0.00239283	107	8.36657e-05	not_sig	356	4	0	0	341	18	0	1
chr3_50274469_C_T_b38	703	17	717	3	0.173025	0.00241316	108	8.44476e-05	not_sig	346	11	3	0	357	3	0	0
chr19_18446225_A_AGCAGGCCACTAG_b38	482	210	443	273	1.41445	0.00241512	109	8.52295e-05	not_sig	168	146	32	14	132	179	47	2
chr17_18790964_G_A_b38	91	629	130	576	0.641017	0.0026893	110	8.60114e-05	not_sig	4	83	273	0	15	100	238	7
chr1_161595591_A_G_b38	607	63	599	103	1.65676	0.00285331	111	8.67933e-05	not_sig	276	55	4	25	258	83	10	9
chr13_75804601_A_T_b38	433	245	514	206	0.708314	0.00290597	112	8.75753e-05	not_sig	137	159	43	21	185	144	31	0
chr10_121974495_CGCTGCA_C_b38	492	228	437	283	1.39745	0.00292072	113	8.83572e-05	not_sig	162	168	30	0	131	175	54	0
chr6_98926524_G_A_b38	668	52	634	86	1.74254	0.00301911	114	8.91391e-05	not_sig	311	46	3	0	279	76	5	0
chr11_3088173_A_G_b38	182	532	235	485	0.706047	0.00302305	115	8.9921e-05	not_sig	30	122	205	3	33	169	158	0
chr12_56360038_C_A_b38	686	34	657	63	1.93473	0.0030641	116	9.07029e-05	not_sig	326	34	0	0	301	55	4	0
chr11_3088178_C_T_b38	183	531	236	484	0.706789	0.00306512	117	9.14849e-05	not_sig	30	123	204	3	33	170	157	0
chr16_31110472_G_A_b38	426	288	484	236	0.721247	0.00307477	118	9.22668e-05	not_sig	118	190	49	3	162	160	38	0
chr8_144392334_T_TGGGGGTGCAAGGTGA_b38	390	330	333	387	1.37346	0.00314902	119	9.30487e-05	not_sig	139	112	109	0	84	165	111	0
chr15_68317309_G_T_b38	627	33	705	15	0.404255	0.00320812	120	9.38306e-05	not_sig	299	29	2	30	345	15	0	0
chr12_113094812_A_G_b38	637	83	596	122	1.571	0.00323879	121	9.46126e-05	not_sig	282	73	5	0	247	102	10	1
chr19_49851175_C_G_b38	716	4	665	17	4.57594	0.00336805	122	9.53945e-05	not_sig	356	4	0	0	324	17	0	19
chr12_57154683_C_T_b38	643	23	712	8	0.314118	0.00338071	123	9.61764e-05	not_sig	310	23	0	27	352	8	0	0
chr19_18427932_A_C_b38	490	230	436	284	1.38771	0.00353492	124	9.69583e-05	not_sig	166	158	36	0	129	178	53	0
chr12_89525853_ACC_A_b38	562	158	471	191	1.44242	0.00355998	125	9.77402e-05	not_sig	220	122	18	0	168	135	28	29
chr10_45000878_T_G_b38	601	47	694	26	0.479061	0.00358555	126	9.85222e-05	not_sig	278	45	1	36	335	24	1	0
chr20_1769344_A_G_b38	689	13	718	2	0.147632	0.0036131	127	9.93041e-05	not_sig	339	11	1	9	358	2	0	0
chr9_65737984_G_C_b38	329	375	274	428	1.37043	0.00363584	128	0.000100086	not_sig	58	213	81	8	55	164	132	9
chr10_75095568_A_G_b38	496	220	548	172	0.707631	0.00372092	129	0.000100868	not_sig	171	154	33	2	209	130	21	0
chr15_43640503_A_G_b38	692	0	709	9	inf	0.00385438	130	0.00010165	not_sig	346	0	0	14	350	9	0	1
chr19_45406745_G_T_b38	539	149	608	112	0.666372	0.00390655	131	0.000102432	not_sig	206	127	11	16	255	98	7	0
chr1_160681128_AC_A_b38	687	33	707	13	0.382795	0.00392868	132	0.000103214	not_sig	328	31	1	0	347	13	0	0
chr14_23959985_T_C_b38	681	17	700	4	0.228908	0.00393713	133	0.000103996	not_sig	332	17	0	11	348	4	0	8
chr2_130144621_C_T_b38	485	225	439	281	1.37975	0.0040237	134	0.000104778	not_sig	159	167	29	5	138	163	59	0
chr10_73650294_G_A_b38	280	406	240	480	1.37931	0.00405026	135	0.000105559	not_sig	60	160	123	17	33	174	153	0
chr8_143560774_G_A_b38	702	18	702	4	0.222222	0.00410045	136	0.000106341	not_sig	342	18	0	0	349	4	0	7
chr16_1379650_C_T_b38	664	56	586	84	1.69966	0.00418588	137	0.000107123	not_sig	307	50	3	0	258	70	7	25
chr17_7403968_T_C_b38	116	604	78	642	1.58074	0.0042038	138	0.000107905	not_sig	10	96	254	0	6	66	288	0
chr6_33167615_A_G_b38	144	546	198	522	0.695305	0.00421905	139	0.000108687	not_sig	17	110	218	15	22	154	184	0
chr14_31109556_C_T_b38	571	107	644	76	0.629767	0.00423151	140	0.000109469	not_sig	245	81	13	21	286	72	2	0
chr19_54250956_G_T_b38	580	94	529	131	1.52797	0.00432017	141	0.000110251	not_sig	245	90	2	23	215	99	16	30
chrX_153952914_C_A_b38	539	129	614	96	0.653284	0.0043885	142	0.000111033	not_sig	243	53	38	26	289	36	30	5
chr12_56086690_C_A_b38	671	31	661	59	1.93202	0.0043948	143	0.000111815	not_sig	320	31	0	9	301	59	0	0
chr1_154567992_C_T_b38	643	77	668	46	0.575045	0.00455086	144	0.000112597	not_sig	286	71	3	0	313	42	2	3
chr17_7817913_T_C_b38	511	209	559	161	0.704188	0.00455168	145	0.000113379	not_sig	182	147	31	0	212	135	13	0
chr15_40873541_A_C_b38	149	549	201	519	0.700786	0.00457688	146	0.000114161	not_sig	10	129	210	11	23	155	182	0
chr16_67290924_A_G_b38	628	76	671	47	0.57879	0.00460387	147	0.000114943	not_sig	282	64	6	8	315	41	3	1
chr6_33173384_A_G_b38	151	569	198	522	0.699633	0.00463018	148	0.000115724	not_sig	18	115	227	0	22	154	184	0
chr9_66908658_T_C_b38	155	517	121	593	1.4693	0.00469375	149	0.000116506	not_sig	25	105	206	24	8	105	244	3
chr16_88857069_T_C_b38	711	7	697	23	3.35171	0.00477998	150	0.000117288	not_sig	352	7	0	1	337	23	0	0
chr16_88864955_A_AGGGAG_b38	459	229	426	292	1.37389	0.00482719	151	0.00011807	not_sig	164	131	49	16	125	176	58	1
chr1_175128213_C_T_b38	229	467	289	431	0.731304	0.00490526	152	0.000118852	not_sig	42	145	161	12	54	181	125	0
chr11_65132799_G_T_b38	569	151	611	109	0.672234	0.00490584	153	0.000119634	not_sig	226	117	17	0	256	99	5	0
chrX_71303426_A_T_b38	629	79	647	47	0.578385	0.00492978	154	0.000120416	not_sig	295	39	20	6	313	21	13	13
chr13_75871180_C_T_b38	359	349	311	409	1.35279	0.00493717	155	0.000121198	not_sig	82	195	77	6	70	171	119	0
chr14_64227477_C_T_b38	318	362	283	437	1.35648	0.00499618	156	0.00012198	not_sig	80	158	102	20	56	171	133	0
chr20_32839678_TTTTG_T_b38	592	128	631	89	0.652338	0.00503936	157	0.000122762	not_sig	248	96	16	0	276	79	5	0
chr22_21630090_G_A_b38	498	166	585	135	0.692308	0.00506183	158	0.000123544	not_sig	183	132	17	28	236	113	11	0
chr8_125056644_T_C_b38	539	181	584	136	0.693484	0.00508539	159	0.000124326	not_sig	206	127	27	0	234	116	10	0
chr15_89804689_G_A_b38	588	66	677	43	0.565865	0.0050911	160	0.000125108	not_sig	263	62	2	33	320	37	3	0
chr1_236538853_G_A_b38	246	410	218	502	1.38165	0.00514208	161	0.000125889	not_sig	46	154	128	32	30	158	172	0
chr11_8683981_C_G_b38	663	57	629	89	1.6458	0.00517383	162	0.000126671	not_sig	305	53	2	0	276	77	6	1
chr13_98453141_G_A_b38	535	183	488	232	1.38986	0.00520507	163	0.000127453	not_sig	205	125	29	1	168	152	40	0
chr16_31120293_A_G_b38	289	431	237	483	1.36653	0.00522849	164	0.000128235	not_sig	50	189	121	0	38	161	161	0
chr16_74391401_C_T_b38	658	62	623	95	1.61834	0.00523294	165	0.000129017	not_sig	299	60	1	0	265	93	1	1
chr1_149055986_G_C_b38	341	355	392	302	0.740026	0.00525071	166	0.000129799	not_sig	83	175	90	12	93	206	48	13
chr22_30538829_T_C_b38	205	513	159	561	1.40995	0.00525232	167	0.000130581	not_sig	23	159	177	1	16	127	217	0
chr11_62666701_G_A_b38	535	185	486	234	1.39239	0.00532192	168	0.000131363	not_sig	202	131	27	0	160	166	34	0
chr21_33230000_C_A_b38	515	203	427	233	1.38433	0.0053936	169	0.000132145	not_sig	182	151	26	1	139	149	42	30
chr17_10328181_A_C_b38	95	577	143	577	0.664336	0.00539425	170	0.000132927	not_sig	5	85	246	24	17	109	234	0
chr6_31980644_TCTC_T_b38	605	109	646	74	0.635811	0.00550181	171	0.000133709	not_sig	256	93	8	3	289	68	3	0
chr14_91416785_G_A_b38	547	149	520	200	1.41198	0.00554334	172	0.000134491	not_sig	215	117	16	12	186	148	26	0
chr12_12786617_T_G_b38	362	328	324	396	1.34892	0.00557593	173	0.000135272	not_sig	89	184	72	15	68	188	104	0
chr16_4343375_A_C_b38	644	68	617	103	1.58099	0.00561361	174	0.000136054	not_sig	293	58	5	4	266	85	9	0
chr19_13904898_C_A_b38	505	185	571	147	0.70275	0.00569679	175	0.000136836	not_sig	181	143	21	15	225	121	13	1
chr19_4328863_T_C_b38	309	395	367	349	0.743911	0.00574044	176	0.000137618	not_sig	58	193	101	8	93	181	84	2
chr12_56254127_G_C_b38	38	682	66	654	0.552119	0.00575511	177	0.0001384	not_sig	0	38	322	0	5	56	299	0
chr7_106030821_T_C_b38	656	14	717	3	0.196055	0.00576316	178	0.000139182	not_sig	321	14	0	25	357	3	0	0
chr12_7124640_T_A_b38	436	232	417	303	1.36554	0.00576657	179	0.000139964	not_sig	135	166	33	26	120	177	63	0
chr17_81833916_G_A_b38	517	145	605	115	0.677743	0.00579064	180	0.000140746	not_sig	201	115	15	29	253	99	8	0
chr5_142771377_T_C_b38	628	86	665	55	0.603952	0.00584629	181	0.000141528	not_sig	279	70	8	3	306	53	1	0
chr5_177608963_T_C_b38	302	418	355	365	0.74284	0.00591833	182	0.00014231	not_sig	60	182	118	0	90	175	95	0
chr6_110476510_C_CCACCCCT_b38	47	639	76	602	0.582613	0.00594846	183	0.000143092	not_sig	1	45	297	17	7	62	270	21
chr7_37907562_G_T_b38	432	282	486	234	0.737589	0.00596814	184	0.000143874	not_sig	129	174	54	3	171	144	45	0
chr11_65794786_G_A_b38	492	186	568	152	0.70786	0.00598993	185	0.000144656	not_sig	167	158	14	21	224	120	16	0
chr16_31130672_C_T_b38	435	285	486	234	0.734893	0.00603764	186	0.000145437	not_sig	123	189	48	0	164	158	38	0
chr11_308314_T_C_b38	406	314	458	262	0.73966	0.00605895	187	0.000146219	not_sig	114	178	68	0	151	156	53	0
chr16_67284339_A_G_b38	627	93	660	60	0.612903	0.00606289	188	0.000147001	not_sig	274	79	7	0	304	52	4	0
chr6_160531784_T_C_b38	698	18	715	5	0.271173	0.00608169	189	0.000147783	not_sig	340	18	0	2	355	5	0	0
chr3_14132646_T_C_b38	374	320	440	280	0.74375	0.00610625	190	0.000148565	not_sig	112	150	85	13	137	166	57	0
chr1_23383982_C_T_b38	333	387	386	334	0.744548	0.00611264	191	0.000149347	not_sig	71	191	98	0	106	174	80	0
chr17_50354963_G_C_b38	528	178	582	138	0.703348	0.00614003	192	0.000150129	not_sig	194	140	19	7	234	114	12	0
chr10_133423692_C_T_b38	216	498	248	416	0.727555	0.00615577	193	0.000150911	not_sig	39	138	180	3	37	174	121	28
chr2_241668068_G_T_b38	379	269	473	247	0.735737	0.00623147	194	0.000151693	not_sig	109	161	54	36	154	165	41	0
chr11_64789660_C_T_b38	670	50	694	26	0.502017	0.00636662	195	0.000152475	not_sig	313	44	3	0	336	22	2	0
chr19_32692410_A_G_b38	630	90	591	127	1.50423	0.00638981	196	0.000153257	not_sig	277	76	7	0	245	101	13	1
chr2_241666621_G_C_b38	423	297	474	246	0.739164	0.00652961	197	0.000154039	not_sig	123	177	60	0	154	166	40	0
chr12_120993469_T_A_b38	560	150	522	196	1.40179	0.00661804	198	0.000154821	not_sig	218	124	13	5	190	142	27	1
chr19_49114449_T_C_b38	412	290	450	234	0.738759	0.00666433	199	0.000155602	not_sig	122	168	61	9	149	152	41	18
chr15_34342123_C_G_b38	461	227	432	288	1.35389	0.00670258	200	0.000156384	not_sig	151	159	34	16	137	158	65	0
chrX_154438830_T_C_b38	619	79	592	116	1.53532	0.00682969	201	0.000157166	not_sig	291	37	21	11	271	50	33	6
chr21_36146408_G_A_b38	441	279	491	229	0.737205	0.00685747	202	0.000157948	not_sig	137	167	56	0	166	159	35	0
chr17_7394133_A_G_b38	115	599	80	640	1.53589	0.00689976	203	0.00015873	not_sig	10	95	252	3	6	68	286	0
chr7_42911916_G_A_b38	186	534	142	574	1.40798	0.00690937	204	0.000159512	not_sig	32	122	206	0	21	100	237	2
chr1_944307_T_C_b38	55	665	30	690	1.90226	0.00696667	205	0.000160294	not_sig	0	55	305	0	0	30	330	0
chr10_99613972_C_T_b38	528	164	592	128	0.696111	0.00698928	206	0.000161076	not_sig	198	132	16	14	241	110	9	0
chr11_62690803_T_C_b38	573	143	533	187	1.40583	0.00703158	207	0.000161858	not_sig	230	113	15	2	194	145	21	0
chr15_85744679_C_T_b38	437	241	513	207	0.731674	0.00703543	208	0.00016264	not_sig	136	165	38	21	182	149	29	0
chr15_101295101_G_C_b38	706	12	718	2	0.163881	0.00706129	209	0.000163422	not_sig	348	10	1	1	358	2	0	0
chr19_39532668_A_G_b38	181	539	227	491	0.726349	0.00710558	210	0.000164204	not_sig	29	123	208	0	38	151	170	1
chr9_137188619_C_T_b38	717	3	704	14	4.75284	0.0071471	211	0.000164986	not_sig	357	3	0	0	345	14	0	1
chr11_64340263_G_A_b38	457	263	506	214	0.734892	0.00716708	212	0.000165767	not_sig	142	173	45	0	179	148	33	0
chr18_45953254_C_A_b38	619	63	679	39	0.564345	0.00727635	213	0.000166549	not_sig	281	57	3	19	321	37	1	1
chr6_42883658_G_A_b38	477	175	572	148	0.705255	0.00739542	214	0.000167331	not_sig	174	129	23	34	222	128	10	0
chr9_127935750_G_C_b38	110	606	76	644	1.53813	0.00745623	215	0.000168113	not_sig	7	96	255	2	5	66	289	0
chr11_64341067_C_T_b38	519	201	471	249	1.36505	0.00750215	216	0.000168895	not_sig	190	139	31	0	153	165	42	0
chr6_36919532_G_A_b38	527	191	572	148	0.713909	0.00752999	217	0.000169677	not_sig	190	147	22	1	230	112	18	0
chr11_74085872_C_T_b38	453	249	513	207	0.734094	0.00754208	218	0.000170459	not_sig	145	163	43	9	177	159	24	0
chr1_944296_G_A_b38	56	664	31	689	1.87447	0.00762024	219	0.000171241	not_sig	0	56	304	0	0	31	329	0
chr3_49722937_G_T_b38	720	0	712	8	inf	0.00766128	220	0.000172023	not_sig	360	0	0	0	352	8	0	0
chr6_31785749_G_A_b38	641	43	697	23	0.491909	0.00769438	221	0.000172805	not_sig	299	43	0	18	337	23	0	0
chr1_150552402_G_A_b38	655	29	707	13	0.415305	0.00769926	222	0.000173587	not_sig	314	27	1	18	347	13	0	0
chr11_71796159_C_T_b38	679	41	675	19	0.466161	0.00782033	223	0.000174369	not_sig	319	41	0	0	328	19	0	13
chr21_46550668_G_A_b38	529	159	595	125	0.698959	0.00785009	224	0.000175151	not_sig	200	129	15	16	249	97	14	0
chr16_66579622_G_A_b38	669	51	639	81	1.6628	0.00788691	225	0.000175932	not_sig	310	49	1	0	279	81	0	0
chr17_76688516_C_T_b38	162	558	121	599	1.43722	0.00791283	226	0.000176714	not_sig	13	136	211	0	10	101	249	0
chr14_105488368_C_T_b38	556	150	523	197	1.3962	0.00792353	227	0.000177496	not_sig	213	130	10	7	188	147	25	0
chrX_154428737_G_A_b38	658	62	616	92	1.58504	0.00812624	228	0.000178278	not_sig	312	34	14	0	286	44	24	6
chr5_7883075_G_A_b38	577	119	633	87	0.666414	0.00826606	229	0.00017906	not_sig	241	95	12	12	278	77	5	0
chr5_177504705_G_C_b38	338	382	389	331	0.75289	0.00838245	230	0.000179842	not_sig	80	178	102	0	104	181	75	0
chr10_73802403_C_A_b38	319	401	269	451	1.33374	0.00858692	231	0.000180624	not_sig	73	173	114	0	42	185	133	0
chr5_7878079_T_C_b38	619	101	652	68	0.639191	0.00863765	232	0.000181406	not_sig	265	89	6	0	293	66	1	0
chr22_45289121_A_G_b38	360	334	424	296	0.752457	0.00872883	233	0.000182188	not_sig	77	206	64	13	127	170	63	0
chr4_186171864_G_T_b38	338	352	302	418	1.32906	0.00874159	234	0.00018297	not_sig	83	172	90	15	66	170	124	0
chr16_67255938_C_T_b38	618	52	689	31	0.534721	0.00882095	235	0.000183752	not_sig	286	46	3	25	331	27	2	0
chr11_64284975_C_T_b38	425	293	475	245	0.748159	0.00887831	236	0.000184534	not_sig	125	175	59	1	154	167	39	0
chr5_141184004_C_T_b38	538	180	572	136	0.710645	0.00888281	237	0.000185316	not_sig	202	134	23	1	232	108	14	6
chr19_54095339_T_G_b38	650	44	696	24	0.509404	0.00890549	238	0.000186097	not_sig	303	44	0	13	336	24	0	0
chr5_141152011_C_T_b38	520	190	569	149	0.716677	0.00893855	239	0.000186879	not_sig	188	144	23	5	227	115	17	1
chr11_17559452_C_T_b38	447	251	506	210	0.739099	0.0090227	240	0.000187661	not_sig	151	145	53	11	179	148	31	2
chr10_12250287_C_G_b38	314	346	291	427	1.33164	0.00911527	241	0.000188443	not_sig	66	182	82	30	62	167	130	1
chr8_42187436_G_A_b38	289	425	341	379	0.755777	0.00914323	242	0.000189225	not_sig	53	183	121	3	86	169	105	0
chr2_131491799_C_T_b38	35	621	65	655	0.567943	0.00919434	243	0.000190007	not_sig	2	31	295	32	4	57	299	0
chr8_38238144_C_T_b38	581	139	538	180	1.39846	0.00923893	244	0.000190789	not_sig	232	117	11	0	205	128	26	1
chr1_944858_A_G_b38	52	610	32	688	1.83279	0.00930978	245	0.000191571	not_sig	0	52	279	29	0	32	328	0
chr19_14061916_C_T_b38	410	304	462	258	0.753161	0.00943264	246	0.000192353	not_sig	125	160	72	3	151	160	49	0
chr16_31066088_A_G_b38	130	590	171	549	0.707404	0.00945922	247	0.000193135	not_sig	15	100	245	0	22	127	211	0
chr1_1288005_G_C_b38	664	28	708	12	0.401937	0.00946055	248	0.000193917	not_sig	321	22	3	14	348	12	0	0
chr20_46014194_A_C_b38	305	415	256	462	1.32634	0.00949363	249	0.000194699	not_sig	70	165	125	0	45	166	148	1
chr3_191358113_C_T_b38	445	257	502	216	0.745035	0.00960938	250	0.00019548	not_sig	146	153	52	9	175	152	32	1
chr19_18124614_T_C_b38	24	692	46	674	0.508168	0.00962991	251	0.000196262	not_sig	1	22	335	2	0	46	314	0
chr8_22566731_T_C_b38	607	113	568	152	1.43749	0.00967288	252	0.000197044	not_sig	256	95	9	0	223	122	15	0
chr1_959193_G_A_b38	91	629	60	660	1.59141	0.00968278	253	0.000197826	not_sig	1	89	270	0	4	52	304	0
chr6_42961020_T_G_b38	265	441	318	400	0.755858	0.0097446	254	0.000198608	not_sig	54	157	142	7	71	176	112	1
chr19_719322_C_T_b38	327	393	377	343	0.757021	0.00976575	255	0.00019939	not_sig	76	175	109	0	91	195	74	0
chr9_1057294_C_A_b38	621	91	659	61	0.631676	0.00988036	256	0.000200172	not_sig	271	79	6	4	303	53	4	0
chr11_65170212_C_T_b38	557	163	597	123	0.704042	0.00991275	257	0.000200954	not_sig	217	123	20	0	246	105	9	0
chr1_962358_C_T_b38	656	64	682	38	0.571114	0.00992771	258	0.000201736	not_sig	297	62	1	0	324	34	2	0
chr11_117390772_C_G_b38	576	144	614	106	0.690554	0.00995079	259	0.000202518	not_sig	230	116	14	0	265	84	11	0
chr11_64285685_T_G_b38	427	293	466	240	0.75056	0.0100654	260	0.0002033	not_sig	126	175	59	0	152	162	39	7
chr10_91828451_G_A_b38	249	435	306	402	0.751995	0.0100827	261	0.000204082	not_sig	50	149	143	18	66	174	114	6
chr1_155192003_C_T_b38	688	32	633	53	1.80016	0.0101146	262	0.000204864	not_sig	328	32	0	0	292	49	2	17
chr11_64341646_T_G_b38	432	288	480	240	0.75	0.0101324	263	0.000205645	not_sig	129	174	57	0	157	166	37	0
chr21_46325219_C_G_b38	99	619	136	584	0.686781	0.0101567	264	0.000206427	not_sig	6	87	266	1	13	110	237	0
chr20_38346542_C_T_b38	670	38	656	64	1.72015	0.0101896	265	0.000207209	not_sig	318	34	2	6	300	56	4	0
chr12_6445263_G_C_b38	575	145	533	187	1.39128	0.0102457	266	0.000207991	not_sig	234	107	19	0	195	143	22	0
chr9_34637693_T_G_b38	548	134	616	104	0.690444	0.0103674	267	0.000208773	not_sig	218	112	11	19	262	92	6	0
chr16_67282331_C_T_b38	645	75	673	47	0.600594	0.0103676	268	0.000209555	not_sig	291	63	6	0	316	41	3	0
chr19_17847968_T_C_b38	645	75	671	47	0.602385	0.0103725	269	0.000210337	not_sig	288	69	3	0	313	45	1	1
chr16_67288215_G_C_b38	691	29	708	12	0.403857	0.0103776	270	0.000211119	not_sig	334	23	3	0	348	12	0	0
chr20_46010872_C_T_b38	328	392	279	439	1.31658	0.0104318	271	0.000211901	not_sig	80	168	112	0	54	171	134	1
chr17_75020526_C_T_b38	489	231	534	186	0.737341	0.0105299	272	0.000212683	not_sig	166	157	37	0	197	140	23	0
chr6_34059161_C_T_b38	64	654	39	681	1.70877	0.0105682	273	0.000213465	not_sig	4	56	299	1	0	39	321	0
chr1_961945_G_C_b38	65	655	39	681	1.73282	0.0106221	274	0.000214247	not_sig	1	63	296	0	2	35	323	0
chr19_57390180_G_T_b38	528	144	605	115	0.69697	0.0106845	275	0.000215029	not_sig	205	118	13	24	255	95	10	0
chr22_37066886_G_A_b38	469	251	421	299	1.32705	0.0107662	276	0.00021581	not_sig	154	161	45	0	118	185	57	0
chr20_63682701_A_G_b38	626	46	642	78	1.65339	0.0107974	277	0.000216592	not_sig	291	44	1	24	287	68	5	0
chr14_24266418_A_G_b38	516	204	559	161	0.728507	0.0108898	278	0.000217374	not_sig	187	142	31	0	222	115	23	0
chr17_32931639_G_A_b38	650	28	707	13	0.426854	0.0109669	279	0.000218156	not_sig	311	28	0	21	347	13	0	0
chr7_102496096_T_G_b38	651	63	622	94	1.56163	0.0109885	280	0.000218938	not_sig	294	63	0	3	264	94	0	2
chr5_131672501_T_C_b38	56	664	32	688	1.81325	0.0110212	281	0.00021972	not_sig	4	48	308	0	2	28	330	0
chr16_31459219_T_C_b38	237	481	193	527	1.34542	0.0112419	282	0.000220502	not_sig	35	167	157	1	24	145	191	0
chr1_5986372_C_G_b38	405	281	473	247	0.752635	0.0112495	283	0.000221284	not_sig	113	179	51	17	158	157	45	0
chr5_141956109_C_G_b38	704	16	716	4	0.24581	0.0112593	284	0.000222066	not_sig	344	16	0	0	356	4	0	0
chr14_64214130_A_G_b38	369	349	321	399	1.31422	0.0112627	285	0.000222848	not_sig	101	167	91	1	72	177	111	0
chr9_98060802_T_C_b38	336	382	386	334	0.761088	0.0113285	286	0.00022363	not_sig	72	192	95	1	104	178	78	0
chr17_74612695_G_A_b38	519	193	480	240	1.34456	0.0113312	287	0.000224412	not_sig	187	145	24	4	166	148	46	0
chr9_114424397_A_G_b38	152	566	194	526	0.728134	0.0113987	288	0.000225194	not_sig	15	122	222	1	23	148	189	0
chr5_31422900_T_C_b38	522	168	585	135	0.717033	0.011412	289	0.000225975	not_sig	204	114	27	15	241	103	16	0
chrX_153444780_A_G_b38	710	10	711	1	0.0998594	0.0114336	290	0.000226757	not_sig	354	2	4	0	355	1	0	4
chr6_32043867_A_G_b38	625	95	654	64	0.643811	0.0114727	291	0.000227539	not_sig	271	83	6	0	298	58	3	1
chr1_154572175_G_T_b38	622	76	670	50	0.610762	0.0114811	292	0.000228321	not_sig	276	70	3	11	312	46	2	0
chr11_124896232_A_G_b38	461	259	505	213	0.75074	0.0115154	293	0.000229103	not_sig	148	165	47	0	180	145	34	1
chr21_41742040_T_C_b38	304	364	377	343	0.759845	0.0115642	294	0.000229885	not_sig	65	174	95	26	89	199	72	0
chr19_9757602_T_C_b38	598	122	558	160	1.40549	0.0115897	295	0.000230667	not_sig	253	92	15	0	219	120	20	1
chr19_9757728_C_T_b38	598	122	558	160	1.40549	0.0115897	296	0.000231449	not_sig	253	92	15	0	219	120	20	1
chr19_871033_G_A_b38	661	59	631	89	1.58019	0.0116429	297	0.000232231	not_sig	302	57	1	0	277	77	6	0
chr12_8942386_A_G_b38	687	33	705	15	0.44294	0.0118091	298	0.000233013	not_sig	328	31	1	0	345	15	0	0
chr8_144415027_G_A_b38	676	44	697	23	0.506978	0.0118142	299	0.000233795	not_sig	316	44	0	0	339	19	2	0
chr17_74248902_C_T_b38	676	44	697	23	0.506978	0.0118142	300	0.000234577	not_sig	316	44	0	0	337	23	0	0
chrX_154776309_C_T_b38	639	47	687	27	0.534331	0.0118253	301	0.000235359	not_sig	310	19	14	17	337	13	7	3
chr21_46261213_T_C_b38	217	499	264	456	0.751139	0.0118444	302	0.00023614	not_sig	41	135	182	2	50	164	146	0
chr11_64343211_G_C_b38	432	288	479	241	0.754697	0.0118859	303	0.000236922	not_sig	129	174	57	0	156	167	37	0
chr6_98926884_A_T_b38	664	36	702	18	0.472934	0.0118871	304	0.000237704	not_sig	315	34	1	10	342	18	0	0
chr3_183965336_G_A_b38	663	57	687	33	0.558722	0.0119065	305	0.000238486	not_sig	305	53	2	0	327	33	0	0
chr11_64343196_G_A_b38	432	288	477	241	0.757862	0.0119202	306	0.000239268	not_sig	129	174	57	0	155	167	37	1
chrX_48577014_T_C_b38	514	204	459	243	1.33391	0.0120142	307	0.00024005	not_sig	216	82	61	1	186	87	78	9
chr6_32041147_G_A_b38	683	7	693	21	2.95671	0.012038	308	0.000240832	not_sig	338	7	0	15	336	21	0	3
chr1_155047234_A_C_b38	414	290	470	250	0.759354	0.0120641	309	0.000241614	not_sig	117	180	55	8	155	160	45	0
chr1_151781636_T_C_b38	303	389	363	355	0.761754	0.0121378	310	0.000242396	not_sig	62	179	105	14	92	179	88	1
chr1_151615803_T_A_b38	13	705	3	717	4.40709	0.0121681	311	0.000243178	not_sig	0	13	346	1	0	3	357	0
chr4_93829637_C_A_b38	717	3	705	13	4.40709	0.0121681	312	0.00024396	not_sig	357	3	0	0	346	13	0	1
chr2_26477380_C_T_b38	668	50	642	78	1.62318	0.0121682	313	0.000244742	not_sig	310	48	1	1	284	74	2	0
chr17_80138078_T_C_b38	395	299	361	359	1.31375	0.0121761	314	0.000245523	not_sig	118	159	70	13	89	183	88	0
chr11_1226857_G_A_b38	717	3	706	14	4.73938	0.0122258	315	0.000246305	not_sig	357	3	0	0	346	14	0	0
chr21_42090327_A_C_b38	555	163	595	125	0.715317	0.0122648	316	0.000247087	not_sig	212	131	16	1	241	113	6	0
chr21_46272884_C_T_b38	420	268	486	234	0.754561	0.0122759	317	0.000247869	not_sig	137	146	61	16	159	168	33	0
chr1_1402457_A_G_b38	551	163	594	126	0.717048	0.0123982	318	0.000248651	not_sig	211	129	17	3	243	108	9	0
chr17_81845225_A_G_b38	537	151	600	120	0.711258	0.0124096	319	0.000249433	not_sig	210	117	17	16	249	102	9	0
chr17_75878575_C_G_b38	596	92	575	129	1.45338	0.0125829	320	0.000250215	not_sig	259	78	7	16	233	109	10	8
chr7_29146640_A_G_b38	419	301	466	254	0.758744	0.0127164	321	0.000250997	not_sig	127	165	68	0	148	170	42	0
chr6_31411338_G_A_b38	486	216	542	178	0.73893	0.0127632	322	0.000251779	not_sig	175	136	40	9	203	136	21	0
chrX_153783936_A_G_b38	564	156	595	117	0.710924	0.0127643	323	0.000252561	not_sig	255	54	51	0	278	39	39	4
chr11_64256499_G_A_b38	530	190	486	234	1.34308	0.0128658	324	0.000253343	not_sig	198	134	28	0	165	156	39	0
chr1_161198214_C_T_b38	541	177	582	138	0.724736	0.0128793	325	0.000254125	not_sig	202	137	20	1	241	100	19	0
chr19_13926955_C_T_b38	564	156	600	118	0.711026	0.01291	326	0.000254907	not_sig	217	130	13	0	249	102	8	1
chr16_31094233_A_C_b38	502	218	545	175	0.739416	0.0129135	327	0.000255688	not_sig	167	168	25	0	208	129	23	0
chr14_72958973_A_C_b38	502	218	545	175	0.739416	0.0129135	328	0.00025647	not_sig	176	150	34	0	211	123	26	0
chr10_73816205_T_C_b38	219	501	176	544	1.35112	0.0130574	329	0.000257252	not_sig	37	145	178	0	22	132	206	0
chr11_62792029_C_T_b38	579	83	660	60	0.634173	0.0130967	330	0.000258034	not_sig	255	69	7	29	302	56	2	0
chr11_65965329_T_C_b38	352	368	400	320	0.765217	0.0131267	331	0.000258816	not_sig	91	170	99	0	111	178	71	0
chr2_239960810_G_A_b38	582	138	618	102	0.696074	0.013213	332	0.000259598	not_sig	231	120	9	0	262	94	4	0
chr19_40690434_G_A_b38	704	16	679	33	2.13844	0.0132284	333	0.00026038	not_sig	344	16	0	0	324	31	1	4
chr22_17159155_G_A_b38	512	208	436	236	1.33239	0.0133801	334	0.000261162	not_sig	182	148	30	0	149	138	49	24
chr5_141201647_C_A_b38	528	180	572	142	0.728205	0.0134709	335	0.000261944	not_sig	197	134	23	6	229	114	14	3
chr2_24967258_G_A_b38	631	33	703	17	0.462391	0.0134874	336	0.000262726	not_sig	300	31	1	28	343	17	0	0
chr22_40410091_G_GTGTC_b38	581	139	615	103	0.700041	0.0135352	337	0.000263508	not_sig	238	105	17	0	263	89	7	1
chr5_140807352_G_T_b38	434	286	476	238	0.758741	0.0135646	338	0.00026429	not_sig	130	174	56	0	153	170	34	3
chr9_120787749_G_A_b38	166	554	207	511	0.739689	0.0136109	339	0.000265072	not_sig	21	124	215	0	25	157	177	1
chr9_127935764_A_G_b38	106	610	75	645	1.49443	0.013614	340	0.000265853	not_sig	7	92	259	2	5	65	290	0
chr9_123792565_A_G_b38	704	16	686	34	2.18076	0.0136348	341	0.000266635	not_sig	345	14	1	0	328	30	2	0
chr12_10620384_A_G_b38	431	261	494	226	0.755472	0.0137218	342	0.000267417	not_sig	137	157	52	14	172	150	38	0
chr7_48309904_C_T_b38	688	6	720	0	0	0.0138249	343	0.000268199	not_sig	341	6	0	13	360	0	0	0
chr16_66580194_G_C_b38	619	29	703	15	0.455437	0.0139285	344	0.000268981	not_sig	296	27	1	36	344	15	0	1
chr4_153710411_T_C_b38	586	132	549	171	1.38276	0.0139527	345	0.000269763	not_sig	239	108	12	1	212	125	23	0
chr17_82444070_A_G_b38	637	81	665	53	0.626771	0.0140538	346	0.000270545	not_sig	281	75	3	1	309	47	3	1
chr6_151057215_C_G_b38	383	335	431	289	0.76661	0.0143549	347	0.000271327	not_sig	98	187	74	1	131	169	60	0
chr11_3088196_T_C_b38	106	612	142	578	0.705008	0.0144744	348	0.000272109	not_sig	10	86	263	1	16	110	234	0
chr17_8144851_T_C_b38	152	568	115	605	1.40784	0.014541	349	0.000272891	not_sig	19	114	227	0	10	95	255	0
chr22_19122096_A_C_b38	480	234	425	273	1.31765	0.0146174	350	0.000273673	not_sig	163	154	40	3	132	161	56	11
chr7_150803432_C_T_b38	533	187	490	230	1.33788	0.0146263	351	0.000274455	not_sig	191	151	18	0	168	154	38	0
chr2_218403190_A_G_b38	252	466	298	422	0.765792	0.0146656	352	0.000275237	not_sig	41	170	148	1	58	182	120	0
chr22_23159099_T_G_b38	331	373	386	334	0.767853	0.0147319	353	0.000276018	not_sig	77	177	98	8	101	184	75	0
chr10_100193948_A_C_b38	367	311	437	283	0.764206	0.0148305	354	0.0002768	not_sig	104	159	76	21	137	163	60	0
chr18_45917745_A_G_b38	348	372	301	417	1.296	0.0148663	355	0.000277582	not_sig	88	172	100	0	62	177	120	1
chr1_147242631_G_C_b38	408	312	359	357	1.30041	0.0149283	356	0.000278364	not_sig	113	182	65	0	93	173	92	2
chr6_3264253_T_C_b38	164	556	126	594	1.39054	0.014953	357	0.000279146	not_sig	16	132	212	0	9	108	243	0
chr19_13938330_G_C_b38	563	153	603	117	0.713979	0.014954	358	0.000279928	not_sig	218	127	13	2	252	99	9	0
chr9_69820797_C_G_b38	595	101	647	73	0.664682	0.0149684	359	0.00028071	not_sig	251	93	4	12	292	63	5	0
chr14_39308472_G_C_b38	258	422	221	479	1.32511	0.0149833	360	0.000281492	not_sig	40	178	122	20	36	149	165	10
chr10_78033930_C_T_b38	261	437	315	405	0.767898	0.0150475	361	0.000282274	not_sig	47	167	135	11	59	197	104	0
chr15_42161765_T_C_b38	688	16	715	5	0.300699	0.0151147	362	0.000283056	not_sig	336	16	0	8	355	5	0	0
chr11_62598193_G_A_b38	210	450	275	445	0.755152	0.015191	363	0.000283838	not_sig	31	148	151	30	47	181	132	0
chr18_35242388_C_T_b38	555	107	637	83	0.675846	0.0151982	364	0.00028462	not_sig	232	91	8	29	279	79	2	0
chr6_31878964_C_A_b38	606	64	677	43	0.601412	0.0153485	365	0.000285402	not_sig	278	50	7	25	317	43	0	0
chrX_149544977_A_G_b38	240	422	210	490	1.32701	0.0154882	366	0.000286183	not_sig	76	88	167	29	62	86	202	10
chr16_90027761_G_A_b38	593	75	667	53	0.628266	0.0155428	367	0.000286965	not_sig	263	67	4	26	309	49	2	0
chr6_30744028_C_G_b38	41	679	66	654	0.59834	0.0155473	368	0.000287747	not_sig	1	39	320	0	2	62	296	0
chr3_134486603_ACCTT_A_b38	194	496	245	473	0.755118	0.0156977	369	0.000288529	not_sig	27	140	178	15	39	167	153	1
chr17_38466241_C_G_b38	214	506	258	462	0.757331	0.0157326	370	0.000289311	not_sig	30	154	176	0	51	156	153	0
chr19_5784359_C_T_b38	574	146	610	110	0.70896	0.0157342	371	0.000290093	not_sig	232	110	18	0	258	94	8	0
chr20_63248922_A_G_b38	195	455	261	459	0.753695	0.0158701	372	0.000290875	not_sig	25	145	155	35	48	165	147	0
chr19_5771114_G_A_b38	640	24	707	11	0.414899	0.0159742	373	0.000291657	not_sig	308	24	0	28	348	11	0	1
chr19_56160078_C_T_b38	677	39	694	20	0.500259	0.0160267	374	0.000292439	not_sig	320	37	1	2	337	20	0	3
chr19_40577538_C_T_b38	539	181	497	223	1.33616	0.0161198	375	0.000293221	not_sig	204	131	25	0	170	157	33	0
chr9_127928133_G_C_b38	78	642	51	667	1.58897	0.0161642	376	0.000294003	not_sig	4	70	286	0	3	45	311	1
chr17_7929905_T_C_b38	361	337	419	301	0.769537	0.0162583	377	0.000294785	not_sig	93	175	81	11	121	177	62	0
chr13_20512419_T_C_b38	617	45	692	28	0.554785	0.0162719	378	0.000295567	not_sig	286	45	0	29	332	28	0	0
chr12_132710832_T_C_b38	617	101	540	126	1.42541	0.016456	379	0.000296348	not_sig	267	83	9	1	214	112	7	27
chr11_118145353_C_T_b38	292	428	247	473	1.30648	0.0165397	380	0.00029713	not_sig	68	156	136	0	45	157	158	0
chr16_66552856_G_A_b38	631	31	704	16	0.46261	0.0165921	381	0.000297912	not_sig	301	29	1	29	344	16	0	0
chr2_219055690_A_G_b38	222	498	266	454	0.760848	0.0166229	382	0.000298694	not_sig	41	140	179	0	45	176	139	0
chr17_81716967_T_TGCCTCACCCCTG_b38	534	184	494	226	1.32772	0.0166312	383	0.000299476	not_sig	215	104	40	1	168	158	34	0
chr8_23163833_G_A_b38	609	105	645	75	0.674419	0.0166315	384	0.000300258	not_sig	260	89	8	3	287	71	2	0
chr11_120305601_G_A_b38	451	267	496	224	0.762837	0.016763	385	0.00030104	not_sig	143	165	51	1	178	140	42	0
chr12_52316197_C_A_b38	462	192	550	170	0.74375	0.0168079	386	0.000301822	not_sig	164	134	29	33	214	122	24	0
chr22_50571524_C_T_b38	357	353	408	312	0.773371	0.0170263	387	0.000302604	not_sig	85	187	83	5	116	176	68	0
chr14_104946886_A_G_b38	304	416	350	370	0.772527	0.0172001	388	0.000303386	not_sig	65	174	121	0	91	168	101	0
chr2_240014662_G_A_b38	540	128	617	103	0.704265	0.0172288	389	0.000304168	not_sig	214	112	8	26	261	95	4	0
chr1_116536107_A_G_b38	689	19	713	7	0.35602	0.0172746	390	0.00030495	not_sig	336	17	1	6	353	7	0	0
chr17_18798907_T_C_b38	177	541	213	487	0.748041	0.0172958	391	0.000305731	not_sig	22	133	204	1	31	151	168	10
chr11_124880551_CCGGAGT_C_b38	506	214	547	173	0.747817	0.017354	392	0.000306513	not_sig	178	150	32	0	208	131	21	0
chr15_89592201_A_G_b38	79	635	53	667	1.56568	0.0173715	393	0.000307295	not_sig	2	75	280	3	1	51	308	0
chr1_1395346_A_G_b38	558	162	595	125	0.723623	0.0174589	394	0.000308077	not_sig	215	128	17	0	244	107	9	0
chr5_177390142_G_T_b38	512	208	469	251	1.31737	0.0174935	395	0.000308859	not_sig	178	156	26	0	156	157	47	0
chr19_47046196_C_T_b38	561	149	519	187	1.3566	0.0175309	396	0.000309641	not_sig	230	101	24	5	192	135	26	7
chr7_16600733_T_C_b38	174	542	216	504	0.749077	0.0175718	397	0.000310423	not_sig	23	128	207	2	40	136	184	0
chr5_79077608_C_T_b38	260	458	305	415	0.772425	0.0175785	398	0.000311205	not_sig	52	156	151	1	63	179	118	0
chr17_8290155_G_A_b38	174	546	136	584	1.36846	0.0175906	399	0.000311987	not_sig	25	124	211	0	12	112	236	0
chr12_56349583_T_C_b38	652	38	654	64	1.67906	0.017652	400	0.000312769	not_sig	307	38	0	15	299	56	4	1
chr10_73799109_G_A_b38	216	504	175	545	1.33469	0.017721	401	0.000313551	not_sig	35	146	179	0	22	131	207	0
chr15_74461084_T_C_b38	697	21	678	40	1.95814	0.0178344	402	0.000314333	not_sig	338	21	0	1	319	40	0	1
chr6_3264268_G_C_b38	164	556	127	593	1.37727	0.0180523	403	0.000315115	not_sig	16	132	212	0	10	107	243	0
chr19_32826637_C_T_b38	612	108	577	143	1.40439	0.0180678	404	0.000315896	not_sig	263	86	11	0	232	113	15	0
chrX_154353564_A_G_b38	655	65	623	93	1.50426	0.0181205	405	0.000316678	not_sig	308	39	13	0	290	43	25	2
chr15_56427599_G_T_b38	66	640	92	596	0.668071	0.0181541	406	0.00031746	not_sig	2	62	289	7	6	80	258	16
chr16_25228484_G_C_b38	420	282	475	245	0.768197	0.0181942	407	0.000318242	not_sig	120	180	51	9	159	157	44	0
chr11_62612555_C_T_b38	488	162	490	218	1.34019	0.0182369	408	0.000319024	not_sig	184	120	21	35	165	160	29	6
chr14_20357806_A_C_b38	464	218	532	188	0.752156	0.0184069	409	0.000319806	not_sig	157	150	34	19	201	130	29	0
chr1_228280865_A_G_b38	401	287	463	255	0.769523	0.0184337	410	0.000320588	not_sig	124	153	67	16	154	155	50	1
chr9_35107743_C_T_b38	705	15	716	4	0.26257	0.0184467	411	0.00032137	not_sig	346	13	1	0	356	4	0	0
chr1_12011623_A_G_b38	216	454	276	444	0.765371	0.0184511	412	0.000322152	not_sig	31	154	150	25	52	172	136	0
chr2_178493938_A_G_b38	591	125	627	93	0.701282	0.018509	413	0.000322934	not_sig	242	107	9	2	276	75	9	0
chr7_100767944_C_T_b38	571	139	540	178	1.35409	0.0185253	414	0.000323716	not_sig	230	111	14	5	207	126	26	1
chr17_81715620_G_A_b38	594	126	627	93	0.699248	0.0187118	415	0.000324498	not_sig	246	102	12	0	273	81	6	0
chr1_35894068_A_G_b38	697	23	711	9	0.383599	0.0187233	416	0.00032528	not_sig	340	17	3	0	351	9	0	0
chr19_39828587_C_T_b38	599	67	673	47	0.62436	0.0187289	417	0.000326061	not_sig	269	61	3	27	315	43	2	0
chr11_62602409_G_A_b38	488	220	453	267	1.30741	0.0190032	418	0.000326843	not_sig	164	160	30	6	138	177	45	0
chr20_38241720_T_G_b38	456	264	499	221	0.764985	0.0191426	419	0.000327625	not_sig	142	172	46	0	178	143	39	0
chr10_97469637_G_A_b38	527	183	492	226	1.32283	0.0191673	420	0.000328407	not_sig	199	129	27	5	168	156	35	1
chr22_36501380_T_C_b38	622	48	690	30	0.563406	0.0191956	421	0.000329189	not_sig	289	44	2	25	331	28	1	0
chr15_75904155_A_G_b38	685	9	695	23	2.51878	0.0192468	422	0.000329971	not_sig	338	9	0	13	336	23	0	1
chr11_65618735_C_G_b38	498	222	455	265	1.3065	0.0192646	423	0.000330753	not_sig	168	162	30	0	148	159	53	0
chr4_2904980_G_T_b38	547	167	588	132	0.735305	0.0193228	424	0.000331535	not_sig	211	125	21	3	240	108	12	0
chr5_141184513_C_T_b38	539	181	575	143	0.740591	0.0194843	425	0.000332317	not_sig	202	135	23	0	232	111	16	1
chr1_21842693_A_G_b38	690	22	679	41	1.89383	0.0198261	426	0.000333099	not_sig	334	22	0	4	320	39	1	0
chr17_82749052_G_A_b38	227	483	273	447	0.769527	0.019852	427	0.000333881	not_sig	26	175	154	5	60	153	147	0
chr5_140843056_A_G_b38	360	358	402	312	0.780455	0.0198894	428	0.000334663	not_sig	112	136	111	1	127	148	82	3
chr2_239959194_A_AT_b38	582	138	616	104	0.712027	0.0199011	429	0.000335445	not_sig	231	120	9	0	261	94	5	0
chr5_177513273_C_T_b38	406	310	364	356	1.28089	0.0199875	430	0.000336226	not_sig	108	190	60	2	97	170	93	0
chr12_56996254_T_C_b38	662	56	637	83	1.54031	0.0200733	431	0.000337008	not_sig	305	52	2	1	282	73	5	0
chr7_75985239_G_A_b38	588	88	655	65	0.663081	0.0204226	432	0.00033779	not_sig	254	80	4	22	295	65	0	0
chr17_8264282_T_C_b38	214	506	174	546	1.32711	0.0204675	433	0.000338572	not_sig	34	146	180	0	16	142	202	0
chr2_219169108_A_G_b38	232	486	275	445	0.772465	0.0204899	434	0.000339354	not_sig	48	136	175	1	56	163	141	0
chr15_79463231_C_T_b38	689	17	714	6	0.340583	0.0205052	435	0.000340136	not_sig	336	17	0	7	354	6	0	0
chr11_65833442_G_C_b38	580	120	627	91	0.701489	0.0205824	436	0.000340918	not_sig	247	86	17	10	272	83	4	1
chr13_112880670_C_G_b38	584	136	547	173	1.3581	0.0207465	437	0.0003417	not_sig	240	104	16	0	211	125	24	0
chr9_137353692_A_G_b38	694	26	673	45	1.78478	0.0209192	438	0.000342482	not_sig	335	24	1	0	314	45	0	1
chr3_149542293_C_T_b38	711	9	719	1	0.109875	0.0210586	439	0.000343264	not_sig	352	7	1	0	359	1	0	0
chr1_27547334_G_A_b38	719	1	711	9	9.10127	0.0210586	440	0.000344046	not_sig	359	1	0	0	351	9	0	0
chr12_49269803_C_CCTCCTCCCCCTG_b38	719	1	711	9	9.10127	0.0210586	441	0.000344828	not_sig	359	1	0	0	351	9	0	0
chr19_18195014_C_T_b38	480	238	439	281	1.29094	0.0211603	442	0.00034561	not_sig	150	180	29	1	136	167	57	0
chr17_41728331_G_A_b38	174	542	138	580	1.34927	0.0212079	443	0.000346391	not_sig	23	128	207	2	11	116	232	1
chr15_67395482_C_T_b38	695	1	711	9	8.79747	0.0212269	444	0.000347173	not_sig	347	1	0	12	351	9	0	0
chr6_31862816_A_C_b38	628	36	699	21	0.524082	0.0212312	445	0.000347955	not_sig	296	36	0	28	340	19	1	0
chr1_225848608_A_G_b38	245	423	308	412	0.774769	0.0212638	446	0.000348737	not_sig	45	155	134	26	66	176	118	0
chrX_155054116_G_A_b38	426	290	461	243	0.774314	0.0213495	447	0.000349519	not_sig	166	94	98	2	185	91	76	8
chr12_57175695_C_T_b38	682	38	659	61	1.66129	0.021535	448	0.000350301	not_sig	323	36	1	0	303	53	4	0
chr17_41462863_G_A_b38	478	242	435	285	1.2941	0.0215375	449	0.000351083	not_sig	161	156	43	0	132	171	57	0
chr19_13877602_A_G_b38	531	189	569	151	0.745585	0.0216007	450	0.000351865	not_sig	191	149	20	0	222	125	13	0
chr1_963087_C_T_b38	669	51	690	30	0.570332	0.0216452	451	0.000352647	not_sig	309	51	0	0	330	30	0	0
chr6_42857169_G_A_b38	669	51	688	30	0.57199	0.0216506	452	0.000353429	not_sig	311	47	2	0	329	30	0	1
chr17_41727720_C_T_b38	151	543	121	599	1.37663	0.0216564	453	0.000354211	not_sig	21	109	217	13	8	105	247	0
chr6_3264292_C_T_b38	164	556	128	592	1.36421	0.0216887	454	0.000354993	not_sig	16	132	212	0	10	108	242	0
chr9_95111153_G_A_b38	393	327	437	283	0.778305	0.0217997	455	0.000355774	not_sig	105	183	72	0	131	175	54	0
chr19_40718299_G_C_b38	630	84	605	115	1.42562	0.0220193	456	0.000356556	not_sig	278	74	5	3	254	97	9	0
chr11_65616284_G_T_b38	498	222	453	261	1.29246	0.0221222	457	0.000357338	not_sig	168	162	30	0	146	161	50	3
chr15_40340937_A_T_b38	607	71	670	50	0.638007	0.0221403	458	0.00035812	not_sig	271	65	3	21	312	46	2	0
chr17_81672654_G_A_b38	640	26	707	13	0.452617	0.0221565	459	0.000358902	not_sig	307	26	0	27	347	13	0	0
chr19_49118335_G_C_b38	427	291	471	249	0.775735	0.0221582	460	0.000359684	not_sig	130	167	62	1	154	163	43	0
chrX_153765882_A_C_b38	575	145	590	108	0.725891	0.0222115	461	0.000360466	not_sig	259	57	44	0	272	46	31	11
chr1_155033615_A_G_b38	428	292	471	249	0.774889	0.0222512	462	0.000361248	not_sig	124	180	56	0	156	159	45	0
chr6_33080825_C_A_b38	354	354	401	313	0.780549	0.0222859	463	0.00036203	not_sig	91	172	91	6	109	183	65	3
chr17_74541739_G_A_b38	626	92	655	65	0.675241	0.0224814	464	0.000362812	not_sig	275	76	8	1	298	59	3	0
chrX_154354335_G_A_b38	655	65	626	92	1.48095	0.0224814	465	0.000363594	not_sig	308	39	13	0	292	42	25	1
chr21_46265873_T_C_b38	377	343	421	299	0.780614	0.0225901	466	0.000364376	not_sig	110	157	93	0	120	181	59	0
chr1_161215268_G_T_b38	499	207	548	172	0.75662	0.0226699	467	0.000365158	not_sig	179	141	33	7	215	118	27	0
chr21_46266025_A_G_b38	376	344	418	300	0.784466	0.0227071	468	0.000365939	not_sig	109	158	93	0	118	182	59	1
chr2_130202450_T_C_b38	450	256	416	304	1.28456	0.0227601	469	0.000366721	not_sig	142	166	45	7	127	162	71	0
chr8_17232055_T_C_b38	226	434	202	506	1.30442	0.0230431	470	0.000367503	not_sig	42	142	146	30	35	132	187	6
chr6_107721009_G_A_b38	54	666	80	640	0.648649	0.0230489	471	0.000368285	not_sig	3	48	309	0	6	68	286	0
chr17_50189930_G_C_b38	336	380	382	338	0.782364	0.0232071	472	0.000369067	not_sig	74	188	96	2	102	178	80	0
chr6_41771435_C_T_b38	654	66	625	93	1.47447	0.0232391	473	0.000369849	not_sig	296	62	2	0	272	81	6	1
chr11_116779043_T_C_b38	641	23	709	11	0.432391	0.0234065	474	0.000370631	not_sig	309	23	0	28	349	11	0	0
chr20_63743036_C_T_b38	580	116	629	89	0.707472	0.0235296	475	0.000371413	not_sig	244	92	12	12	277	75	7	1
chr2_73602245_C_T_b38	522	196	561	159	0.754829	0.0236335	476	0.000372195	not_sig	198	126	35	1	219	123	18	0
chr7_892323_G_A_b38	696	24	677	43	1.84195	0.0236556	477	0.000372977	not_sig	336	24	0	0	318	41	1	0
chr19_872089_A_G_b38	526	158	512	204	1.32644	0.0238225	478	0.000373759	not_sig	199	128	15	18	179	154	25	2
chr15_45402412_C_T_b38	505	213	545	175	0.761296	0.023952	479	0.000374541	not_sig	174	157	28	1	203	139	18	0
chr15_45402381_C_T_b38	505	213	545	175	0.761296	0.023952	480	0.000375323	not_sig	174	157	28	1	203	139	18	0
chr16_88711587_C_T_b38	376	318	433	287	0.783709	0.0240747	481	0.000376104	not_sig	105	166	76	13	134	165	61	0
chr2_74889400_G_A_b38	689	15	715	5	0.321212	0.0241603	482	0.000376886	not_sig	337	15	0	8	355	5	0	0
chr7_100615131_C_T_b38	592	114	570	150	1.36657	0.0244381	483	0.000377668	not_sig	254	84	15	7	224	122	14	0
chr16_88712423_C_T_b38	382	324	433	287	0.78147	0.0245611	484	0.00037845	not_sig	107	168	78	7	134	165	61	0
chr17_75522122_G_C_b38	256	464	215	505	1.29591	0.0245994	485	0.000379232	not_sig	47	162	151	0	33	149	178	0
chr1_108937356_G_T_b38	485	215	538	182	0.763119	0.0246042	486	0.000380014	not_sig	170	145	35	10	203	132	25	0
chr7_100995773_G_A_b38	408	274	362	312	1.28338	0.0246243	487	0.000380796	not_sig	91	226	24	19	90	182	65	23
chr6_42963523_C_G_b38	277	443	320	400	0.781603	0.0246266	488	0.000381578	not_sig	60	157	143	0	71	178	111	0
chr3_58208324_C_A_b38	444	256	498	222	0.773155	0.0246377	489	0.00038236	not_sig	147	150	53	10	172	154	34	0
chr17_75003966_A_G_b38	432	282	477	243	0.780409	0.0247031	490	0.000383142	not_sig	127	178	52	3	157	163	40	0
chr1_1307327_A_G_b38	82	638	56	664	1.52396	0.0249251	491	0.000383924	not_sig	5	72	283	0	1	54	305	0
chr15_74330192_A_G_b38	638	82	664	56	0.656186	0.0249251	492	0.000384706	not_sig	282	74	4	0	308	48	4	0
chr22_41574905_T_C_b38	639	13	716	4	0.274602	0.0250226	493	0.000385488	not_sig	313	13	0	34	356	4	0	0
chr10_70888579_C_T_b38	583	137	495	157	1.34972	0.0250628	494	0.000386269	not_sig	239	105	16	0	191	113	22	34
chr20_58989640_C_T_b38	658	62	631	89	1.49691	0.0250683	495	0.000387051	not_sig	300	58	2	0	280	71	9	0
chr10_87022327_A_G_b38	424	288	386	334	1.27389	0.0251541	496	0.000387833	not_sig	120	184	52	4	105	176	79	0
chr6_30689238_T_C_b38	40	654	64	656	0.626911	0.0251946	497	0.000388615	not_sig	1	38	308	13	2	60	298	0
chr3_45967298_G_A_b38	431	289	388	332	1.2761	0.0253926	498	0.000389397	not_sig	130	171	59	0	105	178	77	0
chr7_64687243_G_A_b38	703	15	715	5	0.327739	0.0254327	499	0.000390179	not_sig	344	15	0	1	355	5	0	0
chr14_70642436_C_G_b38	118	602	150	564	0.73701	0.0255232	500	0.000390961	not_sig	9	100	251	0	16	118	223	3
chr17_80047238_A_G_b38	569	139	543	177	1.33435	0.0256951	501	0.000391743	not_sig	226	117	11	6	204	135	21	0
chr5_163483193_G_C_b38	561	155	517	189	1.32313	0.025804	502	0.000392525	not_sig	222	117	19	2	191	135	27	7
chr7_23253479_C_A_b38	403	297	457	263	0.780887	0.0259407	503	0.000393307	not_sig	110	183	57	10	144	169	47	0
chr4_5748234_G_C_b38	376	344	419	301	0.785203	0.0259985	504	0.000394089	not_sig	92	192	76	0	124	171	65	0
chr16_67237955_T_C_b38	638	58	682	38	0.612903	0.0260792	505	0.000394871	not_sig	294	50	4	12	324	34	2	0
chr19_4333714_C_T_b38	303	417	346	374	0.78542	0.0260836	506	0.000395653	not_sig	60	183	117	0	86	174	100	0
chr2_241871857_G_A_b38	417	303	374	346	1.2732	0.0260836	507	0.000396434	not_sig	124	169	67	0	103	168	89	0
chr6_33168798_C_T_b38	204	514	244	474	0.771002	0.0262678	508	0.000397216	not_sig	32	140	187	1	33	178	148	1
chr11_118119236_A_T_b38	453	267	494	226	0.776191	0.026269	509	0.000397998	not_sig	146	161	53	0	166	162	32	0
chr12_610497_C_T_b38	535	185	496	224	1.30602	0.0263111	510	0.00039878	not_sig	196	143	21	0	173	150	37	0
chr1_1426261_C_T_b38	506	190	561	159	0.754799	0.026321	511	0.000399562	not_sig	183	140	25	12	216	129	15	0
chr15_67254963_C_A_b38	491	173	569	151	0.753182	0.0263272	512	0.000400344	not_sig	182	127	23	28	224	121	15	0
chr14_104952007_T_G_b38	310	410	353	367	0.786084	0.0263454	513	0.000401126	not_sig	69	172	119	0	94	165	101	0
chr3_46443407_T_G_b38	191	527	155	565	1.32111	0.0263487	514	0.000401908	not_sig	26	139	194	1	9	137	214	0
chr8_22102366_T_G_b38	190	486	164	554	1.32064	0.0266294	515	0.00040269	not_sig	31	128	179	22	23	118	218	1
chr6_46716485_C_T_b38	523	169	504	214	1.31401	0.0266444	516	0.000403472	not_sig	197	129	20	14	173	158	28	1
chr19_39424997_G_A_b38	322	398	365	355	0.78688	0.0266622	517	0.000404254	not_sig	71	180	109	0	94	177	89	0
chr5_71012424_C_T_b38	156	562	193	525	0.755075	0.0266835	518	0.000405036	not_sig	24	108	227	1	23	147	189	1
chr17_8189376_T_G_b38	166	554	131	589	1.34723	0.0266933	519	0.000405817	not_sig	23	120	217	0	13	105	242	0
chr17_50539297_G_A_b38	646	18	683	37	1.9442	0.0267751	520	0.000406599	not_sig	314	18	0	28	325	33	2	0
chr12_4604869_G_A_b38	656	64	629	91	1.48291	0.0267976	521	0.000407381	not_sig	301	54	5	0	274	81	5	0
chr1_111194776_G_A_b38	426	224	512	208	0.7726	0.0271063	522	0.000408163	not_sig	136	154	35	35	181	150	29	0
chr5_177603176_T_C_b38	233	471	279	441	0.781933	0.0272549	523	0.000408945	not_sig	39	155	158	8	58	163	139	0
chr11_130895136_G_A_b38	589	121	564	156	1.3464	0.0274133	524	0.000409727	not_sig	243	103	9	5	224	116	20	0
chr14_69500133_G_A_b38	594	106	640	80	0.700472	0.0274927	525	0.000410509	not_sig	250	94	6	10	282	76	2	0
chr22_43129170_C_T_b38	145	575	112	608	1.36894	0.027513	526	0.000411291	not_sig	16	113	231	0	8	96	256	0
chr17_41489424_G_A_b38	713	7	701	19	2.76075	0.0275477	527	0.000412073	not_sig	353	7	0	0	342	17	1	0
chr16_90031136_C_T_b38	627	77	666	54	0.660232	0.0276292	528	0.000412855	not_sig	279	69	4	8	308	50	2	0
chr9_128163632_A_C_b38	683	5	720	0	0	0.0276497	529	0.000413637	not_sig	339	5	0	16	360	0	0	0
chr8_22126975_G_A_b38	483	211	461	259	1.28607	0.0277094	530	0.000414419	not_sig	162	159	26	13	144	173	43	0
chrX_49242255_G_A_b38	693	19	691	7	0.369487	0.0277166	531	0.000415201	not_sig	340	13	3	4	343	5	1	11
chr3_58193139_C_T_b38	513	193	480	234	1.29579	0.0278514	532	0.000415982	not_sig	183	147	23	7	155	170	32	3
chr14_20892057_C_G_b38	175	545	213	507	0.764311	0.0279015	533	0.000416764	not_sig	20	135	205	0	38	137	185	0
chrX_53430674_C_T_b38	393	321	436	280	0.786247	0.0280209	534	0.000417546	not_sig	156	81	120	3	174	88	96	2
chr1_16232343_C_A_b38	444	276	402	318	1.27255	0.0281418	535	0.000418328	not_sig	137	170	53	0	116	170	74	0
chr5_170378997_T_C_b38	465	231	520	200	0.774226	0.028236	536	0.00041911	not_sig	150	165	33	12	189	142	29	0
chr19_9297487_G_A_b38	579	83	655	63	0.670965	0.0282667	537	0.000419892	not_sig	253	73	5	29	297	61	1	1
chr17_76292181_T_C_b38	504	216	417	231	1.29257	0.0282732	538	0.000420674	not_sig	183	138	39	0	129	159	36	36
chr1_155062156_C_G_b38	595	125	561	159	1.34909	0.0287337	539	0.000421456	not_sig	245	105	10	0	216	129	15	0
chr9_129084678_T_C_b38	288	402	259	461	1.27517	0.0287604	540	0.000422238	not_sig	68	152	125	15	49	161	150	0
chr15_66332823_A_G_b38	660	60	634	86	1.49211	0.0287833	541	0.00042302	not_sig	303	54	3	0	279	76	5	0
chr12_120091862_G_A_b38	634	86	660	60	0.67019	0.0287833	542	0.000423802	not_sig	278	78	4	0	301	58	1	0
chr2_241108335_A_G_b38	535	133	609	111	0.733175	0.0288653	543	0.000424584	not_sig	215	105	14	26	258	93	9	0
chr3_44448388_T_C_b38	602	118	632	88	0.710363	0.0288789	544	0.000425366	not_sig	250	102	8	0	278	76	6	0
chr2_95100854_C_T_b38	663	11	688	26	2.27775	0.028898	545	0.000426147	not_sig	326	11	0	23	331	26	0	3
chr6_42964462_G_T_b38	386	332	428	290	0.787777	0.0289612	546	0.000426929	not_sig	104	178	77	1	127	174	58	1
chr1_21855402_C_T_b38	695	23	679	41	1.82461	0.0289896	547	0.000427711	not_sig	336	23	0	1	320	39	1	0
chr11_65625224_C_T_b38	488	220	455	263	1.28216	0.0290763	548	0.000428493	not_sig	163	162	29	6	148	159	52	1
chr2_178461008_C_T_b38	671	49	647	73	1.54506	0.0291633	549	0.000429275	not_sig	311	49	0	0	292	63	5	0
chr17_80036614_C_A_b38	646	74	613	101	1.43834	0.0292008	550	0.000430057	not_sig	288	70	2	0	261	91	5	3
chr3_158670932_C_CAAAGAAA_b38	457	251	423	295	1.26977	0.0294395	551	0.000430839	not_sig	140	177	37	6	121	181	57	1
chr6_73363808_C_G_b38	314	392	361	357	0.792145	0.0296269	552	0.000431621	not_sig	72	170	111	7	94	173	92	1
chr19_21423627_G_T_b38	369	351	319	383	1.2622	0.0296469	553	0.000432403	not_sig	93	183	84	0	73	173	105	9
chr19_16659950_C_CCTA_b38	705	13	716	4	0.302965	0.0297562	554	0.000433185	not_sig	346	13	0	1	356	4	0	0
chr9_122166932_A_G_b38	350	358	398	322	0.790966	0.0298016	555	0.000433967	not_sig	97	156	101	6	104	190	66	0
chr8_22581346_C_G_b38	613	107	581	139	1.37061	0.0298204	556	0.000434749	not_sig	260	93	7	0	236	109	15	0
chr22_29268434_G_A_b38	434	264	488	232	0.781545	0.0298338	557	0.000435531	not_sig	136	162	51	11	171	146	43	0
chr11_74171369_C_G_b38	710	4	706	14	3.51983	0.0298887	558	0.000436312	not_sig	353	4	0	3	346	14	0	0
chr19_13918456_A_C_b38	537	173	579	141	0.755908	0.0299723	559	0.000437094	not_sig	202	133	20	5	231	117	12	0
chr11_102606646_G_T_b38	361	355	405	315	0.790923	0.0300692	560	0.000437876	not_sig	92	177	89	2	109	187	64	0
chr20_36773873_ACATGCGTACACCGCCGCCCGACGCG_A_b38	691	17	687	33	1.95248	0.0301463	561	0.000438658	not_sig	338	15	1	6	328	31	1	0
chr10_122327577_T_C_b38	353	367	311	409	1.26494	0.030164	562	0.00043944	not_sig	87	179	94	0	65	181	114	0
chr7_99494729_T_TTTTTA_b38	626	40	695	25	0.56295	0.0302576	563	0.000440222	not_sig	294	38	1	27	335	25	0	0
chr20_25276624_G_C_b38	578	116	567	153	1.34455	0.0303259	564	0.000441004	not_sig	240	98	9	13	220	127	13	0
chr16_88710091_G_T_b38	364	310	431	289	0.787336	0.0303337	565	0.000441786	not_sig	100	164	73	23	132	167	61	0
chr15_43340351_T_C_b38	419	241	497	223	0.780091	0.030341	566	0.000442568	not_sig	140	139	51	30	172	153	35	0
chr7_142874710_C_T_b38	690	4	706	14	3.42068	0.0303412	567	0.00044335	not_sig	343	4	0	13	346	14	0	0
chr1_205917248_T_A_b38	646	74	670	50	0.651472	0.0303818	568	0.000444132	not_sig	286	74	0	0	314	42	4	0
chr6_2953018_T_C_b38	205	515	244	476	0.77654	0.0305788	569	0.000444914	not_sig	34	137	189	0	39	166	155	0
chr9_124801085_G_A_b38	225	487	190	530	1.28877	0.0312101	570	0.000445696	not_sig	32	161	163	4	24	142	194	0
chr3_132682756_C_T_b38	582	102	630	78	0.706443	0.0312239	571	0.000446477	not_sig	244	94	4	18	283	64	7	6
chr7_151239510_G_T_b38	708	12	694	26	2.21037	0.0312636	572	0.000447259	not_sig	348	12	0	0	335	24	1	0
chr3_184331355_C_T_b38	694	26	708	12	0.452412	0.0312636	573	0.000448041	not_sig	335	24	1	0	348	12	0	0
chrX_138711673_G_A_b38	579	87	633	65	0.683391	0.0312722	574	0.000448823	not_sig	268	43	22	27	300	33	16	11
chr19_49464815_G_A_b38	649	9	718	2	0.200867	0.0313378	575	0.000449605	not_sig	320	9	0	31	358	2	0	0
chr12_116750102_T_C_b38	597	121	628	92	0.722798	0.0313839	576	0.000450387	not_sig	245	107	7	1	271	86	3	0
chr16_88706338_C_T_b38	404	310	407	245	0.784497	0.0314651	577	0.000451169	not_sig	113	178	66	3	129	149	48	34
chr1_226883676_T_C_b38	178	540	144	576	1.31852	0.031498	578	0.000451951	not_sig	33	112	214	1	13	118	229	0
chr1_21856983_A_G_b38	688	24	678	42	1.77581	0.0316165	579	0.000452733	not_sig	332	24	0	4	319	40	1	0
chr17_40834751_T_C_b38	619	101	588	132	1.37583	0.0316608	580	0.000453515	not_sig	265	89	6	0	244	100	16	0
chr19_10565861_C_A_b38	537	173	505	211	1.29694	0.0316623	581	0.000454297	not_sig	204	129	22	5	176	153	29	2
chr6_20124629_G_A_b38	490	176	566	154	0.757509	0.0317984	582	0.000455079	not_sig	183	124	26	27	224	118	18	0
chr19_36236463_G_A_b38	448	272	407	313	1.26666	0.0318122	583	0.000455861	not_sig	138	172	50	0	119	169	72	0
chr3_52373025_C_T_b38	495	211	466	254	1.27871	0.031846	584	0.000456642	not_sig	180	135	38	7	149	168	43	0
chr16_67958069_C_T_b38	595	55	681	39	0.619543	0.0318991	585	0.000457424	not_sig	271	53	1	35	321	39	0	0
chr5_141174900_G_T_b38	514	194	557	161	0.765829	0.0320704	586	0.000458206	not_sig	187	140	27	6	216	125	18	1
chr1_1439454_A_G_b38	527	193	507	141	0.759389	0.0321427	587	0.000458988	not_sig	197	133	30	0	196	115	13	36
chr17_4074238_G_A_b38	620	84	605	115	1.40299	0.0321759	588	0.00045977	not_sig	271	78	3	8	257	91	12	0
chr16_1215600_G_A_b38	622	84	606	114	1.39298	0.0322524	589	0.000460552	not_sig	274	74	5	7	256	94	10	0
chr22_31944894_C_CG_b38	456	262	390	284	1.26741	0.0322934	590	0.000461334	not_sig	152	152	55	1	121	148	68	23
chr5_80654962_A_G_b38	145	535	187	525	0.760908	0.0324847	591	0.000462116	not_sig	16	113	211	20	21	145	190	4
chr16_31381987_G_A_b38	550	170	571	133	0.75358	0.0325617	592	0.000462898	not_sig	206	138	16	0	238	95	19	8
chr11_124874109_C_T_b38	655	57	683	37	0.622512	0.0325779	593	0.00046368	not_sig	303	49	4	4	325	33	2	0
chr3_36908471_G_T_b38	519	179	570	150	0.763011	0.0325999	594	0.000464462	not_sig	190	139	20	11	225	120	15	0
chr8_63038753_A_G_b38	467	211	532	186	0.773812	0.0326727	595	0.000465244	not_sig	156	155	28	21	199	134	26	1
chr5_141187871_A_G_b38	538	182	573	147	0.758357	0.0327423	596	0.000466025	not_sig	201	136	23	0	229	115	16	0
chr5_141187690_G_T_b38	538	182	573	147	0.758357	0.0327423	597	0.000466807	not_sig	201	136	23	0	229	115	16	0
chr3_52535933_C_T_b38	710	10	697	23	2.3429	0.0330336	598	0.000467589	not_sig	350	10	0	0	337	23	0	0
chr1_236555959_G_A_b38	284	430	247	473	1.26478	0.0330528	599	0.000468371	not_sig	56	172	129	3	41	165	154	0
chr6_17600388_A_G_b38	485	235	520	196	0.777905	0.0330876	600	0.000469153	not_sig	166	153	41	0	191	138	29	2
chr22_17683229_T_G_b38	560	110	568	150	1.34443	0.0331154	601	0.000469935	not_sig	230	100	5	25	222	124	13	1
chr9_4860300_A_G_b38	196	518	235	485	0.780909	0.0332103	602	0.000470717	not_sig	25	146	186	3	37	161	162	0
chr10_122082616_T_C_b38	703	17	714	6	0.347504	0.033277	603	0.000471499	not_sig	343	17	0	0	355	4	1	0
chr19_38907776_A_G_b38	473	247	433	287	1.26928	0.0333153	604	0.000472281	not_sig	150	173	37	0	133	167	60	0
chr1_1312114_T_C_b38	170	550	136	584	1.32727	0.0334102	605	0.000473063	not_sig	19	132	209	0	11	114	235	0
chr3_180912777_T_C_b38	528	168	580	140	0.758621	0.0336243	606	0.000473845	not_sig	196	136	16	12	232	116	12	0
chr1_220755034_T_C_b38	703	11	717	3	0.267402	0.0336356	607	0.000474627	not_sig	346	11	0	3	357	3	0	0
chr9_125220496_CT_C_b38	300	420	340	378	0.794118	0.0337606	608	0.000475409	not_sig	57	186	117	0	73	194	92	1
chr17_75763471_G_A_b38	198	506	240	480	0.782609	0.0337926	609	0.00047619	not_sig	26	146	180	8	43	154	163	0
chr17_6610009_G_A_b38	429	291	469	251	0.788979	0.0338486	610	0.000476972	not_sig	120	189	51	0	155	159	46	0
chr7_34849940_T_C_b38	476	222	452	268	1.27131	0.0338624	611	0.000477754	not_sig	165	146	38	11	147	158	55	0
chr2_162198214_C_T_b38	700	20	712	8	0.393258	0.0339411	612	0.000478536	not_sig	342	16	2	0	353	6	1	0
chr5_177404825_C_G_b38	20	700	8	710	2.53571	0.0339435	613	0.000479318	not_sig	2	16	342	0	0	8	351	1
chr14_104740703_C_T_b38	646	72	621	99	1.43035	0.0339539	614	0.0004801	not_sig	291	64	4	1	269	83	8	0
chr6_143189720_T_G_b38	662	38	698	22	0.549088	0.0340163	615	0.000480882	not_sig	313	36	1	10	338	22	0	0
chr11_66265959_C_T_b38	615	105	584	136	1.36399	0.0340408	616	0.000481664	not_sig	261	93	6	0	241	102	17	0
chr12_63668272_G_A_b38	541	157	591	129	0.752142	0.0341801	617	0.000482446	not_sig	207	127	15	11	242	107	11	0
chr14_104938047_T_C_b38	306	414	347	373	0.794512	0.0341908	618	0.000483228	not_sig	67	172	121	0	89	169	102	0
chr2_26184251_A_T_b38	708	12	715	3	0.247552	0.0342351	619	0.00048401	not_sig	348	12	0	0	356	3	0	1
chr2_25161836_T_C_b38	644	22	709	11	0.454161	0.0343451	620	0.000484792	not_sig	311	22	0	27	349	11	0	0
chr7_5073179_C_G_b38	680	6	703	17	2.74064	0.0344267	621	0.000485574	not_sig	337	6	0	17	343	17	0	0
chr12_124378223_G_T_b38	677	33	667	53	1.63014	0.0344283	622	0.000486355	not_sig	324	29	2	5	308	51	1	0
chr7_23692169_C_T_b38	383	309	432	276	0.791891	0.0345438	623	0.000487137	not_sig	107	169	70	14	133	166	55	6
chr1_54609167_T_A_b38	361	359	320	400	1.25696	0.0347112	624	0.000487919	not_sig	99	163	98	0	67	186	107	0
chr10_101002499_C_T_b38	376	340	337	383	1.25683	0.0347206	625	0.000488701	not_sig	102	172	84	2	75	187	98	0
chrX_72273841_C_T_b38	174	526	141	561	1.31616	0.0347286	626	0.000489483	not_sig	54	66	230	10	44	53	254	9
chr11_1243877_C_T_b38	668	48	675	29	0.597901	0.0348284	627	0.000490265	not_sig	310	48	0	2	323	29	0	8
chr19_36656428_T_G_b38	442	266	488	232	0.789967	0.0349836	628	0.000491047	not_sig	126	190	38	6	160	168	32	0
chr17_43877947_G_A_b38	672	6	703	17	2.70839	0.0350635	629	0.000491829	not_sig	333	6	0	21	343	17	0	0
chr3_47502513_C_A_b38	379	311	435	283	0.792823	0.0352623	630	0.000492611	not_sig	102	175	68	15	132	171	56	1
chr1_23362440_A_G_b38	169	551	205	515	0.770528	0.0353451	631	0.000493393	not_sig	21	127	212	0	29	147	184	0
chr2_230172150_G_A_b38	598	64	624	96	1.4375	0.0354662	632	0.000494175	not_sig	270	58	3	29	271	82	7	0
chr10_104214223_C_G_b38	579	141	545	175	1.31856	0.0355194	633	0.000494957	not_sig	237	105	18	0	199	147	14	0
chr19_3855479_T_C_b38	432	222	513	205	0.77762	0.0355383	634	0.000495739	not_sig	136	160	31	33	185	143	31	1
chr15_83112846_C_T_b38	620	58	680	40	0.628803	0.0356174	635	0.00049652	not_sig	283	54	2	21	322	36	2	0
chr11_77183190_G_C_b38	277	413	329	389	0.793019	0.0357279	636	0.000497302	not_sig	50	177	118	15	75	179	105	1
chr1_40758336_C_T_b38	535	153	525	195	1.29879	0.0358301	637	0.000498084	not_sig	207	121	16	16	190	145	25	0
chr14_103102277_T_A_b38	549	171	512	206	1.29174	0.0358527	638	0.000498866	not_sig	216	117	27	0	181	150	28	1
chr7_100753140_T_G_b38	565	141	542	178	1.31598	0.0358865	639	0.000499648	not_sig	226	113	14	7	209	124	27	0
chr22_29310570_C_T_b38	697	13	693	27	2.08891	0.0359996	640	0.00050043	not_sig	342	13	0	5	333	27	0	0
chr19_49115200_C_T_b38	458	224	521	199	0.780967	0.0361585	641	0.000501212	not_sig	161	136	44	19	184	153	23	0
chr10_87008666_A_G_b38	449	271	409	311	1.25984	0.0361904	642	0.000501994	not_sig	132	185	43	0	119	171	70	0
chr12_88060817_T_TA_b38	44	628	66	606	0.643312	0.0362466	643	0.000502776	not_sig	1	42	293	24	2	62	272	24
chr6_26285455_T_C_b38	276	432	321	399	0.794133	0.0363569	644	0.000503558	not_sig	51	174	129	6	67	187	106	0
chr16_4337260_A_C_b38	617	81	609	111	1.38837	0.0364228	645	0.00050434	not_sig	273	71	5	11	260	89	11	0
chr2_238102049_C_A_b38	611	109	580	140	1.35305	0.036428	646	0.000505122	not_sig	259	93	8	0	236	108	16	0
chr16_88711725_C_A_b38	237	473	279	441	0.791993	0.0364498	647	0.000505904	not_sig	42	153	160	5	56	167	137	0
chr2_176172026_T_C_b38	211	509	249	471	0.784127	0.0364536	648	0.000506685	not_sig	36	139	185	0	42	165	153	0
chr5_128966131_T_A_b38	483	237	444	276	1.26685	0.036473	649	0.000507467	not_sig	159	165	36	0	141	162	57	0
chr16_28605987_A_G_b38	439	213	443	273	1.27012	0.0364995	650	0.000508249	not_sig	147	145	34	34	135	173	50	2
chr9_121326453_A_G_b38	638	16	713	7	0.39148	0.0365071	651	0.000509031	not_sig	312	14	1	33	353	7	0	0
chr16_67979568_T_C_b38	556	164	589	131	0.754027	0.0365585	652	0.000509813	not_sig	219	118	23	0	242	105	13	0
chr2_74463251_C_T_b38	578	128	619	101	0.736798	0.0365736	653	0.000510595	not_sig	232	114	7	7	265	89	6	0
chr7_45921046_G_C_b38	441	269	374	288	1.26243	0.0366173	654	0.000511377	not_sig	134	173	48	5	109	156	66	29
chr6_44250173_A_G_b38	704	16	689	31	1.97968	0.0367995	655	0.000512159	not_sig	344	16	0	0	329	31	0	0
chr5_122182614_G_A_b38	391	319	436	284	0.798395	0.0368792	656	0.000512941	not_sig	107	177	71	5	136	164	60	0
chr16_68217881_C_G_b38	578	140	610	110	0.744496	0.0368937	657	0.000513723	not_sig	233	112	14	1	256	98	6	0
chr14_92161324_T_A_b38	371	287	445	273	0.793039	0.0369221	658	0.000514505	not_sig	104	163	62	31	142	161	56	1
chr16_74628699_C_T_b38	490	160	577	143	0.75899	0.0370004	659	0.000515287	not_sig	185	120	20	35	229	119	12	0
chr7_75994575_G_A_b38	596	84	656	64	0.692218	0.0370396	660	0.000516068	not_sig	258	80	2	20	297	62	1	0
chr17_74612787_G_A_b38	510	192	486	234	1.27894	0.037119	661	0.00051685	not_sig	183	144	24	9	169	148	43	0
chr19_37470246_G_GGT_b38	654	8	699	21	2.45601	0.0371415	662	0.000517632	not_sig	323	8	0	29	340	19	1	0
chr19_57840921_G_A_b38	102	612	76	642	1.40789	0.0372217	663	0.000518414	not_sig	12	78	267	3	2	72	285	1
chr9_135549839_G_GC_b38	540	176	504	212	1.29058	0.0373571	664	0.000519196	not_sig	183	174	1	2	175	154	29	2
chr19_1049306_C_A_b38	599	121	628	92	0.72522	0.0374917	665	0.000519978	not_sig	250	99	11	0	273	82	5	0
chr19_52950524_C_T_b38	438	282	475	243	0.79458	0.0375044	666	0.00052076	not_sig	139	160	61	0	155	165	39	1
chr3_53181783_G_A_b38	571	119	625	95	0.729345	0.0375732	667	0.000521542	not_sig	236	99	10	15	274	77	9	0
chr7_149777533_G_A_b38	646	60	680	40	0.633333	0.0376052	668	0.000522324	not_sig	296	54	3	7	321	38	1	0
chr10_30459569_T_C_b38	588	84	655	65	0.694656	0.037615	669	0.000523106	not_sig	255	78	3	24	298	59	3	0
chr7_37894544_T_C_b38	471	245	434	284	1.25801	0.0376584	670	0.000523888	not_sig	158	155	45	2	132	170	57	1
chr20_277092_A_G_b38	286	434	247	473	1.26195	0.0380368	671	0.00052467	not_sig	55	176	129	0	39	169	152	0
chr6_42963486_G_A_b38	388	332	428	292	0.79732	0.03804	672	0.000525452	not_sig	105	178	77	0	127	174	59	0
chr1_16940153_C_T_b38	539	117	621	99	0.734423	0.0380998	673	0.000526233	not_sig	219	101	8	32	269	83	8	0
chr19_11166556_G_A_b38	379	337	420	298	0.797951	0.0381014	674	0.000527015	not_sig	106	167	85	2	124	172	63	1
chr11_120327384_G_A_b38	472	248	433	287	1.26149	0.0381853	675	0.000527797	not_sig	159	154	47	0	139	155	66	0
chr11_125677765_C_G_b38	608	112	577	143	1.34538	0.0382193	676	0.000528579	not_sig	257	94	9	0	224	129	7	0
chr6_35457486_G_A_b38	665	49	689	31	0.610616	0.0383294	677	0.000529361	not_sig	310	45	2	3	329	31	0	0
chr11_130915409_T_C_b38	595	123	565	155	1.32707	0.038382	678	0.000530143	not_sig	245	105	9	1	225	115	20	0
chr1_161213726_C_T_b38	615	103	643	77	0.715019	0.0383907	679	0.000530925	not_sig	265	85	9	1	286	71	3	0
chr11_67370256_A_G_b38	653	67	675	45	0.649751	0.0383948	680	0.000531707	not_sig	297	59	4	0	316	43	1	0
chr5_40841469_CTT_C_b38	709	11	695	23	2.13303	0.0384147	681	0.000532489	not_sig	349	11	0	0	336	23	0	1
chr20_63737253_T_C_b38	182	538	148	572	1.30744	0.0384407	682	0.000533271	not_sig	23	136	201	0	15	118	227	0
chr1_34761705_C_A_b38	712	8	719	1	0.123783	0.0384776	683	0.000534053	not_sig	352	8	0	0	359	1	0	0
chr10_122987285_T_G_b38	235	485	198	522	1.27741	0.0384972	684	0.000534835	not_sig	39	157	164	0	34	130	196	0
chr19_39487970_GTGTA_G_b38	308	400	353	367	0.800538	0.0385094	685	0.000535617	not_sig	68	172	114	6	87	179	94	0
chr10_133285117_G_A_b38	696	24	709	11	0.449929	0.0385484	686	0.000536398	not_sig	336	24	0	0	349	11	0	0
chr21_46256797_G_A_b38	430	290	469	251	0.793545	0.0386222	687	0.00053718	not_sig	139	152	69	0	151	167	42	0
chr2_36883902_T_A_b38	341	379	301	419	1.25246	0.0386344	688	0.000537962	not_sig	84	173	103	0	57	187	116	0
chr6_73394834_C_G_b38	302	414	343	377	0.801777	0.0386744	689	0.000538744	not_sig	68	166	124	2	89	165	106	0
chr15_40297629_G_A_b38	322	382	369	351	0.801813	0.0387598	690	0.000539526	not_sig	66	190	96	8	96	177	87	0
chr14_104775041_C_T_b38	650	70	624	96	1.42857	0.0388681	691	0.000540308	not_sig	294	62	4	0	272	80	8	0
chr3_184372478_C_T_b38	311	401	354	366	0.801851	0.0388839	692	0.00054109	not_sig	71	169	116	4	90	174	96	0
chr1_1468592_C_CG_b38	638	60	675	41	0.645877	0.0389729	693	0.000541872	not_sig	292	54	3	11	318	39	1	2
chr2_241064070_C_T_b38	572	132	615	105	0.739837	0.0389758	694	0.000542654	not_sig	230	112	10	8	266	83	11	0
chrX_48901927_C_T_b38	267	453	296	400	0.796492	0.0390619	695	0.000543436	not_sig	88	91	181	0	101	94	153	12
chr12_52291312_C_G_b38	535	183	494	216	1.27829	0.0391283	696	0.000544218	not_sig	199	137	23	1	166	162	27	5
chr3_94094327_C_G_b38	495	197	550	170	0.77665	0.039179	697	0.000545	not_sig	173	149	24	14	209	132	19	0
chr17_8253992_C_T_b38	169	549	137	583	1.30997	0.0392519	698	0.000545782	not_sig	24	121	214	1	9	119	232	0
chr12_121444045_G_A_b38	425	295	464	256	0.794857	0.0393208	699	0.000546563	not_sig	126	173	61	0	159	146	55	0
chr11_120337548_T_G_b38	463	257	424	296	1.25769	0.0394561	700	0.000547345	not_sig	151	161	48	0	132	160	68	0
chr3_36899250_G_T_b38	517	183	566	154	0.768677	0.039463	701	0.000548127	not_sig	189	139	22	10	222	122	16	0
chr6_42960723_C_T_b38	363	357	401	317	0.80381	0.0395115	702	0.000548909	not_sig	93	177	90	0	116	169	74	1
chr5_141175227_T_A_b38	394	302	446	272	0.795652	0.0395393	703	0.000549691	not_sig	106	182	60	12	140	166	53	1
chr1_54609779_G_A_b38	363	357	323	397	1.24976	0.0395743	704	0.000550473	not_sig	100	163	97	0	70	183	107	0
chr12_105188467_A_G_b38	199	517	166	554	1.28459	0.0395966	705	0.000551255	not_sig	26	147	185	2	15	136	209	0
chr20_3046574_G_A_b38	535	185	569	151	0.767444	0.0396784	706	0.000552037	not_sig	196	143	21	0	226	117	17	0
chr13_49630889_T_C_b38	370	350	330	390	1.24935	0.039719	707	0.000552819	not_sig	90	190	80	0	70	190	100	0
chr20_62352293_C_T_b38	67	651	46	674	1.50798	0.0398628	708	0.000553601	not_sig	3	61	295	1	1	44	315	0
chr19_11487409_C_T_b38	705	15	715	5	0.328671	0.0400087	709	0.000554383	not_sig	345	15	0	0	355	5	0	0
chr7_135557955_C_T_b38	656	2	710	10	4.61972	0.0400347	710	0.000555165	not_sig	327	2	0	31	350	10	0	0
chr9_136418544_C_T_b38	523	183	498	222	1.27401	0.0400883	711	0.000555947	not_sig	195	133	25	7	179	140	41	0
chr19_45810567_A_T_b38	151	551	189	531	0.769942	0.0401255	712	0.000556728	not_sig	9	133	209	9	22	145	193	0
chr11_119018363_G_T_b38	645	51	641	75	1.47977	0.0401624	713	0.00055751	not_sig	300	45	3	12	286	69	3	2
chr22_24186073_A_G_b38	680	36	664	56	1.59304	0.0401664	714	0.000558292	not_sig	322	36	0	2	307	50	3	0
chr1_1197558_G_A_b38	626	90	642	64	0.693389	0.0402774	715	0.000559074	not_sig	271	84	3	2	291	60	2	7
chr7_74788740_C_G_b38	155	557	187	517	0.769353	0.0403733	716	0.000559856	not_sig	20	115	221	4	24	139	189	8
chr17_70176185_C_T_b38	639	79	614	106	1.3964	0.0403983	717	0.000560638	not_sig	288	63	8	1	267	80	13	0
chr6_36685820_C_T_b38	614	60	677	43	0.649975	0.0404219	718	0.00056142	not_sig	278	58	1	23	317	43	0	0
chr12_63668243_A_C_b38	541	157	590	130	0.759257	0.0404571	719	0.000562202	not_sig	207	127	15	11	241	108	11	0
chr17_3673852_C_T_b38	638	82	662	58	0.681674	0.0404586	720	0.000562984	not_sig	279	80	1	0	304	54	2	0
chr14_73592128_C_T_b38	445	271	483	233	0.792136	0.0405758	721	0.000563766	not_sig	138	169	51	2	165	153	40	2
chr21_42434957_A_C_b38	521	167	510	210	1.28461	0.040706	722	0.000564548	not_sig	194	133	17	16	176	158	26	0
chr9_92600383_G_A_b38	497	223	533	187	0.781926	0.0409022	723	0.00056533	not_sig	178	141	41	0	191	151	18	0
chr7_102472646_T_C_b38	223	497	187	531	1.27409	0.0409581	724	0.000566112	not_sig	39	145	176	0	28	131	200	1
chr9_114424432_C_T_b38	541	173	578	142	0.768266	0.0413306	725	0.000566893	not_sig	201	139	17	3	231	116	13	0
chr11_67074998_G_A_b38	649	69	671	47	0.658826	0.0415922	726	0.000567675	not_sig	294	61	4	1	313	45	1	1
chr10_102403812_G_A_b38	445	275	483	237	0.794015	0.0416073	727	0.000568457	not_sig	141	163	56	0	164	155	41	0
chr5_150375777_G_T_b38	651	69	673	47	0.658893	0.041617	728	0.000569239	not_sig	295	61	4	0	315	43	2	0
chr16_2764161_G_A_b38	142	578	175	545	0.765101	0.0417233	729	0.000570021	not_sig	13	116	231	0	23	129	208	0
chr2_238353225_G_A_b38	458	224	520	200	0.786401	0.0417878	730	0.000570803	not_sig	148	162	31	19	189	142	29	0
chr4_76104657_G_A_b38	607	79	608	110	1.39011	0.041842	731	0.000571585	not_sig	267	73	3	17	263	82	14	1
chr14_23995101_C_A_b38	670	14	682	28	1.96481	0.0419436	732	0.000572367	not_sig	328	14	0	18	328	26	1	5
chr14_77321352_G_T_b38	647	73	621	99	1.41294	0.0419704	733	0.000573149	not_sig	295	57	8	0	265	91	4	0
chrX_101407913_G_A_b38	607	49	672	34	0.626761	0.0419776	734	0.000573931	not_sig	292	23	13	32	326	20	7	7
chr2_11580860_G_A_b38	567	115	627	93	0.731309	0.0423104	735	0.000574713	not_sig	235	97	9	19	273	81	6	0
chr5_135029306_G_T_b38	600	98	645	75	0.711913	0.0423159	736	0.000575495	not_sig	257	86	6	11	290	65	5	0
chr1_155177242_G_A_b38	405	281	463	257	0.80002	0.0425324	737	0.000576276	not_sig	112	181	50	17	145	173	42	0
chr17_75001269_T_TAGG_b38	427	251	491	229	0.793429	0.0425488	738	0.000577058	not_sig	133	161	45	21	168	155	37	0
chr12_120659819_G_A_b38	80	612	110	610	0.724896	0.042716	739	0.00057784	not_sig	5	70	271	14	6	98	256	0
chr6_24653148_G_A_b38	194	522	231	489	0.786734	0.0429786	740	0.000578622	not_sig	30	134	194	2	31	169	160	0
chr6_159685056_C_A_b38	382	318	350	362	1.24244	0.0431131	741	0.000579404	not_sig	100	182	68	10	87	176	93	4
chr20_62322015_A_G_b38	70	650	48	672	1.50769	0.0432423	742	0.000580186	not_sig	2	66	292	0	1	46	313	0
chr2_218636410_G_A_b38	293	427	332	388	0.801924	0.0432978	743	0.000580968	not_sig	55	183	122	0	75	182	103	0
chr9_109167344_C_G_b38	489	183	525	151	0.768556	0.0434081	744	0.00058175	not_sig	173	143	20	24	203	119	16	22
chr13_49524240_G_T_b38	637	57	660	38	0.643434	0.0435723	745	0.000582532	not_sig	292	53	2	13	312	36	1	11
chr2_74472651_C_A_b38	584	128	619	101	0.744447	0.0436294	746	0.000583314	not_sig	235	114	7	4	265	89	6	0
chr1_155015050_C_T_b38	383	337	420	298	0.806373	0.0437842	747	0.000584096	not_sig	92	199	69	0	130	160	69	1
chr13_102694309_G_A_b38	449	259	410	296	1.25157	0.0438695	748	0.000584878	not_sig	144	161	49	6	125	160	68	7
chr17_8263060_T_C_b38	213	507	178	540	1.27452	0.0439268	749	0.00058566	not_sig	36	141	183	0	15	148	196	1
chr20_63247598_A_C_b38	429	289	468	252	0.799308	0.0439683	750	0.000586441	not_sig	122	185	52	1	149	170	41	0
chr3_138124176_G_C_b38	221	483	263	457	0.79507	0.0439987	751	0.000587223	not_sig	40	141	171	8	56	151	153	0
chr19_5789554_T_C_b38	566	152	598	122	0.759681	0.0440181	752	0.000588005	not_sig	226	114	19	1	248	102	10	0
chr1_202160698_T_C_b38	377	343	416	304	0.803207	0.0440599	753	0.000588787	not_sig	97	183	80	0	116	184	60	0
chr1_109713505_G_A_b38	651	69	609	91	1.4098	0.0441179	754	0.000589569	not_sig	298	55	7	0	263	83	4	10
chr3_49792599_C_T_b38	676	38	660	58	1.56332	0.0442743	755	0.000590351	not_sig	320	36	1	3	306	48	5	1
chr5_132660151_T_C_b38	165	549	135	585	1.30237	0.0442833	756	0.000591133	not_sig	21	123	213	3	12	111	237	0
chr21_36135203_G_A_b38	412	308	373	347	1.24442	0.0442882	757	0.000591915	not_sig	117	178	65	0	91	191	78	0
chr1_1704835_C_T_b38	360	358	319	393	1.23886	0.0443608	758	0.000592697	not_sig	100	160	99	1	75	169	112	4
chr5_177532295_T_G_b38	360	356	401	319	0.80445	0.0444846	759	0.000593479	not_sig	87	186	85	2	110	181	69	0
chr1_1285574_G_A_b38	678	42	695	25	0.580678	0.0445637	760	0.000594261	not_sig	322	34	4	0	336	23	1	0
chrX_3612153_G_T_b38	289	369	351	359	0.801048	0.044814	761	0.000595043	not_sig	96	97	136	31	134	83	138	5
chr17_8229445_T_C_b38	167	545	137	583	1.30397	0.0450726	762	0.000595825	not_sig	23	121	212	4	15	107	238	0
chr3_194648850_C_A_b38	548	128	613	107	0.747298	0.0451231	763	0.000596606	not_sig	216	116	6	22	260	93	7	0
chr19_57231104_G_C_b38	151	509	132	586	1.31699	0.045133	764	0.000597388	not_sig	33	85	212	30	13	106	240	1
chr17_3664167_G_A_b38	85	631	62	658	1.42963	0.0452451	765	0.00059817	not_sig	1	83	274	2	2	58	300	0
chr2_218738096_G_A_b38	385	333	348	372	1.23589	0.0452607	766	0.000598952	not_sig	99	187	73	1	85	178	97	0
chr11_60064243_C_A_b38	511	181	496	224	1.275	0.0453242	767	0.000599734	not_sig	192	127	27	14	164	168	28	0
chr21_43028653_G_C_b38	435	263	411	309	1.24351	0.04536	768	0.000600516	not_sig	137	161	51	11	125	161	74	0
chr22_50314340_C_T_b38	691	29	705	15	0.50697	0.0453689	769	0.000601298	not_sig	332	27	1	0	345	15	0	0
chr3_58193301_T_C_b38	470	180	484	236	1.27319	0.0454268	770	0.00060208	not_sig	168	134	23	35	156	172	32	0
chr12_121444295_T_G_b38	421	299	459	261	0.800643	0.0454462	771	0.000602862	not_sig	124	173	63	0	155	149	56	0
chr4_1375305_C_G_b38	204	514	240	480	0.793774	0.0458041	772	0.000603644	not_sig	36	132	191	1	35	170	155	0
chr1_1480990_T_C_b38	608	58	652	40	0.643114	0.0458149	773	0.000604426	not_sig	282	44	7	27	308	36	2	14
chr2_130144976_C_T_b38	481	239	429	267	1.25257	0.0458726	774	0.000605208	not_sig	163	155	42	0	139	151	58	12
chr20_63244145_A_C_b38	234	424	294	426	0.799673	0.0459845	775	0.00060599	not_sig	38	158	133	31	61	172	127	0
chr19_52300416_CTG_C_b38	219	499	185	535	1.26919	0.0460592	776	0.000606771	not_sig	27	165	167	1	23	139	198	0
chr17_75843417_G_A_b38	512	206	476	242	1.2636	0.0461385	777	0.000607553	not_sig	189	134	36	1	157	162	40	1
chr19_57477298_A_AGCC_b38	479	219	529	191	0.789713	0.0464754	778	0.000608335	not_sig	164	151	34	11	193	143	24	0
chr1_33349260_C_G_b38	513	207	477	243	1.26251	0.0465428	779	0.000609117	not_sig	188	137	35	0	154	169	37	0
chr5_177397136_C_G_b38	487	207	469	251	1.2591	0.0466684	780	0.000609899	not_sig	166	155	26	13	156	157	47	0
chr17_8143454_C_G_b38	95	625	70	650	1.41143	0.0468176	781	0.000610681	not_sig	8	79	273	0	3	64	293	0
chr11_62611188_G_A_b38	484	236	445	271	1.24894	0.0468995	782	0.000611463	not_sig	162	160	38	0	134	177	47	2
chr3_134486229_G_T_b38	209	509	245	473	0.792727	0.0469303	783	0.000612245	not_sig	31	147	181	1	39	167	153	1
chr2_97560842_C_G_b38	261	407	227	445	1.25713	0.0469767	784	0.000613027	not_sig	56	149	129	26	33	161	142	24
chr11_62598147_A_G_b38	480	236	446	274	1.24952	0.0471369	785	0.000613809	not_sig	160	160	38	2	133	180	47	0
chr1_155135811_G_A_b38	395	317	435	281	0.804924	0.0471781	786	0.000614591	not_sig	105	185	66	4	130	175	53	2
chr3_126068283_C_T_b38	421	275	473	247	0.799439	0.0472902	787	0.000615373	not_sig	126	169	53	12	153	167	40	0
chr15_74203033_A_C_b38	587	127	561	159	1.30999	0.047302	788	0.000616155	not_sig	242	103	12	3	221	119	20	0
chr12_6944199_A_G_b38	95	619	123	597	0.744907	0.0473663	789	0.000616936	not_sig	12	71	274	3	12	99	249	0
chr15_89631593_C_T_b38	316	402	279	441	1.2425	0.0475458	790	0.000617718	not_sig	71	174	114	1	52	175	133	0
chr9_114323961_G_A_b38	659	39	660	60	1.53613	0.0475511	791	0.0006185	not_sig	310	39	0	11	300	60	0	0
chr16_31087690_T_C_b38	698	22	710	10	0.446863	0.04759	792	0.000619282	not_sig	339	20	1	0	350	10	0	0
chr19_49036329_G_A_b38	677	43	694	26	0.58984	0.0476587	793	0.000620064	not_sig	319	39	2	0	335	24	1	0
chr5_177466941_C_T_b38	716	4	707	13	3.29137	0.0477336	794	0.000620846	not_sig	356	4	0	0	347	13	0	0
chr16_1534617_T_C_b38	388	282	454	264	0.800075	0.047744	795	0.000621628	not_sig	107	174	54	25	143	168	48	1
chr16_84368669_G_C_b38	466	202	537	183	0.786161	0.0477777	796	0.00062241	not_sig	164	138	32	26	201	135	24	0
chr17_47944699_G_A_b38	608	58	678	42	0.649374	0.0479281	797	0.000623192	not_sig	278	52	3	27	320	38	2	0
chr10_17229401_G_C_b38	469	249	505	213	0.794441	0.0479623	798	0.000623974	not_sig	152	165	42	1	180	145	34	1
chr12_120151048_A_G_b38	140	554	177	543	0.775255	0.048236	799	0.000624756	not_sig	10	120	217	13	20	137	203	0
chr4_40776129_C_T_b38	117	597	147	571	0.761255	0.0482677	800	0.000625538	not_sig	9	99	249	3	13	121	225	1
chr20_63688251_A_C_b38	174	546	142	578	1.29717	0.0482909	801	0.000626319	not_sig	17	140	203	0	12	118	230	0
chr17_6635035_G_A_b38	433	285	397	323	1.2361	0.048443	802	0.000627101	not_sig	130	173	56	1	108	181	71	0
chr7_128891018_T_A_b38	583	137	600	106	0.7518	0.0485181	803	0.000627883	not_sig	235	113	12	0	251	98	4	7
chr11_33054645_T_C_b38	192	526	227	493	0.792751	0.0485352	804	0.000628665	not_sig	21	150	188	1	36	155	169	0
chr14_77484800_T_C_b38	707	13	683	25	1.99065	0.0485461	805	0.000629447	not_sig	347	13	0	0	329	25	0	6
chr17_410351_G_T_b38	546	174	512	208	1.27478	0.0487818	806	0.000630229	not_sig	204	138	18	0	183	146	31	0
chr11_62692522_A_G_b38	158	554	192	526	0.781325	0.049044	807	0.000631011	not_sig	20	118	218	4	22	148	189	1
chr9_15571632_T_A_b38	658	38	687	23	0.579713	0.0490494	808	0.000631793	not_sig	310	38	0	12	333	21	1	5
chr7_100762174_G_T_b38	524	196	484	228	1.2594	0.0491417	809	0.000632575	not_sig	190	144	26	0	165	154	37	4
chr6_42978752_C_A_b38	388	332	426	294	0.80655	0.0491538	810	0.000633357	not_sig	105	178	77	0	127	172	61	0
chr9_114407961_G_C_b38	623	97	648	72	0.713631	0.0491558	811	0.000634139	not_sig	267	89	4	0	292	64	4	0
chr2_130142615_A_G_b38	472	248	435	285	1.24694	0.0493898	812	0.000634921	not_sig	156	160	44	0	134	167	59	0
chr16_67146268_T_C_b38	629	65	673	47	0.675803	0.0494364	813	0.000635703	not_sig	285	59	3	13	315	43	2	0
chr8_22571195_A_G_b38	556	116	564	154	1.30876	0.0494767	814	0.000636484	not_sig	231	94	11	24	220	124	15	1
chr19_14518338_G_A_b38	482	230	519	197	0.795459	0.0495661	815	0.000637266	not_sig	161	160	35	4	193	133	32	2
chr16_84196770_T_C_b38	410	304	375	343	1.2336	0.0496232	816	0.000638048	not_sig	125	160	72	3	104	167	88	1
chr1_236538909_C_T_b38	287	429	252	468	1.24242	0.0498035	817	0.00063883	not_sig	58	171	129	2	42	168	150	0
chr11_6508876_A_G_b38	588	132	556	162	1.29791	0.0498592	818	0.000639612	not_sig	243	102	15	0	218	120	21	1
chr9_113428889_A_G_b38	650	58	638	82	1.44038	0.0499583	819	0.000640394	not_sig	298	54	2	6	286	66	8	0
chr11_6244012_G_C_b38	701	19	712	8	0.414548	0.0500643	820	0.000641176	not_sig	341	19	0	0	352	8	0	0
chr10_100984574_A_T_b38	412	308	374	346	1.23752	0.050154	821	0.000641958	not_sig	119	174	67	0	93	188	79	0
chr1_159856126_C_T_b38	362	302	431	289	0.803752	0.0501986	822	0.00064274	not_sig	105	152	75	28	131	169	60	0
chr2_69423598_G_A_b38	698	16	688	30	1.90225	0.0503038	823	0.000643522	not_sig	341	16	0	3	329	30	0	1
chr9_92714159_C_G_b38	526	194	559	161	0.780905	0.0503046	824	0.000644304	not_sig	194	138	28	0	210	139	11	0
chrX_70927809_A_G_b38	691	27	671	43	1.64006	0.0503074	825	0.000645086	not_sig	340	11	8	1	323	25	9	3
chr2_98555780_C_T_b38	652	40	659	61	1.5088	0.0504665	826	0.000645868	not_sig	307	38	1	14	303	53	4	0
chr9_136362959_T_C_b38	363	351	328	392	1.23598	0.0504958	827	0.000646649	not_sig	98	167	92	3	76	176	108	0
chr19_56574632_A_G_b38	703	15	714	6	0.393838	0.0505463	828	0.000647431	not_sig	344	15	0	1	354	6	0	0
chr1_26921784_C_T_b38	712	6	702	16	2.70465	0.0507	829	0.000648213	not_sig	353	6	0	1	343	16	0	1
chr7_99493976_C_T_b38	704	16	714	6	0.369748	0.050705	830	0.000648995	not_sig	345	14	1	0	354	6	0	0
chr2_61089064_CTT_C_b38	704	6	700	16	2.6819	0.0507326	831	0.000649777	not_sig	349	6	0	5	342	16	0	2
chr19_2820107_G_A_b38	459	221	491	187	0.791007	0.0508583	832	0.000650559	not_sig	149	161	30	20	177	137	25	21
chr16_30992848_T_C_b38	516	200	483	235	1.25528	0.0508817	833	0.000651341	not_sig	179	158	21	2	161	161	37	1
chr17_41381932_G_C_b38	688	16	690	30	1.86957	0.0509252	834	0.000652123	not_sig	336	16	0	8	330	30	0	0
chr1_155212373_C_T_b38	326	394	364	356	0.809226	0.0509281	835	0.000652905	not_sig	69	188	103	0	96	172	92	0
chr14_94100686_C_T_b38	375	343	338	382	1.23562	0.0509603	836	0.000653687	not_sig	96	183	80	1	81	176	103	0
chr11_65129981_C_T_b38	374	346	336	384	1.23534	0.0511075	837	0.000654469	not_sig	96	182	82	0	72	192	96	0
chr2_74505288_T_G_b38	592	128	620	100	0.745968	0.0511177	838	0.000655251	not_sig	239	114	7	0	266	88	6	0
chr19_55486895_C_T_b38	572	148	539	179	1.28351	0.0511707	839	0.000656033	not_sig	227	118	15	0	200	139	20	1
chr2_238098238_C_T_b38	586	134	555	165	1.30012	0.0511728	840	0.000656814	not_sig	238	110	12	0	216	123	21	0
chr11_94021342_G_A_b38	137	553	114	606	1.31693	0.0513018	841	0.000657596	not_sig	21	95	229	15	13	88	259	0
chr14_104884018_A_G_b38	202	518	236	482	0.796447	0.0513909	842	0.000658378	not_sig	30	142	188	0	47	142	170	1
chr22_50217680_A_C_b38	624	30	669	51	1.58565	0.0518384	843	0.00065916	not_sig	298	28	1	33	311	47	2	0
chr17_4088649_A_G_b38	619	101	591	129	1.33774	0.0519479	844	0.000659942	not_sig	264	91	5	0	243	105	12	0
chr1_66924785_C_G_b38	198	522	165	555	1.27586	0.0520389	845	0.000660724	not_sig	25	148	187	0	24	117	219	0
chr16_737738_G_C_b38	567	153	597	123	0.763523	0.0520614	846	0.000661506	not_sig	223	121	16	0	253	91	16	0
chr19_619913_T_C_b38	597	123	567	153	1.30972	0.0520614	847	0.000662288	not_sig	248	101	11	0	225	117	18	0
chr3_39280219_C_T_b38	653	67	629	91	1.41003	0.0521958	848	0.00066307	not_sig	300	53	7	0	276	77	7	0
chr20_45882988_C_T_b38	653	67	629	91	1.41003	0.0521958	849	0.000663852	not_sig	295	63	2	0	275	79	6	0
chr5_141174608_G_C_b38	403	305	447	273	0.806975	0.0522308	850	0.000664634	not_sig	110	183	61	6	139	169	52	0
chr19_58118469_G_GCGGGGC_b38	618	82	608	110	1.36353	0.0522388	851	0.000665416	not_sig	275	68	7	10	262	84	13	1
chr12_2827110_A_G_b38	608	112	579	141	1.32198	0.0523671	852	0.000666198	not_sig	256	96	8	0	234	111	15	0
chr12_47784682_T_C_b38	150	568	182	538	0.780645	0.0523824	853	0.000666979	not_sig	18	114	227	1	30	122	208	0
chr19_45884086_G_A_b38	637	83	611	109	1.36914	0.0524044	854	0.000667761	not_sig	279	79	2	0	256	99	5	0
chr9_19380241_A_T_b38	584	66	669	51	0.674548	0.0524849	855	0.000668543	not_sig	262	60	3	35	310	49	1	0
chr19_34958505_G_A_b38	513	207	474	240	1.25482	0.0525172	856	0.000669325	not_sig	187	139	34	0	158	158	41	3
chr17_44321389_C_A_b38	415	305	452	268	0.80676	0.0525555	857	0.000670107	not_sig	118	179	63	0	134	184	42	0
chr14_77306256_G_A_b38	678	42	658	62	1.52106	0.0526295	858	0.000670889	not_sig	321	36	3	0	300	58	2	0
chr1_151001835_G_A_b38	610	54	681	39	0.646924	0.0526642	859	0.000671671	not_sig	281	48	3	28	323	35	2	0
chr16_3025700_C_T_b38	486	232	452	268	1.24207	0.0527412	860	0.000672453	not_sig	163	160	36	1	134	184	42	0
chr12_8946399_G_GAAC_b38	643	67	628	92	1.40593	0.0527546	861	0.000673235	not_sig	294	55	6	5	273	82	5	0
chr1_27914572_G_A_b38	683	37	663	55	1.53133	0.0529441	862	0.000674017	not_sig	324	35	1	0	305	53	1	1
chr9_120869767_A_G_b38	207	513	242	478	0.797013	0.0530266	863	0.000674799	not_sig	34	139	187	0	32	178	150	0
chr1_111197149_G_GCAGGACAAA_b38	405	309	445	275	0.809971	0.0530622	864	0.000675581	not_sig	116	173	68	3	137	171	52	0
chr11_679915_G_A_b38	348	326	409	311	0.811706	0.0530768	865	0.000676362	not_sig	91	166	80	23	114	181	65	0
chr6_31928196_C_G_b38	526	138	600	120	0.762319	0.0531286	866	0.000677144	not_sig	217	92	23	28	247	106	7	0
chr20_62337627_T_C_b38	69	651	48	672	1.48387	0.053334	867	0.000677926	not_sig	2	65	293	0	1	46	313	0
chr6_32830032_C_T_b38	651	69	672	48	0.673913	0.053334	868	0.000678708	not_sig	293	65	2	0	314	44	2	0
chr19_22316140_G_C_b38	717	3	692	10	3.45376	0.0534961	869	0.00067949	not_sig	357	3	0	0	342	8	1	9
chr9_34623721_G_A_b38	589	131	615	103	0.753019	0.0536369	870	0.000680272	not_sig	238	113	9	0	262	91	6	1
chr15_55340661_G_T_b38	471	245	504	210	0.80102	0.0536566	871	0.000681054	not_sig	155	161	42	2	176	152	29	3
chr3_183651103_C_T_b38	496	222	528	188	0.795523	0.0538398	872	0.000681836	not_sig	167	162	30	1	193	142	23	2
chr6_39934461_C_T_b38	646	18	709	9	0.455571	0.0539156	873	0.000682618	not_sig	314	18	0	28	350	9	0	1
chr4_24800327_C_T_b38	276	434	242	472	1.24035	0.0539192	874	0.0006834	not_sig	57	162	136	5	42	158	157	3
chr1_151775323_G_A_b38	210	490	251	469	0.800797	0.0539996	875	0.000684182	not_sig	36	138	176	10	43	165	152	0
chr22_50032087_C_T_b38	587	113	575	145	1.30997	0.0540362	876	0.000684964	not_sig	244	99	7	10	227	121	12	0
chr3_125982256_T_C_b38	551	155	592	128	0.768614	0.0540576	877	0.000685746	not_sig	222	107	24	7	245	102	13	0
chr11_62611329_T_C_b38	481	239	445	275	1.24371	0.0541608	878	0.000686527	not_sig	160	161	39	0	132	181	47	0
chr13_102821147_T_G_b38	489	165	570	150	0.779904	0.0541811	879	0.000687309	not_sig	179	131	17	33	225	120	15	0
chr22_21628971_A_G_b38	563	157	588	126	0.768426	0.0542245	880	0.000688091	not_sig	219	125	16	0	239	110	8	3
chr4_8216102_C_A_b38	480	240	444	276	1.24324	0.0543685	881	0.000688873	not_sig	159	162	39	0	141	162	57	0
chr14_104773557_C_T_b38	525	185	564	156	0.784934	0.054467	882	0.000689655	not_sig	192	141	22	5	220	124	16	0
chr6_154406691_C_T_b38	370	330	418	302	0.810062	0.0545052	883	0.000690437	not_sig	92	186	72	10	123	172	65	0
chr12_8867893_A_G_b38	143	569	116	604	1.30859	0.0545917	884	0.000691219	not_sig	14	115	227	4	9	98	253	0
chr6_31410610_T_C_b38	530	190	496	224	1.25976	0.0546084	885	0.000692001	not_sig	203	124	33	0	166	164	30	0
chr6_31410648_A_G_b38	530	190	496	224	1.25976	0.0546084	886	0.000692783	not_sig	203	124	33	0	166	164	30	0
chr3_52603470_C_G_b38	324	382	294	426	1.22898	0.0546259	887	0.000693565	not_sig	75	174	104	7	62	170	128	0
chr14_94382814_G_A_b38	697	23	709	11	0.470166	0.0546975	888	0.000694347	not_sig	337	23	0	0	349	11	0	0
chr22_23580365_G_A_b38	571	81	654	66	0.711406	0.0547069	889	0.000695129	not_sig	247	77	2	34	297	60	3	0
chr16_559769_G_C_b38	635	15	713	7	0.415615	0.0547351	890	0.000695911	not_sig	310	15	0	35	353	7	0	0
chrX_154349931_A_G_b38	612	68	613	95	1.39478	0.0549186	891	0.000696692	not_sig	286	40	14	20	284	45	25	6
chr7_102473977_T_G_b38	225	495	191	529	1.25892	0.0549567	892	0.000697474	not_sig	40	145	175	0	28	135	197	0
chr2_130181775_G_A_b38	477	243	441	279	1.24187	0.0549804	893	0.000698256	not_sig	160	157	43	0	140	161	59	0
chr12_51243385_C_T_b38	618	102	643	77	0.725551	0.0550119	894	0.000699038	not_sig	263	92	5	0	288	67	5	0
chr17_3664718_A_G_b38	85	635	62	658	1.42062	0.0552064	895	0.00069982	not_sig	1	83	276	0	2	58	300	0
chr19_3155738_T_C_b38	467	249	504	216	0.803787	0.0553154	896	0.000700602	not_sig	155	157	46	2	177	150	33	0
chr9_122375240_A_C_b38	676	4	720	0	0	0.0554048	897	0.000701384	not_sig	336	4	0	20	360	0	0	0
chr16_75114706_G_A_b38	206	514	173	547	1.2672	0.0554196	898	0.000702166	not_sig	32	142	186	0	23	127	210	0
chr1_155061442_C_T_b38	573	127	559	161	1.29947	0.0554864	899	0.000702948	not_sig	233	107	10	10	214	131	15	0
chr19_4180693_T_G_b38	104	594	135	585	0.758698	0.0555676	900	0.00070373	not_sig	9	86	254	11	17	101	242	0
chr11_65088636_A_C_b38	388	332	425	295	0.811198	0.0556573	901	0.000704512	not_sig	103	182	75	0	121	183	56	0
chr17_40022374_A_G_b38	466	248	433	285	1.23678	0.0557403	902	0.000705294	not_sig	151	164	42	3	133	167	59	1
chrX_23907717_A_T_b38	575	91	637	73	0.724119	0.0557724	903	0.000706076	not_sig	272	31	30	27	301	35	19	5
chr17_410391_T_C_b38	544	174	513	207	1.26154	0.0558949	904	0.000706857	not_sig	203	138	18	1	183	147	30	0
chr11_65947454_C_T_b38	693	27	704	14	0.510417	0.0559979	905	0.000707639	not_sig	333	27	0	0	346	12	1	1
chr19_42402119_G_C_b38	604	60	632	88	1.40169	0.0560706	906	0.000708421	not_sig	277	50	5	28	276	80	4	0
chr16_89646481_C_T_b38	411	303	378	342	1.22725	0.0561332	907	0.000709203	not_sig	112	187	58	3	93	192	75	0
chr22_46913351_C_T_b38	650	70	626	94	1.39434	0.0561397	908	0.000709985	not_sig	294	62	4	0	275	76	9	0
chr7_30752045_T_C_b38	705	3	709	11	3.64598	0.0562972	909	0.000710767	not_sig	351	3	0	6	349	11	0	0
chr12_6730747_C_T_b38	662	56	642	78	1.43625	0.0564738	910	0.000711549	not_sig	304	54	1	1	287	68	5	0
chr3_184344988_A_G_b38	443	253	493	227	0.806236	0.0564922	911	0.000712331	not_sig	127	189	32	12	168	157	35	0
chr4_76586508_A_C_b38	569	93	591	129	1.33546	0.0564935	912	0.000713113	not_sig	241	87	3	29	244	103	13	0
chr12_8230699_C_A_b38	118	602	146	572	0.767942	0.0565827	913	0.000713895	not_sig	2	114	244	0	12	122	225	1
chr17_44315254_T_C_b38	430	290	462	252	0.808777	0.0566055	914	0.000714677	not_sig	125	180	55	0	142	178	37	3
chr1_113881031_C_T_b38	501	195	484	236	1.25277	0.0566061	915	0.000715459	not_sig	176	149	23	12	160	164	36	0
chr3_12540093_C_T_b38	587	111	631	89	0.745892	0.0568213	916	0.000716241	not_sig	250	87	12	11	273	85	2	0
chr19_57875283_C_A_b38	509	209	543	177	0.793862	0.0568905	917	0.000717022	not_sig	180	149	30	1	208	127	25	0
chr21_44851545_T_C_b38	656	56	642	78	1.42323	0.0569534	918	0.000717804	not_sig	302	52	2	4	290	62	8	0
chr17_39864166_T_C_b38	331	377	373	347	0.816784	0.0569582	919	0.000718586	not_sig	82	167	105	6	93	187	80	0
chr7_151022984_G_A_b38	579	111	630	90	0.745174	0.0569938	920	0.000719368	not_sig	242	95	8	15	275	80	5	0
chr1_1219858_G_A_b38	596	124	621	97	0.750766	0.0571709	921	0.00072015	not_sig	240	116	4	0	264	93	2	1
chr2_230185999_A_G_b38	79	641	104	616	0.729989	0.0573524	922	0.000720932	not_sig	7	65	288	0	9	86	265	0
chr20_45877334_T_C_b38	291	429	255	463	1.23162	0.0573597	923	0.000721714	not_sig	50	191	119	0	47	161	151	1
chr13_24302614_T_C_b38	497	223	462	258	1.2446	0.0574201	924	0.000722496	not_sig	169	159	32	0	149	164	47	0
chr11_102713876_T_C_b38	264	416	316	404	0.811344	0.0575466	925	0.000723278	not_sig	42	180	118	20	77	162	121	0
chr7_102473107_C_T_b38	661	17	675	31	1.78571	0.0575572	926	0.00072406	not_sig	322	17	0	21	324	27	2	7
chr2_17781726_CAAGTT_C_b38	648	72	614	94	1.37785	0.0576228	927	0.000724842	not_sig	290	68	2	0	268	78	8	6
chr16_81101255_C_G_b38	654	24	679	41	1.64543	0.0576647	928	0.000725624	not_sig	315	24	0	21	320	39	1	0
chr5_140967127_T_C_b38	461	259	496	224	0.803836	0.0576779	929	0.000726406	not_sig	145	171	44	0	168	160	32	0
chr3_184178853_T_C_b38	385	335	348	372	1.22851	0.0577011	930	0.000727187	not_sig	105	175	80	0	92	164	104	0
chr2_131482936_C_A_b38	466	208	531	189	0.797425	0.0577045	931	0.000727969	not_sig	158	150	29	23	195	141	24	0
chr6_145804330_T_G_b38	345	315	411	305	0.812768	0.0578811	932	0.000728751	not_sig	86	173	71	30	117	177	64	2
chrX_72186451_T_C_b38	519	199	530	160	0.787333	0.0578957	933	0.000729533	not_sig	225	69	65	1	232	66	47	15
chr17_78500279_C_G_b38	425	295	461	259	0.809405	0.0579491	934	0.000730315	not_sig	129	167	64	0	148	165	47	0
chr22_36236597_T_G_b38	695	25	679	41	1.67865	0.057979	935	0.000731097	not_sig	335	25	0	0	321	37	2	0
chrX_152914462_G_C_b38	477	179	482	228	1.26053	0.058083	936	0.000731879	not_sig	200	77	51	32	197	88	70	5
chr17_43801706_T_C_b38	641	79	663	57	0.697577	0.0581217	937	0.000732661	not_sig	285	71	4	0	308	47	5	0
chr1_152565882_G_C_b38	526	194	558	162	0.787163	0.0581801	938	0.000733443	not_sig	193	140	27	0	214	130	16	0
chr2_219172944_A_G_b38	262	458	297	421	0.810889	0.0582744	939	0.000734225	not_sig	59	144	157	0	63	171	125	1
chr3_46612642_G_A_b38	137	583	109	611	1.31725	0.058539	940	0.000735007	not_sig	9	119	232	0	5	99	256	0
chr17_7559238_G_A_b38	623	95	648	72	0.728655	0.0585924	941	0.000735789	not_sig	270	83	6	1	291	66	3	0
chr14_24249309_G_A_b38	89	631	115	605	0.742024	0.0586572	942	0.00073657	not_sig	10	69	281	0	10	95	255	0
chr1_161210087_G_A_b38	546	162	585	135	0.777778	0.0586586	943	0.000737352	not_sig	211	124	19	6	239	107	14	0
chr1_1213065_G_A_b38	711	9	700	20	2.25714	0.0588441	944	0.000738134	not_sig	351	9	0	0	340	20	0	0
chr12_132604155_C_T_b38	711	9	700	20	2.25714	0.0588441	945	0.000738916	not_sig	351	9	0	0	340	20	0	0
chr20_62671994_C_T_b38	700	20	711	9	0.443038	0.0588441	946	0.000739698	not_sig	340	20	0	0	351	9	0	0
chr22_20586535_C_T_b38	711	9	700	20	2.25714	0.0588441	947	0.00074048	not_sig	351	9	0	0	340	20	0	0
chrX_154405018_C_G_b38	647	73	613	95	1.37355	0.0589164	948	0.000741262	not_sig	305	37	18	0	284	45	25	6
chr7_98961257_G_C_b38	45	675	65	655	0.671795	0.0590074	949	0.000742044	not_sig	0	45	315	0	2	61	297	0
chr8_143291472_G_A_b38	655	65	675	45	0.671795	0.0590074	950	0.000742826	not_sig	297	61	2	0	315	45	0	0
chr17_81511844_C_A_b38	541	179	572	148	0.782006	0.0590535	951	0.000743608	not_sig	204	133	23	0	227	118	15	0
chr21_33266554_G_A_b38	236	474	206	514	1.24231	0.0592467	952	0.00074439	not_sig	33	170	152	5	34	138	188	0
chr6_34836170_C_T_b38	454	266	489	231	0.806264	0.0594263	953	0.000745172	not_sig	138	178	44	0	165	159	36	0
chr16_2798428_A_C_b38	454	266	489	231	0.806264	0.0594263	954	0.000745954	not_sig	139	176	45	0	163	163	34	0
chr2_94876688_C_G_b38	659	35	698	22	0.593451	0.0595667	955	0.000746735	not_sig	312	35	0	13	338	22	0	0
chr19_21637961_C_T_b38	513	205	481	239	1.24342	0.0597021	956	0.000747517	not_sig	186	141	32	1	166	149	45	0
chr12_165481_T_C_b38	478	238	514	206	0.804924	0.0597059	957	0.000748299	not_sig	159	160	39	2	180	154	26	0
chr11_62884591_A_G_b38	80	640	58	662	1.42672	0.0597877	958	0.000749081	not_sig	4	72	284	0	3	52	305	0
chr7_143960380_A_G_b38	640	80	662	58	0.700906	0.0597877	959	0.000749863	not_sig	285	70	5	0	305	52	3	0
chr7_75437428_A_T_b38	702	4	720	0	0	0.0598236	960	0.000750645	not_sig	349	4	0	7	360	0	0	0
chr9_114002003_C_T_b38	481	233	450	270	1.23863	0.0598591	961	0.000751427	not_sig	165	151	41	3	139	172	49	0
chr9_115073620_C_T_b38	620	100	593	127	1.32782	0.0599061	962	0.000752209	not_sig	265	90	5	0	240	113	7	0
chr21_43028665_G_A_b38	443	273	410	310	1.22693	0.0601025	963	0.000752991	not_sig	138	167	53	2	125	160	75	0
chr16_67201769_C_T_b38	690	30	673	47	1.60624	0.060275	964	0.000753773	not_sig	331	28	1	0	315	43	2	0
chr1_153940147_G_A_b38	661	59	680	40	0.659023	0.0603642	965	0.000754555	not_sig	303	55	2	0	322	36	2	0
chr19_10579881_G_C_b38	52	662	35	683	1.53284	0.0603761	966	0.000755337	not_sig	2	48	307	3	1	33	325	1
chr18_45749754_G_A_b38	661	59	678	40	0.660967	0.0603774	967	0.000756119	not_sig	306	49	5	0	320	38	1	1
chr19_48446509_C_G_b38	73	641	97	623	0.731444	0.0604408	968	0.0007569	not_sig	3	67	287	3	9	79	272	0
chrX_153670532_G_A_b38	711	7	694	16	2.3417	0.0605162	969	0.000757682	not_sig	355	1	3	1	343	8	4	5
chr15_84790722_A_G_b38	199	521	167	553	1.26481	0.0605299	970	0.000758464	not_sig	31	137	192	0	25	117	218	0
chr1_26255600_G_A_b38	478	242	510	208	0.805574	0.0606518	971	0.000759246	not_sig	164	150	46	0	182	146	31	1
chr2_74460423_T_C_b38	592	128	619	101	0.754645	0.0608245	972	0.000760028	not_sig	239	114	7	0	265	89	6	0
chr15_30608420_G_T_b38	713	7	698	16	2.33483	0.0608557	973	0.00076081	not_sig	353	7	0	0	341	16	0	3
chr6_36970022_G_A_b38	708	4	720	0	0	0.060856	974	0.000761592	not_sig	352	4	0	4	360	0	0	0
chr1_23424647_G_T_b38	209	507	244	476	0.804184	0.0608991	975	0.000762374	not_sig	29	151	178	2	35	174	151	0
chr9_133344393_A_G_b38	344	338	400	320	0.814201	0.0609415	976	0.000763156	not_sig	87	170	84	19	116	168	76	0
chr14_39431468_T_C_b38	520	200	552	168	0.791304	0.0609933	977	0.000763938	not_sig	183	154	23	0	214	124	22	0
chr17_47946328_G_A_b38	652	66	672	46	0.676227	0.0611103	978	0.00076472	not_sig	297	58	4	1	314	44	1	1
chr19_581633_G_A_b38	603	87	652	68	0.722869	0.0611952	979	0.000765502	not_sig	262	79	4	15	298	56	6	0
chr1_44220650_T_C_b38	471	219	525	195	0.798826	0.0611996	980	0.000766284	not_sig	155	161	29	15	185	155	20	0
chr21_37493205_C_G_b38	491	165	506	214	1.25852	0.0612111	981	0.000767065	not_sig	186	119	23	32	177	152	31	0
chr15_52244399_C_T_b38	701	13	713	5	0.378142	0.061308	982	0.000767847	not_sig	344	13	0	3	354	5	0	1
chr16_89640584_C_T_b38	499	199	545	173	0.795971	0.0613823	983	0.000768629	not_sig	170	159	20	11	205	135	19	1
chr8_18804694_C_A_b38	661	59	639	81	1.42015	0.0614537	984	0.000769411	not_sig	304	53	3	0	283	73	4	0
chr9_110430375_T_G_b38	576	140	605	113	0.768453	0.0615319	985	0.000770193	not_sig	233	110	15	2	257	91	11	1
chr17_18150908_G_A_b38	712	4	720	0	0	0.0615467	986	0.000770975	not_sig	354	4	0	2	360	0	0	0
chr10_102402210_T_C_b38	274	440	242	478	1.23002	0.0616101	987	0.000771757	not_sig	55	164	138	3	43	156	161	0
chr4_22455855_C_T_b38	188	520	224	496	0.800549	0.0616318	988	0.000772539	not_sig	22	144	188	6	26	172	162	0
chr14_104108552_G_A_b38	703	17	713	7	0.40599	0.0617268	989	0.000773321	not_sig	343	17	0	0	353	7	0	0
chr9_137575667_A_G_b38	536	184	567	153	0.786059	0.0617716	990	0.000774103	not_sig	202	132	26	0	225	117	18	0
chr20_43702817_A_G_b38	664	46	654	66	1.45672	0.0618312	991	0.000774885	not_sig	311	42	2	5	298	58	4	0
chr1_44645152_T_C_b38	713	5	706	14	2.82776	0.061848	992	0.000775667	not_sig	354	5	0	1	346	14	0	0
chr10_133272758_C_G_b38	696	24	708	12	0.491525	0.0619148	993	0.000776449	not_sig	336	24	0	0	348	12	0	0
chr10_15103949_T_C_b38	708	12	696	24	2.03448	0.0619148	994	0.00077723	not_sig	348	12	0	0	336	24	0	0
chr17_76725439_T_G_b38	708	0	707	5	inf	0.062065	995	0.000778012	not_sig	354	0	0	6	351	5	0	4
chr20_3674341_A_C_b38	715	5	720	0	0	0.0620661	996	0.000778794	not_sig	355	5	0	0	360	0	0	0
chr7_100633241_G_C_b38	715	5	720	0	0	0.0620661	997	0.000779576	not_sig	355	5	0	0	360	0	0	0
chr19_46652904_A_G_b38	715	5	716	0	0	0.0620698	998	0.000780358	not_sig	355	5	0	0	358	0	0	2
chrX_154489674_T_C_b38	713	5	710	0	0	0.0620821	999	0.00078114	not_sig	355	3	1	1	355	0	0	5
chr4_1383827_A_G_b38	190	530	223	497	0.798968	0.0621756	1000	0.000781922	not_sig	31	128	201	0	30	163	167	0
chr2_32597890_G_A_b38	379	329	421	299	0.818149	0.0621887	1001	0.000782704	not_sig	110	159	85	6	124	173	63	0
chr11_128480393_G_A_b38	697	5	706	14	2.76431	0.0622204	1002	0.000783486	not_sig	346	5	0	9	346	14	0	0
chr10_49472987_G_A_b38	394	326	430	290	0.815095	0.0622513	1003	0.000784268	not_sig	107	180	73	0	123	184	53	0
chr21_41744072_C_A_b38	395	325	429	289	0.818756	0.0622782	1004	0.00078505	not_sig	107	181	72	0	125	179	55	1
chr11_17393643_C_G_b38	278	438	245	475	1.23055	0.0623126	1005	0.000785832	not_sig	61	156	141	2	41	163	156	0
chr16_31130950_A_G_b38	502	214	471	249	1.24013	0.0624181	1006	0.000786613	not_sig	177	148	33	2	149	173	38	0
chr22_20990303_A_C_b38	332	362	381	339	0.816026	0.0625799	1007	0.000787395	not_sig	76	180	91	13	91	199	70	0
chr7_37920660_AAGGCAGTGGCAGC_A_b38	475	245	440	280	1.23377	0.0626201	1008	0.000788177	not_sig	161	153	46	0	136	168	56	0
chr2_173221944_G_A_b38	604	114	578	142	1.30165	0.062638	1009	0.000788959	not_sig	256	92	11	1	233	112	15	0
chr13_19177089_T_C_b38	659	53	684	36	0.654419	0.0626417	1010	0.000789741	not_sig	304	51	1	4	325	34	1	0
chr9_37780834_A_G_b38	610	72	665	55	0.70071	0.0626535	1011	0.000790523	not_sig	272	66	3	19	306	53	1	0
chr4_185445027_G_A_b38	667	53	646	74	1.44161	0.062735	1012	0.000791305	not_sig	311	45	4	0	288	70	2	0
chr5_80141506_G_A_b38	295	425	331	389	0.815746	0.0627625	1013	0.000792087	not_sig	67	161	132	0	75	181	104	0
chr16_30001370_C_T_b38	660	60	679	41	0.664212	0.0627925	1014	0.000792869	not_sig	300	60	0	0	320	39	1	0
chr1_1197586_C_A_b38	624	90	641	67	0.724701	0.0628027	1015	0.000793651	not_sig	270	84	3	3	290	61	3	6
chr9_39118111_C_T_b38	590	130	613	103	0.76258	0.0628672	1016	0.000794433	not_sig	244	102	14	0	262	89	7	2
chr1_13583922_C_T_b38	504	216	470	250	1.24113	0.0630028	1017	0.000795215	not_sig	174	156	30	0	149	172	39	0
chr21_14226823_T_C_b38	418	302	380	336	1.22384	0.0630331	1018	0.000795997	not_sig	122	174	64	0	106	168	84	2
chr7_151028885_C_T_b38	567	129	614	106	0.758806	0.0630916	1019	0.000796778	not_sig	231	105	12	12	261	92	7	0
chr17_7929448_A_G_b38	375	345	405	305	0.818572	0.0631211	1020	0.00079756	not_sig	100	175	85	0	113	179	63	5
chr4_109870205_G_A_b38	611	109	636	84	0.74035	0.0631806	1021	0.000798342	not_sig	263	85	12	0	284	68	8	0
chr3_49684923_G_A_b38	537	173	510	206	1.25379	0.0632036	1022	0.000799124	not_sig	186	165	4	5	185	140	33	2
chr17_17215128_T_C_b38	515	205	547	173	0.794533	0.063277	1023	0.000799906	not_sig	187	141	32	0	209	129	22	0
chr19_45499810_A_G_b38	577	143	605	115	0.766977	0.0634037	1024	0.000800688	not_sig	228	121	11	0	252	101	7	0
chr1_230752680_A_T_b38	473	225	521	199	0.80296	0.0634132	1025	0.00080147	not_sig	163	147	39	11	195	131	34	0
chr11_44074688_G_A_b38	172	524	210	510	0.797165	0.0634286	1026	0.000802252	not_sig	18	136	194	12	27	156	177	0
chr12_52646673_C_T_b38	679	5	706	14	2.69292	0.0634297	1027	0.000803034	not_sig	337	5	0	18	347	12	1	0
chr2_219182253_C_A_b38	249	471	284	436	0.811609	0.0634572	1028	0.000803816	not_sig	50	149	161	0	58	168	134	0
chr4_56656480_A_G_b38	377	341	414	306	0.817162	0.0635222	1029	0.000804598	not_sig	100	177	82	1	114	186	60	0
chr16_11345822_C_G_b38	339	369	379	337	0.816891	0.0635458	1030	0.00080538	not_sig	77	185	92	6	100	179	79	2
chr3_46863322_G_A_b38	680	6	719	1	0.157626	0.0636065	1031	0.000806162	not_sig	337	6	0	17	359	1	0	0
chrX_91835436_C_T_b38	713	5	648	0	0	0.0636836	1032	0.000806943	not_sig	355	3	1	1	324	0	0	36
chr16_31183958_C_T_b38	306	414	342	378	0.816934	0.0637067	1033	0.000807725	not_sig	55	196	109	0	75	192	93	0
chr1_206584745_A_T_b38	524	126	608	112	0.766082	0.0637095	1034	0.000808507	not_sig	206	112	7	35	257	94	9	0
chr19_13214415_G_C_b38	654	18	685	33	1.75036	0.0637742	1035	0.000809289	not_sig	318	18	0	24	326	33	0	1
chr1_230762748_C_T_b38	409	289	457	263	0.814451	0.0640553	1036	0.000810071	not_sig	119	171	59	11	148	161	51	0
chr14_91813693_T_C_b38	328	372	279	389	1.22935	0.0641758	1037	0.000810853	not_sig	72	184	94	10	55	169	110	26
chr11_74164271_C_T_b38	436	226	508	212	0.805101	0.0641811	1038	0.000811635	not_sig	143	150	38	29	174	160	26	0
chr12_52304976_T_C_b38	710	8	718	2	0.247214	0.0642415	1039	0.000812417	not_sig	351	8	0	1	358	2	0	0
chr7_151341801_C_T_b38	631	85	608	110	1.34307	0.0643117	1040	0.000813199	not_sig	277	77	4	2	258	92	9	1
chr22_46679040_T_C_b38	367	353	403	317	0.817797	0.0644016	1041	0.000813981	not_sig	93	181	86	0	110	183	67	0
chr14_53950804_A_G_b38	315	403	351	369	0.821722	0.0644536	1042	0.000814763	not_sig	70	175	114	1	85	181	94	0
chr11_64259213_C_T_b38	499	195	485	235	1.23992	0.0645862	1043	0.000815545	not_sig	179	141	27	13	163	159	38	0
chr6_71289648_C_T_b38	647	67	672	48	0.689765	0.0646347	1044	0.000816327	not_sig	291	65	1	3	312	48	0	0
chr8_144512433_C_T_b38	362	358	398	322	0.818085	0.0646347	1045	0.000817108	not_sig	93	176	91	0	112	174	74	0
chr21_46219578_C_G_b38	291	419	260	460	1.22875	0.0646356	1046	0.00081789	not_sig	68	155	132	5	45	170	145	0
chr22_19963748_G_A_b38	372	344	338	382	1.22217	0.064659	1047	0.000818672	not_sig	90	192	76	2	75	188	97	0
chr1_205842700_A_T_b38	606	110	634	86	0.74729	0.0650239	1048	0.000819454	not_sig	256	94	8	2	283	68	9	0
chr2_58159865_C_T_b38	504	214	518	176	0.800202	0.0650946	1049	0.000820236	not_sig	168	168	23	1	198	122	27	13
chr17_7343621_T_G_b38	293	427	258	462	1.22875	0.065216	1050	0.000821018	not_sig	60	173	127	0	49	160	151	0
chr19_1230678_G_A_b38	560	160	528	190	1.25947	0.0652932	1051	0.0008218	not_sig	221	118	21	0	196	136	27	1
chr16_85918709_C_T_b38	682	2	711	9	4.31646	0.0653493	1052	0.000822582	not_sig	340	2	0	18	351	9	0	0
chr9_137216103_G_A_b38	693	27	677	43	1.63023	0.0653535	1053	0.000823364	not_sig	333	27	0	0	320	37	3	0
chr20_62334004_A_G_b38	68	652	48	672	1.46012	0.0654104	1054	0.000824146	not_sig	2	64	294	0	1	46	313	0
chr20_62330822_A_G_b38	68	652	48	672	1.46012	0.0654104	1055	0.000824928	not_sig	2	64	294	0	1	46	313	0
chr8_124539123_A_G_b38	634	86	609	111	1.34368	0.0654982	1056	0.00082571	not_sig	279	76	5	0	259	91	10	0
chr1_34785628_G_A_b38	340	318	408	312	0.81761	0.0658326	1057	0.000826492	not_sig	90	160	79	31	117	174	69	0
chr1_1287315_G_C_b38	679	37	695	23	0.607311	0.0659754	1058	0.000827273	not_sig	324	31	3	2	338	19	2	1
chr14_49598999_G_C_b38	161	559	192	528	0.792039	0.066001	1059	0.000828055	not_sig	21	119	220	0	28	136	196	0
chr1_204619938_C_T_b38	658	62	636	84	1.4017	0.0664458	1060	0.000828837	not_sig	300	58	2	0	280	76	4	0
chr12_48918810_A_G_b38	455	265	420	300	1.22642	0.0664639	1061	0.000829619	not_sig	154	147	59	0	115	190	55	0
chr11_64792426_T_C_b38	462	210	528	192	0.8	0.0665223	1062	0.000830401	not_sig	154	154	28	24	199	130	31	0
chr15_70076093_T_C_b38	544	176	574	146	0.786189	0.0665317	1063	0.000831183	not_sig	209	126	25	0	230	114	16	0
chr5_178964859_G_A_b38	518	202	485	235	1.24252	0.0665641	1064	0.000831965	not_sig	188	142	30	0	169	147	44	0
chr15_40856001_C_T_b38	119	601	147	573	0.771809	0.0665994	1065	0.000832747	not_sig	6	107	247	0	8	131	221	0
chr9_127909942_C_T_b38	49	671	32	688	1.57004	0.0666596	1066	0.000833529	not_sig	1	47	312	0	0	32	328	0
chr11_18013045_G_C_b38	275	431	311	399	0.818593	0.0667033	1067	0.000834311	not_sig	42	191	120	7	72	167	116	5
chr20_17968468_AAAG_A_b38	660	2	709	9	4.189	0.066765	1068	0.000835093	not_sig	329	2	0	29	350	9	0	1
chr17_4555019_C_T_b38	160	554	133	587	1.27467	0.0669116	1069	0.000835875	not_sig	15	130	212	3	13	107	240	0
chr16_88703816_A_T_b38	416	304	451	269	0.816198	0.0671293	1070	0.000836657	not_sig	122	172	66	0	143	165	52	0
chr19_10359299_A_C_b38	576	90	646	74	0.733127	0.0672095	1071	0.000837438	not_sig	250	76	7	27	289	68	3	0
chr9_137754290_C_T_b38	634	54	643	77	1.40597	0.0672115	1072	0.00083822	not_sig	291	52	1	16	288	67	5	0
chr4_78317342_G_A_b38	514	204	483	237	1.23633	0.0673475	1073	0.000839002	not_sig	184	146	29	1	162	159	39	0
chr13_110449605_A_G_b38	444	234	437	283	1.22877	0.0674584	1074	0.000839784	not_sig	142	160	37	21	124	189	47	0
chr13_95947017_C_T_b38	435	275	405	313	1.22249	0.0675129	1075	0.000840566	not_sig	129	177	49	5	117	171	71	1
chr1_167697875_CA_C_b38	663	17	712	8	0.438202	0.0675979	1076	0.000841348	not_sig	324	15	1	20	352	8	0	0
chrX_155072276_TCAAA_T_b38	619	31	653	51	1.5595	0.0676362	1077	0.00084213	not_sig	302	15	8	35	315	23	14	8
chr9_136199675_G_A_b38	699	21	710	10	0.468813	0.0677482	1078	0.000842912	not_sig	339	21	0	0	351	8	1	0
chr8_143790170_G_A_b38	704	10	699	21	2.11502	0.0678113	1079	0.000843694	not_sig	347	10	0	3	339	21	0	0
chr19_14162829_A_G_b38	617	103	641	79	0.738273	0.0679217	1080	0.000844476	not_sig	264	89	7	0	284	73	3	0
chr11_62567436_G_C_b38	486	234	452	268	1.23145	0.0679622	1081	0.000845258	not_sig	164	158	38	0	137	178	45	0
chr8_94148874_G_A_b38	561	101	623	83	0.74	0.0680113	1082	0.00084604	not_sig	239	83	9	29	277	69	7	7
chr16_66549125_C_T_b38	691	29	704	16	0.541536	0.0680218	1083	0.000846821	not_sig	332	27	1	0	344	16	0	0
chr17_44006729_C_G_b38	380	316	428	292	0.820419	0.0680553	1084	0.000847603	not_sig	104	172	72	12	122	184	54	0
chr22_21938623_C_A_b38	323	349	382	338	0.818899	0.0681777	1085	0.000848385	not_sig	81	161	94	24	105	172	83	0
chrX_149930131_A_AAGT_b38	632	50	624	32	0.648205	0.0682031	1086	0.000849167	not_sig	304	24	13	19	303	18	7	32
chr19_34958856_G_C_b38	513	207	480	240	1.23913	0.0682947	1087	0.000849949	not_sig	187	139	34	0	161	158	41	0
chr7_100684915_G_A_b38	585	135	553	163	1.27728	0.0683514	1088	0.000850731	not_sig	239	107	14	0	219	115	24	2
chr11_6630579_A_G_b38	401	319	430	280	0.818546	0.0683671	1089	0.000851513	not_sig	111	179	70	0	133	164	58	5
chr12_132773034_C_G_b38	111	571	92	628	1.32696	0.0684357	1090	0.000852295	not_sig	10	91	240	19	2	88	270	0
chr3_187371024_C_T_b38	450	270	484	236	0.812672	0.0684684	1091	0.000853077	not_sig	144	162	54	0	158	168	34	0
chr11_77087958_T_C_b38	43	673	28	692	1.57907	0.0685045	1092	0.000853859	not_sig	1	41	316	2	0	28	332	0
chr2_74519195_A_T_b38	563	135	608	112	0.768226	0.0685238	1093	0.000854641	not_sig	224	115	10	11	254	100	6	0
chr7_44050305_A_G_b38	496	176	562	158	0.7923	0.0686077	1094	0.000855423	not_sig	175	146	15	24	223	116	21	0
chr16_53423_C_A_b38	164	556	135	585	1.27818	0.0687793	1095	0.000856205	not_sig	17	130	213	0	15	105	240	0
chr12_80444784_C_T_b38	697	21	684	10	0.485241	0.0689372	1096	0.000856986	not_sig	338	21	0	1	337	10	0	13
chr4_1380907_C_A_b38	209	511	242	478	0.807863	0.0689705	1097	0.000857768	not_sig	37	135	188	0	36	170	154	0
chr9_33524777_C_A_b38	371	279	446	274	0.816931	0.0690139	1098	0.00085855	not_sig	103	165	57	35	138	170	52	0
chr16_16090378_G_A_b38	692	28	676	44	1.60862	0.069054	1099	0.000859332	not_sig	333	26	1	0	317	42	1	0
chr3_119294867_C_A_b38	605	47	685	35	0.657711	0.0690971	1100	0.000860114	not_sig	282	41	3	34	325	35	0	0
chr2_121285174_A_T_b38	385	293	423	263	0.816974	0.0691914	1101	0.000860896	not_sig	102	181	56	21	125	173	45	17
chr5_141679591_C_G_b38	640	80	616	104	1.35065	0.0692198	1102	0.000861678	not_sig	282	76	2	0	264	88	8	0
chr4_67701173_TG_T_b38	422	268	378	294	1.22471	0.0693934	1103	0.00086246	not_sig	124	174	47	15	106	166	64	24
chr7_4783682_A_G_b38	713	7	719	1	0.141665	0.0695532	1104	0.000863242	not_sig	353	7	0	0	359	1	0	0
chr4_56821545_T_C_b38	639	49	686	34	0.646338	0.0696142	1105	0.000864024	not_sig	296	47	1	16	328	30	2	0
chr19_54277687_T_C_b38	123	555	104	614	1.30842	0.0696913	1106	0.000864806	not_sig	11	101	227	21	8	88	263	1
chr12_120153447_C_T_b38	136	580	165	555	0.788715	0.0697726	1107	0.000865588	not_sig	8	120	230	2	15	135	210	0
chr18_31132723_A_G_b38	563	101	633	85	0.748518	0.0698964	1108	0.00086637	not_sig	243	77	12	28	281	71	7	1
chr20_45304556_C_T_b38	568	152	537	181	1.25953	0.0699074	1109	0.000867151	not_sig	220	128	12	0	202	133	24	1
chr2_219169775_C_CCA_b38	607	111	582	138	1.29665	0.0699173	1110	0.000867933	not_sig	255	97	7	1	238	106	16	0
chr2_68157965_A_G_b38	242	478	276	444	0.814444	0.0699323	1111	0.000868715	not_sig	40	162	158	0	55	166	139	0
chr11_65115317_C_T_b38	390	328	426	294	0.820594	0.0703022	1112	0.000869497	not_sig	104	182	73	1	121	184	55	0
chr17_7857079_G_A_b38	615	105	639	81	0.742455	0.0705149	1113	0.000870279	not_sig	264	87	9	0	288	63	9	0
chr8_123651873_T_A_b38	615	105	639	81	0.742455	0.0705149	1114	0.000871061	not_sig	263	89	8	0	284	71	5	0
chr4_3520212_T_A_b38	454	246	500	220	0.812033	0.0705236	1115	0.000871843	not_sig	149	156	45	10	180	140	40	0
chr16_67199363_A_C_b38	391	329	424	294	0.824067	0.0706471	1116	0.000872625	not_sig	102	187	71	0	122	180	57	1
chr3_187371138_G_A_b38	112	608	139	581	0.769973	0.0707666	1117	0.000873407	not_sig	8	96	256	0	11	117	232	0
chr12_116911209_C_G_b38	117	603	90	616	1.32803	0.0709989	1118	0.000874189	not_sig	12	93	255	0	6	78	269	7
chr4_186191887_C_G_b38	383	319	357	361	1.21408	0.0710144	1119	0.000874971	not_sig	104	175	72	9	90	177	92	1
chr11_10806943_T_TA_b38	44	664	63	657	0.69105	0.0711296	1120	0.000875753	not_sig	3	38	313	6	2	59	299	0
chrX_154349351_A_G_b38	319	399	349	359	0.822407	0.0711746	1121	0.000876535	not_sig	114	91	154	1	134	81	139	6
chr4_56656054_A_G_b38	379	341	410	304	0.82409	0.0712555	1122	0.000877316	not_sig	101	177	82	0	112	186	59	3
chr8_91078345_G_C_b38	290	430	250	454	1.22474	0.0714234	1123	0.000878098	not_sig	54	182	124	0	47	156	149	8
chr6_99446002_T_C_b38	581	139	552	168	1.27213	0.0715013	1124	0.00087888	not_sig	234	113	13	0	209	134	17	0
chrX_103500623_T_A_b38	550	158	511	185	1.26025	0.0715625	1125	0.000879662	not_sig	243	64	47	6	218	75	55	12
chr19_57849960_G_C_b38	490	224	526	194	0.806797	0.0716053	1126	0.000880444	not_sig	170	150	37	3	201	124	35	0
chr17_4095905_C_T_b38	605	101	591	129	1.30748	0.0717338	1127	0.000881226	not_sig	257	91	5	7	243	105	12	0
chr12_120116998_C_T_b38	39	681	56	662	0.676998	0.0718221	1128	0.000882008	not_sig	1	37	322	0	5	46	308	1
chr3_36874323_T_G_b38	251	459	288	432	0.820261	0.071942	1129	0.00088279	not_sig	41	169	145	5	58	172	130	0
chr12_7097002_T_C_b38	469	251	435	285	1.22421	0.0719733	1130	0.000883572	not_sig	160	149	51	0	129	177	54	0
chr16_67174030_C_T_b38	663	57	681	39	0.666126	0.0720198	1131	0.000884354	not_sig	306	51	3	0	323	35	2	0
chr7_91264787_C_G_b38	304	354	294	418	1.22095	0.0720413	1132	0.000885136	not_sig	72	160	97	31	63	168	125	4
chr7_101217355_T_C_b38	488	182	555	165	0.797149	0.0721763	1133	0.000885918	not_sig	173	142	20	25	212	131	17	0
chr6_87088186_T_C_b38	700	8	687	17	2.16521	0.0722635	1134	0.0008867	not_sig	346	8	0	6	336	15	1	8
chr16_57051553_C_T_b38	693	11	716	4	0.351955	0.0723674	1135	0.000887481	not_sig	341	11	0	8	356	4	0	0
chr19_10107848_C_G_b38	463	253	497	221	0.81376	0.0724284	1136	0.000888263	not_sig	150	163	45	2	176	145	38	1
chr19_4186398_T_G_b38	564	114	624	96	0.761134	0.0724737	1137	0.000889045	not_sig	229	106	4	21	270	84	6	0
chr11_292798_A_G_b38	253	467	220	500	1.23126	0.0725164	1138	0.000889827	not_sig	53	147	160	0	23	174	163	0
chr14_75071514_G_T_b38	360	358	396	324	0.822753	0.0725246	1139	0.000890609	not_sig	88	184	87	1	111	174	75	0
chr7_98959339_C_T_b38	673	45	656	64	1.45908	0.0725262	1140	0.000891391	not_sig	314	45	0	1	297	62	1	0
chr20_64072137_C_T_b38	534	154	529	191	1.25198	0.0725745	1141	0.000892173	not_sig	207	120	17	16	199	131	30	0
chr3_52550415_T_TCTC_b38	373	343	340	380	1.2154	0.0726964	1142	0.000892955	not_sig	97	179	82	2	77	186	97	0
chr4_79408189_T_C_b38	548	114	622	98	0.757376	0.0727962	1143	0.000893737	not_sig	226	96	9	29	266	90	4	0
chr19_57435556_G_C_b38	513	205	545	175	0.803535	0.0728192	1144	0.000894519	not_sig	182	149	28	1	211	123	26	0
chr19_4297971_C_T_b38	463	253	498	222	0.815801	0.0728331	1145	0.000895301	not_sig	153	157	48	2	169	160	31	0
chr5_140834796_G_A_b38	328	388	364	356	0.826781	0.0728584	1146	0.000896083	not_sig	79	170	109	2	88	188	84	0
chr4_2933891_C_G_b38	637	49	685	35	0.664234	0.0728636	1147	0.000896864	not_sig	295	47	1	17	327	31	2	0
chrX_119619794_G_A_b38	678	18	682	8	0.441838	0.0728704	1148	0.000897646	not_sig	333	12	3	12	338	6	1	15
chr14_104587923_A_G_b38	584	94	643	77	0.743986	0.0728713	1149	0.000898428	not_sig	247	90	2	21	290	63	7	0
chr12_6333477_C_T_b38	710	8	702	18	2.27564	0.0729054	1150	0.00089921	not_sig	351	8	0	1	342	18	0	0
chr10_14966555_A_G_b38	667	39	695	25	0.6152	0.0729075	1151	0.000899992	not_sig	315	37	1	7	335	25	0	0
chr11_71527407_G_C_b38	573	127	615	105	0.770309	0.0729483	1152	0.000900774	not_sig	231	111	8	10	260	95	5	0
chrX_54182869_G_GGGCGGC_b38	597	119	540	138	1.28207	0.0729575	1153	0.000901556	not_sig	274	49	35	2	237	66	36	21
chr1_54717459_A_G_b38	682	34	667	51	1.53373	0.0730423	1154	0.000902338	not_sig	326	30	2	2	311	45	3	1
chrX_153957384_G_C_b38	587	129	609	103	0.769606	0.0730469	1155	0.00090312	not_sig	267	53	38	2	286	37	33	4
chr16_67180020_C_T_b38	669	51	686	34	0.650146	0.0730547	1156	0.000903902	not_sig	312	45	3	0	327	32	1	0
chr16_2211682_C_T_b38	371	349	336	384	1.2149	0.0730563	1157	0.000904684	not_sig	90	191	79	0	73	190	97	0
chr22_19962712_C_T_b38	374	346	339	381	1.21484	0.0730895	1158	0.000905466	not_sig	91	192	77	0	76	187	97	0
chr16_1509837_T_C_b38	512	206	544	176	0.804112	0.0733001	1159	0.000906248	not_sig	180	152	27	1	205	134	21	0
chr17_17043029_G_C_b38	286	370	344	366	0.822407	0.0733526	1160	0.000907029	not_sig	58	170	100	32	87	170	98	5
chr2_232525208_A_G_b38	229	491	197	523	1.2382	0.0734103	1161	0.000907811	not_sig	33	163	164	0	29	139	192	0
chr6_32043937_A_G_b38	423	295	454	260	0.821175	0.0735455	1162	0.000908593	not_sig	127	169	63	1	144	166	47	3
chr3_50287241_T_G_b38	591	95	643	77	0.744978	0.0737154	1163	0.000909375	not_sig	255	81	7	17	288	67	5	0
chr14_24330372_C_G_b38	420	228	500	220	0.810526	0.0737308	1164	0.000910157	not_sig	134	152	38	36	177	146	37	0
chr14_20356256_G_T_b38	530	188	561	159	0.79901	0.0739434	1165	0.000910939	not_sig	198	134	27	1	221	119	20	0
chr17_16422939_G_T_b38	257	453	228	492	1.22424	0.0739724	1166	0.000911721	not_sig	41	175	139	5	39	150	171	0
chr19_36626400_A_G_b38	261	459	295	425	0.819209	0.0740212	1167	0.000912503	not_sig	54	153	153	0	52	191	117	0
chr19_54747326_G_A_b38	398	282	379	327	1.21771	0.0740876	1168	0.000913285	not_sig	87	224	29	20	77	225	51	7
chr20_62320547_T_TG_b38	690	30	697	17	0.560976	0.0741782	1169	0.000914067	not_sig	330	30	0	0	342	13	2	3
chr7_72948453_C_T_b38	622	98	641	75	0.742622	0.0744877	1170	0.000914849	not_sig	270	82	8	0	286	69	3	2
chr11_33031561_C_T_b38	400	300	445	275	0.82397	0.074696	1171	0.000915631	not_sig	112	176	62	10	135	175	50	0
chr9_127732512_C_T_b38	631	89	651	67	0.729681	0.0747404	1172	0.000916413	not_sig	277	77	6	0	293	65	1	1
chr1_228212065_T_C_b38	304	416	266	442	1.21429	0.0747668	1173	0.000917194	not_sig	70	164	126	0	52	162	140	6
chr16_30069459_C_T_b38	662	58	680	40	0.6714	0.0747957	1174	0.000917976	not_sig	303	56	1	0	320	40	0	0
chr11_18013058_C_G_b38	275	431	309	399	0.823891	0.0749391	1175	0.000918758	not_sig	42	191	120	7	71	167	116	6
chr2_85754718_T_G_b38	705	11	714	4	0.359053	0.0749878	1176	0.00091954	not_sig	347	11	0	2	355	4	0	1
chr1_205659180_G_A_b38	634	80	660	60	0.720455	0.0750636	1177	0.000920322	not_sig	280	74	3	3	302	56	2	0
chr17_1709834_AGC_A_b38	714	4	706	12	3.03399	0.0751889	1178	0.000921104	not_sig	355	4	0	1	347	12	0	1
chr11_68261626_C_T_b38	708	12	716	4	0.329609	0.0751934	1179	0.000921886	not_sig	349	10	1	0	356	4	0	0
chr1_201891888_C_G_b38	386	266	459	259	0.818828	0.0751965	1180	0.000922668	not_sig	107	172	47	34	149	161	49	1
chr22_23884333_G_C_b38	712	4	708	12	3.01695	0.0752069	1181	0.00092345	not_sig	354	4	0	2	348	12	0	0
chr5_13876638_C_T_b38	710	4	708	12	3.00847	0.0752274	1182	0.000924232	not_sig	353	4	0	3	348	12	0	0
chr17_27782004_T_C_b38	268	452	302	418	0.820665	0.0753161	1183	0.000925014	not_sig	44	180	136	0	65	172	123	0
chr19_35119341_A_G_b38	180	536	211	507	0.806925	0.0753243	1184	0.000925796	not_sig	23	134	201	2	33	145	181	1
chr9_136410589_C_T_b38	551	165	508	190	1.24899	0.0753346	1185	0.000926578	not_sig	212	127	19	2	189	130	30	11
chr3_97874641_C_T_b38	486	234	518	202	0.80992	0.0753397	1186	0.000927359	not_sig	165	156	39	0	182	154	24	0
chr11_44083151_C_CCT_b38	180	540	211	509	0.804107	0.0753997	1187	0.000928141	not_sig	22	136	202	0	27	157	176	0
chr5_476750_G_A_b38	702	4	708	12	2.97458	0.075402	1188	0.000928923	not_sig	349	4	0	7	348	12	0	0
chr22_19039100_A_G_b38	452	232	441	277	1.22375	0.0754508	1189	0.000929705	not_sig	150	152	40	18	140	161	58	1
chr7_23254127_A_G_b38	417	303	451	269	0.82086	0.0754918	1190	0.000930487	not_sig	118	181	61	0	140	171	49	0
chr20_62330691_A_G_b38	685	35	699	21	0.587983	0.0755256	1191	0.000931269	not_sig	325	35	0	0	341	17	2	0
chr11_59802708_G_A_b38	685	35	699	21	0.587983	0.0755256	1192	0.000932051	not_sig	325	35	0	0	339	21	0	0
chr1_26200819_C_G_b38	558	162	527	191	1.24837	0.0756309	1193	0.000932833	not_sig	218	122	20	0	196	135	28	1
chr11_691636_G_A_b38	371	315	424	296	0.822222	0.0757235	1194	0.000933615	not_sig	103	165	75	17	123	178	59	0
chr19_39196952_T_C_b38	488	232	454	264	1.22315	0.0758453	1195	0.000934397	not_sig	163	162	35	0	141	172	46	1
chr7_55181233_T_C_b38	559	129	557	163	1.2681	0.0760015	1196	0.000935179	not_sig	227	105	12	16	218	121	21	0
chr12_8231590_A_G_b38	118	602	145	575	0.777294	0.07604	1197	0.000935961	not_sig	2	114	244	0	12	121	227	0
chr1_160136741_G_A_b38	667	53	647	73	1.41994	0.0760551	1198	0.000936743	not_sig	310	47	3	0	290	67	3	0
chr4_30731101_G_A_b38	686	4	708	12	2.90678	0.0762136	1199	0.000937524	not_sig	341	4	0	15	348	12	0	0
chr12_132727387_C_G_b38	652	58	679	41	0.678787	0.0762512	1200	0.000938306	not_sig	299	54	2	5	320	39	1	0
chr10_102727217_C_T_b38	366	320	417	301	0.825585	0.0763748	1201	0.000939088	not_sig	101	164	78	17	125	167	67	1
chr17_5184307_C_G_b38	234	468	273	447	0.818681	0.0764527	1202	0.00093987	not_sig	46	142	163	9	50	173	137	0
chr16_3029684_T_C_b38	473	233	450	270	1.21803	0.0764823	1203	0.000940652	not_sig	157	159	37	7	133	184	43	0
chr17_35764321_G_C_b38	694	26	704	14	0.530813	0.0765066	1204	0.000941434	not_sig	334	26	0	0	345	14	0	1
chr4_55904542_A_C_b38	587	63	668	50	0.697415	0.0765323	1205	0.000942216	not_sig	263	61	1	35	309	50	0	1
chr2_26489693_C_T_b38	645	51	684	36	0.665635	0.0765477	1206	0.000942998	not_sig	299	47	2	12	326	32	2	0
chr17_7350996_G_A_b38	582	70	663	57	0.714803	0.0766834	1207	0.00094378	not_sig	259	64	3	34	307	49	4	0
chr1_162790775_C_T_b38	703	11	694	22	2.02594	0.0766884	1208	0.000944562	not_sig	346	11	0	3	336	22	0	2
chr12_49897952_G_C_b38	308	368	362	356	0.823084	0.0767294	1209	0.000945344	not_sig	80	148	110	22	94	174	91	1
chr17_45086483_T_C_b38	279	441	313	407	0.822651	0.0771192	1210	0.000946126	not_sig	56	167	137	0	67	179	114	0
chr22_20992430_A_C_b38	238	456	279	439	0.821244	0.0772983	1211	0.000946907	not_sig	40	158	149	13	56	167	136	1
chr20_35176751_A_G_b38	654	66	671	47	0.694079	0.0773692	1212	0.000947689	not_sig	302	50	8	0	313	45	1	1
chr19_17422317_A_G_b38	146	568	120	596	1.27664	0.0773744	1213	0.000948471	not_sig	12	122	223	3	10	100	248	2
chr1_16201723_G_T_b38	384	300	370	350	1.21081	0.077405	1214	0.000949253	not_sig	108	168	66	18	100	170	90	0
chr11_62614336_G_C_b38	483	237	450	270	1.22278	0.0774168	1215	0.000950035	not_sig	161	161	38	0	138	174	48	0
chr15_74180732_A_G_b38	587	133	559	161	1.27116	0.0774258	1216	0.000950817	not_sig	241	105	14	0	222	115	23	0
chr20_63696914_C_T_b38	543	177	572	148	0.793766	0.0774544	1217	0.000951599	not_sig	203	137	20	0	227	118	15	0
chr19_6751270_C_T_b38	566	132	610	110	0.773224	0.077476	1218	0.000952381	not_sig	229	108	12	11	262	86	12	0
chr20_35626801_T_C_b38	625	51	683	37	0.663882	0.077483	1219	0.000953163	not_sig	289	47	2	22	324	35	1	0
chr16_30369165_T_C_b38	468	238	444	276	1.22235	0.0775109	1220	0.000953945	not_sig	153	162	38	7	144	156	60	0
chr12_27714773_C_T_b38	239	469	211	507	1.22448	0.0776039	1221	0.000954727	not_sig	32	175	147	6	32	147	180	1
chr16_70136319_G_T_b38	573	119	619	99	0.770109	0.0776293	1222	0.000955509	not_sig	227	119	0	14	260	99	0	1
chr1_193105521_T_A_b38	196	524	165	549	1.24455	0.0777061	1223	0.000956291	not_sig	24	148	188	0	24	117	216	3
chr9_135499671_A_C_b38	398	318	434	286	0.824769	0.077725	1224	0.000957072	not_sig	111	176	71	2	125	184	51	0
chr19_6751268_A_G_b38	568	132	610	110	0.775956	0.0777399	1225	0.000957854	not_sig	230	108	12	10	262	86	12	0
chr19_49359784_C_G_b38	493	193	546	172	0.804684	0.0777402	1226	0.000958636	not_sig	169	155	19	17	207	132	20	1
chr10_37856214_T_C_b38	616	52	642	76	1.40235	0.0778995	1227	0.000959418	not_sig	283	50	1	26	287	68	4	1
chr11_433995_G_A_b38	272	448	239	481	1.22191	0.0779464	1228	0.0009602	not_sig	52	168	140	0	42	155	163	0
chr20_31760029_A_G_b38	395	323	426	288	0.826756	0.0780437	1229	0.000960982	not_sig	103	189	67	1	122	182	53	3
chr12_52771064_G_A_b38	323	391	292	428	1.21084	0.0783084	1230	0.000961764	not_sig	72	179	106	3	68	156	136	0
chr17_42120388_G_C_b38	506	176	564	156	0.795213	0.0783697	1231	0.000962546	not_sig	187	132	22	19	214	136	10	0
chr17_39666058_A_C_b38	187	533	218	502	0.807907	0.0786179	1232	0.000963328	not_sig	17	153	190	0	31	156	173	0
chr22_21628603_C_T_b38	572	148	599	121	0.780716	0.0786309	1233	0.00096411	not_sig	228	116	16	0	245	109	6	0
chr17_75234761_C_T_b38	121	597	148	572	0.783331	0.0786787	1234	0.000964892	not_sig	15	91	253	1	18	112	230	0
chr1_229659323_T_G_b38	330	372	305	415	1.20703	0.0786857	1235	0.000965674	not_sig	77	176	98	9	58	189	113	0
chr19_49033133_C_A_b38	467	247	490	212	0.818012	0.0787079	1236	0.000966456	not_sig	148	171	38	3	165	160	26	9
chr17_7015264_G_C_b38	581	109	630	90	0.761468	0.0787794	1237	0.000967237	not_sig	242	97	6	15	276	78	6	0
chr6_145735545_C_T_b38	373	345	326	364	1.20718	0.0788342	1238	0.000968019	not_sig	95	183	81	1	72	182	91	15
chr15_64750361_G_A_b38	660	4	708	12	2.79661	0.0789446	1239	0.000968801	not_sig	328	4	0	28	348	12	0	0
chr2_241069858_G_T_b38	537	167	519	201	1.24534	0.0790864	1240	0.000969583	not_sig	204	129	19	8	189	141	30	0
chr20_34920785_G_T_b38	247	435	294	426	0.822754	0.0792011	1241	0.000970365	not_sig	55	137	149	19	63	168	129	0
chr20_63742354_G_T_b38	198	522	168	550	1.24179	0.0792072	1242	0.000971147	not_sig	25	148	187	0	17	134	208	1
chr15_74203214_TTG_T_b38	431	245	492	228	0.815231	0.0794081	1243	0.000971929	not_sig	133	165	40	22	170	152	38	0
chr12_12908360_C_T_b38	531	189	500	220	1.23619	0.0795123	1244	0.000972711	not_sig	197	137	26	0	171	158	31	0
chr17_75047242_C_T_b38	447	211	471	179	0.805114	0.0796308	1245	0.000973493	not_sig	151	145	33	31	169	133	23	35
chr17_4560501_G_A_b38	516	178	564	156	0.801817	0.079882	1246	0.000974275	not_sig	187	142	18	13	219	126	15	0
chr17_35170312_A_G_b38	342	360	385	335	0.826623	0.0799596	1247	0.000975057	not_sig	82	178	91	9	102	181	77	0
chr16_28982328_AC_A_b38	437	281	470	248	0.820595	0.0799619	1248	0.000975839	not_sig	128	181	50	1	158	154	47	1
chr19_48835841_T_C_b38	483	177	555	163	0.801435	0.0801065	1249	0.000976621	not_sig	177	129	24	30	217	121	21	1
chr16_88703906_G_A_b38	439	281	472	248	0.820858	0.0802063	1250	0.000977402	not_sig	138	163	59	0	157	158	45	0
chr16_87411757_G_A_b38	380	340	414	306	0.826087	0.0803379	1251	0.000978184	not_sig	99	182	79	0	127	160	73	0
chr22_25205147_C_T_b38	680	18	711	9	0.4782	0.0803879	1252	0.000978966	not_sig	331	18	0	11	351	9	0	0
chr9_78266855_C_T_b38	683	35	698	22	0.615063	0.0803978	1253	0.000979748	not_sig	325	33	1	1	338	22	0	0
chr4_56655806_GGCTCAGCC_G_b38	379	341	413	307	0.826177	0.0804241	1254	0.00098053	not_sig	101	177	82	0	113	187	60	0
chr19_10446221_C_T_b38	631	83	657	63	0.728998	0.080609	1255	0.000981312	not_sig	281	69	7	3	299	59	2	0
chr17_44093838_T_C_b38	153	567	182	538	0.797663	0.0806535	1256	0.000982094	not_sig	8	137	215	0	20	142	198	0
chr16_1509964_T_C_b38	601	51	681	39	0.674873	0.0806777	1257	0.000982876	not_sig	277	47	2	34	321	39	0	0
chr14_20289645_C_A_b38	566	150	594	124	0.787699	0.0808774	1258	0.000983658	not_sig	219	128	11	2	248	98	13	1
chr10_102504350_C_T_b38	347	373	313	407	1.20968	0.0808917	1259	0.00098444	not_sig	83	181	96	0	68	177	115	0
chr15_84646233_T_G_b38	523	193	494	224	1.22876	0.0811815	1260	0.000985222	not_sig	185	153	20	2	174	146	39	1
chr9_990840_C_T_b38	537	183	566	154	0.798413	0.0812837	1261	0.000986004	not_sig	200	137	23	0	229	108	23	0
chr6_73369301_A_G_b38	320	400	354	366	0.827119	0.0813298	1262	0.000986786	not_sig	76	168	116	0	90	174	96	0
chr10_123041337_C_T_b38	537	165	579	141	0.792558	0.0813371	1263	0.000987567	not_sig	203	131	17	9	232	115	13	0
chr17_17303887_C_G_b38	661	41	689	27	0.631775	0.0814133	1264	0.000988349	not_sig	311	39	1	9	333	23	2	2
chr10_132918591_A_G_b38	653	11	697	23	1.95891	0.0814351	1265	0.000989131	not_sig	321	11	0	28	337	23	0	0
chr12_8229613_C_T_b38	219	493	253	467	0.819962	0.0815188	1266	0.000989913	not_sig	16	187	153	4	31	191	138	0
chr5_140808990_G_C_b38	330	390	363	355	0.827506	0.0815425	1267	0.000990695	not_sig	81	168	111	0	89	185	85	1
chr8_144515746_C_T_b38	361	359	395	325	0.827369	0.0815719	1268	0.000991477	not_sig	92	177	91	0	110	175	75	0
chr7_87509329_A_G_b38	394	326	360	360	1.20859	0.0816132	1269	0.000992259	not_sig	105	184	71	0	90	180	90	0
chr16_2211656_A_G_b38	368	350	335	385	1.20836	0.0816663	1270	0.000993041	not_sig	88	192	79	1	72	191	97	0
chr4_8219331_G_A_b38	255	465	288	432	0.822581	0.081824	1271	0.000993823	not_sig	44	167	149	0	62	164	134	0
chr1_183508096_G_A_b38	304	352	299	419	1.21025	0.0818546	1272	0.000994605	not_sig	70	164	94	32	51	197	111	1
chr15_85579548_T_C_b38	221	499	252	466	0.818987	0.0818619	1273	0.000995387	not_sig	31	159	170	0	40	172	147	1
chr3_52291743_A_G_b38	376	344	342	378	1.20808	0.0819534	1274	0.000996169	not_sig	103	170	87	0	75	192	93	0
chr1_112525955_C_T_b38	568	152	595	125	0.785051	0.0820348	1275	0.000996951	not_sig	227	114	19	0	246	103	11	0
chr6_2970334_G_A_b38	221	499	253	467	0.817501	0.0820748	1276	0.000997732	not_sig	40	141	179	0	38	177	145	0
chr1_151707424_C_T_b38	489	221	464	256	1.22078	0.0820807	1277	0.000998514	not_sig	175	139	41	5	153	158	49	0
chr12_107756981_C_A_b38	425	261	413	307	1.21042	0.0821143	1278	0.000999296	not_sig	126	173	44	17	116	181	63	0
chr11_95025895_A_G_b38	115	603	137	559	0.778165	0.0821716	1279	0.00100008	not_sig	8	99	252	1	16	105	227	12
chr17_17997676_T_C_b38	414	254	479	241	0.820065	0.0822013	1280	0.00100086	not_sig	132	150	52	26	166	147	47	0
chr20_35617113_G_A_b38	557	123	615	105	0.773151	0.0822606	1281	0.00100164	not_sig	228	101	11	20	261	93	6	0
chr17_50626625_G_A_b38	681	37	666	54	1.49233	0.0826301	1282	0.00100242	not_sig	325	31	3	1	308	50	2	0
chr7_124747320_A_G_b38	186	528	157	557	1.24978	0.0827501	1283	0.00100321	not_sig	21	144	192	3	14	129	214	3
chr9_133475078_T_G_b38	197	523	227	491	0.814742	0.0827629	1284	0.00100399	not_sig	34	129	197	0	34	159	166	1
chr8_142786489_C_T_b38	409	293	452	268	0.82766	0.0828139	1285	0.00100477	not_sig	117	175	59	9	141	170	49	0
chr19_54632735_C_T_b38	245	475	256	408	0.822039	0.0828851	1286	0.00100555	not_sig	39	167	154	0	45	166	121	28
chr19_45420395_A_G_b38	388	300	438	280	0.826788	0.0830613	1287	0.00100633	not_sig	105	178	61	16	144	150	65	1
chr11_64808033_C_T_b38	696	18	711	9	0.489451	0.0830664	1288	0.00100712	not_sig	339	18	0	3	351	9	0	0
chr1_150268830_G_T_b38	593	61	630	88	1.3579	0.0831048	1289	0.0010079	not_sig	268	57	2	33	279	72	8	1
chr5_170788634_T_C_b38	602	66	668	52	0.710034	0.0831163	1290	0.00100868	not_sig	270	62	2	26	310	48	2	0
chr14_23527563_A_G_b38	563	153	593	127	0.788072	0.0832242	1291	0.00100946	not_sig	216	131	11	2	249	95	16	0
chr5_151316937_G_A_b38	426	294	457	261	0.827535	0.0832473	1292	0.00101024	not_sig	129	168	63	0	144	169	46	1
chr19_35768390_C_T_b38	635	85	656	64	0.728838	0.0832752	1293	0.00101103	not_sig	279	77	4	0	298	60	2	0
chr3_46922012_T_C_b38	255	453	228	492	1.21471	0.08329	1294	0.00101181	not_sig	40	175	139	6	41	146	173	0
chr16_77742162_A_G_b38	351	313	338	364	1.20767	0.0834845	1295	0.00101259	not_sig	89	173	70	28	85	168	98	9
chr1_175128221_C_G_b38	502	154	521	199	1.24508	0.0836024	1296	0.00101337	not_sig	189	124	15	32	187	147	26	0
chr8_22067738_G_A_b38	580	82	652	68	0.737693	0.0837398	1297	0.00101415	not_sig	258	64	9	29	296	60	4	0
chr12_123671186_C_A_b38	649	41	692	28	0.640491	0.0838753	1298	0.00101493	not_sig	304	41	0	15	334	24	2	0
chr3_186784876_C_T_b38	648	68	670	50	0.71115	0.0839753	1299	0.00101572	not_sig	293	62	3	2	310	50	0	0
chr1_154544741_T_C_b38	578	142	550	170	1.25813	0.0840499	1300	0.0010165	not_sig	236	106	18	0	211	128	21	0
chr19_35267842_G_C_b38	699	9	693	19	2.12939	0.0840941	1301	0.00101728	not_sig	345	9	0	6	337	19	0	4
chr21_32353956_A_G_b38	705	9	701	19	2.12316	0.0841665	1302	0.00101806	not_sig	348	9	0	3	341	19	0	0
chr7_44536065_G_T_b38	701	9	701	19	2.11111	0.084296	1303	0.00101884	not_sig	346	9	0	5	342	17	1	0
chr14_24192971_C_T_b38	592	128	617	103	0.772083	0.0846683	1304	0.00101963	not_sig	246	100	14	0	268	81	11	0
chr19_39200496_C_A_b38	489	229	459	261	1.21423	0.0847352	1305	0.00102041	not_sig	165	159	35	1	143	173	44	0
chr10_59793016_C_T_b38	143	577	171	549	0.795676	0.0847684	1306	0.00102119	not_sig	18	107	235	0	22	127	211	0
chrX_153783934_A_G_b38	456	264	484	230	0.820811	0.0848919	1307	0.00102197	not_sig	190	76	94	0	202	80	75	3
chr6_95586736_G_A_b38	655	65	633	85	1.35314	0.0848953	1308	0.00102275	not_sig	297	61	2	0	281	71	7	1
chr11_66561406_G_A_b38	514	202	485	233	1.22244	0.0849561	1309	0.00102354	not_sig	177	160	21	2	167	151	41	1
chr6_30953180_G_A_b38	532	138	598	122	0.786486	0.0854855	1310	0.00102432	not_sig	205	122	8	25	253	92	15	0
chr17_35844448_G_A_b38	708	12	697	23	1.94692	0.0856499	1311	0.0010251	not_sig	348	12	0	0	337	23	0	0
chr17_75521696_G_A_b38	708	12	697	23	1.94692	0.0856499	1312	0.00102588	not_sig	348	12	0	0	337	23	0	0
chr11_16826179_C_T_b38	697	23	683	37	1.64167	0.0856766	1313	0.00102666	not_sig	337	23	0	0	324	35	1	0
chr1_19282760_T_C_b38	116	604	142	578	0.781737	0.085677	1314	0.00102745	not_sig	11	94	255	0	15	112	233	0
chr3_186790133_C_T_b38	500	210	537	183	0.811386	0.0857829	1315	0.00102823	not_sig	183	134	38	5	204	129	27	0
chr19_45179662_C_T_b38	695	23	696	12	0.52099	0.0858866	1316	0.00102901	not_sig	336	23	0	1	342	12	0	6
chr14_50302999_G_A_b38	283	415	325	395	0.828804	0.0859703	1317	0.00102979	not_sig	53	177	119	11	73	179	108	0
chr9_1056728_G_C_b38	486	234	454	266	1.21688	0.086129	1318	0.00103057	not_sig	163	160	37	0	134	186	40	0
chr15_89630503_C_CAG_b38	311	405	280	440	1.2067	0.0861862	1319	0.00103136	not_sig	70	171	117	2	52	176	132	0
chr19_48837601_C_T_b38	469	187	543	175	0.808294	0.0862471	1320	0.00103214	not_sig	169	131	28	32	206	131	22	1
chr16_1510885_A_G_b38	492	188	550	170	0.808897	0.0864261	1321	0.00103292	not_sig	175	142	23	20	209	132	19	0
chr5_135940512_AGTT_A_b38	215	491	184	516	1.22797	0.0864539	1322	0.0010337	not_sig	32	151	170	7	17	150	183	10
chr3_158732389_A_G_b38	435	285	397	313	1.20337	0.086498	1323	0.00103448	not_sig	129	177	54	0	103	191	61	5
chr17_18930497_C_T_b38	399	271	460	258	0.825782	0.0866643	1324	0.00103526	not_sig	125	149	61	25	148	164	47	1
chr15_41736156_C_A_b38	272	394	261	459	1.21407	0.0867099	1325	0.00103605	not_sig	56	160	117	27	49	163	148	0
chr21_46297772_G_A_b38	206	506	239	481	0.819339	0.0867723	1326	0.00103683	not_sig	26	154	176	4	44	151	165	0
chr20_63690302_G_A_b38	174	546	146	574	1.2529	0.0869023	1327	0.00103761	not_sig	17	140	203	0	13	120	227	0
chr7_128850499_T_C_b38	529	155	584	136	0.794786	0.0869091	1328	0.00103839	not_sig	202	125	15	18	237	110	13	0
chr19_43648948_A_G_b38	613	107	636	84	0.756657	0.087204	1329	0.00103917	not_sig	262	89	9	0	284	68	8	0
chr16_1202441_T_C_b38	510	182	501	219	1.22491	0.0873632	1330	0.00103996	not_sig	188	134	24	14	181	139	40	0
chr1_28237768_A_G_b38	536	184	506	214	1.232	0.0874085	1331	0.00104074	not_sig	197	142	21	0	180	146	34	0
chr16_66550091_G_C_b38	663	27	700	16	0.56127	0.0874266	1332	0.00104152	not_sig	319	25	1	15	342	16	0	2
chr15_74175515_G_A_b38	208	512	239	481	0.817599	0.0874418	1333	0.0010423	not_sig	27	154	179	0	48	143	169	0
chr22_41926850_G_T_b38	637	31	682	20	0.602592	0.0875198	1334	0.00104308	not_sig	303	31	0	26	331	20	0	9
chr16_2210566_C_T_b38	410	292	388	332	1.20145	0.0875604	1335	0.00104387	not_sig	115	180	56	9	102	184	74	0
chr1_93879024_C_A_b38	480	240	447	271	1.21253	0.0876262	1336	0.00104465	not_sig	157	166	37	0	147	153	59	1
chr1_65401708_C_G_b38	321	395	290	430	1.20498	0.0876429	1337	0.00104543	not_sig	68	185	105	2	57	176	127	0
chr16_1788036_C_G_b38	623	97	645	75	0.746823	0.0877081	1338	0.00104621	not_sig	269	85	6	0	286	73	1	0
chr3_156291825_A_G_b38	432	288	399	321	1.20677	0.0877919	1339	0.00104699	not_sig	127	178	55	0	113	173	74	0
chr5_74636490_T_C_b38	240	464	277	443	0.827213	0.087826	1340	0.00104778	not_sig	36	168	148	8	53	171	136	0
chr20_45872819_A_G_b38	325	393	292	426	1.20647	0.0879967	1341	0.00104856	not_sig	67	191	101	1	64	164	131	1
chr6_31968891_T_C_b38	165	553	194	526	0.808989	0.0880724	1342	0.00104934	not_sig	17	131	211	1	28	138	194	0
chr19_15794851_C_A_b38	551	165	525	195	1.24035	0.0881456	1343	0.00105012	not_sig	215	121	22	2	197	131	32	0
chr16_67884055_G_A_b38	660	36	696	24	0.632184	0.0881769	1344	0.0010509	not_sig	313	34	1	12	336	24	0	0
chr2_74498051_G_A_b38	592	118	624	96	0.771838	0.0882383	1345	0.00105169	not_sig	244	104	7	5	270	84	6	0
chr3_47005686_A_AG_b38	325	395	292	428	1.206	0.0883291	1346	0.00105247	not_sig	68	189	103	0	63	166	131	0
chr17_81860384_G_T_b38	561	145	590	120	0.786908	0.0884155	1347	0.00105325	not_sig	222	117	14	7	244	102	9	5
chr3_47005352_G_C_b38	327	393	294	426	1.20564	0.0885826	1348	0.00105403	not_sig	69	189	102	0	64	166	130	0
chr16_84981935_G_A_b38	567	129	611	109	0.784113	0.0886347	1349	0.00105481	not_sig	229	109	10	12	258	95	7	0
chr19_57494168_A_G_b38	580	106	632	88	0.761882	0.0887029	1350	0.00105559	not_sig	245	90	8	17	276	80	4	0
chr3_138611020_G_A_b38	301	409	338	382	0.831744	0.0887953	1351	0.00105638	not_sig	59	183	113	5	82	174	104	0
chr19_51627235_G_A_b38	655	59	641	79	1.36823	0.0890094	1352	0.00105716	not_sig	299	57	1	3	287	67	6	0
chr9_136792104_G_A_b38	478	216	526	194	0.816188	0.08919	1353	0.00105794	not_sig	158	162	27	13	197	132	31	0
chr19_49828421_CT_C_b38	345	361	319	401	1.20134	0.0894056	1354	0.00105872	not_sig	85	175	93	7	68	183	109	0
chr9_127726328_G_A_b38	699	15	713	7	0.457504	0.0894553	1355	0.0010595	not_sig	342	15	0	3	353	7	0	0
chr22_50525724_T_C_b38	178	540	150	568	1.2482	0.0895645	1356	0.00106029	not_sig	24	130	205	1	17	116	226	1
chr1_151770322_T_C_b38	483	213	469	251	1.21358	0.0896895	1357	0.00106107	not_sig	169	145	34	12	152	165	43	0
chr6_25726546_A_C_b38	485	219	523	193	0.817247	0.0900027	1358	0.00106185	not_sig	162	161	29	8	193	137	28	2
chr14_104775891_T_C_b38	401	247	478	242	0.82193	0.0900991	1359	0.00106263	not_sig	117	167	40	36	163	152	45	0
chr21_39191488_A_G_b38	601	97	638	78	0.75749	0.0902911	1360	0.00106341	not_sig	258	85	6	11	287	64	7	2
chr14_88396185_G_A_b38	434	248	484	228	0.82438	0.0903472	1361	0.0010642	not_sig	132	170	39	19	164	156	36	4
chr1_108852483_C_T_b38	147	573	121	599	1.27	0.0903799	1362	0.00106498	not_sig	16	115	229	0	10	101	249	0
chr22_50522740_A_G_b38	178	536	152	568	1.24097	0.0904254	1363	0.00106576	not_sig	24	130	203	3	17	118	225	0
chr9_2828742_C_A_b38	641	15	691	29	1.79344	0.0904796	1364	0.00106654	not_sig	313	15	0	32	331	29	0	0
chr20_2798411_G_A_b38	704	16	713	7	0.431978	0.0905402	1365	0.00106732	not_sig	344	16	0	0	353	7	0	0
chr9_34397547_A_G_b38	349	369	317	403	1.20239	0.0905507	1366	0.00106811	not_sig	82	185	92	1	70	177	113	0
chr22_50226877_C_T_b38	707	7	702	16	2.30199	0.0905549	1367	0.00106889	not_sig	350	7	0	3	343	16	0	1
chr8_76704284_G_C_b38	682	38	696	24	0.618875	0.0907232	1368	0.00106967	not_sig	322	38	0	0	337	22	1	0
chr16_89694304_G_A_b38	380	290	441	279	0.828994	0.0907245	1369	0.00107045	not_sig	107	166	62	25	131	179	50	0
chr4_4860247_C_T_b38	682	38	694	24	0.620658	0.0907333	1370	0.00107123	not_sig	323	36	1	0	336	22	1	1
chr18_36138238_T_TC_b38	393	325	360	358	1.20251	0.0908197	1371	0.00107202	not_sig	117	159	83	1	96	168	95	1
chr19_47545853_G_A_b38	715	3	708	10	3.36629	0.0908259	1372	0.0010728	not_sig	356	3	0	1	349	10	0	1
chr12_49964761_T_C_b38	10	710	3	717	3.3662	0.09083	1373	0.00107358	not_sig	0	10	350	0	0	3	357	0
chr10_100063639_C_T_b38	715	3	710	10	3.35681	0.090832	1374	0.00107436	not_sig	356	3	0	1	350	10	0	0
chr15_78286140_TG_T_b38	506	176	562	158	0.808274	0.0908732	1375	0.00107514	not_sig	186	134	21	19	217	128	15	0
chr11_44938373_G_A_b38	335	375	372	348	0.835699	0.0909021	1376	0.00107592	not_sig	79	177	99	5	100	172	88	0
chr2_74460131_A_ACACATTT_b38	582	120	621	99	0.773188	0.0909305	1377	0.00107671	not_sig	238	106	7	9	267	87	6	0
chr12_52691088_C_T_b38	495	217	470	250	1.21335	0.0909479	1378	0.00107749	not_sig	174	147	35	4	157	156	47	0
chr8_144263177_G_A_b38	369	351	400	318	0.835769	0.0910358	1379	0.00107827	not_sig	94	181	85	0	107	186	66	1
chr2_95281337_A_G_b38	152	568	180	540	0.802817	0.091071	1380	0.00107905	not_sig	15	122	223	0	22	136	202	0
chr11_6481497_C_G_b38	584	136	557	163	1.25663	0.091078	1381	0.00107983	not_sig	240	104	16	0	218	121	21	0
chr11_6481550_C_A_b38	584	136	557	163	1.25663	0.091078	1382	0.00108062	not_sig	240	104	16	0	218	121	21	0
chr14_23155374_C_T_b38	152	566	180	540	0.805654	0.0911385	1383	0.0010814	not_sig	17	118	224	1	25	130	205	0
chr20_45890204_A_T_b38	285	435	253	467	1.20935	0.0912358	1384	0.00108218	not_sig	49	187	124	0	45	163	152	0
chrX_101345811_A_AT_b38	696	10	681	3	0.306608	0.0913024	1385	0.00108296	not_sig	345	6	2	7	340	1	1	18
chr17_74775627_C_G_b38	660	56	680	40	0.693277	0.091453	1386	0.00108374	not_sig	305	50	3	2	321	38	1	0
chr5_140802149_A_G_b38	331	389	364	356	0.832199	0.0914599	1387	0.00108453	not_sig	82	167	111	0	88	188	84	0
chr5_141333019_C_T_b38	689	7	704	16	2.23701	0.0915714	1388	0.00108531	not_sig	341	7	0	12	344	16	0	0
chr11_124877941_G_A_b38	219	491	253	467	0.823302	0.0915735	1389	0.00108609	not_sig	36	147	172	5	46	161	153	0
chr13_113669682_T_C_b38	377	343	344	376	1.20137	0.0916554	1390	0.00108687	not_sig	99	179	82	0	76	192	92	0
chr3_113279418_A_G_b38	447	249	493	227	0.826584	0.091823	1391	0.00108765	not_sig	142	163	43	12	172	149	39	0
chr2_173221764_C_T_b38	556	164	583	137	0.796678	0.091876	1392	0.00108844	not_sig	218	120	22	0	237	109	14	0
chr16_83966048_A_G_b38	558	96	637	83	0.757359	0.0919404	1393	0.00108922	not_sig	240	78	9	33	281	75	4	0
chr19_15794396_T_C_b38	571	149	597	123	0.789552	0.0922299	1394	0.00109	not_sig	224	123	13	0	247	103	10	0
chr20_50752537_AGT_A_b38	556	154	533	183	1.23959	0.0923865	1395	0.00109078	not_sig	214	128	13	5	194	145	19	2
chr19_11204131_CTGGGGATGAGGAG_C_b38	295	409	268	448	1.20571	0.0925928	1396	0.00109156	not_sig	59	177	116	8	41	186	131	2
chr16_728024_T_C_b38	555	165	580	138	0.800313	0.0927305	1397	0.00109234	not_sig	216	123	21	0	239	102	18	1
chr11_66026471_A_G_b38	462	224	515	205	0.820995	0.0930868	1398	0.00109313	not_sig	158	146	39	17	181	153	26	0
chr12_6465878_G_T_b38	524	196	494	226	1.22309	0.0930904	1399	0.00109391	not_sig	193	138	29	0	167	160	33	0
chr6_31946403_G_A_b38	642	72	666	54	0.722973	0.0931347	1400	0.00109469	not_sig	289	64	4	3	307	52	1	0
chr8_134512401_T_C_b38	544	174	517	203	1.2276	0.0932702	1401	0.00109547	not_sig	205	134	20	1	182	153	25	0
chr16_30966478_G_A_b38	263	445	299	421	0.83216	0.0933139	1402	0.00109625	not_sig	40	183	131	6	65	169	126	0
chr2_95897458_A_T_b38	494	182	465	211	1.23164	0.093469	1403	0.00109704	not_sig	183	128	27	22	161	143	34	22
chr20_62809683_G_A_b38	311	339	378	342	0.830032	0.0934707	1404	0.00109782	not_sig	76	159	90	35	97	184	79	0
chr21_46413041_C_T_b38	605	65	615	47	0.71132	0.0936041	1405	0.0010986	not_sig	272	61	2	25	284	47	0	29
chr8_19960925_C_A_b38	639	79	617	101	1.32407	0.0939883	1406	0.00109938	not_sig	290	59	10	1	265	87	7	1
chrX_16858857_G_A_b38	365	321	404	296	0.833102	0.09407	1407	0.00110016	not_sig	137	91	115	17	159	86	105	10
chr15_82952022_T_C_b38	613	89	649	71	0.753501	0.0940985	1408	0.00110095	not_sig	266	81	4	9	294	61	5	0
chr1_227921770_C_T_b38	695	19	710	10	0.515196	0.0941307	1409	0.00110173	not_sig	338	19	0	3	350	10	0	0
chr5_179080003_A_G_b38	711	5	703	13	2.62959	0.094174	1410	0.00110251	not_sig	353	5	0	2	345	13	0	2
chr11_64231859_C_T_b38	715	5	707	13	2.62942	0.0941856	1411	0.00110329	not_sig	355	5	0	0	347	13	0	0
chr11_1078394_C_T_b38	713	5	707	13	2.62207	0.0941885	1412	0.00110407	not_sig	354	5	0	1	347	13	0	0
chr16_88713682_G_A_b38	629	89	608	112	1.30189	0.0942014	1413	0.00110486	not_sig	277	75	7	1	258	92	10	0
chr22_43180898_G_A_b38	391	305	437	283	0.830198	0.0944741	1414	0.00110564	not_sig	103	185	60	12	132	173	55	0
chr12_32399835_C_G_b38	449	259	486	232	0.827558	0.094627	1415	0.00110642	not_sig	143	163	48	6	164	158	37	1
chr19_3813908_A_C_b38	701	13	696	24	1.85942	0.0946358	1416	0.0011072	not_sig	345	11	1	3	337	22	1	0
chr16_405497_G_C_b38	638	82	658	62	0.733116	0.0948442	1417	0.00110798	not_sig	280	78	2	0	304	50	6	0
chr17_81512443_A_C_b38	304	402	278	442	1.20233	0.0948484	1418	0.00110877	not_sig	61	182	110	7	54	170	136	0
chr9_35559216_C_T_b38	555	135	604	116	0.789551	0.0948863	1419	0.00110955	not_sig	220	115	10	15	255	94	11	0
chr10_132203884_C_G_b38	589	99	638	82	0.764669	0.0950343	1420	0.00111033	not_sig	254	81	9	16	282	74	4	0
chr17_82719095_C_G_b38	405	309	434	276	0.83352	0.0951221	1421	0.00111111	not_sig	112	181	64	3	136	162	57	5
chr1_20115561_T_C_b38	272	442	306	414	0.832579	0.0951748	1422	0.00111189	not_sig	48	176	133	3	75	156	129	0
chr9_21816759_G_A_b38	378	312	427	293	0.831337	0.0952111	1423	0.00111267	not_sig	106	166	73	15	136	155	69	0
chr19_57490144_T_A_b38	456	260	489	231	0.828504	0.0952824	1424	0.00111346	not_sig	145	166	47	2	162	165	33	0
chr7_66086834_C_T_b38	605	43	688	32	0.654408	0.0953055	1425	0.00111424	not_sig	282	41	1	36	329	30	1	0
chr19_5776360_C_T_b38	635	15	710	8	0.476995	0.0953288	1426	0.00111502	not_sig	310	15	0	35	351	8	0	1
chr1_228214420_A_G_b38	304	416	272	448	1.20362	0.0953684	1427	0.0011158	not_sig	70	164	126	0	53	166	141	0
chr8_17413255_C_A_b38	513	207	542	178	0.813894	0.0954067	1428	0.00111658	not_sig	184	145	31	0	203	136	21	0
chr11_1456567_C_T_b38	542	178	513	207	1.22866	0.0954067	1429	0.00111737	not_sig	211	120	29	0	184	145	31	0
chr2_3576461_C_A_b38	673	41	662	58	1.43814	0.0954672	1430	0.00111815	not_sig	317	39	1	3	305	52	3	0
chr7_76397918_T_C_b38	341	329	399	321	0.833855	0.0955533	1431	0.00111893	not_sig	75	191	69	25	109	181	70	0
chr1_228214807_C_T_b38	415	305	447	273	0.831005	0.095559	1432	0.00111971	not_sig	125	165	70	0	141	165	54	0
chr19_43353721_G_C_b38	456	262	488	232	0.827431	0.0957325	1433	0.00112049	not_sig	143	170	46	1	165	158	37	0
chr17_40834780_T_A_b38	306	414	274	446	1.20311	0.0957469	1434	0.00112128	not_sig	55	196	109	0	44	186	130	0
chr14_50231160_C_T_b38	583	113	607	91	0.773469	0.0957917	1435	0.00112206	not_sig	242	99	7	12	263	81	5	11
chr19_39027075_C_T_b38	486	184	551	169	0.810128	0.0959189	1436	0.00112284	not_sig	170	146	19	25	215	121	24	0
chr22_42516130_G_T_b38	600	80	655	65	0.744275	0.0961359	1437	0.00112362	not_sig	260	80	0	20	295	65	0	0
chr19_3589437_C_T_b38	645	71	628	92	1.33085	0.0961539	1438	0.0011244	not_sig	290	65	3	2	272	84	4	0
chr7_90282987_G_A_b38	160	558	188	530	0.808358	0.0962715	1439	0.00112519	not_sig	18	124	217	1	33	122	204	1
chr12_120224174_T_C_b38	142	566	171	549	0.805468	0.096447	1440	0.00112597	not_sig	11	120	223	6	16	139	205	0
chr13_102875652_G_C_b38	550	170	577	143	0.801815	0.0965768	1441	0.00112675	not_sig	213	124	23	0	233	111	16	0
chr10_77634571_T_G_b38	602	114	581	139	1.26337	0.0966961	1442	0.00112753	not_sig	257	88	13	2	235	111	14	0
chr4_107719963_C_A_b38	66	654	48	672	1.41284	0.0967066	1443	0.00112831	not_sig	3	60	297	0	0	48	312	0
chr2_110661849_A_G_b38	627	27	702	18	0.595442	0.0967134	1444	0.0011291	not_sig	300	27	0	33	342	18	0	0
chr11_60898869_G_A_b38	401	313	436	284	0.834511	0.0968573	1445	0.00112988	not_sig	111	179	67	3	127	182	51	0
chr16_2115957_GCCCACCA_G_b38	659	41	661	59	1.43467	0.0968619	1446	0.00113066	not_sig	311	37	2	10	304	53	3	0
chr8_6406609_G_C_b38	143	573	170	550	0.807412	0.0969647	1447	0.00113144	not_sig	12	119	227	2	17	136	207	0
chr14_24117624_C_T_b38	663	51	684	36	0.684211	0.0973887	1448	0.00113222	not_sig	307	49	1	3	324	36	0	0
chr19_3543399_C_T_b38	514	206	484	236	1.21664	0.0974772	1449	0.001133	not_sig	191	132	37	0	161	162	37	0
chr19_18168828_T_C_b38	72	648	92	626	0.756039	0.0975246	1450	0.00113379	not_sig	7	58	295	0	3	86	270	1
chr14_67587085_T_C_b38	237	483	268	452	0.82757	0.0975276	1451	0.00113457	not_sig	37	163	160	0	51	166	143	0
chr17_7327917_T_C_b38	542	110	622	98	0.776323	0.0975652	1452	0.00113535	not_sig	224	94	8	34	271	80	9	0
chr8_19364189_G_A_b38	478	236	512	208	0.822828	0.0975934	1453	0.00113613	not_sig	163	152	42	3	184	144	32	0
chr9_122092932_C_T_b38	509	211	536	182	0.819109	0.0976561	1454	0.00113691	not_sig	173	163	24	0	203	130	26	1
chr4_78776716_C_A_b38	663	33	677	21	0.623204	0.0976984	1455	0.0011377	not_sig	315	33	0	12	328	21	0	11
chr20_63246605_G_A_b38	451	269	482	238	0.827855	0.0978317	1456	0.00113848	not_sig	136	179	45	0	160	162	38	0
chr22_49913321_G_A_b38	616	92	647	73	0.75546	0.0979963	1457	0.00113926	not_sig	264	88	2	6	294	59	7	0
chr20_20052723_C_G_b38	384	322	423	297	0.83732	0.0980157	1458	0.00114004	not_sig	105	174	74	7	127	169	64	0
chr8_22098041_T_C_b38	288	428	321	399	0.836405	0.0980568	1459	0.00114082	not_sig	60	168	130	2	73	175	112	0
chr2_18584890_G_T_b38	630	44	688	32	0.665962	0.0984312	1460	0.00114161	not_sig	294	42	1	23	328	32	0	0
chr17_74473819_A_G_b38	380	326	419	301	0.837372	0.0984327	1461	0.00114239	not_sig	98	184	71	7	120	179	61	0
chr11_35619764_G_A_b38	571	145	548	172	1.23599	0.0985074	1462	0.00114317	not_sig	223	125	10	2	205	138	17	0
chr22_42020052_A_G_b38	349	343	395	325	0.837178	0.0986321	1463	0.00114395	not_sig	84	181	81	14	108	179	73	0
chr11_17388025_T_C_b38	272	438	245	475	1.20399	0.098713	1464	0.00114473	not_sig	57	158	140	5	39	167	154	0
chr1_47775419_G_T_b38	660	24	706	14	0.545326	0.0987319	1465	0.00114552	not_sig	318	24	0	18	346	14	0	0
chr7_131506254_G_A_b38	645	75	664	56	0.725301	0.0987428	1466	0.0011463	not_sig	289	67	4	0	308	48	4	0
chr10_37831714_C_T_b38	664	56	645	75	1.37874	0.0987428	1467	0.00114708	not_sig	305	54	1	0	288	69	3	0
chr9_135499928_C_T_b38	338	354	384	336	0.835452	0.0988112	1468	0.00114786	not_sig	84	170	92	14	101	182	77	0
chr20_63237871_T_C_b38	351	343	396	324	0.837265	0.0988155	1469	0.00114864	not_sig	81	189	77	13	110	176	74	0
chr5_140853365_G_C_b38	341	375	305	401	1.19555	0.0988226	1470	0.00114943	not_sig	101	139	118	2	79	147	127	7
chr17_40126371_C_T_b38	659	23	706	14	0.568173	0.0989109	1471	0.00115021	not_sig	319	21	1	19	346	14	0	0
chr16_84184959_T_C_b38	605	103	592	128	1.27001	0.0989681	1472	0.00115099	not_sig	258	89	7	6	246	100	14	0
chr11_58837333_T_A_b38	685	21	686	34	1.61669	0.0990072	1473	0.00115177	not_sig	333	19	1	7	326	34	0	0
chr12_54973394_C_T_b38	500	152	579	141	0.801064	0.0992198	1474	0.00115255	not_sig	192	116	18	34	237	105	18	0
chr19_54906696_C_A_b38	49	669	67	651	0.711666	0.0993492	1475	0.00115333	not_sig	1	47	311	1	7	53	299	1
chr5_135951340_T_C_b38	274	434	248	472	1.20158	0.0993881	1476	0.00115412	not_sig	46	182	126	6	38	172	150	0
chr16_57186104_A_C_b38	403	305	378	342	1.19547	0.0994041	1477	0.0011549	not_sig	114	175	65	6	93	192	75	0
chr14_35046893_C_G_b38	298	422	330	390	0.834554	0.099451	1478	0.00115568	not_sig	66	166	128	0	77	176	107	0
chr14_24325984_C_T_b38	685	17	691	29	1.69107	0.0994891	1479	0.00115646	not_sig	334	17	0	9	332	27	1	0
chr1_111996439_A_G_b38	612	104	637	83	0.766755	0.0996773	1480	0.00115724	not_sig	265	82	11	2	281	75	4	0
chr8_23043188_G_A_b38	626	58	676	44	0.70251	0.0996885	1481	0.00115803	not_sig	287	52	3	18	317	42	1	0
chr16_1518401_A_G_b38	519	153	582	138	0.804326	0.0997576	1482	0.00115881	not_sig	197	125	14	24	238	106	16	0
chr3_47418189_C_T_b38	335	385	303	417	1.19751	0.100029	1483	0.00115959	not_sig	77	181	102	0	63	177	120	0
chr17_50547162_A_C_b38	467	247	439	279	1.2016	0.100139	1484	0.00116037	not_sig	151	165	41	3	133	173	53	1
chr14_64214475_C_T_b38	439	249	428	292	1.20283	0.10016	1485	0.00116115	not_sig	141	157	46	16	126	176	58	0
chr1_19311815_A_G_b38	216	504	187	531	1.21696	0.100284	1486	0.00116194	not_sig	30	156	174	0	23	141	195	1
chr11_65967703_G_C_b38	382	338	414	306	0.835349	0.100343	1487	0.00116272	not_sig	106	170	84	0	117	180	63	0
chr6_31829810_C_G_b38	355	351	330	390	1.19529	0.100346	1488	0.0011635	not_sig	82	191	80	7	73	184	103	0
chr6_30950623_A_G_b38	436	284	458	248	0.831293	0.100412	1489	0.00116428	not_sig	128	180	52	0	143	172	38	7
chr2_218634036_T_G_b38	252	424	300	420	0.832075	0.100422	1490	0.00116506	not_sig	40	172	126	22	59	182	119	0
chr20_21332255_C_G_b38	674	46	687	31	0.661161	0.100482	1491	0.00116585	not_sig	317	40	3	0	328	31	0	1
chr12_9732930_C_T_b38	351	357	389	331	0.836599	0.100612	1492	0.00116663	not_sig	90	171	93	6	96	197	67	0
chr3_113960742_C_A_b38	585	129	614	106	0.782895	0.10069	1493	0.00116741	not_sig	239	107	11	3	265	84	11	0
chr4_1244468_A_T_b38	472	248	441	279	1.20408	0.100712	1494	0.00116819	not_sig	159	154	47	0	133	175	52	0
chr1_153688038_AC_A_b38	395	321	363	353	1.19663	0.100716	1495	0.00116897	not_sig	113	169	76	2	91	181	86	2
chr6_73263223_G_T_b38	135	583	157	545	0.803826	0.100938	1496	0.00116976	not_sig	9	117	233	1	24	109	218	9
chr19_47376617_C_T_b38	626	94	603	117	1.29216	0.100962	1497	0.00117054	not_sig	268	90	2	0	253	97	10	0
chr6_42964977_C_T_b38	319	401	350	368	0.836423	0.101192	1498	0.00117132	not_sig	74	171	115	0	86	178	95	1
chr8_144498892_T_C_b38	358	358	392	328	0.836735	0.101444	1499	0.0011721	not_sig	92	174	92	2	109	174	77	0
chr19_35643763_C_T_b38	627	33	697	23	0.626973	0.101494	1500	0.00117288	not_sig	297	33	0	30	338	21	1	0
chr8_144511657_C_T_b38	368	352	400	320	0.836364	0.101495	1501	0.00117366	not_sig	100	168	92	0	113	174	73	0
chr11_429659_C_T_b38	282	436	252	468	1.20118	0.101545	1502	0.00117445	not_sig	58	166	135	1	48	156	156	0
chr11_6498412_G_A_b38	353	367	321	399	1.19557	0.101557	1503	0.00117523	not_sig	91	171	98	0	75	171	114	0
chr12_9733111_A_ATAAGT_b38	355	361	389	331	0.836757	0.101558	1504	0.00117601	not_sig	91	173	94	2	96	197	67	0
chr20_63595827_C_G_b38	497	155	576	144	0.801613	0.101579	1505	0.00117679	not_sig	184	129	13	34	234	108	18	0
chr5_157731385_G_A_b38	597	117	623	95	0.77808	0.101624	1506	0.00117757	not_sig	247	103	7	3	274	75	10	1
chr21_45997781_G_C_b38	615	75	661	59	0.731921	0.101799	1507	0.00117836	not_sig	272	71	2	15	301	59	0	0
chr15_41504703_G_T_b38	570	150	543	177	1.23867	0.101869	1508	0.00117914	not_sig	226	118	16	0	202	139	19	0
chr2_262553_T_C_b38	217	503	247	473	0.826144	0.101936	1509	0.00117992	not_sig	39	139	182	0	47	153	160	0
chr7_49775794_C_G_b38	390	330	358	362	1.19502	0.101999	1510	0.0011807	not_sig	106	178	76	0	92	174	94	0
chr3_58131937_G_A_b38	668	50	652	68	1.39337	0.10208	1511	0.00118148	not_sig	314	40	5	1	295	62	3	0
chr2_176171483_G_A_b38	432	284	465	255	0.834166	0.10214	1512	0.00118227	not_sig	133	166	59	2	147	171	42	0
chr15_91006592_G_C_b38	636	76	662	58	0.733185	0.102206	1513	0.00118305	not_sig	282	72	2	4	302	58	0	0
chr20_35434589_C_A_b38	286	434	255	465	1.20168	0.102556	1514	0.00118383	not_sig	56	174	130	0	49	157	154	0
chr16_31132672_C_T_b38	501	219	471	249	1.20941	0.102705	1515	0.00118461	not_sig	177	147	36	0	149	173	38	0
chr21_25603938_A_G_b38	197	509	172	542	1.21961	0.102759	1516	0.00118539	not_sig	25	147	181	7	23	126	208	3
chr16_47610_G_A_b38	387	295	439	279	0.833736	0.102937	1517	0.00118618	not_sig	99	189	53	19	137	165	57	1
chr5_32087147_A_G_b38	565	151	542	178	1.22883	0.103034	1518	0.00118696	not_sig	222	121	15	2	206	130	24	0
chr7_100822533_A_G_b38	621	67	668	52	0.721512	0.103081	1519	0.00118774	not_sig	281	59	4	16	310	48	2	0
chr17_51171479_TTTC_T_b38	706	14	694	24	1.74393	0.103113	1520	0.00118852	not_sig	346	14	0	0	335	24	0	1
chr11_72008984_G_A_b38	695	25	706	14	0.551275	0.103353	1521	0.0011893	not_sig	335	25	0	0	346	14	0	0
chr1_9275114_G_T_b38	566	152	541	179	1.23205	0.103414	1522	0.00119009	not_sig	214	138	7	1	208	125	27	0
chr1_183186264_A_G_b38	587	131	612	108	0.79075	0.103498	1523	0.00119087	not_sig	240	107	12	1	257	98	5	0
chr12_49005079_G_A_b38	415	291	454	266	0.835566	0.103541	1524	0.00119165	not_sig	130	155	68	7	142	170	48	0
chr19_55877161_T_A_b38	647	21	682	36	1.62631	0.103573	1525	0.00119243	not_sig	313	21	0	26	323	36	0	1
chr4_44448571_G_T_b38	649	13	712	6	0.4207	0.103623	1526	0.00119321	not_sig	318	13	0	29	353	6	0	1
chr5_134115265_C_T_b38	712	6	651	13	2.36969	0.103779	1527	0.00119399	not_sig	353	6	0	1	320	11	1	28
chr11_130894645_A_T_b38	429	291	460	260	0.833259	0.103786	1528	0.00119478	not_sig	122	185	53	0	153	154	53	0
chr5_177371305_G_A_b38	548	172	520	200	1.2254	0.103982	1529	0.00119556	not_sig	208	132	20	0	190	140	30	0
chr19_39200576_A_T_b38	494	224	464	254	1.20724	0.104332	1530	0.00119634	not_sig	169	156	34	1	148	168	43	1
chrX_153766385_G_C_b38	571	147	596	122	0.795119	0.104426	1531	0.00119712	not_sig	255	61	43	1	274	48	37	1
chr17_7849205_A_C_b38	712	8	702	16	2.02849	0.104462	1532	0.0011979	not_sig	352	8	0	0	343	16	0	1
chr4_67514352_C_T_b38	650	68	669	51	0.7287	0.10447	1533	0.00119869	not_sig	293	64	2	1	309	51	0	0
chr21_45265994_T_C_b38	466	254	496	224	0.82855	0.104573	1534	0.00119947	not_sig	151	164	45	0	171	154	35	0
chr15_90889477_G_T_b38	673	47	688	32	0.666007	0.104658	1535	0.00120025	not_sig	315	43	2	0	329	30	1	0
chr22_50506089_C_T_b38	712	8	703	17	2.1522	0.104703	1536	0.00120103	not_sig	352	8	0	0	344	15	1	0
chr2_74534295_T_C_b38	587	133	611	109	0.787357	0.10489	1537	0.00120181	not_sig	236	115	9	0	258	95	7	0
chr15_90074307_C_T_b38	513	201	545	175	0.819526	0.105043	1538	0.0012026	not_sig	181	151	25	3	207	131	22	0
chr20_63741353_G_A_b38	226	494	197	523	1.21455	0.105178	1539	0.00120338	not_sig	37	152	171	0	23	151	186	0
chr17_4544941_C_T_b38	702	18	689	29	1.64151	0.105188	1540	0.00120416	not_sig	342	18	0	0	330	29	0	1
chr2_11160743_T_C_b38	67	647	87	633	0.753451	0.105394	1541	0.00120494	not_sig	4	59	294	3	7	73	280	0
chr15_30940415_A_C_b38	690	30	702	18	0.589744	0.10543	1542	0.00120572	not_sig	330	30	0	0	343	16	1	0
chr3_52444898_C_T_b38	700	18	690	30	1.69082	0.105438	1543	0.00120651	not_sig	342	16	1	1	330	30	0	0
chr1_11650934_G_A_b38	631	21	684	36	1.58145	0.105489	1544	0.00120729	not_sig	305	21	0	34	324	36	0	0
chr12_75369651_G_T_b38	445	273	446	228	0.833292	0.105518	1545	0.00120807	not_sig	140	165	54	1	150	146	41	23
chr6_31395114_C_G_b38	351	335	322	368	1.19744	0.105655	1546	0.00120885	not_sig	94	163	86	17	77	168	100	15
chr11_128902557_C_T_b38	552	164	581	139	0.805256	0.10582	1547	0.00120963	not_sig	209	134	15	2	234	113	13	0
chr6_31782032_TA_T_b38	699	21	709	11	0.516422	0.106232	1548	0.00121042	not_sig	339	21	0	0	349	11	0	0
chr11_66238852_G_C_b38	591	109	584	136	1.26266	0.106242	1549	0.0012112	not_sig	248	95	7	10	241	102	17	0
chr11_123883230_A_G_b38	77	643	97	621	0.766654	0.106284	1550	0.00121198	not_sig	4	69	287	0	7	83	269	1
chr19_35501757_C_A_b38	627	43	657	63	1.39822	0.106481	1551	0.00121276	not_sig	294	39	2	25	301	55	4	0
chr16_57628069_C_CA_b38	149	571	124	596	1.25422	0.106517	1552	0.00121354	not_sig	11	127	222	0	13	98	249	0
chr19_39435961_C_T_b38	450	258	487	233	0.834487	0.106521	1553	0.00121432	not_sig	140	170	44	6	167	153	40	0
chr17_14074261_G_A_b38	682	8	703	17	2.06152	0.106627	1554	0.00121511	not_sig	337	8	0	15	343	17	0	0
chr11_298758_G_A_b38	499	181	556	164	0.813188	0.106642	1555	0.00121589	not_sig	180	139	21	20	209	138	13	0
chr1_228211781_C_G_b38	304	416	273	447	1.19653	0.106646	1556	0.00121667	not_sig	70	164	126	0	54	165	141	0
chr1_227748061_G_A_b38	659	47	687	33	0.673511	0.106729	1557	0.00121745	not_sig	306	47	0	7	330	27	3	0
chr16_2205762_A_C_b38	660	60	636	78	1.34906	0.106982	1558	0.00121823	not_sig	305	50	5	0	282	72	3	3
chr1_205813381_C_T_b38	262	456	232	486	1.20361	0.107141	1559	0.00121902	not_sig	50	162	147	1	40	152	167	1
chr1_203222134_C_G_b38	585	135	609	111	0.789819	0.107175	1560	0.0012198	not_sig	235	115	10	0	253	103	4	0
chr16_31143037_G_A_b38	517	201	490	230	1.20733	0.107179	1561	0.00122058	not_sig	182	153	24	1	164	162	34	0
chr1_1704180_T_C_b38	311	407	280	438	1.19531	0.107644	1562	0.00122136	not_sig	75	161	123	1	56	168	135	1
chr19_50637397_G_A_b38	552	108	576	142	1.26003	0.107682	1563	0.00122214	not_sig	229	94	7	30	227	122	10	1
chr15_82552642_C_A_b38	492	182	553	167	0.816366	0.107845	1564	0.00122293	not_sig	177	138	22	23	213	127	20	0
chr15_78774311_A_G_b38	532	178	512	208	1.21419	0.107983	1565	0.00122371	not_sig	203	126	26	5	179	154	27	0
chr17_8044857_C_T_b38	376	320	420	300	0.839286	0.108103	1566	0.00122449	not_sig	106	164	78	12	125	170	65	0
chr9_137437096_G_A_b38	621	99	642	78	0.762107	0.108253	1567	0.00122527	not_sig	265	91	4	0	284	74	2	0
chr22_29740617_C_T_b38	704	2	712	8	3.95506	0.108311	1568	0.00122605	not_sig	351	2	0	7	352	8	0	0
chr2_107859502_A_G_b38	273	439	239	461	1.1995	0.108436	1569	0.00122684	not_sig	35	203	118	4	32	175	143	10
chr9_114098236_TG_T_b38	512	208	540	180	0.820513	0.108715	1570	0.00122762	not_sig	178	156	26	0	198	144	18	0
chr3_12585017_G_A_b38	454	266	484	236	0.832225	0.108733	1571	0.0012284	not_sig	148	158	54	0	160	164	36	0
chr11_123560173_ACGTGTGTG_A_b38	558	160	533	187	1.22357	0.109141	1572	0.00122918	not_sig	218	122	19	1	192	149	19	0
chr9_109119887_G_C_b38	379	339	397	299	0.842016	0.109234	1573	0.00122996	not_sig	101	177	81	1	110	177	61	12
chr11_65208274_C_T_b38	618	46	685	35	0.686449	0.109295	1574	0.00123075	not_sig	288	42	2	28	326	33	1	0
chr18_63953532_G_A_b38	509	165	570	150	0.811802	0.109347	1575	0.00123153	not_sig	191	127	19	23	228	114	18	0
chr19_11487668_T_C_b38	606	88	649	71	0.753362	0.109449	1576	0.00123231	not_sig	266	74	7	13	290	69	1	0
chr16_3606481_C_T_b38	577	143	551	169	1.23758	0.109695	1577	0.00123309	not_sig	228	121	11	0	211	129	20	0
chr1_112520503_A_G_b38	352	338	398	322	0.842556	0.109696	1578	0.00123387	not_sig	85	182	78	15	104	190	66	0
chr19_49155133_T_C_b38	396	322	428	292	0.839032	0.109711	1579	0.00123465	not_sig	122	152	85	1	126	176	58	0
chr16_724045_TGGGGCAGTGGGTGGGTGG_T_b38	515	149	581	135	0.803117	0.109747	1580	0.00123544	not_sig	203	109	20	28	240	101	17	2
chr19_10561817_C_T_b38	438	268	476	244	0.837765	0.109862	1581	0.00123622	not_sig	133	172	48	7	159	158	43	0
chr16_291182_G_A_b38	697	23	684	36	1.59497	0.109933	1582	0.001237	not_sig	337	23	0	0	324	36	0	0
chr3_9834617_G_T_b38	53	667	71	649	0.726334	0.109967	1583	0.00123778	not_sig	1	51	308	0	5	61	294	0
chr1_117060338_C_A_b38	79	641	100	620	0.764119	0.109968	1584	0.00123856	not_sig	2	75	283	0	2	96	262	0
chr16_89576050_G_A_b38	670	2	710	8	3.77465	0.110036	1585	0.00123935	not_sig	334	2	0	24	351	8	0	1
chr1_53090860_G_A_b38	695	13	714	6	0.449257	0.110212	1586	0.00124013	not_sig	341	13	0	6	354	6	0	0
chr2_231398416_G_A_b38	558	162	531	189	1.22599	0.110449	1587	0.00124091	not_sig	223	112	25	0	192	147	21	0
chr11_495057_G_T_b38	596	98	637	81	0.773332	0.110455	1588	0.00124169	not_sig	256	84	7	13	282	73	4	1
chr19_34929937_A_G_b38	393	309	372	348	1.18979	0.11054	1589	0.00124247	not_sig	109	175	67	9	91	190	79	0
chr22_19850052_C_T_b38	445	271	477	243	0.836524	0.11054	1590	0.00124326	not_sig	145	155	58	2	157	163	40	0
chr17_50462402_C_A_b38	501	181	501	219	1.20994	0.110541	1591	0.00124404	not_sig	182	137	22	19	171	159	30	0
chr4_48342137_G_T_b38	465	237	506	214	0.829789	0.110558	1592	0.00124482	not_sig	151	163	37	9	179	148	33	0
chr19_51019035_G_C_b38	273	425	251	467	1.19513	0.110565	1593	0.0012456	not_sig	56	161	132	11	43	165	151	1
chr12_132717747_C_T_b38	657	63	674	46	0.711742	0.110568	1594	0.00124638	not_sig	300	57	3	0	315	44	1	0
chr11_67409427_A_G_b38	657	63	674	46	0.711742	0.110568	1595	0.00124717	not_sig	300	57	3	0	315	44	1	0
chr4_107720144_T_C_b38	63	657	46	672	1.40083	0.110589	1596	0.00124795	not_sig	2	59	299	0	0	46	313	1
chr4_8228047_C_T_b38	189	529	163	557	1.22088	0.110887	1597	0.00124873	not_sig	24	141	194	1	19	125	216	0
chr17_7014764_C_T_b38	608	112	626	90	0.780466	0.111114	1598	0.00124951	not_sig	254	100	6	0	274	78	6	2
chr7_102285204_C_G_b38	417	275	464	256	0.836614	0.111115	1599	0.00125029	not_sig	124	169	53	14	159	146	55	0
chr17_75828040_T_C_b38	476	244	446	274	1.19849	0.111255	1600	0.00125108	not_sig	160	156	44	0	136	174	50	0
chr1_180936558_C_T_b38	502	210	479	241	1.20272	0.111266	1601	0.00125186	not_sig	182	138	36	4	158	163	39	0
chrX_153954909_A_G_b38	565	155	578	128	0.807233	0.111402	1602	0.00125264	not_sig	251	63	46	0	266	46	41	7
chr10_49988768_A_AC_b38	564	148	528	170	1.22697	0.111561	1603	0.00125342	not_sig	208	148	0	4	194	140	15	11
chr10_47368767_C_T_b38	454	240	499	219	0.83021	0.111569	1604	0.0012542	not_sig	149	156	42	13	176	147	36	1
chr1_228486817_G_A_b38	381	337	413	307	0.840395	0.1116	1605	0.00125498	not_sig	103	175	81	1	114	185	61	0
chr20_38326388_G_A_b38	667	3	720	0	0	0.11173	1606	0.00125577	not_sig	332	3	0	25	360	0	0	0
chr9_129869883_G_GC_b38	71	645	54	666	1.35762	0.111889	1607	0.00125655	not_sig	2	67	289	2	3	48	309	0
chr11_65965818_G_A_b38	380	340	411	309	0.840275	0.112054	1608	0.00125733	not_sig	104	172	84	0	116	179	65	0
chr11_18701244_A_G_b38	545	153	587	133	0.807084	0.112311	1609	0.00125811	not_sig	208	129	12	11	238	111	11	0
chr1_113905767_C_T_b38	547	137	600	120	0.79854	0.112346	1610	0.00125889	not_sig	216	115	11	18	249	102	9	0
chr16_67284727_T_G_b38	689	31	701	19	0.602411	0.112495	1611	0.00125968	not_sig	332	25	3	0	342	17	1	0
chr6_32853214_A_G_b38	689	31	701	19	0.602411	0.112495	1612	0.00126046	not_sig	329	31	0	0	341	19	0	0
chr20_45542073_C_A_b38	91	625	113	607	0.782117	0.112597	1613	0.00126124	not_sig	7	77	274	2	8	97	255	0
chr11_63997337_C_T_b38	695	19	689	31	1.64579	0.112631	1614	0.00126202	not_sig	339	17	1	3	329	31	0	0
chr1_180271375_T_C_b38	680	40	664	56	1.43373	0.112632	1615	0.0012628	not_sig	322	36	2	0	307	50	3	0
chr16_3026330_C_T_b38	706	14	714	6	0.42377	0.112798	1616	0.00126359	not_sig	346	14	0	0	354	6	0	0
chr19_49428625_A_AAC_b38	714	6	706	14	2.35977	0.112798	1617	0.00126437	not_sig	354	6	0	0	346	14	0	0
chr16_27461451_C_T_b38	615	103	594	126	1.26655	0.112802	1618	0.00126515	not_sig	266	83	10	1	242	110	8	0
chr12_112965870_C_T_b38	710	6	706	14	2.34655	0.11282	1619	0.00126593	not_sig	352	6	0	2	346	14	0	0
chr19_55489529_G_T_b38	602	116	580	140	1.25268	0.11283	1620	0.00126671	not_sig	253	96	10	1	229	122	9	0
chr11_33700538_G_T_b38	508	196	465	217	1.20952	0.112832	1621	0.0012675	not_sig	180	148	24	8	153	159	29	19
chr7_44060774_C_T_b38	660	42	691	29	0.6595	0.112881	1622	0.00126828	not_sig	309	42	0	9	331	29	0	0
chr15_82345265_C_T_b38	694	26	689	15	0.58111	0.112942	1623	0.00126906	not_sig	334	26	0	0	337	15	0	8
chr13_75550015_C_T_b38	329	389	360	358	0.84106	0.113018	1624	0.00126984	not_sig	74	181	104	1	91	178	90	1
chr6_169667929_T_C_b38	645	71	629	91	1.31429	0.113034	1625	0.00127062	not_sig	289	67	2	2	276	77	7	0
chr9_127733611_A_C_b38	258	410	309	411	0.836988	0.113039	1626	0.00127141	not_sig	49	160	125	26	70	169	121	0
chr10_103584999_T_C_b38	354	366	322	394	1.18348	0.113085	1627	0.00127219	not_sig	96	162	102	0	73	176	109	2
chr6_42968260_G_A_b38	319	399	350	370	0.845184	0.113125	1628	0.00127297	not_sig	73	173	113	1	86	178	96	0
chr14_22766488_C_T_b38	360	358	392	328	0.841409	0.113184	1629	0.00127375	not_sig	83	194	82	1	113	166	81	0
chr15_55358813_G_A_b38	656	54	646	72	1.35397	0.113202	1630	0.00127453	not_sig	302	52	1	5	291	64	4	1
chr16_1964423_C_G_b38	363	355	333	387	1.18835	0.113379	1631	0.00127531	not_sig	100	163	96	1	80	173	107	0
chr17_39673317_C_G_b38	215	485	250	470	0.833402	0.113434	1632	0.0012761	not_sig	25	165	160	10	45	160	155	0
chr17_39673318_C_A_b38	215	485	250	470	0.833402	0.113434	1633	0.00127688	not_sig	25	165	160	10	45	160	155	0
chr14_22766599_G_A_b38	363	357	392	326	0.84561	0.113564	1634	0.00127766	not_sig	84	195	81	0	114	164	81	1
chr20_33660357_C_T_b38	527	189	502	218	1.21088	0.113824	1635	0.00127844	not_sig	194	139	25	2	179	144	37	0
chr15_45164908_G_T_b38	449	245	495	225	0.833024	0.113912	1636	0.00127922	not_sig	147	155	45	13	173	149	38	0
chr19_7623728_T_C_b38	616	104	593	127	1.26852	0.114029	1637	0.00128001	not_sig	262	92	6	0	247	99	14	0
chr7_102457563_G_A_b38	593	127	616	104	0.788322	0.114029	1638	0.00128079	not_sig	244	105	11	0	265	86	9	0
chr8_144522536_T_G_b38	346	374	375	343	0.846189	0.114062	1639	0.00128157	not_sig	88	170	102	0	94	187	78	1
chr11_65780418_C_G_b38	588	132	563	157	1.24221	0.114215	1640	0.00128235	not_sig	239	110	11	0	221	121	18	0
chr9_14737508_T_G_b38	194	524	168	552	1.21647	0.114253	1641	0.00128313	not_sig	26	142	191	1	17	134	209	0
chr9_87974101_A_G_b38	284	428	258	462	1.18822	0.114554	1642	0.00128392	not_sig	52	180	124	4	46	166	148	0
chr19_46016768_A_G_b38	149	571	175	545	0.812659	0.114556	1643	0.0012847	not_sig	14	121	225	0	23	129	208	0
chr17_44848191_C_T_b38	257	457	289	431	0.83868	0.114765	1644	0.00128548	not_sig	38	181	138	3	55	179	126	0
chr1_68137903_C_T_b38	427	285	461	259	0.841748	0.114802	1645	0.00128626	not_sig	129	169	58	4	154	153	53	0
chr19_50517646_A_G_b38	432	288	459	257	0.839869	0.114894	1646	0.00128704	not_sig	132	168	60	0	146	167	45	2
chr16_2971115_T_C_b38	191	473	180	540	1.21142	0.114897	1647	0.00128783	not_sig	23	145	164	28	26	128	206	0
chr11_60927903_A_G_b38	219	467	259	461	0.834696	0.114965	1648	0.00128861	not_sig	32	155	156	17	46	167	147	0
chr20_652904_GACCTCCCTCCTCCGGCA_G_b38	615	105	591	127	1.25864	0.115042	1649	0.00128939	not_sig	263	89	8	0	239	113	7	1
chr4_787932_T_C_b38	524	196	551	169	0.819993	0.115166	1650	0.00129017	not_sig	196	132	32	0	213	125	22	0
chr8_144393647_G_C_b38	258	462	288	432	0.837662	0.11519	1651	0.00129095	not_sig	43	172	145	0	64	160	136	0
chr5_177604347_T_C_b38	258	462	288	432	0.837662	0.11519	1652	0.00129174	not_sig	43	172	145	0	57	174	129	0
chr22_38089057_C_G_b38	429	291	455	259	0.839175	0.115277	1653	0.00129252	not_sig	133	163	64	0	146	163	48	3
chr16_31324585_T_C_b38	615	105	592	128	1.26641	0.115295	1654	0.0012933	not_sig	262	91	7	0	246	100	14	0
chr6_43263232_G_C_b38	500	220	471	249	1.20151	0.115323	1655	0.00129408	not_sig	178	144	38	0	161	149	50	0
chr12_171183_C_A_b38	500	220	528	192	0.826446	0.115349	1656	0.00129486	not_sig	177	146	37	0	188	152	20	0
chr8_22571238_C_G_b38	549	101	584	136	1.26583	0.115488	1657	0.00129564	not_sig	232	85	8	35	238	108	14	0
chr7_99672916_T_C_b38	64	650	48	672	1.37846	0.115504	1658	0.00129643	not_sig	1	62	294	3	1	46	313	0
chr6_7602624_C_T_b38	655	55	645	73	1.34785	0.115804	1659	0.00129721	not_sig	302	51	2	5	289	67	3	1
chr20_33562652_T_C_b38	683	3	720	0	0	0.115889	1660	0.00129799	not_sig	340	3	0	17	360	0	0	0
chr1_24138623_C_T_b38	429	291	459	261	0.838286	0.115954	1661	0.00129877	not_sig	124	181	55	0	152	155	53	0
chr11_73395249_A_C_b38	582	90	642	76	0.765524	0.11597	1662	0.00129955	not_sig	252	78	6	24	289	64	6	1
chr8_103300204_A_G_b38	519	197	547	171	0.823588	0.116044	1663	0.00130034	not_sig	185	149	24	2	211	125	23	1
chr4_47557985_C_A_b38	601	119	577	143	1.25166	0.11606	1664	0.00130112	not_sig	253	95	12	0	227	123	10	0
chr19_58437679_C_T_b38	544	170	522	198	1.21379	0.116078	1665	0.0013019	not_sig	210	124	23	3	189	144	27	0
chr19_35633274_A_G_b38	500	174	559	159	0.817346	0.116153	1666	0.00130268	not_sig	183	134	20	23	218	123	18	1
chr17_30560116_G_A_b38	675	41	663	57	1.41541	0.11623	1667	0.00130346	not_sig	317	41	0	2	305	53	2	0
chr7_134575603_G_A_b38	716	4	708	10	2.52825	0.116304	1668	0.00130425	not_sig	356	4	0	0	349	10	0	1
chr6_26598570_G_A_b38	634	64	671	49	0.723407	0.116383	1669	0.00130503	not_sig	289	56	4	11	312	47	1	0
chr15_89652777_C_T_b38	512	196	547	173	0.826176	0.116471	1670	0.00130581	not_sig	185	142	27	6	208	131	21	0
chr17_42111459_G_A_b38	716	4	709	11	2.77715	0.116557	1671	0.00130659	not_sig	356	4	0	0	349	11	0	0
chr2_74101312_G_C_b38	709	11	716	4	0.360081	0.116557	1672	0.00130737	not_sig	349	11	0	0	356	4	0	0
chr11_126211508_T_C_b38	496	224	467	253	1.1996	0.116901	1673	0.00130816	not_sig	177	142	41	0	151	165	44	0
chr16_1219029_T_C_b38	295	425	265	455	1.19179	0.11693	1674	0.00130894	not_sig	58	179	123	0	54	157	149	0
chr2_233681970_C_A_b38	425	295	455	265	0.839076	0.11693	1675	0.00130972	not_sig	126	173	61	0	143	169	48	0
chr5_129095064_T_C_b38	266	450	296	422	0.842733	0.117004	1676	0.0013105	not_sig	48	170	140	2	60	176	123	1
chr22_21015387_G_C_b38	413	297	449	271	0.839299	0.117011	1677	0.00131128	not_sig	117	179	59	5	144	161	55	0
chr9_137462269_C_T_b38	708	12	698	22	1.8596	0.117046	1678	0.00131207	not_sig	348	12	0	0	339	20	1	0
chr12_20916115_G_A_b38	677	35	668	50	1.44782	0.117235	1679	0.00131285	not_sig	321	35	0	4	311	46	2	1
chr5_180845935_A_G_b38	134	568	162	558	0.812598	0.117278	1680	0.00131363	not_sig	14	106	231	9	19	124	217	0
chr11_83248562_A_G_b38	537	173	516	202	1.21515	0.117861	1681	0.00131441	not_sig	204	129	22	5	187	142	30	1
chr10_97662891_A_G_b38	426	274	408	312	1.18892	0.117972	1682	0.00131519	not_sig	130	166	54	10	117	174	69	0
chr5_157460125_A_G_b38	493	227	464	256	1.19824	0.118049	1683	0.00131597	not_sig	169	155	36	0	150	164	46	0
chr1_26201318_A_C_b38	544	174	519	201	1.21082	0.118495	1684	0.00131676	not_sig	208	128	23	1	189	141	30	0
chr16_1211219_A_G_b38	302	418	272	448	1.18998	0.118521	1685	0.00131754	not_sig	59	184	117	0	56	160	144	0
chr16_1211119_G_A_b38	302	418	272	448	1.18998	0.118521	1686	0.00131832	not_sig	59	184	117	0	56	160	144	0
chr9_129620420_C_G_b38	694	18	699	9	0.496423	0.118567	1687	0.0013191	not_sig	338	18	0	4	345	9	0	6
chr1_161306153_C_T_b38	702	18	709	9	0.495063	0.118582	1688	0.00131988	not_sig	342	18	0	0	350	9	0	1
chr19_7682243_G_C_b38	626	94	646	74	0.762861	0.11863	1689	0.00132067	not_sig	274	78	8	0	291	64	5	0
chr8_23103191_G_C_b38	137	581	162	556	0.80929	0.11871	1690	0.00132145	not_sig	15	107	237	1	19	124	216	1
chr1_228268446_T_C_b38	197	467	242	478	0.833224	0.118887	1691	0.00132223	not_sig	37	123	172	28	50	142	168	0
chr9_136952816_G_A_b38	697	9	700	18	1.99143	0.118896	1692	0.00132301	not_sig	344	9	0	7	343	14	2	1
chr20_25282133_G_A_b38	559	119	569	151	1.24661	0.118904	1693	0.00132379	not_sig	229	101	9	21	222	125	13	0
chr8_74361906_T_G_b38	457	259	487	231	0.83695	0.119007	1694	0.00132458	not_sig	141	175	42	2	164	159	36	1
chr17_47831287_T_A_b38	695	3	720	0	0	0.119011	1695	0.00132536	not_sig	346	3	0	11	360	0	0	0
chr22_38067645_T_G_b38	263	389	260	460	1.19616	0.119114	1696	0.00132614	not_sig	58	147	121	34	41	178	141	0
chr21_26844126_A_C_b38	153	535	186	534	0.821043	0.119347	1697	0.00132692	not_sig	13	127	204	16	22	142	196	0
chr6_31947837_G_A_b38	700	20	688	32	1.62791	0.119469	1698	0.0013277	not_sig	340	20	0	0	329	30	1	0
chr3_51980470_G_A_b38	698	20	688	32	1.62326	0.119479	1699	0.00132849	not_sig	339	20	0	1	329	30	1	0
chr16_50233358_T_G_b38	688	32	698	20	0.616046	0.119479	1700	0.00132927	not_sig	328	32	0	0	339	20	0	1
chr1_232950710_T_C_b38	519	179	561	159	0.821767	0.119485	1701	0.00133005	not_sig	195	129	25	11	216	129	15	0
chr19_17781669_A_G_b38	48	606	38	682	1.42157	0.119761	1702	0.00133083	not_sig	3	42	282	33	3	32	325	0
chr12_48925017_G_A_b38	659	57	645	75	1.34435	0.12042	1703	0.00133161	not_sig	305	49	4	2	288	69	3	0
chr10_97611587_C_A_b38	518	202	490	230	1.20368	0.120454	1704	0.0013324	not_sig	188	142	30	0	171	148	41	0
chr16_71568762_C_T_b38	701	3	720	0	0	0.120573	1705	0.00133318	not_sig	349	3	0	8	360	0	0	0
chr5_69320252_G_A_b38	704	16	693	27	1.71429	0.12061	1706	0.00133396	not_sig	344	16	0	0	334	25	1	0
chr19_843687_C_G_b38	693	27	704	16	0.583333	0.12061	1707	0.00133474	not_sig	333	27	0	0	344	16	0	0
chr12_10409426_C_T_b38	202	512	231	489	0.835177	0.120767	1708	0.00133552	not_sig	33	136	188	3	38	155	167	0
chr19_1811604_C_T_b38	482	230	515	205	0.834192	0.12093	1709	0.0013363	not_sig	163	156	37	4	181	153	26	0
chr14_94100213_C_T_b38	348	332	338	382	1.18464	0.120942	1710	0.00133709	not_sig	87	174	79	20	81	176	103	0
chr2_241768062_T_C_b38	536	114	616	104	0.793803	0.121003	1711	0.00133787	not_sig	218	100	7	35	261	94	5	0
chr3_3038927_G_C_b38	659	49	654	66	1.35724	0.121022	1712	0.00133865	not_sig	306	47	1	6	300	54	6	0
chr21_38819507_T_G_b38	119	601	97	623	1.27171	0.121037	1713	0.00133943	not_sig	12	95	253	0	6	85	269	0
chr20_49812971_G_C_b38	362	330	407	313	0.843616	0.121142	1714	0.00134021	not_sig	92	178	76	14	116	175	69	0
chr14_24368462_G_C_b38	535	145	589	129	0.808091	0.121248	1715	0.001341	not_sig	208	119	13	20	244	101	14	1
chr1_156728554_C_A_b38	580	140	554	164	1.22641	0.121296	1716	0.00134178	not_sig	230	120	10	0	213	128	18	1
chr19_2252991_C_G_b38	543	137	550	170	1.22508	0.121312	1717	0.00134256	not_sig	214	115	11	20	208	134	18	0
chr1_228283345_C_T_b38	453	265	483	237	0.838791	0.121394	1718	0.00134334	not_sig	151	151	57	1	166	151	43	0
chr16_31219142_C_T_b38	204	516	232	488	0.831596	0.121429	1719	0.00134412	not_sig	24	156	180	0	30	172	158	0
chr16_67390509_T_A_b38	682	38	695	25	0.645589	0.121465	1720	0.00134491	not_sig	322	38	0	0	336	23	1	0
chr11_65041572_C_T_b38	512	208	475	231	1.19709	0.12162	1721	0.00134569	not_sig	177	158	25	0	160	155	38	7
chr2_132038355_A_AAGG_b38	428	288	431	243	0.837877	0.121972	1722	0.00134647	not_sig	129	170	59	2	141	149	47	23
chrX_153766384_T_C_b38	568	148	593	125	0.808988	0.122069	1723	0.00134725	not_sig	254	60	44	2	272	49	38	1
chr17_41977224_T_G_b38	707	3	720	0	0	0.122135	1724	0.00134803	not_sig	352	3	0	5	360	0	0	0
chrX_152767196_C_A_b38	584	134	598	110	0.801677	0.122209	1725	0.00134882	not_sig	266	52	41	1	277	44	33	6
chr2_218690539_G_A_b38	394	306	375	345	1.18458	0.122414	1726	0.0013496	not_sig	105	184	61	10	97	181	82	0
chr19_58001258_G_T_b38	670	50	653	67	1.37489	0.122467	1727	0.00135038	not_sig	311	48	1	0	295	63	2	0
chr3_15038076_G_A_b38	709	3	720	0	0	0.122656	1728	0.00135116	not_sig	353	3	0	4	360	0	0	0
chr1_153631636_G_A_b38	325	395	295	425	1.18537	0.122703	1729	0.00135194	not_sig	80	165	115	0	57	181	122	0
chr19_55482873_C_T_b38	295	425	325	395	0.84362	0.122703	1730	0.00135272	not_sig	58	179	123	0	69	187	104	0
chr2_218275662_A_G_b38	639	49	652	68	1.36009	0.122762	1731	0.00135351	not_sig	297	45	2	16	293	66	1	0
chr11_119019100_C_T_b38	662	58	644	76	1.34697	0.122791	1732	0.00135429	not_sig	305	52	3	0	287	70	3	0
chr8_51320750_T_G_b38	520	180	508	212	1.2056	0.122816	1733	0.00135507	not_sig	197	126	27	10	179	150	31	0
chr19_39927135_G_A_b38	677	43	661	59	1.40531	0.123004	1734	0.00135585	not_sig	320	37	3	0	304	53	3	0
chr15_43632410_T_C_b38	556	132	605	115	0.800651	0.1231	1735	0.00135663	not_sig	224	108	12	16	251	103	6	0
chr16_4332270_G_A_b38	711	3	720	0	0	0.123177	1736	0.00135742	not_sig	354	3	0	3	360	0	0	0
chr17_80385509_C_T_b38	629	75	659	59	0.750855	0.123242	1737	0.0013582	not_sig	281	67	4	8	302	55	2	1
chrX_34656853_C_G_b38	524	188	545	161	0.823385	0.12334	1738	0.00135898	not_sig	229	66	61	4	243	59	51	7
chr8_143315859_A_G_b38	300	420	330	390	0.844156	0.123403	1739	0.00135976	not_sig	63	174	123	0	74	182	104	0
chr15_78764184_TC_T_b38	159	541	189	531	0.82572	0.123448	1740	0.00136054	not_sig	22	115	213	10	21	147	192	0
chr16_88715809_G_A_b38	653	67	634	86	1.32205	0.123511	1741	0.00136133	not_sig	299	55	6	0	279	76	5	0
chr3_183162707_C_A_b38	508	164	568	150	0.818018	0.123703	1742	0.00136211	not_sig	186	136	14	24	224	120	15	1
chr3_44918905_A_T_b38	713	5	719	1	0.198331	0.123828	1743	0.00136289	not_sig	354	5	0	1	359	1	0	0
chr22_25201364_T_C_b38	344	364	320	400	1.18132	0.123947	1744	0.00136367	not_sig	80	184	90	6	75	170	115	0
chr5_180313827_T_C_b38	577	143	551	167	1.22294	0.123953	1745	0.00136445	not_sig	233	111	16	0	215	121	23	1
chr9_137710903_A_C_b38	363	339	342	378	1.18351	0.123959	1746	0.00136524	not_sig	90	183	78	9	85	172	103	0
chr10_73913973_C_T_b38	336	382	307	413	1.18328	0.123995	1747	0.00136602	not_sig	84	168	107	1	59	189	112	0
chrX_48832339_C_T_b38	568	84	631	71	0.760848	0.124065	1748	0.0013668	not_sig	267	34	25	34	297	37	17	9
chr16_30734655_C_T_b38	597	95	641	79	0.774497	0.124085	1749	0.00136758	not_sig	261	75	10	14	287	67	6	0
chr12_6868081_G_A_b38	719	1	714	6	6.04202	0.124088	1750	0.00136836	not_sig	359	1	0	0	354	6	0	0
chr16_67271087_C_T_b38	715	3	720	0	0	0.124219	1751	0.00136915	not_sig	356	3	0	1	360	0	0	0
chr11_66335575_C_T_b38	3	715	0	720	inf	0.124219	1752	0.00136993	not_sig	0	3	356	1	0	0	360	0
chr17_75896519_G_A_b38	689	31	672	44	1.45526	0.124233	1753	0.00137071	not_sig	331	27	2	0	315	42	1	2
chr22_39319603_C_T_b38	645	17	706	10	0.53741	0.124296	1754	0.00137149	not_sig	314	17	0	29	348	10	0	2
chr16_31465137_C_T_b38	411	309	381	339	1.18347	0.124475	1755	0.00137227	not_sig	114	183	63	0	98	185	77	0
chr2_219515105_A_G_b38	720	0	716	4	inf	0.124479	1756	0.00137305	not_sig	360	0	0	0	356	4	0	0
chr6_31145046_T_C_b38	720	0	716	4	inf	0.124479	1757	0.00137384	not_sig	360	0	0	0	356	4	0	0
chr16_29383086_G_C_b38	716	4	716	0	0	0.124483	1758	0.00137462	not_sig	356	4	0	0	358	0	0	2
chr7_144258999_C_T_b38	698	4	694	0	0	0.124487	1759	0.0013754	not_sig	347	4	0	9	347	0	0	13
chr19_21294601_T_G_b38	548	168	576	144	0.815476	0.12452	1760	0.00137618	not_sig	208	132	18	2	231	114	15	0
chr19_35678012_T_C_b38	331	375	366	352	0.848903	0.124571	1761	0.00137696	not_sig	73	185	95	7	92	182	85	1
chr6_73242380_A_C_b38	591	127	569	151	1.23495	0.124593	1762	0.00137775	not_sig	245	101	13	1	220	129	11	0
chr11_124897171_T_C_b38	513	187	554	166	0.822004	0.124671	1763	0.00137853	not_sig	183	147	20	10	212	130	18	0
chr8_143309755_T_C_b38	311	409	341	379	0.845127	0.12468	1764	0.00137931	not_sig	69	173	118	0	77	187	96	0
chr6_32222629_A_G_b38	444	276	473	247	0.840059	0.124923	1765	0.00138009	not_sig	139	166	55	0	152	169	39	0
chr19_44288548_T_G_b38	346	372	317	403	1.18244	0.124964	1766	0.00138087	not_sig	92	162	105	1	64	189	107	0
chr1_152216523_G_A_b38	701	19	657	9	0.505407	0.125006	1767	0.00138166	not_sig	341	19	0	0	324	9	0	27
chr17_8048501_A_G_b38	323	389	356	364	0.848993	0.125142	1768	0.00138244	not_sig	72	179	105	4	90	176	94	0
chr1_183186093_C_A_b38	584	136	607	113	0.799399	0.125153	1769	0.00138322	not_sig	237	110	13	0	254	99	7	0
chr19_33800378_C_G_b38	358	290	428	292	0.842217	0.125241	1770	0.001384	not_sig	93	172	59	36	133	162	65	0
chr16_28609251_C_T_b38	384	334	353	363	1.18227	0.125437	1771	0.00138478	not_sig	96	192	71	1	83	187	88	2
chr17_78803713_G_A_b38	326	394	355	363	0.846057	0.125583	1772	0.00138557	not_sig	74	178	108	0	84	187	88	1
chr13_75760682_C_T_b38	367	353	397	323	0.84587	0.125666	1773	0.00138635	not_sig	101	165	94	0	111	175	74	0
chr19_38501000_C_G_b38	526	132	599	121	0.804953	0.125671	1774	0.00138713	not_sig	211	104	14	31	248	103	9	0
chr11_129947096_A_G_b38	633	87	652	68	0.758832	0.125673	1775	0.00138791	not_sig	276	81	3	0	295	62	3	0
chr14_20404581_G_A_b38	633	87	650	68	0.761167	0.125705	1776	0.00138869	not_sig	277	79	4	0	295	60	4	1
chr9_131026432_C_A_b38	580	136	606	114	0.802271	0.125725	1777	0.00138948	not_sig	243	94	21	2	261	84	15	0
chr17_69021789_T_C_b38	665	27	691	17	0.605939	0.125735	1778	0.00139026	not_sig	320	25	1	14	337	17	0	6
chr2_219038536_T_G_b38	164	556	190	530	0.822794	0.125935	1779	0.00139104	not_sig	19	126	215	0	29	132	199	0
chr22_25846262_C_T_b38	654	0	714	4	inf	0.126086	1780	0.00139182	not_sig	327	0	0	33	355	4	0	1
chr17_50548567_C_G_b38	469	251	440	280	1.18906	0.126137	1781	0.0013926	not_sig	151	167	42	0	135	170	55	0
chr16_66579938_G_C_b38	642	78	622	98	1.29681	0.126169	1782	0.00139338	not_sig	284	74	2	0	265	92	3	0
chr14_73729983_T_C_b38	415	281	458	262	0.844846	0.126204	1783	0.00139417	not_sig	122	171	55	12	142	174	44	0
chr17_19334300_C_T_b38	518	148	584	136	0.815068	0.126212	1784	0.00139495	not_sig	201	116	16	27	238	108	14	0
chr12_6463421_G_C_b38	533	187	506	214	1.20545	0.126323	1785	0.00139573	not_sig	198	137	25	0	177	152	31	0
chr8_25423284_C_G_b38	546	164	528	192	1.21064	0.12638	1786	0.00139651	not_sig	214	118	23	5	194	140	26	0
chr2_219547560_T_G_b38	692	22	707	13	0.578372	0.12638	1787	0.00139729	not_sig	336	20	1	3	348	11	1	0
chr20_3238389_G_A_b38	660	60	676	44	0.715976	0.126401	1788	0.00139808	not_sig	303	54	3	0	316	44	0	0
chr16_57987491_A_C_b38	120	560	105	615	1.2551	0.126504	1789	0.00139886	not_sig	12	96	232	20	9	87	264	0
chr3_119586322_G_A_b38	610	110	631	89	0.782164	0.126551	1790	0.00139964	not_sig	261	88	11	0	278	75	7	0
chr4_8228343_T_C_b38	191	529	165	555	1.21447	0.126655	1791	0.00140042	not_sig	24	143	193	0	18	129	213	0
chr17_82752221_G_T_b38	626	90	599	109	1.2657	0.127064	1792	0.0014012	not_sig	272	82	4	2	255	89	10	6
chr9_113360674_A_G_b38	531	169	569	149	0.822776	0.127098	1793	0.00140199	not_sig	195	141	14	10	225	119	15	1
chr6_136600981_A_G_b38	678	18	710	10	0.530516	0.127165	1794	0.00140277	not_sig	330	18	0	12	350	10	0	0
chr10_3148307_A_T_b38	599	85	649	71	0.770942	0.127388	1795	0.00140355	not_sig	260	79	3	18	293	63	4	0
chr11_66332516_C_T_b38	217	503	245	475	0.83641	0.127401	1796	0.00140433	not_sig	34	149	177	0	50	145	165	0
chr10_133419430_C_T_b38	217	495	247	473	0.839496	0.127535	1797	0.00140511	not_sig	39	139	178	4	39	169	152	0
chr4_186076613_C_A_b38	566	154	590	130	0.809817	0.1276	1798	0.0014059	not_sig	221	124	15	0	242	106	12	0
chr5_79990596_C_T_b38	692	14	713	7	0.485273	0.127622	1799	0.00140668	not_sig	339	14	0	7	353	7	0	0
chr1_979847_A_G_b38	13	707	23	697	0.557223	0.127643	1800	0.00140746	not_sig	0	13	347	0	0	23	337	0
chr16_12803665_G_A_b38	703	13	697	23	1.78446	0.127684	1801	0.00140824	not_sig	345	13	0	2	337	23	0	0
chr7_92536548_C_T_b38	701	13	697	23	1.77938	0.127745	1802	0.00140902	not_sig	344	13	0	3	337	23	0	0
chr2_219535229_A_G_b38	571	147	548	172	1.21918	0.127758	1803	0.00140981	not_sig	229	113	17	1	208	132	20	0
chr2_160005583_G_A_b38	271	393	324	396	0.842805	0.128094	1804	0.00141059	not_sig	61	149	122	28	75	174	111	0
chr9_122093051_G_GTGGCCT_b38	526	194	549	167	0.824761	0.128253	1805	0.00141137	not_sig	189	148	23	0	215	119	24	2
chr18_35041267_A_G_b38	219	499	247	473	0.840442	0.128391	1806	0.00141215	not_sig	36	147	176	1	45	157	158	0
chr8_144397708_C_T_b38	259	461	288	432	0.842733	0.128408	1807	0.00141293	not_sig	44	171	145	0	64	160	136	0
chr8_144397883_C_T_b38	259	461	288	432	0.842733	0.128408	1808	0.00141371	not_sig	44	171	145	0	64	160	136	0
chr12_109586736_A_G_b38	525	193	552	168	0.827889	0.128518	1809	0.0014145	not_sig	191	143	25	1	212	128	20	0
chr14_24269173_T_C_b38	542	136	599	121	0.805043	0.128541	1810	0.00141528	not_sig	218	106	15	21	255	89	16	0
chr11_709680_T_C_b38	276	384	331	389	0.844694	0.128582	1811	0.00141606	not_sig	60	156	114	30	71	189	100	0
chr2_235053566_T_C_b38	581	85	647	73	0.771216	0.128633	1812	0.00141684	not_sig	250	81	2	27	288	71	1	0
chr17_4555007_C_A_b38	155	557	132	584	1.23116	0.128743	1813	0.00141762	not_sig	12	131	213	4	13	106	239	2
chr20_35384111_C_T_b38	292	418	267	453	1.18521	0.129117	1814	0.00141841	not_sig	62	168	125	5	53	161	146	0
chr16_71475731_G_C_b38	501	219	528	192	0.83188	0.129176	1815	0.00141919	not_sig	173	155	32	0	195	138	27	0
chr2_27581565_T_C_b38	343	377	285	371	1.18435	0.129241	1816	0.00141997	not_sig	87	169	104	0	54	177	97	32
chr4_1728488_C_G_b38	563	155	588	132	0.815405	0.129347	1817	0.00142075	not_sig	220	123	16	1	240	108	12	0
chr17_45257282_C_A_b38	310	338	375	345	0.843787	0.129447	1818	0.00142153	not_sig	69	172	83	36	103	169	88	0
chr6_2680498_C_T_b38	615	103	595	125	1.25439	0.129456	1819	0.00142232	not_sig	263	89	7	1	247	101	12	0
chr1_111423669_C_T_b38	491	219	525	195	0.832746	0.129468	1820	0.0014231	not_sig	169	153	33	5	190	145	25	0
chr4_787768_G_C_b38	525	195	551	169	0.825771	0.129484	1821	0.00142388	not_sig	196	133	31	0	213	125	22	0
chr17_45034320_G_A_b38	494	222	469	251	1.1909	0.129537	1822	0.00142466	not_sig	171	152	35	2	153	163	44	0
chr3_195726143_G_A_b38	648	70	628	88	1.29718	0.129615	1823	0.00142544	not_sig	291	66	2	1	270	88	0	2
chr13_52378545_G_A_b38	688	32	674	46	1.46736	0.129675	1824	0.00142623	not_sig	330	28	2	0	316	42	2	0
chr11_64757744_C_T_b38	88	630	70	650	1.29705	0.129682	1825	0.00142701	not_sig	7	74	278	1	4	62	294	0
chr11_65046213_G_C_b38	674	46	686	32	0.683483	0.12969	1826	0.00142779	not_sig	317	40	3	0	327	32	0	1
chr20_21333538_T_G_b38	674	46	686	32	0.683483	0.12969	1827	0.00142857	not_sig	317	40	3	0	327	32	0	1
chr16_1827697_C_G_b38	608	112	629	91	0.785374	0.12974	1828	0.00142935	not_sig	256	96	8	0	271	87	2	0
chr16_1940993_T_C_b38	525	193	500	220	1.19689	0.129842	1829	0.00143014	not_sig	194	137	28	1	169	162	29	0
chr21_46215799_G_A_b38	222	492	251	469	0.843115	0.129922	1830	0.00143092	not_sig	37	148	172	3	40	171	149	0
chr12_7367230_A_G_b38	618	88	649	71	0.76828	0.129956	1831	0.0014317	not_sig	273	72	8	7	295	59	6	0
chr16_88700882_C_T_b38	544	174	570	150	0.822747	0.129957	1832	0.00143248	not_sig	206	132	21	1	226	118	16	0
chr16_1218494_C_T_b38	294	426	265	455	1.18496	0.129974	1833	0.00143326	not_sig	59	176	125	0	54	157	149	0
chr2_26185195_T_C_b38	28	692	17	687	1.63516	0.130076	1834	0.00143404	not_sig	0	28	332	0	0	17	335	8
chr6_116571676_C_T_b38	510	152	579	141	0.817085	0.130084	1835	0.00143483	not_sig	199	112	20	29	231	117	12	0
chr17_39423831_A_G_b38	665	39	691	27	0.666258	0.130164	1836	0.00143561	not_sig	313	39	0	8	333	25	1	1
chr10_72340884_G_A_b38	295	425	266	454	1.1847	0.130224	1837	0.00143639	not_sig	74	147	139	0	51	164	145	0
chr2_97219026_T_C_b38	533	129	555	165	1.22837	0.130256	1838	0.00143717	not_sig	221	91	19	29	212	131	17	0
chr17_30824687_C_T_b38	596	88	634	72	0.769143	0.130386	1839	0.00143795	not_sig	262	72	8	18	284	66	3	7
chr12_49018926_G_A_b38	424	296	451	267	0.848025	0.130642	1840	0.00143874	not_sig	133	158	69	0	140	171	48	1
chr12_2486066_G_A_b38	713	7	705	15	2.16717	0.130827	1841	0.00143952	not_sig	353	7	0	0	345	15	0	0
chr8_143867664_C_T_b38	705	15	713	7	0.461431	0.130827	1842	0.0014403	not_sig	345	15	0	0	353	7	0	0
chr16_2099590_T_C_b38	666	38	666	54	1.42105	0.130846	1843	0.00144108	not_sig	315	36	1	8	308	50	2	0
chr1_32780201_C_G_b38	603	99	638	82	0.782844	0.131003	1844	0.00144186	not_sig	258	87	6	9	281	76	3	0
chr12_52007103_G_A_b38	705	15	703	7	0.467994	0.131016	1845	0.00144265	not_sig	345	15	0	0	348	7	0	5
chr6_26393259_C_T_b38	650	70	667	53	0.737845	0.131139	1846	0.00144343	not_sig	293	64	3	0	309	49	2	0
chr16_27749719_C_T_b38	650	70	667	53	0.737845	0.131139	1847	0.00144421	not_sig	294	62	4	0	308	51	1	0
chr12_6831328_G_A_b38	655	21	686	34	1.54588	0.131312	1848	0.00144499	not_sig	317	21	0	22	326	34	0	0
chr2_113197656_C_T_b38	607	113	628	92	0.786934	0.131319	1849	0.00144577	not_sig	253	101	6	0	277	74	9	0
chr16_3015595_T_C_b38	449	271	420	300	1.18345	0.131423	1850	0.00144656	not_sig	137	175	48	0	117	186	57	0
chr10_63185604_G_A_b38	156	542	137	583	1.22482	0.131451	1851	0.00144734	not_sig	22	112	215	11	13	111	236	0
chr7_75423283_C_T_b38	341	323	399	321	0.849345	0.131469	1852	0.00144812	not_sig	95	151	86	28	103	193	64	0
chr16_84294888_C_T_b38	575	141	601	119	0.80746	0.131597	1853	0.0014489	not_sig	230	115	13	2	254	93	13	0
chr16_687793_G_A_b38	487	195	540	180	0.832479	0.131739	1854	0.00144968	not_sig	173	141	27	19	210	120	30	0
chr1_16206308_G_A_b38	485	223	520	200	0.836495	0.1319	1855	0.00145047	not_sig	162	161	31	6	192	136	32	0
chr18_57571588_A_G_b38	660	46	687	33	0.689197	0.132002	1856	0.00145125	not_sig	311	38	4	7	327	33	0	0
chr6_26285105_T_C_b38	671	13	697	23	1.70323	0.132127	1857	0.00145203	not_sig	329	13	0	18	337	23	0	0
chr2_24119662_G_A_b38	549	123	610	110	0.804878	0.132193	1858	0.00145281	not_sig	222	105	9	24	260	90	10	0
chr10_5394523_C_T_b38	665	13	696	24	1.76393	0.132596	1859	0.00145359	not_sig	326	13	0	21	337	22	1	0
chr14_103100683_T_C_b38	512	172	511	207	1.20584	0.132604	1860	0.00145437	not_sig	196	120	26	18	180	151	28	1
chr19_57492120_A_G_b38	462	258	488	230	0.843976	0.132885	1861	0.00145516	not_sig	149	164	47	0	162	164	33	1
chr19_7928074_T_C_b38	677	39	666	54	1.40748	0.133085	1862	0.00145594	not_sig	319	39	0	2	307	52	1	0
chr19_7932759_G_A_b38	677	39	666	54	1.40748	0.133085	1863	0.00145672	not_sig	319	39	0	2	307	52	1	0
chr1_156937323_T_C_b38	458	258	488	232	0.843945	0.133094	1864	0.0014575	not_sig	149	160	49	2	164	160	36	0
chr17_7830515_A_G_b38	308	410	280	440	1.18049	0.133111	1865	0.00145828	not_sig	72	164	123	1	51	178	131	0
chr12_122585671_G_A_b38	686	34	698	22	0.635935	0.133112	1866	0.00145907	not_sig	326	34	0	0	338	22	0	0
chr2_36925229_A_C_b38	614	38	691	29	0.678117	0.133122	1867	0.00145985	not_sig	290	34	2	34	332	27	1	0
chr22_43212525_C_T_b38	673	23	706	14	0.580244	0.133448	1868	0.00146063	not_sig	325	23	0	12	346	14	0	0
chr4_48341676_G_A_b38	493	227	520	200	0.83531	0.133524	1869	0.00146141	not_sig	167	159	34	0	189	142	29	0
chr3_187371243_C_A_b38	452	260	485	235	0.842347	0.133537	1870	0.00146219	not_sig	143	166	47	4	159	167	34	0
chr12_120151356_A_G_b38	136	584	160	560	0.815068	0.133564	1871	0.00146298	not_sig	9	118	233	0	14	132	214	0
chr17_79097652_A_G_b38	475	201	473	239	1.19408	0.133596	1872	0.00146376	not_sig	168	139	31	22	162	149	45	4
chr10_97850261_C_T_b38	690	28	651	39	1.4763	0.133759	1873	0.00146454	not_sig	331	28	0	1	306	39	0	15
chr1_35386920_G_T_b38	573	87	644	76	0.777254	0.133818	1874	0.00146532	not_sig	251	71	8	30	287	70	3	0
chr19_16325451_T_C_b38	146	574	156	502	0.818503	0.133853	1875	0.0014661	not_sig	17	112	231	0	19	118	192	31
chr15_39587316_C_T_b38	519	201	492	228	1.19658	0.134049	1876	0.00146689	not_sig	187	145	28	0	172	148	40	0
chr14_103561220_C_T_b38	234	462	270	450	0.844156	0.134063	1877	0.00146767	not_sig	35	164	149	12	46	178	136	0
chr1_156876441_G_A_b38	576	136	559	161	1.21983	0.134122	1878	0.00146845	not_sig	238	100	18	4	214	131	15	0
chr1_169732760_T_C_b38	629	91	648	72	0.76801	0.134161	1879	0.00146923	not_sig	276	77	7	0	289	70	1	0
chr20_1478415_T_G_b38	91	629	72	648	1.30207	0.134161	1880	0.00147001	not_sig	8	75	277	0	5	62	293	0
chr1_223802921_G_A_b38	618	38	691	29	0.682535	0.134173	1881	0.0014708	not_sig	291	36	1	32	331	29	0	0
chr9_113580788_C_T_b38	687	33	673	47	1.45387	0.134317	1882	0.00147158	not_sig	328	31	1	0	313	47	0	0
chr14_23310425_C_G_b38	33	687	47	673	0.687819	0.134317	1883	0.00147236	not_sig	1	31	328	0	1	45	314	0
chr16_75566587_G_C_b38	625	61	670	48	0.734035	0.13475	1884	0.00147314	not_sig	287	51	5	17	313	44	2	1
chr6_73242264_T_G_b38	561	155	540	180	1.20645	0.134845	1885	0.00147392	not_sig	217	127	14	2	203	134	23	0
chr19_5908958_G_A_b38	597	115	623	95	0.791611	0.134996	1886	0.0014747	not_sig	252	93	11	4	275	73	11	1
chr11_67634891_T_G_b38	490	230	517	203	0.836515	0.135086	1887	0.00147549	not_sig	167	156	37	0	187	143	30	0
chr11_67634164_G_C_b38	490	230	517	203	0.836515	0.135086	1888	0.00147627	not_sig	167	156	37	0	187	143	30	0
chr10_86681336_G_A_b38	643	13	696	24	1.70557	0.135102	1889	0.00147705	not_sig	315	13	0	32	337	22	1	0
chr22_37568292_C_G_b38	319	401	290	430	1.17955	0.135254	1890	0.00147783	not_sig	77	165	118	0	55	180	125	0
chr16_2088669_TAA_T_b38	632	62	638	82	1.31014	0.135311	1891	0.00147861	not_sig	287	58	2	13	281	76	3	0
chr18_41962442_GAT_G_b38	394	270	455	263	0.843484	0.135354	1892	0.0014794	not_sig	117	160	55	28	138	179	42	1
chr9_136410572_G_A_b38	548	162	504	180	1.20811	0.135355	1893	0.00148018	not_sig	212	124	19	5	190	124	28	18
chr7_106112245_G_A_b38	552	168	480	176	1.20476	0.135387	1894	0.00148096	not_sig	211	130	19	0	174	132	22	32
chr12_25209618_A_C_b38	319	393	342	358	0.849679	0.13539	1895	0.00148174	not_sig	74	171	111	4	87	168	95	10
chr19_1224287_G_T_b38	582	138	558	162	1.2244	0.1355	1896	0.00148252	not_sig	237	108	15	0	217	124	19	0
chr22_50294798_C_T_b38	496	178	555	165	0.828424	0.135651	1897	0.00148331	not_sig	180	136	21	23	212	131	17	0
chr3_16317077_T_C_b38	293	427	322	398	0.848139	0.135754	1898	0.00148409	not_sig	66	161	133	0	67	188	105	0
chr3_134607842_G_A_b38	239	481	267	453	0.843024	0.136087	1899	0.00148487	not_sig	40	159	161	0	49	169	142	0
chr6_31636233_C_G_b38	515	205	488	232	1.19432	0.136107	1900	0.00148565	not_sig	177	161	22	0	168	152	40	0
chr2_74455385_C_T_b38	590	130	612	108	0.800905	0.136131	1901	0.00148643	not_sig	237	116	7	0	258	96	6	0
chr19_49594675_G_C_b38	562	158	534	182	1.2123	0.136193	1902	0.00148722	not_sig	219	124	17	0	199	136	23	2
chr16_66512079_C_T_b38	623	53	647	73	1.32627	0.136237	1903	0.001488	not_sig	285	53	0	22	288	71	1	0
chr7_151034611_C_T_b38	647	73	628	92	1.2984	0.136243	1904	0.00148878	not_sig	293	61	6	0	273	82	5	0
chr14_20403687_A_G_b38	621	95	604	116	1.25542	0.136271	1905	0.00148956	not_sig	268	85	5	2	256	92	12	0
chr19_2214058_C_T_b38	269	449	241	477	1.18579	0.13649	1906	0.00149034	not_sig	44	181	134	1	39	163	157	1
chr20_13091168_C_T_b38	629	71	664	56	0.747158	0.136563	1907	0.00149113	not_sig	281	67	2	10	310	44	6	0
chr19_3641674_C_T_b38	298	420	327	393	0.85273	0.136734	1908	0.00149191	not_sig	72	154	133	1	80	167	113	0
chr19_49594527_T_C_b38	562	158	537	183	1.21215	0.136759	1909	0.00149269	not_sig	218	126	16	0	200	137	23	0
chr15_40367991_C_T_b38	628	92	641	73	0.777386	0.136775	1910	0.00149347	not_sig	272	84	4	0	290	61	6	3
chr3_9810375_C_CGAT_b38	64	656	81	635	0.76483	0.136813	1911	0.00149425	not_sig	1	62	297	0	6	69	283	2
chr12_9107684_T_C_b38	326	372	364	354	0.852269	0.136817	1912	0.00149503	not_sig	75	176	98	11	88	188	83	1
chr1_228216497_G_A_b38	691	29	702	18	0.610964	0.137283	1913	0.00149582	not_sig	331	29	0	0	342	18	0	0
chr3_14146199_T_C_b38	246	434	289	431	0.845327	0.137383	1914	0.0014966	not_sig	52	142	146	20	63	163	134	0
chr3_46712486_T_C_b38	357	349	393	327	0.851134	0.137581	1915	0.00149738	not_sig	87	183	83	7	105	183	72	0
chr12_26916050_A_T_b38	697	23	676	34	1.52418	0.137685	1916	0.00149816	not_sig	337	23	0	0	321	34	0	5
chr10_100913306_G_T_b38	410	310	380	338	1.1764	0.137783	1917	0.00149894	not_sig	115	180	65	0	97	186	76	1
chr22_32358299_G_A_b38	690	18	691	29	1.60878	0.1379	1918	0.00149973	not_sig	336	18	0	6	331	29	0	0
chr16_67877614_T_C_b38	573	147	596	124	0.810985	0.137913	1919	0.00150051	not_sig	231	111	18	0	246	104	10	0
chr16_89696855_T_C_b38	340	378	312	408	1.17623	0.137995	1920	0.00150129	not_sig	76	188	95	1	64	184	112	0
chr11_3129161_C_T_b38	609	103	635	85	0.791453	0.138001	1921	0.00150207	not_sig	255	99	2	4	278	79	3	0
chr17_7847618_A_G_b38	696	24	706	14	0.575071	0.138001	1922	0.00150285	not_sig	337	22	1	0	346	14	0	0
chr4_185378842_A_G_b38	678	34	697	23	0.65803	0.138072	1923	0.00150364	not_sig	323	32	1	4	337	23	0	0
chr10_87022343_G_C_b38	678	34	697	23	0.65803	0.138072	1924	0.00150442	not_sig	322	34	0	4	337	23	0	0
chr5_178964901_A_C_b38	209	511	236	484	0.838801	0.138099	1925	0.0015052	not_sig	30	149	181	0	44	148	168	0
chr3_53226887_G_C_b38	564	122	569	151	1.22683	0.138122	1926	0.00150598	not_sig	230	104	9	17	221	127	12	0
chr1_54228541_G_A_b38	509	209	484	236	1.18751	0.138222	1927	0.00150676	not_sig	179	151	29	1	163	158	39	0
chr16_57761482_G_A_b38	236	482	210	510	1.18909	0.138313	1928	0.00150755	not_sig	41	154	164	1	32	146	182	0
chr17_4735268_G_A_b38	377	343	406	314	0.850062	0.138469	1929	0.00150833	not_sig	94	189	77	0	112	182	66	0
chr19_49590315_A_G_b38	554	160	533	185	1.20181	0.138689	1930	0.00150911	not_sig	215	124	18	3	199	135	25	1
chr1_75732751_T_C_b38	466	236	503	215	0.844004	0.138792	1931	0.00150989	not_sig	155	156	40	9	170	163	26	1
chr19_21294577_C_T_b38	535	185	556	160	0.832199	0.138859	1932	0.00151067	not_sig	201	133	26	0	216	124	18	2
chr16_3458012_A_C_b38	674	34	689	23	0.661743	0.138875	1933	0.00151146	not_sig	321	32	1	6	333	23	0	4
chr1_151401549_T_C_b38	576	108	584	136	1.24201	0.138957	1934	0.00151224	not_sig	243	90	9	18	240	104	16	0
chr1_113738095_A_C_b38	277	411	262	458	1.17815	0.13898	1935	0.00151302	not_sig	54	169	121	16	41	180	139	0
chr12_48924763_G_A_b38	400	318	373	347	1.17018	0.139067	1936	0.0015138	not_sig	119	162	78	1	88	197	75	0
chr11_293188_T_C_b38	482	238	509	211	0.839527	0.139071	1937	0.00151458	not_sig	157	168	35	0	191	127	42	0
chr14_73523155_C_T_b38	211	505	239	481	0.840888	0.139101	1938	0.00151536	not_sig	29	153	176	2	43	153	164	0
chr4_75957803_G_A_b38	432	276	467	253	0.847966	0.139135	1939	0.00151615	not_sig	139	154	61	6	158	151	51	0
chr15_63157344_A_C_b38	372	340	347	371	1.16979	0.139135	1940	0.00151693	not_sig	100	172	84	4	79	189	91	1
chr19_55228147_T_C_b38	276	444	248	472	1.18309	0.139138	1941	0.00151771	not_sig	54	168	138	0	42	164	154	0
chr11_2922441_G_C_b38	554	166	578	142	0.819902	0.139295	1942	0.00151849	not_sig	213	128	19	0	237	104	19	0
chr5_134115992_C_A_b38	621	93	645	75	0.776444	0.13934	1943	0.00151927	not_sig	271	79	7	3	289	67	4	0
chr11_63304712_C_T_b38	672	48	655	63	1.34656	0.139394	1944	0.00152006	not_sig	313	46	1	0	299	57	3	1
chr17_75878603_G_C_b38	553	117	599	101	0.796955	0.139456	1945	0.00152084	not_sig	230	93	12	25	258	83	9	10
chr2_26461629_C_T_b38	697	23	684	34	1.50636	0.139495	1946	0.00152162	not_sig	338	21	1	0	325	34	0	1
chr8_144504344_C_A_b38	361	359	390	330	0.850868	0.139622	1947	0.0015224	not_sig	92	177	91	0	109	172	79	0
chr11_65868088_G_A_b38	369	349	341	379	1.17513	0.139683	1948	0.00152318	not_sig	91	187	81	1	86	169	105	0
chr11_6477985_A_G_b38	361	359	332	388	1.17519	0.139711	1949	0.00152397	not_sig	90	181	89	0	79	174	107	0
chr20_31861522_C_G_b38	442	278	470	250	0.845706	0.139777	1950	0.00152475	not_sig	129	184	47	0	152	166	42	0
chr5_173235021_T_C_b38	445	239	496	224	0.840869	0.139795	1951	0.00152553	not_sig	139	167	36	18	172	152	36	0
chr8_144524754_T_C_b38	355	365	384	336	0.851027	0.139851	1952	0.00152631	not_sig	88	179	93	0	106	172	82	0
chr2_113641568_G_A_b38	407	281	454	266	0.848621	0.139922	1953	0.00152709	not_sig	128	151	65	16	145	164	51	0
chr16_67657765_A_G_b38	352	368	381	339	0.851078	0.139925	1954	0.00152788	not_sig	82	188	90	0	100	181	79	0
chr19_54200852_C_G_b38	185	533	211	509	0.837298	0.140143	1955	0.00152866	not_sig	23	139	197	1	26	159	175	0
chr1_2408761_T_C_b38	126	592	149	571	0.81564	0.1402	1956	0.00152944	not_sig	12	102	245	1	17	115	228	0
chr12_55637827_A_G_b38	548	102	628	92	0.787061	0.140267	1957	0.00153022	not_sig	228	92	5	35	275	78	7	0
chr9_112890746_C_T_b38	597	73	617	97	1.2857	0.140322	1958	0.001531	not_sig	265	67	3	25	266	85	6	3
chr19_38500903_G_A_b38	664	48	656	64	1.34959	0.140326	1959	0.00153179	not_sig	308	48	0	4	298	60	2	0
chr20_33031694_C_T_b38	621	85	614	106	1.26128	0.140349	1960	0.00153257	not_sig	275	71	7	7	258	98	4	0
chr19_29812807_T_TC_b38	280	432	255	463	1.17683	0.140374	1961	0.00153335	not_sig	52	176	128	4	44	167	148	1
chr11_67607110_T_C_b38	411	283	453	265	0.849578	0.140544	1962	0.00153413	not_sig	109	193	45	13	141	171	47	1
chr17_76307751_G_C_b38	534	186	508	212	1.19812	0.140658	1963	0.00153491	not_sig	200	134	26	0	181	146	33	0
chr12_6458621_T_C_b38	534	186	508	212	1.19812	0.140658	1964	0.00153569	not_sig	200	134	26	0	178	152	30	0
chr9_133257521_T_TC_b38	463	253	438	282	1.17824	0.140675	1965	0.00153648	not_sig	150	163	45	2	133	172	55	0
chr3_53186113_G_T_b38	679	41	664	56	1.39671	0.140697	1966	0.00153726	not_sig	319	41	0	0	305	54	1	0
chr11_116791691_G_C_b38	664	56	677	41	0.718084	0.140717	1967	0.00153804	not_sig	308	48	4	0	318	41	0	1
chr11_65121562_G_A_b38	707	11	715	5	0.44946	0.140821	1968	0.00153882	not_sig	348	11	0	1	355	5	0	0
chr7_24815146_G_A_b38	501	211	532	188	0.839076	0.140943	1969	0.0015396	not_sig	171	159	26	4	201	130	29	0
chr8_143810814_C_T_b38	715	5	708	12	2.42373	0.141097	1970	0.00154039	not_sig	355	5	0	0	348	12	0	0
chr1_157099342_G_A_b38	715	5	708	12	2.42373	0.141097	1971	0.00154117	not_sig	355	5	0	0	348	12	0	0
chr15_101737277_G_C_b38	530	188	556	164	0.831548	0.141154	1972	0.00154195	not_sig	195	140	24	1	214	128	18	0
chr15_79463343_GGT_G_b38	592	84	610	110	1.27088	0.14121	1973	0.00154273	not_sig	258	76	4	22	262	86	12	0
chr19_50512317_G_C_b38	507	213	533	187	0.835108	0.141273	1974	0.00154351	not_sig	180	147	33	0	201	131	28	0
chr20_63967462_C_T_b38	437	283	465	255	0.846803	0.141314	1975	0.0015443	not_sig	132	173	55	0	148	169	43	0
chr8_11803255_G_C_b38	608	112	586	134	1.24135	0.141349	1976	0.00154508	not_sig	257	94	9	0	241	104	15	0
chr11_65622419_G_C_b38	364	296	426	294	0.848687	0.141458	1977	0.00154586	not_sig	98	168	64	30	118	190	52	0
chr8_144399250_C_T_b38	464	256	436	284	1.18062	0.141611	1978	0.00154664	not_sig	146	172	42	0	139	158	63	0
chr17_75891915_A_G_b38	654	66	635	83	1.2952	0.142023	1979	0.00154742	not_sig	298	58	4	0	281	73	5	1
chr16_50699948_C_G_b38	423	287	457	263	0.8482	0.142183	1980	0.00154821	not_sig	131	161	63	5	136	185	39	0
chr5_10680885_G_A_b38	646	74	663	57	0.75052	0.142351	1981	0.00154899	not_sig	288	70	2	0	305	53	2	0
chr19_17521012_G_A_b38	675	23	685	35	1.49952	0.142517	1982	0.00154977	not_sig	327	21	1	11	325	35	0	0
chr19_16865478_T_C_b38	605	113	585	135	1.23553	0.14269	1983	0.00155055	not_sig	258	89	12	1	231	123	6	0
chr10_123009067_G_A_b38	435	263	420	298	1.17355	0.142807	1984	0.00155133	not_sig	135	165	49	11	126	168	65	1
chr19_58394796_T_C_b38	361	301	421	299	0.851785	0.14284	1985	0.00155212	not_sig	95	171	65	29	122	177	61	0
chr20_3889432_T_A_b38	655	65	671	49	0.735871	0.142905	1986	0.0015529	not_sig	298	59	3	0	314	43	3	0
chr17_80227887_C_T_b38	706	8	717	3	0.369247	0.142936	1987	0.00155368	not_sig	349	8	0	3	357	3	0	0
chr16_66580105_T_C_b38	638	76	625	95	1.276	0.142956	1988	0.00155446	not_sig	283	72	2	3	267	91	2	0
chr20_45252989_A_G_b38	574	146	550	170	1.21519	0.142989	1989	0.00155524	not_sig	224	126	10	0	212	126	22	0
chr17_46872859_T_C_b38	578	92	640	80	0.785326	0.143025	1990	0.00155602	not_sig	256	66	13	25	283	74	3	0
chr22_36261743_T_C_b38	293	413	270	448	1.17715	0.143351	1991	0.00155681	not_sig	61	171	121	7	46	178	135	1
chr6_32843868_A_G_b38	677	41	691	29	0.692986	0.143368	1992	0.00155759	not_sig	318	41	0	1	332	27	1	0
chr1_35574361_T_G_b38	671	29	689	19	0.638056	0.143463	1993	0.00155837	not_sig	323	25	2	10	335	19	0	6
chr15_48141109_A_T_b38	677	5	708	12	2.29492	0.143539	1994	0.00155915	not_sig	336	5	0	19	349	10	1	0
chr12_52676337_T_G_b38	135	583	114	606	1.23093	0.143626	1995	0.00155993	not_sig	13	109	237	1	11	92	257	0
chr9_133779957_G_C_b38	482	220	468	252	1.17972	0.14368	1996	0.00156072	not_sig	165	152	34	9	149	170	41	0
chr14_24177263_T_C_b38	616	100	599	121	1.24434	0.143861	1997	0.0015615	not_sig	265	86	7	2	248	103	9	0
chr3_45966210_T_C_b38	320	334	323	397	1.17758	0.143861	1998	0.00156228	not_sig	79	162	86	33	79	165	116	0
[truncated: 10,791 more rows]

## Sheet: SuppTable2.SPARK-gnomAD results
Supplemental Table 2. SPARK-gnomAD Experimental Results
Variant ID	Ref Alleles SPARK	Alt Alleles SPARK	Ref Alleles gnomAD	Alt Alleles gnomAD	Odds Ratio	pvalue	Rank	Critical Value	Sig Check
chr11_207359_C_CGGCCACAGCCGCCTCAGACGT_b38	698	0	13136	50470	inf	0	1	7.73216e-07	sig
chr17_19015197_A_ACGGTACGGGGGTGGGGGC_b38	690	0	10384	48318	inf	0	2	1.54643e-06	sig
chr15_75358681_C_CCCACATGCTGCCCAGCCCATA_b38	696	6	16613	47003	328.198	0	3	2.31965e-06	sig
chr11_67494811_C_CGA_b38	436	220	323	59657	366.035	0	4	3.09286e-06	sig
chr1_155235878_G_T_b38	162	486	104	63158	202.429	1.41293e-257	5	3.86608e-06	sig
chr9_87919241_T_TTCTTGTCTCCCAGCGTCA_b38	716	2	29718	32544	392.044	6.22819e-224	6	4.63929e-06	sig
chr1_205065724_A_ATGGCCTGCTGCACTGGTCAGGGCCGGTGGTC_b38	703	1	31595	31637	703.935	2.60251e-208	7	5.41251e-06	sig
chr20_49568145_G_GCGGGGCTGGCGGGGCTGA_b38	685	1	37443	25035	458.002	2.02838e-149	8	6.18573e-06	sig
chr11_71538079_A_AGGCTGTGGCTCCGGCTGTGGG_b38	714	6	36207	23917	78.607	1.20314e-144	9	6.95894e-06	sig
chr7_4861834_G_GCACGTCCCCCACCACCGCGACCTT_b38	699	1	39580	23754	419.506	9.38061e-140	10	7.73216e-06	sig
chr6_30920003_C_CTGGGGCGGTGCAGGTGA_b38	641	63	29983	33669	11.4254	3.03994e-135	11	8.50537e-06	sig
chr5_6714741_T_TGGTCCTGGCCGGCGCCCGC_b38	666	0	44096	19496	inf	1.09719e-105	12	9.27859e-06	sig
chr19_57859906_G_T_b38	607	109	62641	761	0.0676532	3.47194e-79	13	1.00518e-05	sig
chr19_54336886_A_G_b38	630	86	59541	499	0.0613941	2.18604e-66	14	1.0825e-05	sig
chr1_152709204_C_CAGCTCTGGGGGCTGCTGT_b38	428	292	18218	45294	3.64419	4.10605e-65	15	1.15982e-05	sig
chr6_3003476_C_T_b38	651	5	49554	13238	34.782	1.65842e-58	16	1.23715e-05	sig
chr18_12254563_C_CCCGCGCACACACCCAT_b38	586	134	33709	29981	3.88949	1.0351e-56	17	1.31447e-05	sig
chr16_55832988_T_C_b38	654	0	50299	8861	inf	3.1298e-46	18	1.39179e-05	sig
chr7_102554519_G_A_b38	562	144	48907	2819	0.224956	1.09007e-41	19	1.46911e-05	sig
chr12_10420495_C_G_b38	393	323	20750	40526	2.37632	2.65412e-30	20	1.54643e-05	sig
chr2_112542424_TTCCGGCGTGTACCGAGAGACTGGCG_T_b38	720	0	59005	4803	inf	7.60846e-25	21	1.62375e-05	sig
chr11_22193357_G_C_b38	234	450	11957	51853	2.25504	1.64113e-21	22	1.70107e-05	sig
chr12_50352116_G_C_b38	720	0	55901	2985	inf	1.64679e-16	23	1.7784e-05	sig
chr19_12577507_AAATGTTCCTGGTGAGAGAAGCG_A_b38	637	69	50001	13755	2.53964	1.68686e-16	24	1.85572e-05	sig
chr6_29944174_C_T_b38	625	79	43502	2018	0.366999	1.89748e-13	25	1.93304e-05	sig
chr11_71796159_C_T_b38	679	41	59441	859	0.239328	3.57366e-13	26	2.01036e-05	sig
chr22_49923336_T_TCTGCACTCCGGGGC_b38	599	57	51742	12084	2.45425	4.36241e-13	27	2.08768e-05	sig
chr22_40861830_T_TA_b38	698	22	63656	262	0.130585	1.86343e-12	28	2.165e-05	sig
chr20_1915454_C_T_b38	489	165	39318	24482	1.84536	1.91478e-12	29	2.24233e-05	sig
chr7_72942052_G_A_b38	720	0	55773	2083	inf	8.08559e-12	30	2.31965e-05	sig
chr15_82344656_T_G_b38	683	33	57654	666	0.239085	5.83838e-11	31	2.39697e-05	sig
chr3_50378211_A_C_b38	672	18	63702	212	0.124245	8.24429e-11	32	2.47429e-05	sig
chr8_144392334_T_TGGGGGTGCAAGGTGA_b38	390	330	27116	36518	1.59159	7.14819e-10	33	2.55161e-05	sig
chr3_50326340_G_A_b38	695	17	63612	210	0.134963	8.85095e-10	34	2.62893e-05	sig
chr17_7219921_T_TGGGCGTGCAGGACGC_b38	379	341	26259	37425	1.58405	9.79689e-10	35	2.70626e-05	sig
chr13_32402471_A_G_b38	625	61	52816	10950	2.12422	9.82244e-10	36	2.78358e-05	sig
chr17_81119342_C_CCGCGTGCCCTACCTCT_b38	169	549	9510	54106	1.75138	1.70476e-09	37	2.8609e-05	sig
chr19_54747326_G_A_b38	398	282	27733	31379	1.59689	1.82172e-09	38	2.93822e-05	sig
chr3_50274469_C_T_b38	703	17	63690	220	0.142843	1.97369e-09	39	3.01554e-05	sig
chr11_1243877_C_T_b38	668	48	59170	1538	0.361735	3.13646e-09	40	3.09286e-05	sig
chr1_152216523_G_A_b38	701	19	58848	302	0.189339	1.81149e-08	41	3.17018e-05	sig
chr2_95895658_A_G_b38	668	2	61085	2255	12.3299	1.98847e-08	42	3.24751e-05	sig
chr19_49464815_G_A_b38	649	9	63860	60	0.0677524	3.68801e-08	43	3.32483e-05	sig
chr6_29943579_G_A_b38	646	72	30769	6459	1.88344	6.00121e-08	44	3.40215e-05	sig
chr6_31394993_C_T_b38	528	120	39725	15293	1.69388	6.30736e-08	45	3.47947e-05	sig
chr2_107859502_A_G_b38	273	439	18282	45018	1.5313	7.54347e-08	46	3.55679e-05	sig
chr1_35894068_A_G_b38	697	23	63366	540	0.258251	1.39643e-07	47	3.63411e-05	sig
chr16_89686659_GGGCCGTCCGCGTCTGCGCCTGCGCGCAAGAGA_G_b38	688	18	59367	4521	2.91075	1.69758e-07	48	3.71144e-05	sig
chr5_141194596_CAGGCCG_C_b38	521	171	35347	18057	1.55645	3.11831e-07	49	3.78876e-05	sig
chrX_149933788_A_G_b38	703	3	48123	1554	7.56715	8.80655e-07	50	3.86608e-05	sig
chr1_34761705_C_A_b38	712	8	63848	60	0.0836361	9.36903e-07	51	3.9434e-05	sig
chr14_104948913_G_C_b38	697	21	49822	406	0.27047	1.00929e-06	52	4.02072e-05	sig
chr1_1668542_C_T_b38	591	121	47854	15658	1.59816	1.09809e-06	53	4.09804e-05	sig
chr16_88864955_A_AGGGAG_b38	459	229	35933	26519	1.47925	1.16191e-06	54	4.17537e-05	sig
chr10_17129266_G_C_b38	13	703	210	63714	5.61053	1.53961e-06	55	4.25269e-05	sig
chrX_153772646_G_C_b38	533	127	43537	6285	0.605857	1.65476e-06	56	4.33001e-05	sig
chr7_102380580_T_C_b38	672	16	58133	3855	2.78517	3.13016e-06	57	4.40733e-05	sig
chr20_1769344_A_G_b38	689	13	63668	234	0.194792	3.85139e-06	58	4.48465e-05	sig
chr7_1498978_G_A_b38	446	234	33464	25332	1.44281	4.93258e-06	59	4.56197e-05	sig
chr2_112501339_C_T_b38	470	182	39623	22597	1.47275	6.39804e-06	60	4.63929e-05	sig
chr7_100995773_G_A_b38	408	274	30591	29051	1.41409	9.06457e-06	61	4.71662e-05	sig
chr7_144258999_C_T_b38	698	4	63344	10	0.027548	1.3119e-05	62	4.79394e-05	sig
chr17_81716967_T_TGCCTCACCCCTG_b38	534	184	42451	21107	1.44299	1.33286e-05	63	4.87126e-05	sig
chr3_149542293_C_T_b38	711	9	63790	118	0.146136	1.38663e-05	64	4.94858e-05	sig
chr10_87000460_A_G_b38	499	185	51018	12856	0.679691	1.54852e-05	65	5.0259e-05	sig
chr7_48309904_C_T_b38	688	6	63858	44	0.0790086	1.60022e-05	66	5.10322e-05	sig
chr4_158680524_C_T_b38	133	573	8378	55522	1.53823	1.97887e-05	67	5.18055e-05	sig
chr19_10446221_C_T_b38	631	83	59333	4567	0.585175	2.09508e-05	68	5.25787e-05	sig
chr9_65737984_G_C_b38	329	375	24127	38019	1.38249	2.20941e-05	69	5.33519e-05	sig
chr19_49819225_C_G_b38	712	8	63818	96	0.133881	2.2966e-05	70	5.41251e-05	sig
chrX_91835436_C_T_b38	713	5	49981	20	0.0570617	2.35552e-05	71	5.48983e-05	sig
chr22_19714751_C_T_b38	699	9	63389	129	0.158056	2.4784e-05	72	5.56715e-05	sig
chr19_10359299_A_C_b38	576	90	58366	5530	0.60638	3.12352e-05	73	5.64448e-05	sig
chr12_14771094_A_G_b38	502	188	50708	13180	0.69404	3.7775e-05	74	5.7218e-05	sig
chr7_102497055_C_A_b38	501	165	45254	10156	0.681427	4.36833e-05	75	5.79912e-05	sig
chr17_8189376_T_G_b38	166	554	10917	52965	1.45373	4.432e-05	76	5.87644e-05	sig
chr7_106030821_T_C_b38	656	14	63552	360	0.265429	4.54198e-05	77	5.95376e-05	sig
chr8_125056644_T_C_b38	539	181	51796	12090	0.695089	4.65958e-05	78	6.03108e-05	sig
chr7_100789190_G_C_b38	713	7	63840	78	0.12445	4.80853e-05	79	6.1084e-05	sig
chr14_104587923_A_G_b38	584	94	58066	5786	0.619073	5.17142e-05	80	6.18573e-05	sig
chr1_1439454_A_G_b38	527	193	50651	13063	0.70422	5.32425e-05	81	6.26305e-05	sig
chr9_35906522_G_A_b38	541	119	44255	14445	1.4839	6.09912e-05	82	6.34037e-05	sig
chr17_81670337_C_G_b38	524	196	50526	13380	0.707973	6.11519e-05	83	6.41769e-05	sig
chr22_43129170_C_T_b38	145	575	9325	54549	1.47516	6.69454e-05	84	6.49501e-05	not_sig
chr17_6996240_C_G_b38	5	715	34	63850	13.1325	7.13487e-05	85	6.57233e-05	not_sig
chr6_33173384_A_G_b38	151	569	17526	46278	0.700739	7.60687e-05	86	6.64966e-05	not_sig
chr1_35574361_T_G_b38	671	29	62718	1156	0.426472	8.53162e-05	87	6.72698e-05	not_sig
chr19_54595125_A_G_b38	709	11	63673	227	0.229786	8.58255e-05	88	6.8043e-05	not_sig
chrX_153765882_A_C_b38	575	145	42596	7352	0.684442	8.8598e-05	89	6.88162e-05	not_sig
chr17_8144851_T_C_b38	152	568	9952	53914	1.44973	0.000104154	90	6.95894e-05	not_sig
chr17_50096356_A_G_b38	405	243	44511	19349	0.724503	0.000108102	91	7.03626e-05	not_sig
chr7_75437428_A_T_b38	702	4	63894	20	0.0549347	0.000126154	92	7.11359e-05	not_sig
chr1_1426261_C_T_b38	506	190	50249	13499	0.715436	0.000130037	93	7.19091e-05	not_sig
chr8_17232055_T_C_b38	226	434	17469	46311	1.38049	0.00013265	94	7.26823e-05	not_sig
chr1_12938878_C_G_b38	644	72	48584	8590	1.58144	0.000140642	95	7.34555e-05	not_sig
chr1_229342020_A_G_b38	605	59	54908	8788	1.64119	0.000141354	96	7.42287e-05	not_sig
chr17_75904826_C_T_b38	685	1	62302	1098	12.0723	0.000160262	97	7.50019e-05	not_sig
chr19_50015959_G_A_b38	707	5	63854	42	0.0930059	0.000167688	98	7.57751e-05	not_sig
chr1_1288005_G_C_b38	664	28	62626	1178	0.446068	0.000174774	99	7.65484e-05	not_sig
chr7_102473107_C_T_b38	661	17	39383	2341	2.31124	0.000180493	100	7.73216e-05	not_sig
chr9_128163632_A_C_b38	683	5	63815	45	0.0963253	0.000193283	101	7.80948e-05	not_sig
chr17_41977224_T_G_b38	707	3	63910	8	0.0294998	0.00020399	102	7.8868e-05	not_sig
chr6_3264253_T_C_b38	164	556	11079	52791	1.40549	0.000205603	103	7.96412e-05	not_sig
chr6_33167615_A_G_b38	144	546	17233	46461	0.711046	0.000205697	104	8.04144e-05	not_sig
chrX_153783936_A_G_b38	564	156	41975	8195	0.705851	0.000209621	105	8.11877e-05	not_sig
chr7_100684915_G_A_b38	585	135	48137	15739	1.41684	0.000210091	106	8.19609e-05	not_sig
chr1_1480990_T_C_b38	608	58	58059	3185	0.575063	0.000212235	107	8.27341e-05	not_sig
chr3_46712486_T_C_b38	357	349	36668	27124	0.756675	0.000236489	108	8.35073e-05	not_sig
chr6_33080825_C_A_b38	354	354	36182	27402	0.757338	0.00024638	109	8.42805e-05	not_sig
chr6_3264268_G_C_b38	164	556	11103	52781	1.40219	0.000249198	110	8.50537e-05	not_sig
chr16_75566587_G_C_b38	625	61	60389	3481	0.590604	0.00026105	111	8.5827e-05	not_sig
chr11_308314_T_C_b38	406	314	40175	23541	0.757644	0.000261421	112	8.66002e-05	not_sig
chr22_40410091_G_GTGTC_b38	581	139	54700	9130	0.697662	0.000268117	113	8.73734e-05	not_sig
chr19_45406745_G_T_b38	539	149	53452	10404	0.704107	0.00027548	114	8.81466e-05	not_sig
chr17_8229445_T_C_b38	167	545	11515	52365	1.39347	0.000283928	115	8.89198e-05	not_sig
chr17_81671775_C_T_b38	561	153	53258	10306	0.70954	0.000286163	116	8.9693e-05	not_sig
chr1_1402457_A_G_b38	551	163	52707	11145	0.714786	0.000291554	117	9.04662e-05	not_sig
chr1_151760859_T_G_b38	405	269	33518	29622	1.33057	0.00030218	118	9.12395e-05	not_sig
chr20_33083857_T_C_b38	415	277	42459	21327	0.752538	0.000309559	119	9.20127e-05	not_sig
chr6_33168798_C_T_b38	204	514	22127	41485	0.744107	0.000328673	120	9.27859e-05	not_sig
chr19_57840921_G_A_b38	102	612	6357	57227	1.50037	0.00034041	121	9.35591e-05	not_sig
chr17_19533874_T_C_b38	432	280	42272	20706	0.755734	0.000352461	122	9.43323e-05	not_sig
chr1_1395346_A_G_b38	558	162	52876	11030	0.718515	0.000352651	123	9.51055e-05	not_sig
chrX_153952914_C_A_b38	539	129	43174	7171	0.693995	0.000358336	124	9.58788e-05	not_sig
chr2_74463251_C_T_b38	578	128	55310	8536	0.696897	0.000371446	125	9.6652e-05	not_sig
chr6_3264292_C_T_b38	164	556	11169	52633	1.38999	0.000379202	126	9.74252e-05	not_sig
chr19_39027075_C_T_b38	486	184	50057	13837	0.730122	0.000404153	127	9.81984e-05	not_sig
chr1_236538853_G_A_b38	246	410	19781	44091	1.33737	0.000422253	128	9.89716e-05	not_sig
chr17_81667744_A_T_b38	565	153	53514	10370	0.715597	0.000439638	129	9.97448e-05	not_sig
chr6_31411338_G_A_b38	486	216	47957	15877	0.744902	0.000442079	130	0.000100518	not_sig
chr17_50097544_C_T_b38	436	252	44487	19369	0.753286	0.000457066	131	0.000101291	not_sig
chr1_155047234_A_C_b38	414	290	41658	22206	0.760982	0.000458246	132	0.000102064	not_sig
chr1_1312114_T_C_b38	170	550	11629	51755	1.37561	0.000484212	133	0.000102838	not_sig
chr6_31968891_T_C_b38	165	553	18430	45452	0.735845	0.000489535	134	0.000103611	not_sig
chr20_3889432_T_A_b38	655	65	60209	3689	0.617412	0.000528322	135	0.000104384	not_sig
chr1_16206308_G_A_b38	485	223	47478	16370	0.749882	0.000531185	136	0.000105157	not_sig
chr12_12786617_T_G_b38	362	328	29239	34623	1.30688	0.00053793	137	0.000105931	not_sig
chr9_137575667_A_G_b38	536	184	51014	12884	0.735713	0.000541692	138	0.000106704	not_sig
chr5_149772049_G_A_b38	707	3	63900	12	0.0442567	0.000544522	139	0.000107477	not_sig
chrX_153766384_T_C_b38	568	148	42126	7892	0.718991	0.000545439	140	0.00010825	not_sig
chr16_31066088_A_G_b38	130	590	14965	48923	0.720324	0.000546254	141	0.000109023	not_sig
chr12_48970608_G_A_b38	313	349	34501	29351	0.762975	0.000556592	142	0.000109797	not_sig
chr1_151615803_T_A_b38	13	705	382	63536	3.06698	0.000559247	143	0.00011057	not_sig
chr16_29798352_ATTTC_A_b38	598	72	51305	9399	1.52157	0.00056017	144	0.000111343	not_sig
chr1_1468592_C_CG_b38	638	60	60372	3464	0.610115	0.000562891	145	0.000112116	not_sig
chr4_186171864_G_T_b38	338	352	27088	36770	1.30344	0.000563761	146	0.00011289	not_sig
chrX_53426253_C_T_b38	651	15	49052	405	0.358334	0.000586248	147	0.000113663	not_sig
chr2_74472651_C_A_b38	584	128	55345	8545	0.704428	0.000590101	148	0.000114436	not_sig
chr17_40994032_A_G_b38	479	235	46603	17263	0.75504	0.000593458	149	0.000115209	not_sig
chr7_100633241_G_C_b38	715	5	63832	56	0.125454	0.000602548	150	0.000115982	not_sig
chr15_71814880_A_C_b38	676	4	63885	33	0.0872975	0.000610065	151	0.000116756	not_sig
chr16_2210566_C_T_b38	410	292	33137	30731	1.30216	0.000621476	152	0.000117529	not_sig
chr3_44918905_A_T_b38	713	5	63845	57	0.127311	0.000640857	153	0.000118302	not_sig
chr14_104877981_G_A_b38	256	430	27892	35808	0.764314	0.000655699	154	0.000119075	not_sig
chr11_64789660_C_T_b38	670	50	61218	2656	0.581371	0.000682608	155	0.000119848	not_sig
chr17_36169010_A_C_b38	617	55	57932	3094	0.599134	0.000740717	156	0.000120622	not_sig
chrX_16858857_G_A_b38	365	321	29834	20169	0.768707	0.000744633	157	0.000121395	not_sig
chr17_8264282_T_C_b38	214	506	15433	48405	1.32649	0.000745739	158	0.000122168	not_sig
chr6_31928196_C_G_b38	526	138	53774	10100	0.715905	0.000749829	159	0.000122941	not_sig
chrX_153766385_G_C_b38	571	147	42153	7850	0.723369	0.000780309	160	0.000123715	not_sig
chr3_42875019_C_A_b38	717	3	63886	14	0.0523745	0.000833654	161	0.000124488	not_sig
chr19_45420395_A_G_b38	388	300	39983	23829	0.770799	0.000866136	162	0.000125261	not_sig
chr22_45289121_A_G_b38	360	334	37173	26683	0.773683	0.000867241	163	0.000126034	not_sig
chr19_9297487_G_A_b38	579	83	58299	5553	0.664457	0.000870852	164	0.000126807	not_sig
chr16_29383086_G_C_b38	716	4	62864	34	0.0968122	0.000884785	165	0.000127581	not_sig
chr9_135549839_G_GC_b38	540	176	44466	19280	1.33033	0.000904509	166	0.000128354	not_sig
chrX_47224638_A_G_b38	715	5	50218	48	0.136684	0.000908127	167	0.000129127	not_sig
chr9_121326453_A_G_b38	638	16	63293	619	0.389974	0.000909296	168	0.0001299	not_sig
chr1_220755034_T_C_b38	703	11	63600	306	0.307487	0.00091055	169	0.000130673	not_sig
chrX_49062215_C_T_b38	7	707	102	49939	4.84751	0.000914323	170	0.000131447	not_sig
chr1_1285574_G_A_b38	678	42	61678	2174	0.568997	0.000921542	171	0.00013222	not_sig
chr19_13904898_C_A_b38	505	185	50171	13701	0.745451	0.000923881	172	0.000132993	not_sig
chr1_21842693_A_G_b38	690	22	60119	3745	1.95374	0.000926474	173	0.000133766	not_sig
chr2_74505288_T_G_b38	592	128	55298	8536	0.713932	0.000943163	174	0.00013454	not_sig
chr11_3088173_A_G_b38	182	532	19865	43881	0.755697	0.0009853	175	0.000135313	not_sig
chr14_50905385_C_G_b38	492	160	51541	12313	0.734609	0.000988114	176	0.000136086	not_sig
chr19_871033_G_A_b38	661	59	56155	7723	1.5408	0.00100525	177	0.000136859	not_sig
chr12_49974230_C_T_b38	6	714	96	63820	5.58648	0.00101968	178	0.000137632	not_sig
chr19_4186398_T_G_b38	564	114	55864	7946	0.703705	0.00104601	179	0.000138406	not_sig
chr22_19137870_A_C_b38	500	220	40585	23271	1.30316	0.00105566	180	0.000139179	not_sig
chr2_74519195_A_T_b38	563	135	54457	9431	0.722235	0.00105884	181	0.000139952	not_sig
chr16_28605987_A_G_b38	439	213	38169	24305	1.31241	0.00106418	182	0.000140725	not_sig
chr2_97560842_C_G_b38	261	407	20606	41840	1.3021	0.00107705	183	0.000141498	not_sig
chr17_18150908_G_A_b38	712	4	63853	37	0.103143	0.00109413	184	0.000142272	not_sig
chr16_67290924_A_G_b38	628	76	59159	4723	0.659695	0.00110841	185	0.000143045	not_sig
chr19_16659950_C_CCTA_b38	705	13	63507	413	0.352675	0.00111252	186	0.000143818	not_sig
chr19_58118469_G_GCGGGGC_b38	618	82	53330	10316	1.45786	0.00111538	187	0.000144591	not_sig
chr17_40793987_C_T_b38	707	13	63475	413	0.353853	0.00114514	188	0.000145365	not_sig
chr5_177404825_C_G_b38	20	700	799	63095	2.25621	0.00116347	189	0.000146138	not_sig
chr2_74460423_T_C_b38	592	128	55209	8579	0.718685	0.0011796	190	0.000146911	not_sig
chr6_3118764_G_T_b38	702	14	63433	471	0.372319	0.00120732	191	0.000147684	not_sig
chr14_105469763_A_ACCTTGGCTGGTGGCC_b38	6	676	105	63731	5.38724	0.00120966	192	0.000148457	not_sig
chr17_8290155_G_A_b38	174	546	12277	51603	1.33949	0.00121052	193	0.000149231	not_sig
chr2_95100854_C_T_b38	663	11	61362	2490	2.4458	0.00121194	194	0.000150004	not_sig
chr1_111996439_A_G_b38	612	104	57126	6784	0.698828	0.00121292	195	0.000150777	not_sig
chr11_3088196_T_C_b38	106	612	12428	51436	0.716837	0.00123851	196	0.00015155	not_sig
chr20_63276630_C_T_b38	666	30	59196	4704	1.76412	0.00125866	197	0.000152324	not_sig
chr6_30744028_C_G_b38	41	679	5764	58144	0.609109	0.00128153	198	0.000153097	not_sig
chr19_1394467_G_GTGC_b38	688	32	61769	1515	0.527328	0.00129157	199	0.00015387	not_sig
chr11_3088178_C_T_b38	183	531	19867	43861	0.760857	0.00131211	200	0.000154643	not_sig
chr1_16201738_G_A_b38	494	218	47726	16138	0.766241	0.00133316	201	0.000155416	not_sig
chr16_1241074_T_C_b38	400	266	33110	28450	1.29212	0.00133781	202	0.00015619	not_sig
chr6_110476510_C_CCACCCCT_b38	47	639	6570	55830	0.625028	0.00134924	203	0.000156963	not_sig
chr19_47067086_G_A_b38	684	34	62236	1670	0.539824	0.00136078	204	0.000157736	not_sig
chr2_238353225_G_A_b38	458	224	46487	17385	0.764646	0.00136195	205	0.000158509	not_sig
chr7_100767944_C_T_b38	571	139	48068	15804	1.35062	0.00137866	206	0.000159282	not_sig
chr1_32780201_C_G_b38	603	99	57369	6539	0.69425	0.00138489	207	0.000160056	not_sig
chr1_45003504_A_T_b38	641	79	54205	9675	1.44825	0.00139361	208	0.000160829	not_sig
chr1_45010991_G_A_b38	573	141	47947	15897	1.34738	0.00145477	209	0.000161602	not_sig
chr1_1307327_A_G_b38	82	638	5107	58771	1.47908	0.00146624	210	0.000162375	not_sig
chr1_160750284_C_T_b38	652	66	55507	8385	1.49231	0.00147684	211	0.000163149	not_sig
chr2_74534295_T_C_b38	587	133	54841	9057	0.728896	0.00151462	212	0.000163922	not_sig
chr1_159204893_T_C_b38	677	9	63643	241	0.284848	0.00155346	213	0.000164695	not_sig
chr7_75423283_C_T_b38	341	323	36664	27056	0.779068	0.00157881	214	0.000165468	not_sig
chr15_90889477_G_T_b38	673	47	61308	2572	0.600719	0.00159325	215	0.000166241	not_sig
chr1_161218797_G_A_b38	667	15	60964	2926	2.1342	0.00161176	216	0.000167015	not_sig
chr2_131491799_C_T_b38	35	621	5543	58247	0.59225	0.00162841	217	0.000167788	not_sig
chr1_21855402_C_T_b38	695	23	60174	3734	1.87509	0.00167818	218	0.000168561	not_sig
chr3_51948235_A_G_b38	669	21	62991	905	0.457696	0.00169486	219	0.000169334	not_sig
chr15_43340351_T_C_b38	419	241	44198	19650	0.77296	0.00170862	220	0.000170107	not_sig
chr12_52316197_C_A_b38	462	192	48424	15256	0.75809	0.0017289	221	0.000170881	not_sig
chr9_122375240_A_C_b38	676	4	63837	45	0.119132	0.00177531	222	0.000171654	not_sig
chr5_173235021_T_C_b38	445	239	45100	18742	0.773751	0.00177707	223	0.000172427	not_sig
chr17_8143454_C_G_b38	95	625	6113	57743	1.43578	0.00177818	224	0.0001732	not_sig
chr15_68317309_G_T_b38	627	33	62118	1774	0.542612	0.00178876	225	0.000173974	not_sig
chr12_57476865_A_G_b38	37	681	1894	61954	1.77723	0.00181835	226	0.000174747	not_sig
chr22_41926850_G_T_b38	637	31	62172	1622	0.536085	0.00183909	227	0.00017552	not_sig
chr14_24266418_A_G_b38	516	204	49016	14862	0.766936	0.00189411	228	0.000176293	not_sig
chr3_47502513_C_A_b38	379	311	38730	24984	0.786128	0.00194437	229	0.000177066	not_sig
chr19_54217286_GA_G_b38	661	41	54102	1974	0.588236	0.00196584	230	0.00017784	not_sig
chr11_45924286_C_T_b38	702	18	63185	715	0.441323	0.00200019	231	0.000178613	not_sig
chr11_62792029_C_T_b38	579	83	58196	5696	0.682775	0.00200114	232	0.000179386	not_sig
chr10_100267650_C_T_b38	347	331	36474	27392	0.787303	0.00205072	233	0.000180159	not_sig
chr16_79655_C_T_b38	669	17	63215	679	0.422695	0.00205422	234	0.000180932	not_sig
chr7_144363193_A_G_b38	603	97	52024	5898	0.704769	0.00207164	235	0.000181706	not_sig
chr1_156723343_C_T_b38	697	23	60238	3678	1.85032	0.00209119	236	0.000182479	not_sig
chr11_65132799_G_T_b38	569	151	53295	10575	0.747703	0.00209515	237	0.000183252	not_sig
chrX_102749389_A_G_b38	715	5	49262	1139	3.30634	0.002106	238	0.000184025	not_sig
chr2_74414497_G_C_b38	598	122	55607	8285	0.730305	0.00216377	239	0.000184799	not_sig
chr1_155033615_A_G_b38	428	292	41432	22330	0.789976	0.00218071	240	0.000185572	not_sig
chr14_64801792_C_T_b38	661	17	63223	697	0.428657	0.00222455	241	0.000186345	not_sig
chr22_25326283_C_CAG_b38	249	413	20374	43350	1.28281	0.00222802	242	0.000187118	not_sig
chr6_136600981_A_G_b38	678	18	63148	750	0.447362	0.00223686	243	0.000187891	not_sig
chr16_88857069_T_C_b38	711	7	62041	1715	2.80774	0.00227069	244	0.000188665	not_sig
chr11_128902719_G_A_b38	656	4	63850	50	0.128426	0.00228385	245	0.000189438	not_sig
chr1_155192003_C_T_b38	688	32	45417	3585	1.69711	0.00231744	246	0.000190211	not_sig
chr2_162198214_C_T_b38	700	20	63084	826	0.458278	0.00232234	247	0.000190984	not_sig
chr6_31029915_G_C_b38	175	545	18747	44903	0.769104	0.0023227	248	0.000191758	not_sig
chr11_308426_G_C_b38	305	413	30755	33009	0.792623	0.00232941	249	0.000192531	not_sig
chr2_27581565_T_C_b38	343	377	22802	31556	1.2591	0.00234586	250	0.000193304	not_sig
chr2_178718671_T_C_b38	576	144	53841	10017	0.744191	0.00234756	251	0.000194077	not_sig
chr1_21856983_A_G_b38	688	24	60082	3812	1.8188	0.00235366	252	0.00019485	not_sig
chr3_14132646_T_C_b38	374	320	38072	25766	0.790975	0.00240039	253	0.000195624	not_sig
chrX_110175937_G_A_b38	466	254	35031	15000	0.785581	0.00243356	254	0.000196397	not_sig
chr6_143189720_T_G_b38	662	38	61846	2058	0.579706	0.00244028	255	0.00019717	not_sig
chr8_144358462_C_T_b38	644	4	63838	52	0.131144	0.00244673	256	0.000197943	not_sig
chr17_76688516_C_T_b38	162	558	11521	52363	1.31952	0.00251047	257	0.000198716	not_sig
chr6_30689238_T_C_b38	40	654	5713	58165	0.622701	0.00251316	258	0.00019949	not_sig
chr19_40577538_C_T_b38	539	181	44482	19346	1.29514	0.00251652	259	0.000200263	not_sig
chr11_65170212_C_T_b38	557	163	52290	11594	0.757674	0.00256183	260	0.000201036	not_sig
chr1_161166434_C_A_b38	486	234	39633	24243	1.27043	0.00257674	261	0.000201809	not_sig
chr17_81715620_G_A_b38	594	126	55204	8634	0.737322	0.00258668	262	0.000202583	not_sig
chr15_101295101_G_C_b38	706	12	63502	402	0.372445	0.00259488	263	0.000203356	not_sig
chr16_21971873_A_G_b38	714	4	62646	1270	3.61867	0.00270004	264	0.000204129	not_sig
chr1_159856126_C_T_b38	362	302	38489	25353	0.789577	0.00277877	265	0.000204902	not_sig
chr2_172428000_T_C_b38	479	197	48110	15242	0.770328	0.00281634	266	0.000205675	not_sig
chr14_24330372_C_G_b38	420	228	44892	18976	0.778664	0.0028637	267	0.000206449	not_sig
chr12_57154683_C_T_b38	643	23	62766	1130	0.503312	0.00287311	268	0.000207222	not_sig
chr1_45012761_C_T_b38	549	137	47972	15896	1.32786	0.00288299	269	0.000207995	not_sig
chrX_154489674_T_C_b38	713	5	50235	64	0.181674	0.00291487	270	0.000208768	not_sig
chr17_78500279_C_G_b38	425	295	41134	22716	0.795606	0.00292648	271	0.000209541	not_sig
chr10_73650294_G_A_b38	280	406	22532	41342	1.26539	0.00293979	272	0.000210315	not_sig
chr8_144452590_C_T_b38	8	712	206	63710	3.47496	0.0029464	273	0.000211088	not_sig
chr15_78131254_A_C_b38	459	209	46980	16592	0.775626	0.00299315	274	0.000211861	not_sig
chr22_21630090_G_A_b38	498	166	50917	12913	0.760826	0.00304421	275	0.000212634	not_sig
chr2_74455385_C_T_b38	590	130	54881	8997	0.74402	0.00305405	276	0.000213408	not_sig
chr1_157700496_C_T_b38	714	4	63848	50	0.139785	0.00307972	277	0.000214181	not_sig
chr9_123792565_A_G_b38	704	16	61110	2788	2.0074	0.00312488	278	0.000214954	not_sig
chr6_31954477_A_C_b38	169	551	18178	45686	0.770854	0.00314217	279	0.000215727	not_sig
chr10_133423692_C_T_b38	216	498	21473	38909	0.785926	0.00315292	280	0.0002165	not_sig
chr12_88107070_T_C_b38	606	44	61186	2704	0.60866	0.00316301	281	0.000217274	not_sig
chr11_64341067_C_T_b38	519	201	42700	21102	1.27605	0.00318146	282	0.000218047	not_sig
chr20_38346542_C_T_b38	670	38	58532	5360	1.61459	0.00321508	283	0.00021882	not_sig
chr6_32829584_C_T_b38	483	217	47254	16610	0.782381	0.00322428	284	0.000219593	not_sig
chr7_100753140_T_G_b38	565	141	48051	15813	1.31869	0.00325117	285	0.000220367	not_sig
chr16_67282331_C_T_b38	645	75	59160	4720	0.686139	0.00327443	286	0.00022114	not_sig
chr6_73394922_G_A_b38	714	2	63902	6	0.0335201	0.00328379	287	0.000221913	not_sig
chrX_103500623_T_A_b38	550	158	35899	13441	1.30333	0.00329754	288	0.000222686	not_sig
chr3_48566334_A_G_b38	717	3	63872	24	0.0898046	0.00330187	289	0.000223459	not_sig
chr10_49610828_C_A_b38	718	2	63906	6	0.0337058	0.00331898	290	0.000224233	not_sig
chr8_144358290_C_G_b38	714	4	63683	51	0.14295	0.00332233	291	0.000225006	not_sig
chr17_75522122_G_C_b38	256	464	19398	44460	1.26455	0.00333207	292	0.000225779	not_sig
chr19_57231104_G_C_b38	151	509	11691	52143	1.32313	0.00333812	293	0.000226552	not_sig
chr2_239959194_A_AT_b38	582	138	54251	9635	0.74901	0.00334322	294	0.000227325	not_sig
chr2_239960810_G_A_b38	582	138	54263	9641	0.749311	0.00334857	295	0.000228099	not_sig
chr3_186790133_C_T_b38	500	210	48046	15792	0.782583	0.0034012	296	0.000228872	not_sig
chr14_104883549_C_T_b38	212	498	22393	41315	0.78542	0.00340592	297	0.000229645	not_sig
chr1_201891888_C_G_b38	386	266	41359	22449	0.787649	0.0034088	298	0.000230418	not_sig
chr20_63248922_A_G_b38	195	455	22664	41176	0.778629	0.00341504	299	0.000231192	not_sig
chr7_102496096_T_G_b38	651	63	52010	7336	1.45751	0.0034383	300	0.000231965	not_sig
chr11_44074688_G_A_b38	172	524	18874	44516	0.774193	0.0034872	301	0.000232738	not_sig
chr21_41742040_T_C_b38	304	364	32703	31167	0.795939	0.00351006	302	0.000233511	not_sig
chr19_54221658_C_CT_b38	649	69	53564	3876	0.680623	0.00353721	303	0.000234284	not_sig
chr7_103103446_C_T_b38	6	712	125	63797	4.30092	0.00356468	304	0.000235058	not_sig
chr16_89640584_C_T_b38	499	199	48745	15113	0.777442	0.0035958	305	0.000235831	not_sig
chr15_91006592_G_C_b38	636	76	59019	4881	0.692087	0.00362218	306	0.000236604	not_sig
chr11_709680_T_C_b38	276	384	30339	33491	0.793423	0.00371364	307	0.000237377	not_sig
chr1_161167053_C_G_b38	485	235	39662	24190	1.25874	0.00374371	308	0.00023815	not_sig
chr19_10579881_G_C_b38	52	662	3085	60805	1.54821	0.00377996	309	0.000238924	not_sig
chr3_113279418_A_G_b38	447	249	44320	19554	0.792034	0.00379251	310	0.000239697	not_sig
chr19_13938330_G_C_b38	563	153	52859	10949	0.762206	0.00383577	311	0.00024047	not_sig
chr22_19850052_C_T_b38	445	271	42970	20884	0.798066	0.00392649	312	0.000241243	not_sig
chr17_18798907_T_C_b38	177	541	18847	44859	0.778724	0.00394744	313	0.000242017	not_sig
chr2_240526793_C_T_b38	634	86	53799	10091	1.38277	0.00395061	314	0.00024279	not_sig
chr11_46889906_T_C_b38	210	510	15609	48265	1.27323	0.00399321	315	0.000243563	not_sig
chr15_82345265_C_T_b38	694	26	59132	1176	0.530849	0.00402617	316	0.000244336	not_sig
chr12_48819023_C_T_b38	519	157	51868	11970	0.762891	0.00404664	317	0.000245109	not_sig
chr13_29025586_A_G_b38	717	3	63876	26	0.0972822	0.00405631	318	0.000245883	not_sig
chr19_54250956_G_T_b38	580	94	41249	9155	1.36945	0.00407673	319	0.000246656	not_sig
chr1_1707555_C_T_b38	666	50	55410	2674	0.642802	0.00410121	320	0.000247429	not_sig
chr21_39191488_A_G_b38	601	97	57215	6647	0.719811	0.00411014	321	0.000248202	not_sig
chr10_133285117_G_A_b38	696	24	62768	1132	0.523005	0.00411568	322	0.000248975	not_sig
chr15_45163996_G_A_b38	7	689	178	63734	3.63773	0.00413149	323	0.000249749	not_sig
chr2_121285174_A_T_b38	385	293	39590	24060	0.798552	0.00414385	324	0.000250522	not_sig
chr1_44739926_T_C_b38	623	97	52715	11173	1.36129	0.00414452	325	0.000251295	not_sig
chr12_48825355_C_G_b38	524	152	52309	11539	0.760465	0.00416091	326	0.000252068	not_sig
chr3_39146691_C_T_b38	605	105	56666	7194	0.731499	0.00418414	327	0.000252842	not_sig
chr19_13877602_A_G_b38	531	189	50023	13881	0.779621	0.00418761	328	0.000253615	not_sig
chr9_137590065_C_T_b38	586	134	54125	9299	0.751331	0.00420058	329	0.000254388	not_sig
chr11_292798_A_G_b38	253	467	19267	44611	1.25439	0.00426506	330	0.000255161	not_sig
chr7_66086834_C_T_b38	605	43	61199	2695	0.619586	0.00426966	331	0.000255934	not_sig
chr19_1453161_G_A_b38	716	4	63839	55	0.154216	0.00428563	332	0.000256708	not_sig
chr2_74460131_A_ACACATTT_b38	582	120	55317	8477	0.743234	0.00433621	333	0.000257481	not_sig
chr19_2123929_C_T_b38	539	131	54024	9864	0.751249	0.00438602	334	0.000258254	not_sig
chr19_17847968_T_C_b38	645	75	59092	4796	0.69799	0.00447833	335	0.000259027	not_sig
chr5_141174900_G_T_b38	514	194	47259	13967	0.783033	0.00454602	336	0.000259801	not_sig
chrX_48577014_T_C_b38	514	204	33252	16705	1.26579	0.00462211	337	0.000260574	not_sig
chr11_64256499_G_A_b38	530	190	43889	19961	1.26867	0.00463363	338	0.000261347	not_sig
chr2_240014662_G_A_b38	540	128	54237	9649	0.750534	0.00472298	339	0.00026212	not_sig
chr1_151001835_G_A_b38	610	54	60396	3516	0.657623	0.00474832	340	0.000262893	not_sig
chr7_75985239_G_A_b38	588	88	57744	6152	0.711876	0.00477225	341	0.000263667	not_sig
chr2_130144621_C_T_b38	485	225	40266	23456	1.25567	0.00481258	342	0.00026444	not_sig
chr22_50229430_A_G_b38	713	3	63860	28	0.104207	0.00483692	343	0.000265213	not_sig
chr19_32826637_C_T_b38	612	108	51670	12180	1.33578	0.00483821	344	0.000265986	not_sig
chr15_69435468_A_AT_b38	697	3	63871	29	0.105489	0.00497367	345	0.000266759	not_sig
chr17_7857079_G_A_b38	615	105	56762	7132	0.735935	0.00514082	346	0.000267533	not_sig
chr12_6551059_T_C_b38	453	199	47489	16333	0.782921	0.00514343	347	0.000268306	not_sig
chr19_32692410_A_G_b38	630	90	53400	10400	1.3633	0.0051835	348	0.000269079	not_sig
chr19_58394796_T_C_b38	361	301	38236	25568	0.801983	0.00525009	349	0.000269852	not_sig
chr16_31077026_G_A_b38	414	306	39972	23892	0.808678	0.00530504	350	0.000270626	not_sig
chr11_298758_G_A_b38	499	181	49768	14104	0.781293	0.00530838	351	0.000271399	not_sig
chr19_16325451_T_C_b38	146	574	15779	47903	0.77219	0.0053873	352	0.000272172	not_sig
chr22_17683229_T_G_b38	560	110	50603	13263	1.33432	0.00540162	353	0.000272945	not_sig
chr16_70480925_A_C_b38	351	355	28379	35465	1.23561	0.00542301	354	0.000273718	not_sig
chr16_1534617_T_C_b38	388	282	40267	23427	0.800479	0.00543244	355	0.000274492	not_sig
chr16_2212112_G_C_b38	407	313	32769	31141	1.23572	0.00549703	356	0.000275265	not_sig
chr11_116779043_T_C_b38	641	23	62732	1186	0.526897	0.00550586	357	0.000276038	not_sig
chr12_113094812_A_G_b38	637	83	54176	9694	1.37327	0.00556467	358	0.000276811	not_sig
chr9_37302158_C_T_b38	432	250	37057	26793	1.24938	0.00557138	359	0.000277584	not_sig
chr1_35386920_G_T_b38	573	87	57624	6256	0.715037	0.00563718	360	0.000278358	not_sig
chr21_46413041_C_T_b38	605	65	53699	3959	0.686217	0.00566629	361	0.000279131	not_sig
chr7_150803432_C_T_b38	533	187	44224	19630	1.26517	0.0056945	362	0.000279904	not_sig
chr2_241108335_A_G_b38	535	133	53717	10151	0.76015	0.0057021	363	0.000280677	not_sig
chrX_48898097_G_A_b38	641	65	46796	3262	0.687416	0.00574353	364	0.000281451	not_sig
chr17_38466241_C_G_b38	214	506	22075	41675	0.798432	0.00579151	365	0.000282224	not_sig
chr16_66552856_G_A_b38	631	31	62140	1766	0.578478	0.00579342	366	0.000282997	not_sig
chr19_13926955_C_T_b38	564	156	52625	11237	0.771992	0.0058303	367	0.00028377	not_sig
chr6_36919532_G_A_b38	527	191	49677	14195	0.788419	0.00590327	368	0.000284543	not_sig
chr19_1051138_CTG_C_b38	657	57	56729	7167	1.45621	0.00590493	369	0.000285317	not_sig
chr14_23995101_C_A_b38	670	14	59133	2503	2.02571	0.00593147	370	0.00028609	not_sig
chr11_44083151_C_CCT_b38	180	540	18934	44864	0.789831	0.00594435	371	0.000286863	not_sig
chr11_117390772_C_G_b38	576	144	53554	10296	0.769018	0.00595073	372	0.000287636	not_sig
chr2_240524036_C_A_b38	630	90	53486	10406	1.36189	0.0060011	373	0.000288409	not_sig
chr3_49684923_G_A_b38	537	173	45304	18554	1.27124	0.0060254	374	0.000289183	not_sig
chr6_26285455_T_C_b38	276	432	28195	35679	0.808474	0.00611499	375	0.000289956	not_sig
chr16_1558176_A_G_b38	453	209	46785	17061	0.790405	0.006177	376	0.000290729	not_sig
chrX_153957384_G_C_b38	587	129	42930	7175	0.760518	0.00618082	377	0.000291502	not_sig
chr18_31132723_A_G_b38	563	101	56456	7448	0.735388	0.00619293	378	0.000292276	not_sig
chr1_35902179_A_G_b38	596	124	55174	8668	0.755108	0.00620222	379	0.000293049	not_sig
chr7_100615131_C_T_b38	592	114	50930	12934	1.31879	0.00624268	380	0.000293822	not_sig
chr10_91828451_G_A_b38	249	435	26497	37231	0.8043	0.00630464	381	0.000294595	not_sig
chr22_23580365_G_A_b38	571	81	58013	5861	0.712193	0.00631987	382	0.000295368	not_sig
chr1_161595591_A_G_b38	607	63	53424	7926	1.42944	0.00632569	383	0.000296142	not_sig
chr5_53109547_C_CCGGGGG_b38	476	232	37668	22838	1.24395	0.00632634	384	0.000296915	not_sig
chr12_55637827_A_G_b38	548	102	56165	7711	0.737608	0.00644608	385	0.000297688	not_sig
chr6_151305899_A_G_b38	355	343	35780	28076	0.812137	0.0064784	386	0.000298461	not_sig
chr16_89694304_G_A_b38	380	290	39508	24322	0.806677	0.00653788	387	0.000299235	not_sig
chr11_62602409_G_A_b38	488	220	40748	22920	1.24769	0.00655659	388	0.000300008	not_sig
chr22_21964166_C_T_b38	657	63	56204	7672	1.42353	0.00657725	389	0.000300781	not_sig
chr11_74085872_C_T_b38	453	249	44289	19581	0.804337	0.00660419	390	0.000301554	not_sig
chr16_1379650_C_T_b38	664	56	56813	6935	1.44737	0.00661144	391	0.000302327	not_sig
chr19_4177054_A_G_b38	106	610	7303	56419	1.34246	0.00666579	392	0.000303101	not_sig
chr1_19311815_A_G_b38	216	504	16258	47586	1.2544	0.00671286	393	0.000303874	not_sig
chr10_99832187_T_C_b38	234	456	24890	38978	0.803611	0.00673524	394	0.000304647	not_sig
chr12_120151048_A_G_b38	140	554	15701	48173	0.775344	0.00679388	395	0.00030542	not_sig
chr19_2389795_A_G_b38	715	5	63813	101	0.226333	0.00681412	396	0.000306193	not_sig
chr8_144499067_G_A_b38	657	3	63873	35	0.120004	0.00687579	397	0.000306967	not_sig
chr22_50314340_C_T_b38	691	29	62391	1525	0.582409	0.00691607	398	0.00030774	not_sig
chr19_40611963_A_G_b38	456	264	37210	26588	1.2342	0.00691928	399	0.000308513	not_sig
chr1_184070601_T_A_b38	562	86	57412	6362	0.724151	0.00692577	400	0.000309286	not_sig
chr19_48933669_A_C_b38	656	18	63036	864	0.499524	0.00693061	401	0.00031006	not_sig
chr17_8253992_C_T_b38	169	549	12429	51439	1.274	0.00693258	402	0.000310833	not_sig
chr1_944858_A_G_b38	52	610	3415	60485	1.50984	0.0069532	403	0.000311606	not_sig
chr4_186191887_C_G_b38	383	319	31531	32281	1.22919	0.0070188	404	0.000312379	not_sig
chr2_86211023_A_G_b38	280	438	21784	42086	1.23505	0.00708664	405	0.000313152	not_sig
chr22_37018427_T_G_b38	716	4	63816	64	0.179516	0.00709606	406	0.000313926	not_sig
chr1_1522875_T_G_b38	660	8	63583	259	0.336057	0.00710592	407	0.000314699	not_sig
chr2_10768767_A_G_b38	407	289	40530	23342	0.811069	0.0071298	408	0.000315472	not_sig
chr19_4186218_A_C_b38	599	113	55942	7912	0.749716	0.0071477	409	0.000316245	not_sig
chr1_152565882_G_C_b38	526	194	49421	14435	0.791935	0.007166	410	0.000317018	not_sig
chr2_74498051_G_A_b38	592	118	55554	8358	0.754791	0.0071907	411	0.000317792	not_sig
chr11_35208126_T_C_b38	108	608	12126	51768	0.75834	0.00722316	412	0.000318565	not_sig
chr12_32679935_G_C_b38	590	128	54779	9085	0.764457	0.00725677	413	0.000319338	not_sig
chr1_44775613_C_G_b38	622	74	54834	9056	1.38818	0.00725727	414	0.000320111	not_sig
chr11_113695485_C_A_b38	418	234	44138	19740	0.798905	0.00726154	415	0.000320885	not_sig
chr4_48035909_A_G_b38	533	187	50003	13879	0.79113	0.00732359	416	0.000321658	not_sig
chr22_19122096_A_C_b38	480	234	39540	23890	1.23938	0.00732482	417	0.000322431	not_sig
chr2_74529049_G_C_b38	547	125	54477	9437	0.75805	0.00736224	418	0.000323204	not_sig
chr2_113641568_G_A_b38	407	281	40962	22874	0.808815	0.00738217	419	0.000323977	not_sig
chr11_62598193_G_A_b38	210	450	23544	40296	0.798709	0.00739432	420	0.000324751	not_sig
chr22_19122251_A_G_b38	411	239	36961	26787	1.2463	0.00740304	421	0.000325524	not_sig
chr5_141194530_T_G_b38	641	59	45368	5996	1.43588	0.00743722	422	0.000326297	not_sig
chr14_23527563_A_G_b38	563	153	52709	11129	0.776942	0.00745832	423	0.00032707	not_sig
chr1_1482624_T_C_b38	598	76	58509	5275	0.709394	0.0074675	424	0.000327844	not_sig
chr21_33266554_G_A_b38	236	474	18240	45606	1.24489	0.00748907	425	0.000328617	not_sig
chr19_55198653_A_G_b38	688	32	62163	1723	0.595925	0.0074964	426	0.00032939	not_sig
chr19_2118693_C_T_b38	543	131	53945	9935	0.763388	0.00752105	427	0.000330163	not_sig
chr16_84368669_G_C_b38	466	202	47454	16360	0.795326	0.00754346	428	0.000330936	not_sig
chr14_77462182_A_G_b38	260	452	20291	43577	1.23535	0.00755626	429	0.00033171	not_sig
chr12_49964761_T_C_b38	10	710	349	63561	2.56512	0.00758173	430	0.000332483	not_sig
chr19_5776360_C_T_b38	635	15	63201	703	0.470884	0.00759354	431	0.000333256	not_sig
chr12_6917768_T_C_b38	503	153	45893	17867	1.27992	0.00760972	432	0.000334029	not_sig
chr10_133272758_C_G_b38	696	24	62662	1182	0.54703	0.00765586	433	0.000334802	not_sig
chr8_23163833_G_A_b38	609	105	56557	7289	0.747497	0.00774005	434	0.000335576	not_sig
chr1_1454315_C_T_b38	555	161	51985	11801	0.782542	0.00776406	435	0.000336349	not_sig
chr3_15038076_G_A_b38	709	3	63866	34	0.125816	0.00783781	436	0.000337122	not_sig
chr8_10428300_T_C_b38	681	39	61630	2230	0.631823	0.00791661	437	0.000337895	not_sig
chr14_20989786_C_T_b38	468	190	39692	20270	1.25789	0.00794088	438	0.000338669	not_sig
chr12_6551053_C_T_b38	460	198	47532	16266	0.795037	0.00800508	439	0.000339442	not_sig
chr10_121974495_CGCTGCA_C_b38	492	228	40485	23253	1.23941	0.00805153	440	0.000340215	not_sig
chr8_17217131_C_G_b38	521	193	49271	14501	0.794487	0.00805778	441	0.000340988	not_sig
chr12_49042031_C_T_b38	717	3	63832	34	0.127303	0.00808893	442	0.000341761	not_sig
chr22_29310570_C_T_b38	697	13	61606	2302	2.00342	0.00811089	443	0.000342535	not_sig
chr11_1243512_G_C_b38	380	302	29455	19011	0.812124	0.00812697	444	0.000343308	not_sig
chr18_45953254_C_A_b38	619	63	59685	4197	0.690914	0.00812906	445	0.000344081	not_sig
chr16_71568762_C_T_b38	701	3	63871	35	0.128045	0.00818614	446	0.000344854	not_sig
chr9_92714159_C_G_b38	526	194	49384	14492	0.795657	0.00827261	447	0.000345627	not_sig
chr1_149055986_G_C_b38	341	355	33543	28487	0.815776	0.00828019	448	0.000346401	not_sig
chr16_1964423_C_G_b38	363	355	29098	34762	1.22157	0.00831836	449	0.000347174	not_sig
chr1_155177242_G_A_b38	405	281	40836	23014	0.812265	0.00832087	450	0.000347947	not_sig
chr16_53423_C_A_b38	164	556	12011	51847	1.27325	0.0083357	451	0.00034872	not_sig
chr10_73249349_T_A_b38	609	57	60067	3823	0.680003	0.00844834	452	0.000349494	not_sig
chr19_10259814_T_A_b38	563	123	54705	9119	0.762998	0.0084543	453	0.000350267	not_sig
chr19_7870169_C_G_b38	648	62	42511	5765	1.41736	0.00846564	454	0.00035104	not_sig
chr16_2088268_T_C_b38	598	122	41938	11114	1.29898	0.00846633	455	0.000351813	not_sig
chr16_57051553_C_T_b38	693	11	63495	421	0.417718	0.00849993	456	0.000352586	not_sig
chr22_29268434_G_A_b38	434	264	42740	21118	0.812277	0.00857094	457	0.00035336	not_sig
chr16_2207104_C_G_b38	393	327	31699	32163	1.21943	0.00867481	458	0.000354133	not_sig
chr1_1287315_G_C_b38	679	37	61766	2116	0.628687	0.00867917	459	0.000354906	not_sig
chr22_41574905_T_C_b38	639	13	63337	553	0.429166	0.00869655	460	0.000355679	not_sig
chr2_10782390_A_C_b38	328	374	33054	30810	0.817466	0.0087471	461	0.000356452	not_sig
chr2_112542706_C_G_b38	644	74	59051	4855	0.715511	0.0087478	462	0.000357226	not_sig
chr6_31667933_T_C_b38	498	150	51774	12114	0.776808	0.00878557	463	0.000357999	not_sig
chr20_33562652_T_C_b38	683	3	63881	37	0.131865	0.0087978	464	0.000358772	not_sig
chr16_70136319_G_T_b38	573	119	52318	8270	0.761136	0.00884601	465	0.000359545	not_sig
chr20_38326388_G_A_b38	667	3	63844	38	0.132333	0.00885458	466	0.000360319	not_sig
chr6_31878964_C_A_b38	606	64	59521	4379	0.696622	0.00885527	467	0.000361092	not_sig
chr20_3750257_G_C_b38	662	2	63856	12	0.0622025	0.00886304	468	0.000361865	not_sig
chr5_179802348_G_A_b38	718	2	63901	11	0.0617987	0.00891085	469	0.000362638	not_sig
chr15_41766702_A_G_b38	718	2	63885	11	0.0618142	0.00891509	470	0.000363411	not_sig
chr17_63949388_C_T_b38	718	2	63881	11	0.0618181	0.00891615	471	0.000364185	not_sig
chr12_49269803_C_CCTCCTCCCCCTG_b38	719	1	62834	684	7.82691	0.00894614	472	0.000364958	not_sig
chr1_962358_C_T_b38	656	64	59829	4069	0.697108	0.00895902	473	0.000365731	not_sig
chr3_9843931_G_C_b38	618	64	59602	4310	0.698272	0.00897266	474	0.000366504	not_sig
chr5_7883075_G_A_b38	577	119	55215	8689	0.76303	0.00898316	475	0.000367278	not_sig
chr19_12186004_G_A_b38	592	104	56431	7461	0.752606	0.00909842	476	0.000368051	not_sig
chr11_66026471_A_G_b38	462	224	45937	17929	0.804984	0.00915792	477	0.000368824	not_sig
chr2_11580860_G_A_b38	567	115	55385	8525	0.758905	0.00917359	478	0.000369597	not_sig
chr19_581633_G_A_b38	603	87	57773	6113	0.733377	0.00921806	479	0.00037037	not_sig
chr6_32828908_A_G_b38	500	220	47107	16701	0.805757	0.00929129	480	0.000371144	not_sig
chr17_8048501_A_G_b38	323	389	32103	31741	0.820971	0.0092954	481	0.000371917	not_sig
chr7_90304560_C_G_b38	356	364	28462	35374	1.21553	0.00929585	482	0.00037269	not_sig
chr1_161198214_C_T_b38	541	177	50693	13141	0.792327	0.00932668	483	0.000373463	not_sig
chr6_3076907_T_C_b38	40	676	2338	61468	1.55567	0.00933981	484	0.000374236	not_sig
chr1_26921784_C_T_b38	712	6	62531	1381	2.62076	0.00935903	485	0.00037501	not_sig
chr2_86211477_T_C_b38	416	304	39941	23923	0.819627	0.00947127	486	0.000375783	not_sig
chr15_85744679_C_T_b38	437	241	44173	19697	0.808551	0.00953036	487	0.000376556	not_sig
chrX_48832339_C_T_b38	568	84	45404	4903	0.730192	0.00954621	488	0.000377329	not_sig
chr1_944307_T_C_b38	55	665	3415	60501	1.46525	0.00966301	489	0.000378103	not_sig
chr3_47498212_T_C_b38	588	132	54445	9447	0.772928	0.00966312	490	0.000378876	not_sig
chr12_52291312_C_G_b38	535	183	44380	18970	1.24963	0.00975375	491	0.000379649	not_sig
chr17_41462863_G_A_b38	478	242	39339	24429	1.22658	0.00977267	492	0.000380422	not_sig
chr11_47165516_G_A_b38	531	121	48863	14409	1.29409	0.00978002	493	0.000381195	not_sig
chr19_2121317_C_T_b38	555	133	53873	10009	0.775284	0.00983291	494	0.000381969	not_sig
chr7_100762174_G_T_b38	524	196	43563	20211	1.24035	0.00991055	495	0.000382742	not_sig
chr17_80047238_A_G_b38	569	139	48688	15196	1.27763	0.00993307	496	0.000383515	not_sig
chr6_30987582_G_A_b38	649	65	59686	4218	0.705611	0.00994943	497	0.000384288	not_sig
chr11_77183190_G_C_b38	277	413	28785	35113	0.818147	0.0099548	498	0.000385061	not_sig
chr8_38238144_C_T_b38	581	139	48972	14924	1.27379	0.0101132	499	0.000385835	not_sig
chr14_105487137_G_T_b38	5	701	114	63752	3.98879	0.0101422	500	0.000386608	not_sig
chr4_2904980_G_T_b38	547	167	51456	12420	0.790599	0.0102191	501	0.000387381	not_sig
chr16_89712731_AGCT_A_b38	603	85	57902	5990	0.733891	0.0102801	502	0.000388154	not_sig
chr16_31094233_A_C_b38	502	218	47159	16573	0.809252	0.0103835	503	0.000388928	not_sig
chr9_83248176_A_G_b38	461	259	37862	26014	1.22294	0.0105422	504	0.000389701	not_sig
chr2_86213313_T_C_b38	418	302	40057	23811	0.822751	0.0105537	505	0.000390474	not_sig
chr11_308363_G_C_b38	306	414	30163	33555	0.82225	0.0106537	506	0.000391247	not_sig
chr19_51367517_C_A_b38	717	3	63850	38	0.14224	0.01073	507	0.00039202	not_sig
chr1_247434327_C_T_b38	603	113	55292	7928	0.765139	0.010735	508	0.000392794	not_sig
chr14_77176304_T_C_b38	652	8	63635	283	0.36245	0.0107429	509	0.000393567	not_sig
chr1_1182832_T_C_b38	509	211	47726	15984	0.807915	0.0107597	510	0.00039434	not_sig
chr1_1219858_G_A_b38	596	124	55060	8844	0.772035	0.0107656	511	0.000395113	not_sig
chr1_27357905_G_A_b38	544	176	50760	13114	0.798546	0.0107747	512	0.000395886	not_sig
chr19_9835466_C_T_b38	656	10	63489	399	0.412267	0.0107862	513	0.00039666	not_sig
chr21_42434957_A_C_b38	521	167	45584	18304	1.25272	0.0109352	514	0.000397433	not_sig
chr6_30953180_G_A_b38	532	138	53140	10750	0.779865	0.0109936	515	0.000398206	not_sig
chr1_944296_G_A_b38	56	664	3529	60385	1.4431	0.0110188	516	0.000398979	not_sig
chr1_15729237_C_T_b38	479	175	49480	14384	0.795697	0.0110921	517	0.000399753	not_sig
chr14_24316578_C_T_b38	608	100	56833	7015	0.750465	0.0110973	518	0.000400526	not_sig
chr1_227748061_G_A_b38	659	47	60982	2916	0.670461	0.0110991	519	0.000401299	not_sig
chr6_32045040_C_T_b38	646	74	56972	4722	0.723545	0.0111243	520	0.000402072	not_sig
chr19_54200852_C_G_b38	185	533	19235	44629	0.805322	0.0111521	521	0.000402845	not_sig
chr17_74248902_C_T_b38	676	44	61244	2646	0.663774	0.0112034	522	0.000403619	not_sig
chr1_173487878_C_T_b38	483	191	48512	15376	0.801508	0.0112049	523	0.000404392	not_sig
chr14_24368462_G_C_b38	535	145	52489	11151	0.783847	0.0112289	524	0.000405165	not_sig
chr17_7343621_T_G_b38	293	427	23062	40808	1.21419	0.0112469	525	0.000405938	not_sig
chr19_43575535_G_A_b38	248	414	27036	36766	0.81462	0.0113531	526	0.000406712	not_sig
chr19_37470246_G_GGT_b38	654	8	62154	1752	2.30437	0.0113919	527	0.000407485	not_sig
chr15_40340937_A_T_b38	607	71	58790	4938	0.718088	0.0114097	528	0.000408258	not_sig
chr21_46001401_C_T_b38	340	372	33555	30307	0.825509	0.0114402	529	0.000409031	not_sig
chr11_4915171_G_A_b38	717	3	63861	39	0.145958	0.0114555	530	0.000409804	not_sig
chr17_76292181_T_C_b38	504	216	34740	18308	1.22967	0.0114804	531	0.000410578	not_sig
chr20_38241720_T_G_b38	456	264	43305	20569	0.82042	0.011536	532	0.000411351	not_sig
chr20_62828986_C_T_b38	360	342	35796	28046	0.824732	0.0116078	533	0.000412124	not_sig
chr11_110093461_G_A_b38	478	230	45374	17784	0.814559	0.0117384	534	0.000412897	not_sig
chr15_89592201_A_G_b38	79	635	5331	58583	1.36715	0.0117463	535	0.00041367	not_sig
chr9_95111153_G_A_b38	393	327	37880	25998	0.82485	0.0117845	536	0.000414444	not_sig
chrX_154467904_C_G_b38	122	596	6808	43078	1.29524	0.0117986	537	0.000415217	not_sig
chr1_156583189_G_A_b38	718	2	63879	13	0.07306	0.0118272	538	0.00041599	not_sig
chr2_178802363_C_T_b38	287	415	29191	34687	0.821772	0.0118767	539	0.000416763	not_sig
chr1_164560047_GTTTT_G_b38	541	135	53484	10390	0.778494	0.0118832	540	0.000417537	not_sig
chr2_112913833_A_G_b38	181	533	18936	44906	0.805318	0.0119003	541	0.00041831	not_sig
chr15_41736156_C_A_b38	272	394	23060	40814	1.22186	0.0119477	542	0.000419083	not_sig
chr17_74541739_G_A_b38	626	92	57530	6326	0.748206	0.0119764	543	0.000419856	not_sig
chr16_2206046_AC_A_b38	392	328	31750	32086	1.20777	0.012044	544	0.000420629	not_sig
chr3_47418189_C_T_b38	335	385	26670	37086	1.20996	0.0121357	545	0.000421403	not_sig
chr19_57908473_G_T_b38	470	246	38959	24899	1.22106	0.0121972	546	0.000422176	not_sig
chr22_39570772_C_T_b38	717	3	63872	40	0.149674	0.0122084	547	0.000422949	not_sig
chr10_87008666_A_G_b38	449	271	36830	27026	1.21579	0.012241	548	0.000423722	not_sig
chr1_228280865_A_G_b38	401	287	40191	23603	0.820542	0.0123556	549	0.000424495	not_sig
chr2_130339674_G_A_b38	544	176	50672	13142	0.80164	0.0123717	550	0.000425269	not_sig
chr11_47275150_G_A_b38	646	2	63905	15	0.0758157	0.0123779	551	0.000426042	not_sig
chr19_1047162_A_G_b38	248	470	24975	38857	0.820952	0.0123978	552	0.000426815	not_sig
chr3_28241610_G_A_b38	716	4	62839	1081	3.07928	0.0124494	553	0.000427588	not_sig
chr8_144399893_C_T_b38	314	406	23350	36536	1.21015	0.0124627	554	0.000428362	not_sig
chr7_100813035_A_G_b38	252	466	25346	38530	0.822061	0.0126218	555	0.000429135	not_sig
chr13_31329697_G_T_b38	155	565	16353	47507	0.796973	0.0126521	556	0.000429908	not_sig
chr3_134486603_ACCTT_A_b38	194	496	20804	42962	0.807714	0.0126761	557	0.000430681	not_sig
chr3_69077982_T_C_b38	507	173	50229	13663	0.797174	0.0126809	558	0.000431454	not_sig
chr1_1179833_G_T_b38	617	103	56618	7182	0.759869	0.0127357	559	0.000432228	not_sig
chr19_46309112_AG_A_b38	684	20	62891	985	0.535641	0.0127703	560	0.000433001	not_sig
chr7_42911916_G_A_b38	186	534	13989	49829	1.2407	0.0127719	561	0.000433774	not_sig
chr6_160752914_T_G_b38	296	420	29384	34450	0.826268	0.0127937	562	0.000434547	not_sig
chr12_52519175_G_A_b38	577	119	55082	8796	0.774291	0.0128955	563	0.00043532	not_sig
chr1_961945_G_C_b38	65	655	4236	59668	1.39784	0.0129316	564	0.000436094	not_sig
chr19_4332108_A_T_b38	425	249	43148	20652	0.816942	0.0130123	565	0.000436867	not_sig
chr14_54902703_G_A_b38	717	3	63833	41	0.15351	0.0130155	566	0.00043764	not_sig
chr17_80138078_T_C_b38	395	299	33320	30532	1.21053	0.0130262	567	0.000438413	not_sig
chr6_95586736_G_A_b38	655	65	56177	7701	1.38139	0.0130575	568	0.000439187	not_sig
chr5_128966131_T_A_b38	483	237	39961	23899	1.21883	0.0131415	569	0.00043996	not_sig
chr16_1518401_A_G_b38	519	153	51803	12075	0.790693	0.0132504	570	0.000440733	not_sig
chr6_39934461_C_T_b38	646	18	62958	926	0.527862	0.0132647	571	0.000441506	not_sig
chr19_13918456_A_C_b38	537	173	50725	13115	0.802554	0.0133686	572	0.000442279	not_sig
chr5_142771377_T_C_b38	628	86	57936	5890	0.742383	0.0134044	573	0.000443053	not_sig
chr6_159685056_C_A_b38	382	318	31793	32041	1.21063	0.0134478	574	0.000443826	not_sig
chr18_79400235_A_C_b38	386	314	31397	30859	1.20823	0.0134712	575	0.000444599	not_sig
chr17_7350996_G_A_b38	582	70	58782	5104	0.721924	0.013478	576	0.000445372	not_sig
chr17_69129699_C_T_b38	227	447	18668	45188	1.22926	0.0135237	577	0.000446146	not_sig
chr7_91264787_C_G_b38	304	354	26387	37369	1.21616	0.0136223	578	0.000446919	not_sig
chr19_4328863_T_C_b38	309	395	31026	32802	0.827058	0.0136788	579	0.000447692	not_sig
chr13_98453141_G_A_b38	535	183	44868	18944	1.23435	0.0136872	580	0.000448465	not_sig
chr20_63743036_C_T_b38	580	116	55205	8525	0.772122	0.0137458	581	0.000449238	not_sig
chr12_120153447_C_T_b38	136	580	14627	49263	0.789726	0.0137534	582	0.000450012	not_sig
chr11_2160774_A_G_b38	3	717	42	63864	6.36222	0.0138137	583	0.000450785	not_sig
chr17_7576574_C_T_b38	680	22	62781	1139	0.560766	0.0138284	584	0.000451558	not_sig
chr6_2959279_C_T_b38	455	259	43485	20389	0.823698	0.0138382	585	0.000452331	not_sig
chr6_7602624_C_T_b38	655	55	57086	6770	1.41233	0.0138943	586	0.000453104	not_sig
chr7_27152469_A_AGGCCT_b38	468	236	45116	18630	0.818872	0.0139637	587	0.000453878	not_sig
chr17_18790964_G_A_b38	91	629	10230	53616	0.758245	0.0139829	588	0.000454651	not_sig
chrX_53430674_C_T_b38	393	321	29833	20220	0.829797	0.0140079	589	0.000455424	not_sig
chr16_68217881_C_G_b38	578	140	53645	10245	0.788465	0.0140946	590	0.000456197	not_sig
chr6_149964073_G_C_b38	619	87	57814	6088	0.749226	0.0143449	591	0.000456971	not_sig
chr1_151781636_T_C_b38	303	389	30913	32817	0.826896	0.0143458	592	0.000457744	not_sig
chr11_129947096_A_G_b38	633	87	57917	5963	0.749106	0.0143777	593	0.000458517	not_sig
chr15_90266401_G_A_b38	41	677	2461	61461	1.51246	0.0145337	594	0.00045929	not_sig
chr3_58193139_C_T_b38	513	193	43290	20050	1.23108	0.014549	595	0.000460063	not_sig
chr3_184331355_C_T_b38	694	26	62507	1399	0.597414	0.0146485	596	0.000460837	not_sig
chr10_11755437_T_C_b38	3	717	43	63875	6.21534	0.0146502	597	0.00046161	not_sig
chr15_94340879_G_C_b38	352	352	34871	28957	0.830403	0.0148324	598	0.000462383	not_sig
chr19_11487668_T_C_b38	606	88	57611	6281	0.750781	0.0148607	599	0.000463156	not_sig
chr8_144528200_C_T_b38	705	3	63860	44	0.161917	0.0148627	600	0.000463929	not_sig
chr8_142742440_C_G_b38	520	138	52863	11047	0.787439	0.0148769	601	0.000464703	not_sig
chrX_154400814_G_A_b38	663	57	44383	5341	1.39973	0.0149566	602	0.000465476	not_sig
chr1_982112_C_T_b38	551	137	53394	10466	0.78835	0.0149773	603	0.000466249	not_sig
chr12_52304976_T_C_b38	710	8	63520	276	0.385627	0.0149808	604	0.000467022	not_sig
chr7_75994575_G_A_b38	596	84	57820	6076	0.745601	0.0149944	605	0.000467796	not_sig
chr4_3132744_G_A_b38	718	2	63887	15	0.0842894	0.0150913	606	0.000468569	not_sig
chr19_4558419_C_G_b38	426	284	35410	28450	1.20517	0.0151146	607	0.000469342	not_sig
chr17_40022374_A_G_b38	466	248	38831	25023	1.21086	0.0151454	608	0.000470115	not_sig
chr16_67979568_T_C_b38	556	164	51658	12228	0.802507	0.0151714	609	0.000470888	not_sig
chr6_57046776_A_G_b38	507	183	49269	14345	0.806647	0.0151986	610	0.000471662	not_sig
chr10_75095568_A_G_b38	496	220	46873	17005	0.817924	0.0153605	611	0.000472435	not_sig
chr16_3091689_G_T_b38	704	12	63389	495	0.458124	0.0154279	612	0.000473208	not_sig
chr12_122204614_C_G_b38	530	150	47128	16696	1.25175	0.0157234	613	0.000473981	not_sig
chr22_37609137_T_C_b38	684	20	62787	1029	0.560495	0.0157465	614	0.000474755	not_sig
chr3_183651103_C_T_b38	496	222	46748	17134	0.818888	0.0157468	615	0.000475528	not_sig
chrX_153771820_C_T_b38	116	598	9961	40126	0.781411	0.0158368	616	0.000476301	not_sig
chr1_1615869_C_T_b38	234	486	18028	45528	1.21594	0.0159007	617	0.000477074	not_sig
chr16_31087690_T_C_b38	698	22	62753	1141	0.576878	0.0159218	618	0.000477847	not_sig
chr15_99126774_G_A_b38	585	69	58865	5039	0.725762	0.0159799	619	0.000478621	not_sig
chr8_95269252_A_AGGGGACCTGGC_b38	679	41	58679	5185	1.46336	0.0160146	620	0.000479394	not_sig
chr15_74203214_TTG_T_b38	431	245	43500	20318	0.82168	0.0160638	621	0.000480167	not_sig
chr9_92600383_G_A_b38	497	223	46670	17198	0.821281	0.0160813	622	0.00048094	not_sig
chr16_89694244_C_T_b38	409	303	39507	24337	0.831522	0.0161618	623	0.000481713	not_sig
chr16_2211682_C_T_b38	371	349	29994	33878	1.20069	0.01621	624	0.000482487	not_sig
chr3_94094327_C_G_b38	495	197	48256	15620	0.813334	0.016349	625	0.00048326	not_sig
chr17_50110182_G_C_b38	543	123	54280	9584	0.779474	0.0163635	626	0.000484033	not_sig
chr17_50106924_G_A_b38	176	500	19366	44502	0.808877	0.0163964	627	0.000484806	not_sig
chr8_17210065_C_T_b38	534	142	52769	11099	0.790966	0.0164432	628	0.00048558	not_sig
chr6_36970022_G_A_b38	708	4	63826	84	0.232946	0.0164564	629	0.000486353	not_sig
chr10_73348388_T_G_b38	612	62	59597	4305	0.713031	0.0164629	630	0.000487126	not_sig
chr7_100686291_T_C_b38	717	3	62945	923	3.5046	0.0165203	631	0.000487899	not_sig
chr3_39101133_G_A_b38	634	22	62632	1262	0.58067	0.0165739	632	0.000488672	not_sig
chr16_66580194_G_C_b38	619	29	62099	1801	0.619044	0.0166572	633	0.000489446	not_sig
chr6_30950623_A_G_b38	436	284	40403	21881	0.831422	0.0166596	634	0.000490219	not_sig
chr6_43013895_C_A_b38	708	10	62063	1815	2.07051	0.0167504	635	0.000490992	not_sig
chr14_24269173_T_C_b38	542	136	53331	10555	0.788749	0.016753	636	0.000491765	not_sig
chr1_959193_G_A_b38	91	629	6290	57588	1.32456	0.0167682	637	0.000492538	not_sig
chr12_56324638_T_C_b38	687	33	59552	4354	1.52207	0.0168508	638	0.000493312	not_sig
chr1_3494295_C_T_b38	718	2	63888	16	0.0899073	0.0168528	639	0.000494085	not_sig
chr5_179080003_A_G_b38	711	5	62717	1195	2.70946	0.0168904	640	0.000494858	not_sig
chr11_60898869_G_A_b38	401	313	38717	25155	0.832382	0.0169225	641	0.000495631	not_sig
chr17_82716963_CG_C_b38	457	239	39089	24737	1.21007	0.0170266	642	0.000496405	not_sig
chr19_45322996_C_G_b38	343	365	33834	30008	0.83346	0.0170311	643	0.000497178	not_sig
chr14_21476899_C_G_b38	635	17	63012	890	0.527584	0.0170786	644	0.000497951	not_sig
chr9_114424397_A_G_b38	152	566	15992	47878	0.804008	0.0170953	645	0.000498724	not_sig
chr17_4735268_G_A_b38	377	343	36327	27557	0.833776	0.0170974	646	0.000499497	not_sig
chr3_46677275_C_T_b38	713	3	63858	46	0.171203	0.0171121	647	0.000500271	not_sig
chr6_154406691_C_T_b38	370	330	36608	27220	0.833681	0.0172273	648	0.000501044	not_sig
chr16_31130950_A_G_b38	502	214	41987	21795	1.21768	0.0173404	649	0.000501817	not_sig
chr11_62666701_G_A_b38	535	185	44852	19028	1.22686	0.0173608	650	0.00050259	not_sig
chr17_80036614_C_A_b38	646	74	55348	8494	1.33971	0.0173797	651	0.000503363	not_sig
chr3_129401900_A_G_b38	555	137	53444	10440	0.79136	0.0173987	652	0.000504137	not_sig
chr1_223712428_A_C_b38	714	6	63567	177	0.331351	0.0174089	653	0.00050491	not_sig
chr11_1754865_G_A_b38	717	3	63784	46	0.172363	0.0174139	654	0.000505683	not_sig
chr7_30752232_G_A_b38	457	243	38854	24974	1.20882	0.017499	655	0.000506456	not_sig
chr17_50095415_A_C_b38	187	529	19318	44574	0.815653	0.0175311	656	0.00050723	not_sig
chr3_49340035_G_C_b38	658	2	63868	18	0.0927225	0.0175601	657	0.000508003	not_sig
chrX_48983066_G_A_b38	701	3	50416	37	0.171487	0.0175798	658	0.000508776	not_sig
chr14_22766599_G_A_b38	363	357	35062	28822	0.835845	0.0176411	659	0.000509549	not_sig
chrX_48058816_A_G_b38	417	303	26569	23163	1.19981	0.0177028	660	0.000510322	not_sig
chr2_98555780_C_T_b38	652	40	58647	5263	1.46277	0.0177496	661	0.000511096	not_sig
chrX_154469004_T_C_b38	113	607	6355	43836	1.28412	0.0178131	662	0.000511869	not_sig
chr12_69699426_G_C_b38	233	453	24514	39334	0.8253	0.0178421	663	0.000512642	not_sig
chrX_17725820_C_T_b38	701	19	49501	735	0.54782	0.0178557	664	0.000513415	not_sig
chr21_33230000_C_A_b38	515	203	42987	20635	1.21781	0.0179475	665	0.000514189	not_sig
chr9_136952816_G_A_b38	697	9	62161	1703	2.12171	0.0179556	666	0.000514962	not_sig
chr21_45997781_G_C_b38	615	75	58564	5284	0.739854	0.0180849	667	0.000515735	not_sig
chr16_89193585_A_G_b38	430	278	35830	27838	1.20175	0.0181317	668	0.000516508	not_sig
chr17_43028755_C_T_b38	436	256	42963	20891	0.828154	0.018174	669	0.000517281	not_sig
chr7_99494729_T_TTTTTA_b38	626	40	61295	2619	0.66869	0.0181929	670	0.000518055	not_sig
chr19_21637961_C_T_b38	513	205	42949	20897	1.21757	0.0181998	671	0.000518828	not_sig
chr1_161727208_C_G_b38	375	323	31172	32202	1.19935	0.0182287	672	0.000519601	not_sig
chr13_75804601_A_T_b38	433	245	43536	20356	0.826353	0.0182485	673	0.000520374	not_sig
chr2_241064070_C_T_b38	572	132	53928	9846	0.791166	0.0182695	674	0.000521147	not_sig
chr15_75727041_C_T_b38	717	3	63847	47	0.175936	0.0183276	675	0.000521921	not_sig
chrX_2964339_A_G_b38	707	5	50208	104	0.292894	0.0186134	676	0.000522694	not_sig
chr20_49812971_G_C_b38	362	330	36180	27526	0.834582	0.0186135	677	0.000523467	not_sig
chr3_191358113_C_T_b38	445	257	43159	20665	0.829069	0.0186664	678	0.00052424	not_sig
chr10_30459569_T_C_b38	588	84	57675	6225	0.755527	0.0187025	679	0.000525014	not_sig
chr19_35678012_T_C_b38	331	375	32762	31040	0.836273	0.0188964	680	0.000525787	not_sig
chr16_1434337_A_G_b38	99	619	10901	52975	0.777229	0.018947	681	0.00052656	not_sig
chr9_34637693_T_G_b38	548	134	53511	10397	0.794586	0.0190283	682	0.000527333	not_sig
chr12_88114481_T_C_b38	699	17	63037	829	0.540738	0.0190312	683	0.000528106	not_sig
chr12_6465878_G_T_b38	524	196	43908	19982	1.21666	0.0190322	684	0.00052888	not_sig
chr10_132203884_C_G_b38	589	99	56574	7328	0.770635	0.019062	685	0.000529653	not_sig
chrX_153954909_A_G_b38	565	155	40858	8996	0.802581	0.0191462	686	0.000530426	not_sig
chr11_102606646_G_T_b38	361	355	34976	28836	0.838385	0.0192543	687	0.000531199	not_sig
chr11_130894645_A_T_b38	429	291	40786	23110	0.83532	0.019299	688	0.000531972	not_sig
chr19_46016106_TCGTCCCGGGAGCGCTCCG_T_b38	717	3	63778	48	0.179874	0.0193685	689	0.000532746	not_sig
chr20_35279894_A_G_b38	52	668	6266	57638	0.716053	0.0193913	690	0.000533519	not_sig
chr7_100037746_C_A_b38	275	425	27923	35969	0.833509	0.0194168	691	0.000534292	not_sig
chr12_52691088_C_T_b38	495	217	41671	22161	1.21311	0.019423	692	0.000535065	not_sig
chrX_135160400_A_G_b38	624	44	48043	2302	0.679528	0.0194993	693	0.000535839	not_sig
chr12_120151356_A_G_b38	136	584	14397	49489	0.800503	0.0195558	694	0.000536612	not_sig
chr1_167697875_CA_C_b38	663	17	63035	879	0.543841	0.0195853	695	0.000537385	not_sig
chr7_100149507_G_A_b38	257	463	25517	38303	0.833212	0.0195888	696	0.000538158	not_sig
chr20_5863476_A_G_b38	438	252	43192	20586	0.828404	0.0196174	697	0.000538931	not_sig
chr11_68036689_C_T_b38	157	541	16892	46986	0.807216	0.0196566	698	0.000539705	not_sig
chr1_26571651_A_G_b38	500	220	46847	16991	0.824298	0.0196808	699	0.000540478	not_sig
chr16_2211656_A_G_b38	368	350	29898	33940	1.19357	0.0196812	700	0.000541251	not_sig
chr17_47831287_T_A_b38	695	3	63840	50	0.181443	0.0197406	701	0.000542024	not_sig
chr9_33290534_A_G_b38	135	581	9974	53934	1.25647	0.0198179	702	0.000542797	not_sig
chr3_186784876_C_T_b38	648	68	59315	4583	0.736294	0.0198189	703	0.000543571	not_sig
chr16_31183958_C_T_b38	306	414	29953	33905	0.836651	0.0198433	704	0.000544344	not_sig
chr1_117060338_C_A_b38	79	641	8935	54953	0.757994	0.0199142	705	0.000545117	not_sig
chr11_64317591_G_C_b38	621	57	59967	3947	0.717087	0.0200289	706	0.00054589	not_sig
chr14_93925353_G_A_b38	294	406	29650	34236	0.836141	0.02011	707	0.000546664	not_sig
chr6_151057215_C_G_b38	383	335	36844	27030	0.838751	0.0204923	708	0.000547437	not_sig
chr9_136462827_G_A_b38	602	118	55365	8517	0.784812	0.020543	709	0.00054821	not_sig
chr6_149451509_A_G_b38	329	373	32692	31074	0.838384	0.0205851	710	0.000548983	not_sig
chr17_44321389_C_A_b38	415	305	39494	24308	0.837464	0.020587	711	0.000549756	not_sig
chr3_186160599_G_A_b38	713	7	62498	1418	2.31101	0.0205944	712	0.00055053	not_sig
chr12_26916050_A_T_b38	697	23	60649	3259	1.62842	0.0206764	713	0.000551303	not_sig
chr17_46872859_T_C_b38	578	92	56957	6917	0.762976	0.0206772	714	0.000552076	not_sig
chr2_36849451_T_C_b38	638	82	58243	5641	0.753562	0.0207024	715	0.000552849	not_sig
chr15_90956756_G_T_b38	636	82	58213	5659	0.753985	0.0207297	716	0.000553623	not_sig
chr16_89696855_T_C_b38	340	378	27499	36385	1.19013	0.0208227	717	0.000554396	not_sig
chr15_40296801_A_G_b38	524	194	49014	14858	0.818785	0.0208911	718	0.000555169	not_sig
chr1_152354993_C_T_b38	608	102	51167	6641	0.773654	0.0208913	719	0.000555942	not_sig
chr17_50106107_G_A_b38	533	183	45011	18853	1.21994	0.0209557	720	0.000556715	not_sig
chr1_155062156_C_G_b38	595	125	50510	13300	1.25338	0.0209945	721	0.000557489	not_sig
chr3_13397330_A_G_b38	346	372	27988	35856	1.19158	0.0210223	722	0.000558262	not_sig
chr6_26597156_G_A_b38	666	28	62269	1635	0.624543	0.0210955	723	0.000559035	not_sig
chr6_31862816_A_C_b38	628	36	61566	2314	0.655661	0.021126	724	0.000559808	not_sig
chr1_1359138_C_T_b38	65	655	4346	59538	1.35949	0.0212183	725	0.000560581	not_sig
chr16_72077049_C_G_b38	421	279	40879	22605	0.834415	0.0213301	726	0.000561355	not_sig
chr9_137353692_A_G_b38	694	26	60292	3552	1.57253	0.0214607	727	0.000562128	not_sig
chr9_16575480_C_T_b38	62	642	4190	59728	1.37664	0.0214686	728	0.000562901	not_sig
chr9_127451229_A_G_b38	318	400	25551	38315	1.19214	0.0215247	729	0.000563674	not_sig
chr17_7846914_T_C_b38	549	139	38444	12136	1.24682	0.0217049	730	0.000564448	not_sig
chr6_32043937_A_G_b38	423	295	39638	23164	0.837954	0.0217375	731	0.000565221	not_sig
chr19_52300416_CTG_C_b38	219	499	16987	46821	1.20967	0.0218513	732	0.000565994	not_sig
chr14_24117624_C_T_b38	663	51	60589	3305	0.709122	0.0218578	733	0.000566767	not_sig
chr8_120197830_T_C_b38	348	370	33696	30144	0.841395	0.0218582	734	0.00056754	not_sig
chr9_137613579_A_G_b38	600	120	55160	8720	0.790428	0.0218983	735	0.000568314	not_sig
chr6_145804330_T_G_b38	345	315	36228	27620	0.835003	0.0220083	736	0.000569087	not_sig
chr18_63953532_G_A_b38	509	165	50591	13295	0.810679	0.022059	737	0.00056986	not_sig
chr7_100102003_T_C_b38	279	427	27996	35824	0.836093	0.0220658	738	0.000570633	not_sig
chr3_130091391_C_T_b38	376	300	38306	25548	0.835905	0.0221	739	0.000571406	not_sig
chr11_65297219_G_A_b38	583	115	55306	8584	0.786843	0.022157	740	0.00057218	not_sig
chr10_49693892_C_T_b38	395	303	33339	30551	1.19461	0.0222075	741	0.000572953	not_sig
chr15_89912147_C_G_b38	163	543	12523	51337	1.23058	0.0222478	742	0.000573726	not_sig
chr3_58193301_T_C_b38	470	180	43464	20374	1.22397	0.0222868	743	0.000574499	not_sig
chr16_4686315_C_T_b38	327	393	26286	37540	1.1883	0.0223721	744	0.000575273	not_sig
chr19_52116973_T_C_b38	714	2	63889	19	0.106169	0.0223955	745	0.000576046	not_sig
chr11_1456567_C_T_b38	542	178	45610	18252	1.21851	0.0224526	746	0.000576819	not_sig
chr10_15103949_T_C_b38	708	12	61916	1980	1.88675	0.0225648	747	0.000577592	not_sig
chr1_1327211_C_T_b38	63	657	4169	59745	1.37418	0.0226238	748	0.000578365	not_sig
chr1_153940147_G_A_b38	661	59	59989	3875	0.723685	0.0226651	749	0.000579139	not_sig
chr19_52950524_C_T_b38	438	282	41177	22211	0.837796	0.0227053	750	0.000579912	not_sig
chr9_33047400_T_C_b38	373	307	37809	26037	0.836693	0.022871	751	0.000580685	not_sig
chr3_128069629_C_T_b38	632	16	63057	849	0.531828	0.0229008	752	0.000581458	not_sig
chr9_72210791_T_C_b38	462	188	47897	15967	0.819217	0.0229147	753	0.000582232	not_sig
chr11_64259996_T_C_b38	651	63	59680	4224	0.731367	0.0229423	754	0.000583005	not_sig
chr1_155015050_C_T_b38	383	337	36661	27157	0.841873	0.0229493	755	0.000583778	not_sig
chr17_7038306_C_T_b38	709	11	63441	461	0.468365	0.0229773	756	0.000584551	not_sig
chr15_90256050_A_G_b38	471	197	47540	16330	0.821262	0.0229911	757	0.000585324	not_sig
chrX_103309770_T_C_b38	710	2	50284	15	0.105898	0.0230322	758	0.000586098	not_sig
chr15_45402412_C_T_b38	505	213	47351	16519	0.827116	0.0231235	759	0.000586871	not_sig
chr15_45402381_C_T_b38	505	213	47360	16526	0.827309	0.0231374	760	0.000587644	not_sig
chr2_132038361_G_A_b38	428	288	38246	21590	0.838915	0.0231967	761	0.000588417	not_sig
chr4_40776129_C_T_b38	117	597	12630	51246	0.795185	0.0232037	762	0.00058919	not_sig
chr15_88913313_G_T_b38	440	258	42872	20972	0.834255	0.0232633	763	0.000589964	not_sig
chr1_154572175_G_T_b38	622	76	58509	5367	0.750733	0.0234836	764	0.000590737	not_sig
chr7_45080854_C_T_b38	408	312	38843	24991	0.841349	0.0234974	765	0.00059151	not_sig
chr12_6463867_C_T_b38	717	3	63850	52	0.194644	0.023548	766	0.000592283	not_sig
chr16_57771264_A_G_b38	129	591	9497	54409	1.25051	0.0236308	767	0.000593057	not_sig
chr18_57571588_A_G_b38	660	46	60950	2942	0.692556	0.0236639	768	0.00059383	not_sig
chr1_3478475_G_A_b38	117	603	8500	55388	1.26434	0.0236968	769	0.000594603	not_sig
chr14_22766488_C_T_b38	360	358	34737	29087	0.842027	0.023732	770	0.000595376	not_sig
chr14_104882883_T_G_b38	218	490	22223	41473	0.830277	0.0237347	771	0.000596149	not_sig
chr6_36685820_C_T_b38	614	60	59676	4232	0.72571	0.0237393	772	0.000596923	not_sig
chr17_81672654_G_A_b38	640	26	62341	1581	0.624259	0.0238253	773	0.000597696	not_sig
chr6_73416152_A_G_b38	320	330	28535	35175	1.19534	0.0238889	774	0.000598469	not_sig
chr19_38501000_C_G_b38	526	132	53202	10672	0.799337	0.0239826	775	0.000599242	not_sig
chr17_19416061_T_C_b38	682	18	62746	920	0.555538	0.0241103	776	0.000600015	not_sig
chr7_149777533_G_A_b38	646	60	59840	4048	0.728333	0.0241411	777	0.000600789	not_sig
chr12_6463421_G_C_b38	533	187	44811	19063	1.21253	0.0241923	778	0.000601562	not_sig
chr5_7878079_T_C_b38	619	101	56672	7192	0.777769	0.0242159	779	0.000602335	not_sig
chr10_102403812_G_A_b38	445	275	42061	21783	0.838041	0.0242378	780	0.000603108	not_sig
chr1_247896410_T_C_b38	275	445	21729	41911	1.19196	0.0242878	781	0.000603882	not_sig
chrX_14014175_C_T_b38	517	203	33924	16091	1.20801	0.0243202	782	0.000604655	not_sig
chr15_42161765_T_C_b38	688	16	63116	794	0.54094	0.0243224	783	0.000605428	not_sig
chr7_45027668_G_C_b38	543	177	50409	13461	0.819211	0.0243646	784	0.000606201	not_sig
chr11_65581592_G_A_b38	400	320	32736	31054	1.18577	0.0244576	785	0.000606974	not_sig
chr17_47820136_G_A_b38	715	3	63851	53	0.19783	0.0245041	786	0.000607748	not_sig
chr1_155212373_C_T_b38	326	394	31616	32256	0.84416	0.02454	787	0.000608521	not_sig
chr7_101217355_T_C_b38	488	182	48892	14928	0.818676	0.0245731	788	0.000609294	not_sig
chr4_78317342_G_A_b38	514	204	43158	20686	1.20767	0.0246154	789	0.000610067	not_sig
chr1_154567992_C_T_b38	643	77	58599	5285	0.753139	0.0246492	790	0.00061084	not_sig
chr5_180739362_G_A_b38	718	2	63892	20	0.112377	0.0247052	791	0.000611614	not_sig
chr19_46040269_TGGAAGCAGGGCC_T_b38	718	2	63878	20	0.112402	0.0247151	792	0.000612387	not_sig
chr1_180271375_T_C_b38	680	40	58898	4994	1.44144	0.0249223	793	0.00061316	not_sig
chr20_47663405_T_G_b38	441	279	41669	22169	0.840945	0.0249279	794	0.000613933	not_sig
chr3_9843425_C_T_b38	656	64	59586	4302	0.740031	0.0250079	795	0.000614707	not_sig
chr8_141216009_C_T_b38	444	218	45381	18441	0.827631	0.0250125	796	0.00061548	not_sig
chr3_49722937_G_T_b38	720	0	63537	381	inf	0.0250154	797	0.000616253	not_sig
chr19_51627235_G_A_b38	655	59	56907	6955	1.35682	0.0250296	798	0.000617026	not_sig
chr15_74330192_A_G_b38	638	82	58154	5676	0.759398	0.025078	799	0.000617799	not_sig
chr3_36874323_T_G_b38	251	459	25204	38596	0.837402	0.0251083	800	0.000618573	not_sig
chr7_7640254_G_A_b38	572	78	57935	5957	0.754029	0.0251282	801	0.000619346	not_sig
chr22_29145437_GC_G_b38	669	51	57803	6087	1.38137	0.0251324	802	0.000620119	not_sig
chr12_56360038_C_A_b38	686	34	59544	4338	1.46993	0.025177	803	0.000620892	not_sig
chr6_31951801_A_G_b38	282	434	27825	36043	0.841676	0.025328	804	0.000621666	not_sig
chr7_24815146_G_A_b38	501	211	47322	16538	0.829803	0.0253428	805	0.000622439	not_sig
chr7_151051782_C_G_b38	571	147	52827	11011	0.809636	0.0254463	806	0.000623212	not_sig
chr1_1439425_G_C_b38	706	14	63133	663	0.529583	0.0256765	807	0.000623985	not_sig
chr9_127928133_G_C_b38	78	642	5371	58525	1.32387	0.0257106	808	0.000624758	not_sig
chr16_2088196_TAGTG_T_b38	704	16	63070	786	0.548343	0.0257223	809	0.000625532	not_sig
chr16_405497_G_C_b38	638	82	58180	5720	0.764943	0.0257298	810	0.000626305	not_sig
chr6_31785749_G_A_b38	641	43	61059	2855	0.697021	0.0257417	811	0.000627078	not_sig
chr14_96238024_G_C_b38	461	253	43780	20090	0.836151	0.0257977	812	0.000627851	not_sig
chr3_194648850_C_A_b38	548	128	53796	10052	0.799969	0.0258461	813	0.000628624	not_sig
chr20_35434589_C_A_b38	286	434	22795	41053	1.18681	0.0258572	814	0.000629398	not_sig
chr4_881883_T_C_b38	577	141	53384	10502	0.80504	0.0258615	815	0.000630171	not_sig
chr16_2205762_A_C_b38	660	60	56847	6961	1.34697	0.025894	816	0.000630944	not_sig
chr15_82344707_G_T_b38	696	24	59305	1265	0.618582	0.0259404	817	0.000631717	not_sig
chr6_43142317_T_G_b38	566	104	55501	7979	0.782403	0.0259586	818	0.000632491	not_sig
chr6_42961020_T_G_b38	265	441	26639	37217	0.839519	0.0259695	819	0.000633264	not_sig
chr19_2812282_G_A_b38	708	2	63887	21	0.116362	0.0261864	820	0.000634037	not_sig
chr11_124880551_CCGGAGT_C_b38	506	214	47209	16577	0.830267	0.0262729	821	0.00063481	not_sig
chr15_78286140_TG_T_b38	506	176	49717	14191	0.820627	0.0262749	822	0.000635583	not_sig
chr5_134115992_C_A_b38	621	93	57255	6639	0.77428	0.0263519	823	0.000636357	not_sig
chr16_4332270_G_A_b38	711	3	63849	55	0.204154	0.0264627	824	0.00063713	not_sig
chr17_41728331_G_A_b38	174	542	13337	50543	1.21661	0.0265732	825	0.000637903	not_sig
chr22_41387655_C_T_b38	509	177	49706	14176	0.820143	0.0266043	826	0.000638676	not_sig
chr10_73802403_C_A_b38	319	401	25666	38192	1.18375	0.02663	827	0.000639449	not_sig
chr22_19331099_T_C_b38	35	673	2136	61782	1.50423	0.0267009	828	0.000640223	not_sig
chr16_67288215_G_C_b38	691	29	62195	1691	0.647841	0.0267182	829	0.000640996	not_sig
chr7_64928711_A_C_b38	408	312	33487	30313	1.18375	0.0267826	830	0.000641769	not_sig
chr16_2206460_C_G_b38	408	312	33537	30343	1.18315	0.0268026	831	0.000642542	not_sig
chr6_43018625_C_T_b38	621	93	57228	6666	0.777795	0.0268217	832	0.000643316	not_sig
chr5_176862787_C_T_b38	654	16	63058	854	0.553574	0.026851	833	0.000644089	not_sig
chr9_133568447_C_T_b38	718	2	63883	21	0.118013	0.0268675	834	0.000644862	not_sig
chr19_872089_A_G_b38	526	158	46443	17081	1.2244	0.0268917	835	0.000645635	not_sig
chr19_12581187_G_A_b38	386	334	31551	32275	1.18221	0.0269765	836	0.000646408	not_sig
chrX_53198966_C_A_b38	27	693	1207	48979	1.581	0.0270007	837	0.000647182	not_sig
chr11_124750691_C_T_b38	607	93	53409	10461	1.27839	0.0270683	838	0.000647955	not_sig
chr19_54095339_T_G_b38	650	44	60985	2889	0.699818	0.0273743	839	0.000648728	not_sig
chr3_38905381_A_T_b38	105	609	7642	56268	1.26948	0.0275775	840	0.000649501	not_sig
chr20_62322015_A_G_b38	70	650	4789	59003	1.32683	0.0276939	841	0.000650274	not_sig
chr15_40472350_G_A_b38	595	71	58673	5249	0.749716	0.0277093	842	0.000651048	not_sig
chr1_109627335_A_G_b38	224	496	22383	41473	0.836784	0.0277891	843	0.000651821	not_sig
chr5_79990596_C_T_b38	692	14	63224	688	0.537879	0.0277981	844	0.000652594	not_sig
chr17_41054850_G_T_b38	708	2	61531	21	0.120817	0.0280443	845	0.000653367	not_sig
chr7_100112961_A_AG_b38	285	431	28016	35786	0.844646	0.0280691	846	0.000654141	not_sig
chr13_102821147_T_G_b38	489	165	50070	13816	0.817767	0.0281487	847	0.000654914	not_sig
chr17_50110106_G_A_b38	555	125	54118	9768	0.801395	0.0281722	848	0.000655687	not_sig
chr13_26214014_C_T_b38	717	3	63856	56	0.209597	0.0282383	849	0.00065646	not_sig
chr1_16201723_G_T_b38	384	300	33155	30691	1.18487	0.028363	850	0.000657233	not_sig
chr2_218403190_A_G_b38	252	466	24963	38863	0.841888	0.0283798	851	0.000658007	not_sig
chr2_10774894_A_G_b38	444	268	42355	21531	0.842185	0.0283826	852	0.00065878	not_sig
chr14_35278712_C_T_b38	628	38	61337	2543	0.685172	0.0284066	853	0.000659553	not_sig
chr16_4336813_T_C_b38	12	708	1956	61944	0.536758	0.0284418	854	0.000660326	not_sig
chr7_128850499_T_C_b38	529	155	51552	12326	0.81602	0.0284822	855	0.0006611	not_sig
chr2_132038355_A_AAGG_b38	428	288	37855	21495	0.84385	0.0284988	856	0.000661873	not_sig
chr9_69820797_C_G_b38	595	101	56372	7510	0.784824	0.0285785	857	0.000662646	not_sig
chr9_136418951_G_A_b38	562	146	52759	11149	0.813435	0.0285888	858	0.000663419	not_sig
chr18_45917745_A_G_b38	348	372	28238	35636	1.18057	0.0285997	859	0.000664192	not_sig
chr7_100822533_A_G_b38	621	67	59117	4769	0.747707	0.028632	860	0.000664966	not_sig
chr10_70145939_A_G_b38	429	291	35419	28409	1.18245	0.0287128	861	0.000665739	not_sig
chr22_41507739_G_T_b38	549	171	50843	13013	0.821717	0.0287743	862	0.000666512	not_sig
chr20_62797062_T_G_b38	674	40	46508	3924	1.42168	0.0287868	863	0.000667285	not_sig
chr6_32210996_T_C_b38	305	359	32104	31764	0.840585	0.0288507	864	0.000668058	not_sig
chr6_167376005_T_C_b38	478	238	39964	16690	0.838761	0.0288634	865	0.000668832	not_sig
chr10_94298676_G_A_b38	538	134	53201	10651	0.8038	0.0288782	866	0.000669605	not_sig
chr1_28237768_A_G_b38	536	184	45153	18723	1.20791	0.0289694	867	0.000670378	not_sig
chr1_15483381_G_A_b38	501	203	47796	16070	0.829786	0.0289915	868	0.000671151	not_sig
chr19_50402505_T_C_b38	715	5	63702	148	0.332234	0.0290075	869	0.000671925	not_sig
chr9_26916072_C_T_b38	657	63	59656	4248	0.7426	0.0290844	870	0.000672698	not_sig
chr7_2538326_G_A_b38	718	2	63878	22	0.123642	0.0291005	871	0.000673471	not_sig
chrX_154403570_C_T_b38	605	45	47845	2507	0.704467	0.0292947	872	0.000674244	not_sig
chr7_149806755_T_G_b38	573	147	52835	11041	0.814562	0.0292997	873	0.000675017	not_sig
chr16_67877614_T_C_b38	573	147	52813	11037	0.814606	0.0293057	874	0.000675791	not_sig
chr22_29740617_C_T_b38	704	2	63172	732	4.07877	0.0293133	875	0.000676564	not_sig
chr10_97578213_G_C_b38	718	2	63548	22	0.124284	0.0293757	876	0.000677337	not_sig
chr1_9275114_G_T_b38	566	152	48108	15760	1.21986	0.0294694	877	0.00067811	not_sig
chr16_75530274_C_G_b38	717	3	63857	57	0.213336	0.0294828	878	0.000678883	not_sig
chr12_11186947_CA_C_b38	152	568	15734	48144	0.818839	0.0295143	879	0.000679657	not_sig
chr20_62417346_G_A_b38	350	328	35612	28204	0.845101	0.0295513	880	0.00068043	not_sig
chr16_265558_C_G_b38	564	156	52105	11767	0.816471	0.0295903	881	0.000681203	not_sig
chr7_151075985_G_C_b38	340	380	32740	31020	0.847732	0.0296105	882	0.000681976	not_sig
chr19_39424997_G_A_b38	322	398	31187	32663	0.847335	0.0296224	883	0.00068275	not_sig
chr19_18446225_A_AGCAGGCCACTAG_b38	482	210	41892	21898	1.19978	0.0296278	884	0.000683523	not_sig
chr12_54973394_C_T_b38	500	152	51229	12653	0.812464	0.0297422	885	0.000684296	not_sig
chr3_122752984_G_A_b38	243	469	19350	44522	1.19214	0.0297434	886	0.000685069	not_sig
chr3_127677377_T_C_b38	132	522	15229	48649	0.807804	0.0299941	887	0.000685842	not_sig
chr9_137188619_C_T_b38	717	3	63070	838	3.17555	0.0300622	888	0.000686616	not_sig
chr10_49472987_G_A_b38	394	326	37514	26346	0.848789	0.0300688	889	0.000687389	not_sig
chr22_19144549_G_A_b38	715	3	63080	842	3.1813	0.0301043	890	0.000688162	not_sig
chr16_2210934_G_A_b38	449	271	37268	26590	1.18211	0.0302647	891	0.000688935	not_sig
chr20_2652679_GGGGCGC_G_b38	512	206	42909	20649	1.19606	0.03045	892	0.000689708	not_sig
chr18_75209152_CG_C_b38	305	399	30044	33292	0.84705	0.030521	893	0.000690482	not_sig
chr15_78275511_G_T_b38	570	150	52603	11297	0.816087	0.0306782	894	0.000691255	not_sig
chr15_64750361_G_A_b38	660	4	62840	1070	2.80952	0.0306968	895	0.000692028	not_sig
chr1_204433372_C_T_b38	674	4	63800	108	0.285235	0.0307679	896	0.000692801	not_sig
chr1_151369227_G_A_b38	489	227	41054	22732	1.19279	0.0308106	897	0.000693575	not_sig
chr13_75871180_C_T_b38	359	349	29748	34092	1.17886	0.0308158	898	0.000694348	not_sig
chr17_43071077_T_C_b38	450	264	42727	21137	0.843237	0.0308177	899	0.000695121	not_sig
chr11_130895136_G_A_b38	589	121	50904	12982	1.24142	0.0308204	900	0.000695894	not_sig
chr6_43184835_A_G_b38	569	129	54023	9865	0.805454	0.0308247	901	0.000696667	not_sig
chr9_130678606_C_T_b38	427	231	43942	19894	0.83687	0.031047	902	0.000697441	not_sig
chr14_77413962_C_T_b38	561	159	51816	12038	0.819702	0.0310784	903	0.000698214	not_sig
chr17_10328181_A_C_b38	95	577	11076	52806	0.784961	0.0311582	904	0.000698987	not_sig
chr6_31395114_C_G_b38	351	335	28748	32458	1.18298	0.0311771	905	0.00069976	not_sig
chr1_15428752_C_T_b38	580	116	55080	8810	0.799746	0.0312115	906	0.000700534	not_sig
chr21_44573684_C_G_b38	716	4	63764	102	0.286337	0.0312184	907	0.000701307	not_sig
chrX_101345811_A_AT_b38	696	10	49914	335	0.467123	0.0312211	908	0.00070208	not_sig
chr4_5748234_G_C_b38	376	344	35947	27913	0.848737	0.031244	909	0.000702853	not_sig
chr2_240598644_T_C_b38	620	100	53084	10792	1.26046	0.0313638	910	0.000703626	not_sig
chr16_31110472_G_A_b38	426	288	40637	23221	0.845233	0.0314108	911	0.0007044	not_sig
chr4_185445027_G_A_b38	667	53	57634	6248	1.36431	0.0314371	912	0.000705173	not_sig
chr9_96938445_T_A_b38	709	11	62776	490	0.503102	0.0314545	913	0.000705946	not_sig
chr14_105488368_C_T_b38	556	150	48037	15791	1.21848	0.031598	914	0.000706719	not_sig
chr6_17600388_A_G_b38	485	235	45357	18471	0.840466	0.0316677	915	0.000707492	not_sig
chr19_45810567_A_T_b38	151	551	16010	47874	0.819471	0.0317395	916	0.000708266	not_sig
chr8_9141677_G_C_b38	439	257	42753	21081	0.842279	0.0317538	917	0.000709039	not_sig
chr6_98926884_A_T_b38	664	36	61610	2288	0.684968	0.031832	918	0.000709812	not_sig
chr7_100995424_G_C_b38	599	111	53385	7853	0.793817	0.0318939	919	0.000710585	not_sig
chr16_28951108_C_T_b38	710	6	63544	206	0.383619	0.0319176	920	0.000711359	not_sig
chr22_39319603_C_T_b38	645	17	62991	931	0.560766	0.031945	921	0.000712132	not_sig
chr5_141175227_T_A_b38	394	302	36274	23566	0.847578	0.0319612	922	0.000712905	not_sig
chr15_32718211_G_A_b38	521	155	51328	12486	0.817664	0.0319942	923	0.000713678	not_sig
chr18_31131702_T_C_b38	683	3	63832	62	0.221133	0.0320764	924	0.000714451	not_sig
chr19_56160078_C_T_b38	677	39	61397	2463	0.696372	0.0320814	925	0.000715225	not_sig
chr14_20403687_A_G_b38	621	95	53476	10392	1.27031	0.0321763	926	0.000715998	not_sig
chr9_127447832_T_C_b38	290	430	23248	40620	1.17838	0.032267	927	0.000716771	not_sig
chr20_62337627_T_C_b38	69	651	4752	59156	1.31944	0.032274	928	0.000717544	not_sig
chr10_15860304_A_G_b38	456	208	46286	17586	0.83295	0.0323746	929	0.000718317	not_sig
chrX_101656920_C_G_b38	2	718	18	49901	7.72222	0.0323862	930	0.000719091	not_sig
chr1_230978849_C_T_b38	397	321	37839	25961	0.84853	0.0323885	931	0.000719864	not_sig
chr1_979847_A_G_b38	13	707	2059	61863	0.552457	0.0324029	932	0.000720637	not_sig
chr5_141184004_C_T_b38	538	180	49155	13629	0.828717	0.0324262	933	0.00072141	not_sig
chr16_2206325_C_T_b38	407	313	33522	30320	1.17611	0.0324305	934	0.000722184	not_sig
chr16_74456631_G_A_b38	528	176	45551	18325	1.20689	0.0324889	935	0.000722957	not_sig
chr12_6458621_T_C_b38	534	186	44991	18855	1.20318	0.0325128	936	0.00072373	not_sig
chr13_110715969_C_T_b38	213	503	16703	47137	1.19503	0.0325613	937	0.000724503	not_sig
chr4_24800327_C_T_b38	276	434	22291	41461	1.18285	0.0325943	938	0.000725276	not_sig
chrX_48901927_C_T_b38	267	453	20464	29418	0.847297	0.0326271	939	0.00072605	not_sig
chr19_41903679_C_T_b38	701	17	63038	864	0.565172	0.0326306	940	0.000726823	not_sig
chr1_23383982_C_T_b38	333	387	32118	31760	0.850874	0.0326368	941	0.000727596	not_sig
chr15_82952022_T_C_b38	613	89	57412	6490	0.778597	0.0326372	942	0.000728369	not_sig
chr1_205917248_T_A_b38	646	74	58747	5137	0.763352	0.0326411	943	0.000729143	not_sig
chr1_112712834_C_A_b38	647	73	55686	8186	1.30289	0.0328014	944	0.000729916	not_sig
chr22_21938623_C_A_b38	323	349	33341	30521	0.847222	0.0328143	945	0.000730689	not_sig
chr5_141137849_T_C_b38	579	75	58174	5736	0.761198	0.0328902	946	0.000731462	not_sig
chr14_70907985_G_A_b38	273	447	21762	42032	1.1796	0.0329126	947	0.000732235	not_sig
chr3_47005686_A_AG_b38	325	395	26291	37565	1.17561	0.0329885	948	0.000733009	not_sig
chr6_39906468_G_A_b38	701	19	62907	1001	0.587083	0.0330161	949	0.000733782	not_sig
chr20_44975362_C_T_b38	386	312	32711	31139	1.17772	0.0330227	950	0.000734555	not_sig
chr6_2680498_C_T_b38	615	103	52778	11122	1.25825	0.0330294	951	0.000735328	not_sig
chr11_65279513_C_CT_b38	577	119	54829	9055	0.800769	0.0330502	952	0.000736101	not_sig
chr1_34785628_G_A_b38	340	318	35671	28163	0.844142	0.0330556	953	0.000736875	not_sig
chr3_50287241_T_G_b38	591	95	56610	7136	0.784198	0.0330683	954	0.000737648	not_sig
chr4_3520212_T_A_b38	454	246	43864	19990	0.841057	0.0330827	955	0.000738421	not_sig
chr6_2970334_G_A_b38	221	499	22025	41841	0.841352	0.0332299	956	0.000739194	not_sig
chr18_50286217_C_T_b38	628	74	55383	8483	1.29987	0.0333002	957	0.000739968	not_sig
chr8_143158442_A_G_b38	376	338	36182	27658	0.850353	0.0334283	958	0.000740741	not_sig
chr17_82749052_G_A_b38	227	483	22896	40964	0.840856	0.033503	959	0.000741514	not_sig
chr11_124896232_A_G_b38	461	259	43256	20546	0.845439	0.0335491	960	0.000742287	not_sig
chr15_74203033_A_C_b38	587	127	50425	13429	1.23093	0.0335773	961	0.00074306	not_sig
chr12_55716002_G_C_b38	689	31	62043	1857	0.665237	0.033616	962	0.000743834	not_sig
chr7_73303936_T_C_b38	193	527	14937	48927	1.19959	0.0336365	963	0.000744607	not_sig
chr3_14146199_T_C_b38	246	434	25580	38068	0.843538	0.0337443	964	0.00074538	not_sig
chr16_5033434_C_A_b38	718	2	63882	24	0.134874	0.033766	965	0.000746153	not_sig
chr1_1419214_A_G_b38	650	70	59008	4838	0.761325	0.033814	966	0.000746926	not_sig
chr17_34962027_G_C_b38	635	85	57897	6003	0.774581	0.0339259	967	0.0007477	not_sig
chr17_67959642_T_TCCTCCAGCC_b38	620	98	51839	10333	1.26106	0.0339479	968	0.000748473	not_sig
chr16_18984240_A_G_b38	489	227	41157	22669	1.18651	0.0339542	969	0.000749246	not_sig
chr1_236555959_G_A_b38	284	430	22925	40933	1.17927	0.0341491	970	0.000750019	not_sig
chr3_119294867_C_A_b38	605	47	60478	3364	0.716005	0.0342024	971	0.000750793	not_sig
chr3_48694528_A_G_b38	660	58	59986	3904	0.740587	0.0342836	972	0.000751566	not_sig
chr6_116571676_C_T_b38	510	152	51364	12516	0.817586	0.0342863	973	0.000752339	not_sig
chr5_155015898_G_A_b38	563	157	51961	11923	0.822843	0.0343616	974	0.000753112	not_sig
chr12_11171577_C_A_b38	259	451	25821	38009	0.84535	0.0343679	975	0.000753885	not_sig
chr1_51798392_A_G_b38	507	187	48883	15003	0.832121	0.0344267	976	0.000754659	not_sig
chr16_89646481_C_T_b38	411	303	34205	29625	1.17481	0.0346146	977	0.000755432	not_sig
chr15_44289263_G_A_b38	684	10	62147	1771	1.94919	0.034634	978	0.000756205	not_sig
chr1_212342271_C_T_b38	425	273	41352	22496	0.846906	0.034768	979	0.000756978	not_sig
chr15_101652215_C_T_b38	445	217	45373	18493	0.835815	0.0347957	980	0.000757751	not_sig
chr2_219169108_A_G_b38	232	486	23095	40767	0.842641	0.0348259	981	0.000758525	not_sig
chr9_34569012_T_A_b38	37	667	2362	61536	1.44519	0.0348617	982	0.000759298	not_sig
chr10_122456868_C_CTA_b38	313	405	25327	38487	1.17441	0.0349198	983	0.000760071	not_sig
chr10_103584999_T_C_b38	354	366	28803	34945	1.17346	0.0349387	984	0.000760844	not_sig
chr2_97556905_C_T_b38	268	448	21345	42145	1.18115	0.0349881	985	0.000761618	not_sig
chr1_963087_C_T_b38	669	51	60559	3341	0.723692	0.0350069	986	0.000762391	not_sig
chr2_18584890_G_T_b38	630	44	60881	3007	0.707196	0.0350623	987	0.000763164	not_sig
chr1_109657738_T_C_b38	484	234	40597	23271	1.18563	0.0351274	988	0.000763937	not_sig
chr3_50219957_G_A_b38	691	29	62199	1699	0.650864	0.0351704	989	0.00076471	not_sig
chr11_62567436_G_C_b38	486	234	40667	23175	1.18358	0.035302	990	0.000765484	not_sig
chr7_150397765_G_A_b38	414	306	34122	29646	1.17547	0.0353033	991	0.000766257	not_sig
chr11_62598147_A_G_b38	480	236	40364	23476	1.18293	0.0353335	992	0.00076703	not_sig
chr11_18013045_G_C_b38	275	431	27306	36316	0.848585	0.0354399	993	0.000767803	not_sig
chr12_80444784_C_T_b38	697	21	62531	1163	0.617302	0.0354491	994	0.000768577	not_sig
chr11_18013058_C_G_b38	275	431	27293	36325	0.8492	0.035474	995	0.00076935	not_sig
chr10_71439838_C_T_b38	682	26	62363	1535	0.645643	0.0355101	996	0.000770123	not_sig
chr3_127604987_C_T_b38	150	570	15469	48415	0.823634	0.0356036	997	0.000770896	not_sig
chr11_130915409_T_C_b38	595	123	50886	12986	1.23449	0.0356411	998	0.000771669	not_sig
chr19_54277687_T_C_b38	123	555	9637	53971	1.24117	0.0356882	999	0.000772443	not_sig
chr6_2970990_GA_G_b38	344	376	33013	30783	0.853093	0.0356916	1000	0.000773216	not_sig
chr17_40834751_T_C_b38	619	101	53046	10856	1.25426	0.0358417	1001	0.000773989	not_sig
chr11_64284975_C_T_b38	425	293	40239	23615	0.85126	0.0358739	1002	0.000774762	not_sig
chrX_47145462_T_C_b38	673	3	49714	51	0.230136	0.0359057	1003	0.000775535	not_sig
chr1_1290853_G_A_b38	715	3	63844	62	0.23145	0.0359084	1004	0.000776309	not_sig
chr3_48473057_CT_C_b38	716	4	63805	107	0.30018	0.0359847	1005	0.000777082	not_sig
chr5_141152011_C_T_b38	520	190	48954	14910	0.833564	0.0360397	1006	0.000777855	not_sig
chr22_43133308_G_C_b38	255	461	20383	43487	1.18013	0.0361238	1007	0.000778628	not_sig
chr11_126304143_C_T_b38	673	41	61293	2615	0.700313	0.0361696	1008	0.000779402	not_sig
chr9_128636261_G_A_b38	718	2	63891	25	0.140474	0.0361931	1009	0.000780175	not_sig
chr16_31132672_C_T_b38	501	219	42071	21799	1.18535	0.0362027	1010	0.000780948	not_sig
chr7_102478892_G_T_b38	718	2	63855	25	0.140553	0.0362297	1011	0.000781721	not_sig
chr1_183186093_C_A_b38	584	136	53631	10205	0.817092	0.0362327	1012	0.000782494	not_sig
chr6_43263232_G_C_b38	500	220	41955	21909	1.18682	0.0363244	1013	0.000783268	not_sig
chr11_129857253_G_A_b38	579	137	53544	10328	0.815199	0.0363752	1014	0.000784041	not_sig
chr17_64001974_A_G_b38	399	289	39530	24288	0.848281	0.0364127	1015	0.000784814	not_sig
chr3_57896874_C_T_b38	519	201	48210	15628	0.837023	0.0364395	1016	0.000785587	not_sig
chr17_4945989_G_A_b38	617	35	61510	2366	0.678088	0.0364656	1017	0.00078636	not_sig
chr17_8263060_T_C_b38	213	507	16660	47202	1.1903	0.0365331	1018	0.000787134	not_sig
chr3_47005352_G_C_b38	327	393	26526	37328	1.1709	0.036554	1019	0.000787907	not_sig
chr15_64118285_G_T_b38	171	541	13275	50607	1.20497	0.0366983	1020	0.00078868	not_sig
chr8_119742703_C_T_b38	635	19	62690	1132	0.603488	0.0367088	1021	0.000789453	not_sig
chr4_83455290_T_C_b38	714	4	63776	108	0.302277	0.0367376	1022	0.000790227	not_sig
chr6_2953018_T_C_b38	205	515	20544	43344	0.839829	0.0368269	1023	0.000791	not_sig
chr22_31090925_C_G_b38	642	78	55240	8628	1.28557	0.0369108	1024	0.000791773	not_sig
chr1_204440160_C_A_b38	716	4	63806	108	0.302981	0.0369974	1025	0.000792546	not_sig
chr7_1440650_G_A_b38	620	52	60196	3674	0.727713	0.0370153	1026	0.000793319	not_sig
chrX_153486725_G_A_b38	715	3	50152	49	0.232859	0.0370628	1027	0.000794093	not_sig
chr1_109629083_A_C_b38	225	493	22415	41445	0.843857	0.037076	1028	0.000794866	not_sig
chr15_70763521_T_G_b38	543	147	52287	11607	0.81999	0.0371004	1029	0.000795639	not_sig
chr5_7870860_A_G_b38	344	370	28278	35610	1.17079	0.0372169	1030	0.000796412	not_sig
chr2_130342923_G_A_b38	548	172	50676	13196	0.829645	0.0372609	1031	0.000797185	not_sig
chr19_35785865_A_G_b38	284	434	27773	36091	0.850364	0.037263	1032	0.000797959	not_sig
chr11_66843352_G_GGGCCC_b38	657	63	56678	7164	1.31815	0.0372851	1033	0.000798732	not_sig
chr17_64045317_G_A_b38	3	715	63	63851	4.25248	0.0373059	1034	0.000799505	not_sig
chr19_35267842_G_C_b38	699	9	62283	1569	1.95654	0.0373145	1035	0.000800278	not_sig
chr7_99672916_T_C_b38	64	650	4406	59518	1.33006	0.0373354	1036	0.000801052	not_sig
chr22_20586535_C_T_b38	711	9	62371	1545	1.95692	0.0373368	1037	0.000801825	not_sig
chr16_67284339_A_G_b38	627	93	57087	6673	0.788077	0.0373712	1038	0.000802598	not_sig
chr8_12137765_G_A_b38	162	510	16686	43516	0.828403	0.0374541	1039	0.000803371	not_sig
chr15_43640503_A_G_b38	692	0	63260	366	inf	0.0375072	1040	0.000804144	not_sig
chr21_37493205_C_G_b38	491	165	45395	18443	1.20899	0.0375358	1041	0.000804918	not_sig
chr13_102694309_G_A_b38	449	259	37917	25769	1.17818	0.0375648	1042	0.000805691	not_sig
chr12_132604155_C_T_b38	711	9	62340	1566	1.9845	0.037633	1043	0.000806464	not_sig
chr19_49114449_T_C_b38	412	290	39864	23842	0.849691	0.0376586	1044	0.000807237	not_sig
chr15_30608425_C_G_b38	370	340	30566	32920	1.17204	0.0377431	1045	0.000808011	not_sig
chr17_17303887_C_G_b38	661	41	61180	2692	0.709387	0.037818	1046	0.000808784	not_sig
chrX_101491693_G_T_b38	718	2	50458	20	0.142297	0.037888	1047	0.000809557	not_sig
chr7_45102546_T_C_b38	347	343	34664	29180	0.851612	0.0379898	1048	0.00081033	not_sig
chr19_4538794_C_T_b38	709	3	63812	64	0.23703	0.038006	1049	0.000811103	not_sig
chr19_35501757_C_A_b38	627	43	58355	5549	1.38655	0.0380721	1050	0.000811877	not_sig
chr6_31161839_A_G_b38	157	563	16104	47790	0.827551	0.0381138	1051	0.00081265	not_sig
chr12_112152180_T_G_b38	668	24	62473	1431	0.637547	0.0381184	1052	0.000813423	not_sig
chr6_32837529_C_T_b38	679	41	61264	2630	0.710946	0.0382115	1053	0.000814196	not_sig
chr6_32843868_A_G_b38	677	41	61218	2636	0.711002	0.0382233	1054	0.000814969	not_sig
chr7_65960907_A_G_b38	295	425	28615	35199	0.853827	0.0382468	1055	0.000815743	not_sig
chr1_109713505_G_A_b38	651	69	52648	7242	1.2978	0.0382926	1056	0.000816516	not_sig
chr1_70355119_G_A_b38	714	2	63892	26	0.145276	0.0383088	1057	0.000817289	not_sig
chr22_46679040_T_C_b38	367	353	35013	28811	0.855501	0.0383634	1058	0.000818062	not_sig
chr1_1217733_G_A_b38	606	94	56892	6976	0.790497	0.0383713	1059	0.000818836	not_sig
chr7_100991929_T_C_b38	705	15	62962	764	0.570312	0.0383766	1060	0.000819609	not_sig
chr10_73816205_T_C_b38	219	501	17180	46644	1.1868	0.0384337	1061	0.000820382	not_sig
chr9_125220496_CT_C_b38	300	420	29100	34748	0.852921	0.0384341	1062	0.000821155	not_sig
chr11_63508091_C_T_b38	312	408	25215	38611	1.17097	0.0384694	1063	0.000821928	not_sig
chr17_4901872_C_T_b38	641	47	57914	5812	1.36868	0.0385234	1064	0.000822702	not_sig
chr2_73602245_C_T_b38	522	196	48592	15266	0.83671	0.0386369	1065	0.000823475	not_sig
chr14_104946886_A_G_b38	304	416	29237	34169	0.854043	0.038641	1066	0.000824248	not_sig
chr16_66549125_C_T_b38	691	29	62119	1743	0.668579	0.0386468	1067	0.000825021	not_sig
chr11_74164258_C_G_b38	565	101	52162	11700	1.25475	0.0386828	1068	0.000825794	not_sig
chr7_1475928_C_T_b38	675	45	60970	2920	0.718386	0.0387869	1069	0.000826568	not_sig
chr14_24214060_CA_C_b38	660	60	59824	4090	0.752039	0.0388416	1070	0.000827341	not_sig
chr20_62330691_A_G_b38	685	35	61673	2179	0.691488	0.0389516	1071	0.000828114	not_sig
chr10_11747512_C_G_b38	3	717	64	63858	4.17482	0.0389962	1072	0.000828887	not_sig
chr22_19435727_G_A_b38	614	106	56123	7765	0.801425	0.0390665	1073	0.000829661	not_sig
chr8_91078345_G_C_b38	290	430	23295	40483	1.17203	0.0391793	1074	0.000830434	not_sig
chr16_67390509_T_A_b38	682	38	61462	2410	0.703738	0.0392169	1075	0.000831207	not_sig
chr17_8291000_G_A_b38	381	339	31275	32509	1.16824	0.0392399	1076	0.00083198	not_sig
chr15_90258016_C_A_b38	511	209	47522	16346	0.840991	0.0392805	1077	0.000832753	not_sig
chr19_17228303_G_A_b38	593	95	56687	7195	0.792279	0.0393413	1078	0.000833527	not_sig
chr7_2314399_G_C_b38	698	2	63763	27	0.147782	0.0393741	1079	0.0008343	not_sig
chr20_36773873_ACATGCGTACACCGCCGCCCGACGCG_A_b38	691	17	61393	2491	1.64924	0.0393916	1080	0.000835073	not_sig
chr17_79044103_G_C_b38	458	228	44955	18889	0.844037	0.0393938	1081	0.000835846	not_sig
chr11_320836_C_T_b38	385	311	32784	31058	1.17277	0.0394621	1082	0.00083662	not_sig
chr1_111449473_C_T_b38	395	323	37568	26288	0.855725	0.0395562	1083	0.000837393	not_sig
chr7_100199408_C_G_b38	460	194	47192	16646	0.836368	0.0395663	1084	0.000838166	not_sig
chr6_32043867_A_G_b38	625	95	56949	6859	0.792376	0.0396822	1085	0.000838939	not_sig
chr12_122133442_A_G_b38	447	271	37242	26488	1.17315	0.0397401	1086	0.000839712	not_sig
chr17_41727720_C_T_b38	151	543	11927	51961	1.2115	0.0398227	1087	0.000840486	not_sig
chr16_57769999_A_G_b38	127	591	9508	54348	1.22832	0.0398373	1088	0.000841259	not_sig
chr9_100586352_G_A_b38	449	271	37355	26439	1.17266	0.0399406	1089	0.000842032	not_sig
chr3_184038034_G_A_b38	243	477	23973	39899	0.847867	0.0401318	1090	0.000842805	not_sig
chr19_49851175_C_G_b38	716	4	62816	930	2.65012	0.040143	1091	0.000843578	not_sig
chr2_1542589_G_T_b38	586	90	56997	6913	0.789714	0.0401617	1092	0.000844352	not_sig
chr20_63697022_A_G_b38	44	676	5249	58637	0.727112	0.0401756	1093	0.000845125	not_sig
chr19_38500903_G_A_b38	664	48	58164	5726	1.36183	0.040282	1094	0.000845898	not_sig
chr11_64259213_C_T_b38	499	195	43526	20280	1.1923	0.0402958	1095	0.000846671	not_sig
chr11_17105123_C_T_b38	387	291	33914	29932	1.17375	0.0403564	1096	0.000847445	not_sig
chr19_7637250_G_A_b38	505	181	49072	14690	0.83522	0.0403566	1097	0.000848218	not_sig
chr20_50752537_AGT_A_b38	556	154	47839	16001	1.20759	0.0405352	1098	0.000848991	not_sig
chr11_65208274_C_T_b38	618	46	60660	3244	0.718471	0.0405502	1099	0.000849764	not_sig
chr1_113905767_C_T_b38	547	137	53033	10851	0.81694	0.0405691	1100	0.000850537	not_sig
chrX_149544977_A_G_b38	240	422	16008	33344	1.18462	0.0405841	1101	0.000851311	not_sig
chr2_130202450_T_C_b38	450	256	38219	25597	1.17729	0.040634	1102	0.000852084	not_sig
chr8_119791414_C_T_b38	577	143	49113	14763	1.21288	0.0406787	1103	0.000852857	not_sig
chr5_170788634_T_C_b38	602	66	58971	4911	0.759598	0.0407828	1104	0.00085363	not_sig
chr3_45095595_T_G_b38	331	349	33607	30251	0.853714	0.0407884	1105	0.000854403	not_sig
chr10_62805174_C_G_b38	380	338	36243	27605	0.856309	0.0408067	1106	0.000855177	not_sig
chr1_160681128_AC_A_b38	687	33	61843	2013	0.677635	0.0408534	1107	0.00085595	not_sig
chr19_4326901_C_G_b38	659	61	59719	4179	0.755989	0.0408586	1108	0.000856723	not_sig
chr15_79463343_GGT_G_b38	592	84	54140	9750	1.2692	0.0408628	1109	0.000857496	not_sig
chr14_92161324_T_A_b38	371	287	38554	25308	0.848556	0.0410205	1110	0.00085827	not_sig
chr7_143960380_A_G_b38	640	80	58214	5670	0.779194	0.0410458	1111	0.000859043	not_sig
chr20_35627312_C_CA_b38	615	91	57201	6669	0.787936	0.0410523	1112	0.000859816	not_sig
chr16_2176242_C_G_b38	698	20	62823	1093	0.607193	0.0410751	1113	0.000860589	not_sig
chr12_6452437_CAG_C_b38	535	179	45629	18217	1.19326	0.0411373	1114	0.000861362	not_sig
chr19_54218406_A_G_b38	192	528	19311	44557	0.839032	0.0411721	1115	0.000862136	not_sig
chr19_35131588_C_T_b38	426	284	40711	23147	0.852853	0.0412329	1116	0.000862909	not_sig
chr17_31856838_T_C_b38	67	637	7708	56192	0.766775	0.041254	1117	0.000863682	not_sig
chr6_87088186_T_C_b38	700	8	62317	1463	2.05421	0.0412798	1118	0.000864455	not_sig
chr16_68355718_C_T_b38	718	2	63865	27	0.151773	0.0412889	1119	0.000865228	not_sig
chr9_87974101_A_G_b38	284	428	23094	40752	1.17091	0.0414897	1120	0.000866002	not_sig
chr3_36899250_G_T_b38	517	183	49302	14574	0.835129	0.0415652	1121	0.000866775	not_sig
chr1_1490110_T_C_b38	715	3	63794	66	0.246575	0.0417847	1122	0.000867548	not_sig
chr12_120091862_G_A_b38	634	86	57725	6139	0.784015	0.0418013	1123	0.000868321	not_sig
chr11_64792426_T_C_b38	462	210	46001	17619	0.84263	0.0418116	1124	0.000869095	not_sig
chr10_73799109_G_A_b38	216	504	16987	46895	1.18313	0.0418203	1125	0.000869868	not_sig
chr14_105380166_T_C_b38	657	3	63766	72	0.247279	0.0418933	1126	0.000870641	not_sig
chr16_669592_G_A_b38	552	104	55494	8372	0.800735	0.0418963	1127	0.000871414	not_sig
chr19_47066569_G_A_b38	711	9	63537	371	0.46129	0.0419558	1128	0.000872187	not_sig
chr19_49155167_G_A_b38	700	2	63878	28	0.153417	0.0419671	1129	0.000872961	not_sig
chr7_151062989_G_C_b38	503	217	46806	17042	0.843971	0.0419935	1130	0.000873734	not_sig
chr3_183508284_G_A_b38	714	4	63783	113	0.316236	0.0420068	1131	0.000874507	not_sig
chr17_75878603_G_C_b38	553	117	54449	9325	0.809465	0.0420402	1132	0.00087528	not_sig
chr11_46723375_G_C_b38	246	474	19528	44270	1.17654	0.0420676	1133	0.000876054	not_sig
chr7_90232518_G_A_b38	355	365	28987	34789	1.16728	0.042077	1134	0.000876827	not_sig
chr17_41462841_G_A_b38	284	436	22770	40888	1.16967	0.0421189	1135	0.0008776	not_sig
chr14_91416785_G_A_b38	547	149	48069	15803	1.20691	0.0421531	1136	0.000878373	not_sig
chr19_57908506_T_C_b38	458	260	38318	25540	1.17411	0.0422376	1137	0.000879146	not_sig
chr3_184344988_A_G_b38	443	253	42976	20882	0.850804	0.042351	1138	0.00087992	not_sig
chr17_18245220_C_T_b38	695	25	62483	1443	0.642021	0.0423715	1139	0.000880693	not_sig
chr19_3155738_T_C_b38	467	249	43944	19916	0.850002	0.0425412	1140	0.000881466	not_sig
chr19_5784359_C_T_b38	574	146	52794	11088	0.82571	0.0425738	1141	0.000882239	not_sig
chr9_34724789_G_A_b38	384	308	32087	30117	1.17021	0.0426234	1142	0.000883012	not_sig
chr11_64343196_G_A_b38	432	288	40657	23141	0.853764	0.0426569	1143	0.000883786	not_sig
chr16_57646992_C_T_b38	706	14	62496	680	0.548698	0.0426883	1144	0.000884559	not_sig
chr17_78121489_G_C_b38	556	164	51234	12566	0.831514	0.0427553	1145	0.000885332	not_sig
chr11_611802_C_G_b38	640	50	57513	6041	1.34448	0.0427916	1146	0.000886105	not_sig
chr3_42914347_AAAG_A_b38	710	10	63437	455	0.509245	0.0428055	1147	0.000886879	not_sig
chr19_39828587_C_T_b38	599	67	58829	5029	0.764262	0.0428203	1148	0.000887652	not_sig
chr9_127935750_G_C_b38	110	606	8164	55706	1.23857	0.0428633	1149	0.000888425	not_sig
chr16_31120293_A_G_b38	289	431	23283	40589	1.16893	0.042936	1150	0.000889198	not_sig
chr4_48342137_G_T_b38	465	237	44551	19285	0.849311	0.0429735	1151	0.000889971	not_sig
chr10_63185604_G_A_b38	156	542	12327	51571	1.20413	0.043027	1152	0.000890745	not_sig
chr19_17521012_G_A_b38	675	23	60724	3178	1.53592	0.0431342	1153	0.000891518	not_sig
chr20_62352293_C_T_b38	67	651	4658	59210	1.30825	0.0431792	1154	0.000892291	not_sig
chr18_41962442_GAT_G_b38	394	270	40302	23498	0.850818	0.0432384	1155	0.000893064	not_sig
chr5_177371305_G_A_b38	548	172	46421	17403	1.19443	0.0433046	1156	0.000893837	not_sig
chr6_43216394_A_C_b38	536	166	50769	13095	0.832844	0.0433302	1157	0.000894611	not_sig
chr8_18804694_C_A_b38	661	59	57174	6714	1.31563	0.0434147	1158	0.000895384	not_sig
chr11_66714162_G_A_b38	645	69	56160	7748	1.28965	0.0434756	1159	0.000896157	not_sig
chr7_93922116_C_T_b38	271	447	26497	37363	0.854883	0.0435105	1160	0.00089693	not_sig
chr11_64285685_T_G_b38	427	293	40173	23573	0.855147	0.0435111	1161	0.000897704	not_sig
chr11_111284052_C_T_b38	717	3	63831	67	0.250866	0.0435383	1162	0.000898477	not_sig
chr3_52535933_C_T_b38	710	10	62230	1664	1.89851	0.0435662	1163	0.00089925	not_sig
chr4_3445024_T_C_b38	380	332	36468	27350	0.858402	0.0436659	1164	0.000900023	not_sig
chr16_73898_A_T_b38	118	594	8863	55013	1.23305	0.0436781	1165	0.000900796	not_sig
chr19_9757602_T_C_b38	598	122	51153	12751	1.22184	0.0436919	1166	0.00090157	not_sig
chr19_52406050_C_T_b38	175	541	13616	50252	1.19384	0.0437051	1167	0.000902343	not_sig
chr9_137234192_G_A_b38	710	10	63391	457	0.511855	0.0437329	1168	0.000903116	not_sig
chr5_178964859_G_A_b38	518	202	43710	20160	1.18274	0.0437836	1169	0.000903889	not_sig
chr10_110118752_T_G_b38	519	135	52644	11204	0.818197	0.0438642	1170	0.000904662	not_sig
chr19_11337256_A_C_b38	718	2	63864	28	0.157397	0.0439187	1171	0.000905436	not_sig
chr2_178493938_A_G_b38	591	125	54483	9407	0.816333	0.0439207	1172	0.000906209	not_sig
chr6_159169702_T_C_b38	328	372	32229	31319	0.856825	0.043942	1173	0.000906982	not_sig
chr5_141423286_ACCT_A_b38	708	12	63268	574	0.535278	0.0439471	1174	0.000907755	not_sig
chr15_68312831_G_A_b38	308	394	25585	38293	1.17001	0.0440041	1175	0.000908529	not_sig
chr5_31422900_T_C_b38	522	168	50380	13524	0.834081	0.0440278	1176	0.000909302	not_sig
chr15_93009258_C_T_b38	687	29	60196	3708	1.45925	0.0440414	1177	0.000910075	not_sig
chr10_12250287_C_G_b38	314	346	27856	36006	1.17303	0.0441947	1178	0.000910848	not_sig
chr16_1436461_C_T_b38	645	75	55610	8266	1.27832	0.0441974	1179	0.000911621	not_sig
chr9_129084678_T_C_b38	288	402	24230	39624	1.17158	0.0442629	1180	0.000912395	not_sig
chr10_91813227_C_T_b38	529	143	52269	11613	0.821902	0.0442796	1181	0.000913168	not_sig
chr8_143158840_C_G_b38	385	333	36661	27223	0.858516	0.044316	1182	0.000913941	not_sig
chr1_16058683_G_A_b38	657	63	56971	4157	0.760941	0.0443633	1183	0.000914714	not_sig
chr11_43919901_T_C_b38	661	7	62509	1403	2.11943	0.0443865	1184	0.000915488	not_sig
chr12_120116998_C_T_b38	39	681	4738	59150	0.714952	0.0444709	1185	0.000916261	not_sig
chrX_135719120_C_T_b38	655	55	46906	2932	0.744413	0.0444814	1186	0.000917034	not_sig
chr16_47610_G_A_b38	387	295	38645	25195	0.855283	0.0446993	1187	0.000917807	not_sig
chr19_39487970_GTGTA_G_b38	308	400	30146	33558	0.857151	0.0448329	1188	0.00091858	not_sig
chr1_108937356_G_T_b38	485	215	46473	17411	0.845135	0.044872	1189	0.000919354	not_sig
chr7_100036110_G_A_b38	289	431	28021	35795	0.856563	0.0452831	1190	0.000920127	not_sig
chr17_48724646_C_G_b38	390	316	37696	26176	0.857009	0.0453988	1191	0.0009209	not_sig
chr11_802443_C_T_b38	692	16	63047	849	0.582411	0.0454225	1192	0.000921673	not_sig
chr15_67254963_C_A_b38	491	173	49330	14522	0.835508	0.0454733	1193	0.000922446	not_sig
chr9_120787749_G_A_b38	166	554	16849	47041	0.836567	0.0455008	1194	0.00092322	not_sig
chr6_39896954_C_T_b38	314	398	30597	33235	0.856966	0.0455247	1195	0.000923993	not_sig
chr5_141201647_C_A_b38	528	180	49638	14190	0.838551	0.0455805	1196	0.000924766	not_sig
chr9_136430228_C_T_b38	600	120	54938	8936	0.81328	0.0455829	1197	0.000925539	not_sig
chr16_30525597_C_G_b38	466	254	38979	24903	1.17212	0.0456065	1198	0.000926313	not_sig
chr17_63703971_T_TAGAACC_b38	457	261	42775	20869	0.854255	0.0456753	1199	0.000927086	not_sig
chr17_81511844_C_A_b38	541	179	49963	13887	0.840048	0.0457972	1200	0.000927859	not_sig
chr7_151071699_G_A_b38	372	348	35333	28451	0.860757	0.0458026	1201	0.000928632	not_sig
chr15_42730963_C_T_b38	713	7	63628	284	0.454634	0.0458423	1202	0.000929405	not_sig
chr22_50217680_A_C_b38	624	30	59703	4153	1.44687	0.0459485	1203	0.000930179	not_sig
chr14_104775891_T_C_b38	401	247	41924	21920	0.848839	0.0459857	1204	0.000930952	not_sig
chr9_21031480_C_T_b38	310	408	25165	38543	1.16372	0.0460131	1205	0.000931725	not_sig
chr15_81333044_C_T_b38	180	540	13960	49914	1.19183	0.0460458	1206	0.000932498	not_sig
chr1_197552747_T_C_b38	160	560	12287	51547	1.19864	0.0460525	1207	0.000933271	not_sig
chr16_1541111_G_T_b38	458	262	42898	20976	0.854771	0.046066	1208	0.000934045	not_sig
chr19_18124614_T_C_b38	24	692	3186	60712	0.660897	0.0461691	1209	0.000934818	not_sig
chr9_109013487_C_T_b38	585	101	56016	7772	0.803628	0.0461761	1210	0.000935591	not_sig
chr22_41217184_C_T_b38	467	209	46344	17512	0.844331	0.0462276	1211	0.000936364	not_sig
chr1_203348034_C_T_b38	135	585	10215	53665	1.21236	0.0463625	1212	0.000937138	not_sig
chr14_104938047_T_C_b38	306	414	29513	34339	0.859994	0.0464351	1213	0.000937911	not_sig
chr3_88150035_T_TC_b38	128	592	9614	54254	1.22016	0.0464496	1214	0.000938684	not_sig
chr14_39308472_G_C_b38	258	422	21838	41978	1.17521	0.0464669	1215	0.000939457	not_sig
chr22_31944894_C_CG_b38	456	262	38098	25592	1.16914	0.0464855	1216	0.00094023	not_sig
chr17_215819_G_T_b38	554	158	47594	16268	1.19849	0.0465182	1217	0.000941004	not_sig
chr16_67201769_C_T_b38	690	30	60125	3773	1.44331	0.0465335	1218	0.000941777	not_sig
chr7_899208_C_T_b38	718	2	63879	29	0.16298	0.0465883	1219	0.00094255	not_sig
chr17_28319037_C_G_b38	683	37	61562	2358	0.70705	0.0466065	1220	0.000943323	not_sig
chr6_127516212_A_G_b38	701	19	61163	2627	1.58466	0.0466763	1221	0.000944096	not_sig
chr9_35749848_G_C_b38	507	165	50261	13615	0.832359	0.0467215	1222	0.00094487	not_sig
chr8_23103191_G_C_b38	137	581	14176	49698	0.826665	0.046754	1223	0.000945643	not_sig
chr19_44108078_A_G_b38	144	576	10951	52923	1.20818	0.0467749	1224	0.000946416	not_sig
chr20_45377296_C_T_b38	606	114	55416	8474	0.81287	0.0467797	1225	0.000947189	not_sig
chr22_19962712_C_T_b38	374	346	30765	33093	1.16272	0.0468077	1226	0.000947963	not_sig
chr11_8683981_C_G_b38	663	57	57414	6494	1.31563	0.0468436	1227	0.000948736	not_sig
chr20_38601843_C_A_b38	205	509	16231	47619	1.1816	0.0468944	1228	0.000949509	not_sig
chr1_247491973_T_C_b38	504	216	37891	19133	1.17821	0.0469345	1229	0.000950282	not_sig
chr22_30538829_T_C_b38	205	513	16135	47745	1.18248	0.0469758	1230	0.000951055	not_sig
chrX_154412069_T_C_b38	159	561	12626	37219	0.835474	0.0469904	1231	0.000951829	not_sig
chr1_161215268_G_T_b38	499	207	47290	16578	0.845071	0.0470828	1232	0.000952602	not_sig
chr1_111423669_C_T_b38	491	219	46311	17553	0.849776	0.0471352	1233	0.000953375	not_sig
chr16_31753906_T_C_b38	625	41	61026	2860	0.71441	0.0474107	1234	0.000954148	not_sig
chr20_46689403_G_A_b38	631	65	59250	4660	0.763508	0.0475954	1235	0.000954922	not_sig
chr17_3624257_TGAAGAAAAG_T_b38	588	70	58488	5358	0.769512	0.0476472	1236	0.000955695	not_sig
chr11_129884773_T_C_b38	581	137	53487	10417	0.825943	0.0476751	1237	0.000956468	not_sig
chr9_990840_C_T_b38	537	183	49634	14242	0.842005	0.0477044	1238	0.000957241	not_sig
chr11_129884050_G_A_b38	581	137	53445	10411	0.826116	0.0477073	1239	0.000958014	not_sig
chr10_73235328_C_T_b38	664	56	60081	3811	0.752111	0.0477564	1240	0.000958788	not_sig
chr1_111426672_A_G_b38	396	324	37460	26374	0.860515	0.0478401	1241	0.000959561	not_sig
chr1_111449223_C_A_b38	396	324	37430	26370	0.861074	0.0479036	1242	0.000960334	not_sig
chr2_169637353_A_G_b38	545	173	46293	17521	1.19232	0.047932	1243	0.000961107	not_sig
chr11_66335575_C_T_b38	3	715	70	63838	3.82645	0.0479508	1244	0.00096188	not_sig
chr17_1830105_A_G_b38	184	536	14302	49552	1.18937	0.0479541	1245	0.000962654	not_sig
chr8_22566731_T_C_b38	607	113	51999	11861	1.22528	0.0480436	1246	0.000963427	not_sig
chr21_37087425_A_G_b38	551	117	54459	9395	0.812443	0.0480536	1247	0.0009642	not_sig
chr1_19326378_G_A_b38	698	22	60974	2942	1.53084	0.0483052	1248	0.000964973	not_sig
chr6_160531784_T_C_b38	698	18	62911	997	0.614542	0.0483082	1249	0.000965747	not_sig
chr7_98961257_G_C_b38	45	675	5308	58598	0.735971	0.0483127	1250	0.00096652	not_sig
chr16_28362840_G_C_b38	445	257	35228	23828	1.17119	0.0483296	1251	0.000967293	not_sig
chr17_50462402_C_A_b38	501	181	44541	19157	1.19049	0.0483393	1252	0.000968066	not_sig
chr4_947730_C_T_b38	590	130	54084	9810	0.823207	0.0483555	1253	0.000968839	not_sig
chr11_65618735_C_G_b38	498	222	41908	21940	1.1744	0.0484356	1254	0.000969613	not_sig
chr16_31219142_C_T_b38	204	516	20300	43542	0.847994	0.0485311	1255	0.000970386	not_sig
chr19_9757728_C_T_b38	598	122	51133	12741	1.22136	0.0485827	1256	0.000971159	not_sig
chr12_57105371_G_C_b38	712	2	63868	30	0.16722	0.0486266	1257	0.000971932	not_sig
chr19_17448267_T_C_b38	65	655	4505	59065	1.30109	0.0486298	1258	0.000972705	not_sig
chr19_44973247_T_G_b38	617	41	60937	2919	0.720866	0.0486892	1259	0.000973479	not_sig
chr1_976536_C_T_b38	582	138	53376	10480	0.828055	0.0487095	1260	0.000974252	not_sig
chr1_161711871_C_G_b38	534	166	50682	13188	0.837063	0.0487473	1261	0.000975025	not_sig
chr19_50514918_G_A_b38	623	97	56809	7085	0.801012	0.0488409	1262	0.000975798	not_sig
chr1_1669613_G_A_b38	546	154	47709	16163	1.20114	0.0489743	1263	0.000976572	not_sig
chr12_56086690_C_A_b38	671	31	59904	3988	1.44099	0.0490037	1264	0.000977345	not_sig
chr11_46890153_C_T_b38	131	589	9887	53997	1.21468	0.049005	1265	0.000978118	not_sig
chr16_70269677_G_A_b38	377	329	31682	32168	1.16347	0.0490138	1266	0.000978891	not_sig
chr9_137114298_G_C_b38	152	568	14380	44878	0.83516	0.0490298	1267	0.000979664	not_sig
chr5_177404118_A_G_b38	276	444	22210	41652	1.16577	0.0491615	1268	0.000980438	not_sig
chr20_45949891_G_A_b38	699	21	62714	1174	0.623105	0.0491724	1269	0.000981211	not_sig
chr12_123620004_A_G_b38	675	45	60956	2956	0.72741	0.0492208	1270	0.000981984	not_sig
chr3_88150029_T_C_b38	124	596	9302	54594	1.22108	0.0492829	1271	0.000982757	not_sig
chr9_120869767_A_G_b38	207	513	20554	43216	0.848401	0.0493044	1272	0.000983531	not_sig
chr1_1615365_A_C_b38	718	2	63880	30	0.168597	0.0493334	1273	0.000984304	not_sig
chr4_70606241_G_A_b38	718	2	63870	30	0.168624	0.049347	1274	0.000985077	not_sig
chr16_1202441_T_C_b38	510	182	44809	19017	1.18926	0.0493577	1275	0.00098585	not_sig
chr7_29884605_T_C_b38	319	389	31145	32699	0.860968	0.0493625	1276	0.000986623	not_sig
chr7_102478900_G_A_b38	718	2	63816	30	0.168766	0.0494206	1277	0.000987397	not_sig
chr17_69112221_C_G_b38	643	49	60444	3386	0.735104	0.0494685	1278	0.00098817	not_sig
chr3_180912777_T_C_b38	528	168	50422	13420	0.836483	0.0494866	1279	0.000988943	not_sig
chr5_135029306_G_T_b38	600	98	56508	7392	0.800898	0.0495136	1280	0.000989716	not_sig
chr5_157460125_A_G_b38	493	227	41441	22355	1.17156	0.0495392	1281	0.000990489	not_sig
chr16_4701044_C_T_b38	347	371	28491	35375	1.1613	0.0496068	1282	0.000991263	not_sig
chr14_59473009_T_C_b38	371	347	35363	28495	0.861517	0.0496297	1283	0.000992036	not_sig
chr5_142613933_G_T_b38	704	16	63051	857	0.598056	0.0497896	1284	0.000992809	not_sig
chr7_100160513_T_G_b38	294	426	28422	35440	0.860551	0.0498936	1285	0.000993582	not_sig
chr8_38105721_C_T_b38	704	16	63017	857	0.598378	0.0498942	1286	0.000994356	not_sig
chr22_42882142_C_T_b38	663	57	59996	3892	0.754552	0.0499043	1287	0.000995129	not_sig
chr19_39459124_C_T_b38	440	280	41223	22509	0.858047	0.0499392	1288	0.000995902	not_sig
chr11_30410673_A_T_b38	485	231	41000	22868	1.17105	0.0499905	1289	0.000996675	not_sig
chr7_149814421_G_A_b38	580	140	53213	10649	0.82907	0.0500497	1290	0.000997448	not_sig
chr3_56737223_A_C_b38	470	244	44249	19613	0.853785	0.0502228	1291	0.000998222	not_sig
chr17_1787458_G_A_b38	457	261	42888	20988	0.856862	0.0502967	1292	0.000998995	not_sig
chr22_19963748_G_A_b38	372	344	30796	33052	1.16061	0.0504808	1293	0.000999768	not_sig
chr5_122182614_G_A_b38	391	319	37514	26338	0.860549	0.0505828	1294	0.00100054	not_sig
chr11_124784030_G_C_b38	603	117	51601	12225	1.22102	0.0506241	1295	0.00100131	not_sig
chr2_131482936_C_A_b38	466	208	46364	17504	0.845822	0.0507596	1296	0.00100209	not_sig
chr15_66501339_G_C_b38	550	168	46842	17034	1.19051	0.0507719	1297	0.00100286	not_sig
chr17_31008404_G_C_b38	671	49	60591	3283	0.741975	0.0507803	1298	0.00100363	not_sig
chr17_1649542_G_A_b38	715	5	63698	174	0.390625	0.0509722	1299	0.00100441	not_sig
chr6_43007906_T_C_b38	639	81	58071	5825	0.791321	0.0510088	1300	0.00100518	not_sig
chr7_21543345_G_T_b38	391	327	32388	31386	1.15873	0.0510118	1301	0.00100595	not_sig
chr17_16422654_A_G_b38	458	262	38317	25545	1.16541	0.0510128	1302	0.00100673	not_sig
chr1_1358907_C_A_b38	62	658	4277	59595	1.31291	0.0510225	1303	0.0010075	not_sig
chr16_77742162_A_G_b38	351	313	31298	32534	1.16569	0.0510828	1304	0.00100827	not_sig
chr7_151064227_G_A_b38	530	190	48981	14857	0.846108	0.0511521	1305	0.00100905	not_sig
chr12_6463025_T_C_b38	391	329	32302	31556	1.161	0.0512249	1306	0.00100982	not_sig
chr9_133057735_C_T_b38	597	87	57221	6649	0.797363	0.051332	1307	0.00101059	not_sig
chr16_11020149_G_A_b38	490	230	45602	18274	0.853725	0.0513732	1308	0.00101137	not_sig
chr4_2933891_C_G_b38	637	49	60412	3462	0.744984	0.0514037	1309	0.00101214	not_sig
chr17_81833916_G_A_b38	517	145	51824	12042	0.828496	0.0514242	1310	0.00101291	not_sig
chr7_100153394_A_G_b38	269	447	26306	37542	0.85883	0.0514688	1311	0.00101369	not_sig
chr22_36929791_C_T_b38	641	35	61524	2368	0.704899	0.0514944	1312	0.00101446	not_sig
chr17_4959711_G_A_b38	675	45	60888	2994	0.737584	0.0515289	1313	0.00101523	not_sig
chr11_64341646_T_G_b38	432	288	40484	23228	0.860636	0.0516141	1314	0.00101601	not_sig
chr14_24301895_C_T_b38	526	162	50787	13093	0.837061	0.0516607	1315	0.00101678	not_sig
chr7_44871068_C_T_b38	87	631	5903	53677	1.25373	0.0516681	1316	0.00101755	not_sig
chr8_17373070_G_A_b38	551	161	51348	12532	0.835262	0.0516951	1317	0.00101833	not_sig
chr22_19039100_A_G_b38	452	232	39854	24008	1.17364	0.0517186	1318	0.0010191	not_sig
chr11_120305601_G_A_b38	451	267	42327	21501	0.858038	0.0517255	1319	0.00101987	not_sig
chr1_1327586_C_T_b38	62	658	4303	59611	1.30533	0.051748	1320	0.00102064	not_sig
chr1_24094796_G_A_b38	694	2	63884	32	0.173815	0.051816	1321	0.00102142	not_sig
chrX_72205385_C_T_b38	712	8	49350	1102	1.9874	0.0518449	1322	0.00102219	not_sig
chr17_44315254_T_C_b38	430	290	40415	23425	0.859424	0.051865	1323	0.00102296	not_sig
chr9_137437096_G_A_b38	621	99	56616	7288	0.807468	0.0518916	1324	0.00102374	not_sig
chr12_9160355_G_A_b38	581	135	53615	10285	0.825582	0.0519753	1325	0.00102451	not_sig
chr10_17229401_G_C_b38	469	249	43843	19965	0.857714	0.05222	1326	0.00102528	not_sig
chr14_31109556_C_T_b38	571	107	55472	8418	0.809818	0.0522425	1327	0.00102606	not_sig
chr11_118145353_C_T_b38	292	428	23635	40223	1.16107	0.0523517	1328	0.00102683	not_sig
chr16_28609990_T_C_b38	234	482	18614	44886	1.17068	0.0523677	1329	0.0010276	not_sig
chr13_113799443_T_C_b38	302	402	25087	38789	1.16156	0.052405	1330	0.00102838	not_sig
chr3_183162707_C_A_b38	508	164	50251	13609	0.838883	0.0524439	1331	0.00102915	not_sig
chr5_151316937_G_A_b38	426	294	40013	23783	0.861247	0.0526717	1332	0.00102992	not_sig
chr17_37628628_T_C_b38	544	172	50418	13408	0.841102	0.0527265	1333	0.0010307	not_sig
chr14_73729983_T_C_b38	415	281	40401	23469	0.857915	0.0527431	1334	0.00103147	not_sig
chr16_89971420_G_A_b38	187	533	18720	45176	0.846674	0.0528408	1335	0.00103224	not_sig
chrX_101625867_G_A_b38	562	122	42659	7585	0.819071	0.0529319	1336	0.00103302	not_sig
chr12_6453657_C_T_b38	528	188	44978	18890	1.17953	0.0529442	1337	0.00103379	not_sig
chr10_102402210_T_C_b38	274	440	22252	41604	1.1643	0.052971	1338	0.00103456	not_sig
chr14_49598999_G_C_b38	161	559	16333	47559	0.83865	0.0530068	1339	0.00103534	not_sig
chr4_1375305_C_G_b38	204	514	20313	43487	0.849674	0.0530165	1340	0.00103611	not_sig
chrX_154428737_G_A_b38	658	62	44925	5499	1.29906	0.053393	1341	0.00103688	not_sig
chr2_85322751_A_G_b38	422	298	39672	24152	0.862115	0.0533941	1342	0.00103766	not_sig
chr21_25603938_A_G_b38	197	509	15760	48114	1.18158	0.0534409	1343	0.00103843	not_sig
chr22_29731378_G_T_b38	656	44	58576	5298	1.34848	0.0534882	1344	0.0010392	not_sig
chr11_66332648_G_A_b38	716	4	63008	900	2.55682	0.053515	1345	0.00103998	not_sig
chr5_180621972_C_A_b38	654	62	51613	6355	1.2988	0.0535442	1346	0.00104075	not_sig
chr3_46612642_G_A_b38	137	583	10414	53506	1.20736	0.053805	1347	0.00104152	not_sig
chr16_2830613_T_C_b38	241	463	19706	44180	1.16698	0.0539704	1348	0.00104229	not_sig
chr19_56462409_C_CAG_b38	661	11	63356	550	0.521655	0.0539719	1349	0.00104307	not_sig
chr15_65077057_C_T_b38	418	302	39316	24478	0.861739	0.0539827	1350	0.00104384	not_sig
chr17_8081161_G_A_b38	641	19	62736	1152	0.619498	0.0540211	1351	0.00104461	not_sig
chr20_35617113_G_A_b38	557	123	54106	9796	0.819886	0.054023	1352	0.00104539	not_sig
chr20_62334004_A_G_b38	68	652	4776	59118	1.29097	0.054171	1353	0.00104616	not_sig
chr20_3046574_G_A_b38	535	185	49380	14460	0.846836	0.0543485	1354	0.00104693	not_sig
chr3_134486229_G_T_b38	209	509	20749	43051	0.851951	0.054386	1355	0.00104771	not_sig
chr1_230762748_C_T_b38	409	289	39738	24130	0.859363	0.0544298	1356	0.00104848	not_sig
chr1_228214807_C_T_b38	415	305	39084	24754	0.861776	0.0544497	1357	0.00104925	not_sig
chr20_62330822_A_G_b38	68	652	4784	59092	1.28825	0.0544501	1358	0.00105003	not_sig
chr3_194138131_C_T_b38	714	2	63878	32	0.178841	0.054465	1359	0.0010508	not_sig
chr19_18924679_C_T_b38	719	1	63914	4	0.044998	0.0544694	1360	0.00105157	not_sig
chr11_35685232_G_C_b38	572	138	53224	10662	0.830325	0.0545467	1361	0.00105235	not_sig
chr3_58424704_A_G_b38	357	359	34180	29694	0.863914	0.0546419	1362	0.00105312	not_sig
chr1_31619303_C_T_b38	299	421	28841	35025	0.862496	0.0547302	1363	0.00105389	not_sig
chr19_52951222_C_CACT_b38	413	307	38902	24930	0.862109	0.0547642	1364	0.00105467	not_sig
chr11_1226857_G_A_b38	717	3	63083	761	2.88317	0.0547937	1365	0.00105544	not_sig
chr2_27367171_G_C_b38	704	10	62270	1642	1.85638	0.0548328	1366	0.00105621	not_sig
chr12_7124640_T_A_b38	436	232	39212	24440	1.17133	0.0548559	1367	0.00105699	not_sig
chr19_35141112_C_T_b38	704	14	61779	2069	1.68409	0.0548718	1368	0.00105776	not_sig
chr20_46062711_T_G_b38	461	259	43061	20779	0.858898	0.0548997	1369	0.00105853	not_sig
chr22_23884333_G_C_b38	712	4	62982	924	2.61141	0.0549386	1370	0.00105931	not_sig
chr15_74180732_A_G_b38	587	133	50156	13674	1.20326	0.0549714	1371	0.00106008	not_sig
chr9_128636239_G_C_b38	718	2	63886	32	0.17982	0.0549865	1372	0.00106085	not_sig
chr11_5698526_C_T_b38	718	2	63874	32	0.179854	0.0550046	1373	0.00106163	not_sig
chr17_59960052_T_C_b38	669	39	61313	2585	0.723218	0.0550689	1374	0.0010624	not_sig
chr11_36289464_G_T_b38	331	357	33099	30749	0.861343	0.0550788	1375	0.00106317	not_sig
chr19_4333714_C_T_b38	303	417	29155	34685	0.864441	0.0550954	1376	0.00106394	not_sig
chr12_52675438_CACCTCCGGAGCCGTAGCTGCT_C_b38	340	350	33683	29863	0.861259	0.0551427	1377	0.00106472	not_sig
chr2_230172150_G_A_b38	598	64	56151	7761	1.29146	0.0551605	1378	0.00106549	not_sig
chr20_43189649_C_G_b38	93	625	9943	53797	0.805088	0.0552886	1379	0.00106626	not_sig
chr1_155135811_G_A_b38	395	317	37744	26142	0.863036	0.0553238	1380	0.00106704	not_sig
chr11_2922441_G_C_b38	554	166	50983	12853	0.841358	0.0554277	1381	0.00106781	not_sig
chr7_75494283_C_A_b38	379	325	36502	27050	0.864184	0.0554332	1382	0.00106858	not_sig
chr22_50255109_G_A_b38	195	525	19288	44168	0.850542	0.0554392	1383	0.00106936	not_sig
chr6_29943450_G_T_b38	713	7	24737	507	2.08762	0.0554767	1384	0.00107013	not_sig
chr11_77087958_T_C_b38	43	673	2851	61061	1.36842	0.0555382	1385	0.0010709	not_sig
chr6_34059161_C_T_b38	64	654	4471	59421	1.30058	0.0555771	1386	0.00107168	not_sig
chr8_124451009_T_C_b38	351	369	33458	30404	0.864394	0.0556199	1387	0.00107245	not_sig
chr3_179419485_A_G_b38	397	297	34162	29684	1.16148	0.0556683	1388	0.00107322	not_sig
chr3_36908471_G_T_b38	519	179	49487	14395	0.843402	0.055748	1389	0.001074	not_sig
chr7_98959339_C_T_b38	673	45	58592	5286	1.34925	0.0557731	1390	0.00107477	not_sig
chr2_85326957_G_A_b38	343	377	32720	31130	0.865603	0.0558892	1391	0.00107554	not_sig
chr18_706589_A_G_b38	286	414	28368	35400	0.862065	0.0558917	1392	0.00107632	not_sig
chr7_128501584_G_A_b38	387	333	31997	31851	1.15686	0.0558945	1393	0.00107709	not_sig
chr6_18147788_G_A_b38	336	332	29719	34159	1.16325	0.0560199	1394	0.00107786	not_sig
chr20_62320547_T_TG_b38	690	30	61681	1833	0.683501	0.0561138	1395	0.00107864	not_sig
chr2_32597890_G_A_b38	379	329	36489	27349	0.863421	0.0561982	1396	0.00107941	not_sig
chr1_205257160_T_C_b38	454	266	37974	25858	1.16221	0.0562058	1397	0.00108018	not_sig
chr14_92443356_C_T_b38	685	33	61829	2081	0.698645	0.0562638	1398	0.00108096	not_sig
chr2_235053566_T_C_b38	581	85	57217	6679	0.797891	0.0562711	1399	0.00108173	not_sig
chr11_17559452_C_T_b38	447	251	43030	20746	0.858612	0.056332	1400	0.0010825	not_sig
chr1_20164025_T_C_b38	269	449	26213	37663	0.860804	0.0563709	1401	0.00108328	not_sig
chr12_11171340_G_C_b38	269	449	26189	37675	0.861867	0.0564118	1402	0.00108405	not_sig
chr2_39779290_A_C_b38	362	340	34910	28344	0.864452	0.0564403	1403	0.00108482	not_sig
chr11_64343211_G_C_b38	432	288	40514	23280	0.861924	0.0564503	1404	0.00108559	not_sig
chr16_89171782_G_A_b38	320	400	26043	37679	1.15744	0.0566195	1405	0.00108637	not_sig
chr10_45000878_T_G_b38	601	47	60397	3513	0.743771	0.0566215	1406	0.00108714	not_sig
chr1_205842700_A_T_b38	606	110	55630	8240	0.816015	0.056625	1407	0.00108791	not_sig
chr16_67958069_C_T_b38	595	55	59686	4204	0.761982	0.05675	1408	0.00108869	not_sig
chr9_109167344_C_G_b38	489	183	48149	15239	0.845721	0.0567658	1409	0.00108946	not_sig
chr5_150375777_G_T_b38	651	69	59024	4884	0.780691	0.0568202	1410	0.00109023	not_sig
chr22_20712642_T_C_b38	421	287	34936	27606	1.15913	0.0570103	1411	0.00109101	not_sig
chr10_80275086_A_G_b38	242	476	23739	40087	0.858518	0.0570129	1412	0.00109178	not_sig
chr7_100374499_A_G_b38	514	144	51787	12053	0.830759	0.0570664	1413	0.00109255	not_sig
chr2_26477380_C_T_b38	668	50	58104	5782	1.32947	0.0571517	1414	0.00109333	not_sig
chrX_106840074_A_G_b38	706	2	50309	26	0.182433	0.0572803	1415	0.0010941	not_sig
chr11_83248562_A_G_b38	537	173	46255	17607	1.18156	0.0573854	1416	0.00109487	not_sig
chr2_85345910_G_A_b38	244	474	23945	39927	0.858348	0.0573878	1417	0.00109565	not_sig
chr12_56254127_G_C_b38	38	682	4537	59343	0.728786	0.0574244	1418	0.00109642	not_sig
chr1_154965759_G_C_b38	684	36	61572	2326	0.717761	0.0574514	1419	0.00109719	not_sig
chr1_206902535_G_GC_b38	385	291	33974	29812	1.16095	0.0575939	1420	0.00109797	not_sig
chr1_162854763_G_A_b38	601	119	51488	12382	1.21454	0.0576236	1421	0.00109874	not_sig
chr11_5608377_G_A_b38	514	182	49107	14743	0.84788	0.0577576	1422	0.00109951	not_sig
chr1_203186575_A_T_b38	609	111	55573	8275	0.816956	0.0577781	1423	0.00110029	not_sig
chr11_65616284_G_T_b38	498	222	41938	21820	1.16714	0.057917	1424	0.00110106	not_sig
chr16_66550091_G_C_b38	663	27	62180	1722	0.680036	0.0580196	1425	0.00110183	not_sig
chr3_141066333_C_A_b38	537	181	49665	14183	0.847254	0.0580314	1426	0.00110261	not_sig
chr15_40297629_G_A_b38	322	382	31542	32336	0.864151	0.0580383	1427	0.00110338	not_sig
chr22_19432783_C_G_b38	614	98	56595	7309	0.809137	0.05812	1428	0.00110415	not_sig
chr16_67146268_T_C_b38	629	65	59154	4738	0.775083	0.0581331	1429	0.00110493	not_sig
chr2_135876392_G_A_b38	522	128	53118	10774	0.827172	0.0581742	1430	0.0011057	not_sig
chr5_141184513_C_T_b38	539	181	49691	14155	0.848286	0.0582975	1431	0.00110647	not_sig
chr16_2210611_T_C_b38	225	465	18679	45193	1.1707	0.0583142	1432	0.00110725	not_sig
chr8_143576200_C_T_b38	582	112	55090	8676	0.818374	0.0584114	1433	0.00110802	not_sig
chr16_3356516_A_G_b38	496	224	41833	22031	1.16614	0.0584153	1434	0.00110879	not_sig
chr16_75114706_G_A_b38	206	514	16266	47596	1.17272	0.0584552	1435	0.00110956	not_sig
chr1_1228424_C_T_b38	594	126	54251	9525	0.8277	0.0584847	1436	0.00111034	not_sig
chr10_95693946_A_C_b38	622	44	60735	3153	0.733876	0.058487	1437	0.00111111	not_sig
chr12_123626387_G_T_b38	670	44	60981	2935	0.732885	0.0585456	1438	0.00111188	not_sig
chr12_8867893_A_G_b38	143	569	11084	52816	1.19755	0.058683	1439	0.00111266	not_sig
chr11_17431056_T_G_b38	539	121	53949	9945	0.821154	0.0588576	1440	0.00111343	not_sig
chr11_68025980_A_G_b38	547	143	48658	15206	1.1954	0.0590294	1441	0.0011142	not_sig
chr19_40608159_G_T_b38	586	122	51016	12864	1.21118	0.0591572	1442	0.00111498	not_sig
chr11_65869802_A_G_b38	347	371	28594	35274	1.15381	0.0591773	1443	0.00111575	not_sig
chr9_34381194_C_A_b38	525	195	48545	15335	0.85048	0.0592281	1444	0.00111652	not_sig
chr20_5863475_C_T_b38	463	227	44924	18868	0.856648	0.0592612	1445	0.0011173	not_sig
chr19_54239123_C_A_b38	506	208	46698	16410	0.854865	0.0592615	1446	0.00111807	not_sig
chr13_20866231_C_G_b38	398	314	33409	30431	1.15453	0.0592757	1447	0.00111884	not_sig
chr16_82170181_C_G_b38	366	346	30525	33293	1.15372	0.0593105	1448	0.00111962	not_sig
chr11_66265959_C_T_b38	615	105	52823	11039	1.22403	0.0593399	1449	0.00112039	not_sig
chr5_177390142_G_T_b38	512	208	43274	20570	1.17008	0.0593564	1450	0.00112116	not_sig
chr12_52676361_G_A_b38	351	363	33703	30167	0.865494	0.0594311	1451	0.00112194	not_sig
chr15_89804689_G_A_b38	588	66	58768	5118	0.775877	0.0595805	1452	0.00112271	not_sig
chr20_34996501_G_A_b38	683	37	61524	2384	0.715288	0.0596119	1453	0.00112348	not_sig
chr15_90974550_G_C_b38	460	258	43039	20773	0.860548	0.0597918	1454	0.00112426	not_sig
chr6_43220862_C_T_b38	705	15	61757	2135	1.62484	0.0598653	1455	0.00112503	not_sig
chr3_183092356_T_G_b38	258	460	20820	43044	1.15956	0.0599975	1456	0.0011258	not_sig
chr17_30971433_G_T_b38	707	13	63235	659	0.566766	0.0599992	1457	0.00112658	not_sig
chr6_24653148_G_A_b38	194	522	19388	44490	0.852826	0.0600627	1458	0.00112735	not_sig
chr1_1213065_G_A_b38	711	9	62404	1486	1.88119	0.0600836	1459	0.00112812	not_sig
chr9_2828742_C_A_b38	641	15	61536	2378	1.65139	0.0602638	1460	0.0011289	not_sig
chr10_95606607_C_T_b38	308	412	29576	34298	0.866928	0.0602646	1461	0.00112967	not_sig
chr5_176577679_A_C_b38	701	19	62817	1091	0.640784	0.060324	1462	0.00113044	not_sig
chr22_50255092_C_T_b38	212	508	20793	42615	0.855298	0.0604814	1463	0.00113121	not_sig
chr19_2425147_C_T_b38	717	3	63743	77	0.288706	0.0604931	1464	0.00113199	not_sig
chr22_50314905_G_A_b38	418	288	40003	23839	0.864927	0.0605286	1465	0.00113276	not_sig
chr2_85326661_C_T_b38	314	406	30099	33753	0.867289	0.0605448	1466	0.00113353	not_sig
chr16_89711816_G_C_b38	3	695	79	63335	3.46061	0.0605599	1467	0.00113431	not_sig
chr6_31719231_G_A_b38	531	175	49917	13943	0.847548	0.0605648	1468	0.00113508	not_sig
chr8_124450857_A_T_b38	354	366	33666	30208	0.867866	0.0605727	1469	0.00113585	not_sig
chr1_26255600_G_A_b38	478	242	44499	19353	0.859034	0.0607024	1470	0.00113663	not_sig
chr14_96385734_T_C_b38	353	319	35864	27990	0.863631	0.0607293	1471	0.0011374	not_sig
chr20_290494_G_GC_b38	266	450	25885	37753	0.862129	0.0607599	1472	0.00113817	not_sig
chr22_29727762_C_T_b38	687	13	61934	1970	1.68093	0.0607808	1473	0.00113895	not_sig
chr3_13340039_C_T_b38	698	22	62599	1289	0.653308	0.0608051	1474	0.00113972	not_sig
chr7_151009295_C_A_b38	145	561	13583	43965	0.836597	0.0608418	1475	0.00114049	not_sig
chr13_26051034_G_A_b38	489	159	50133	13701	0.840505	0.0608449	1476	0.00114127	not_sig
chr11_6563777_G_A_b38	343	377	32678	31192	0.868441	0.0609319	1477	0.00114204	not_sig
chr19_54219869_C_G_b38	600	114	55249	8607	0.819924	0.0609471	1478	0.00114281	not_sig
chr19_10457843_T_G_b38	456	264	38171	25581	1.15756	0.0610009	1479	0.00114359	not_sig
chr5_40841469_CTT_C_b38	709	11	62182	1702	1.7642	0.0610703	1480	0.00114436	not_sig
chr1_20115561_T_C_b38	272	442	26571	37271	0.863197	0.0613123	1481	0.00114513	not_sig
chr19_35524963_A_C_b38	292	408	28922	34910	0.863862	0.0613389	1482	0.00114591	not_sig
chr17_80198145_G_C_b38	419	291	39896	23938	0.863932	0.0613402	1483	0.00114668	not_sig
chr19_1093738_A_G_b38	672	48	58351	5517	1.32368	0.0613875	1484	0.00114745	not_sig
chrX_153783934_A_G_b38	456	264	33385	16690	0.863507	0.0614109	1485	0.00114823	not_sig
chr22_42065914_G_A_b38	505	159	50492	13358	0.840259	0.0614554	1486	0.001149	not_sig
chr1_31662310_C_T_b38	448	270	37577	26203	1.15703	0.0615831	1487	0.00114977	not_sig
chr20_277092_A_G_b38	286	434	23201	40647	1.15451	0.0615857	1488	0.00115055	not_sig
chr19_5591724_G_A_b38	607	107	55798	8058	0.819245	0.0616091	1489	0.00115132	not_sig
chr11_64340263_G_A_b38	457	263	42653	21215	0.864279	0.0616405	1490	0.00115209	not_sig
chr1_228283345_C_T_b38	453	265	42447	21415	0.862429	0.0617312	1491	0.00115286	not_sig
chrX_153774047_G_C_b38	126	592	10226	39912	0.830704	0.061834	1492	0.00115364	not_sig
chr16_31359847_G_A_b38	697	23	60904	3008	1.49671	0.061861	1493	0.00115441	not_sig
chr19_58437679_C_T_b38	544	170	46643	17229	1.18202	0.0619043	1494	0.00115518	not_sig
chr10_80427537_G_A_b38	560	102	55651	8229	0.811824	0.0619489	1495	0.00115596	not_sig
chr12_31085141_G_A_b38	388	306	36766	25054	0.864054	0.0619937	1496	0.00115673	not_sig
chr14_24136247_G_GC_b38	674	34	61666	2210	0.71044	0.0621132	1497	0.0011575	not_sig
chr19_17629306_G_A_b38	609	49	60267	3629	0.748391	0.0621205	1498	0.00115828	not_sig
chr16_57029763_C_A_b38	717	3	63826	78	0.292075	0.0621278	1499	0.00115905	not_sig
chr1_145846532_A_G_b38	479	241	40308	23534	1.16044	0.0622105	1500	0.00115982	not_sig
chr1_110346326_G_A_b38	600	62	59141	4735	0.774802	0.0622319	1501	0.0011606	not_sig
chr4_3489777_G_A_b38	651	31	61807	2047	0.695504	0.0622821	1502	0.00116137	not_sig
chr14_73737350_G_A_b38	600	62	59171	4739	0.775064	0.0622942	1503	0.00116214	not_sig
chr1_33567912_G_C_b38	500	160	50299	13567	0.842897	0.0623414	1504	0.00116292	not_sig
chr6_25600374_A_G_b38	695	25	62407	1503	0.669531	0.0623817	1505	0.00116369	not_sig
chr13_46343293_C_A_b38	611	81	54814	9064	1.24734	0.0624137	1506	0.00116446	not_sig
chr12_10409426_C_T_b38	202	512	20160	43692	0.855053	0.0624696	1507	0.00116524	not_sig
chr19_49359784_C_G_b38	493	193	47923	15941	0.849691	0.062503	1508	0.00116601	not_sig
chr16_67284727_T_G_b38	689	31	61926	1940	0.696284	0.0625142	1509	0.00116678	not_sig
chr6_32661393_C_G_b38	581	131	44125	8269	0.831138	0.062521	1510	0.00116756	not_sig
chr3_9834617_G_T_b38	53	667	6039	57843	0.76109	0.0625256	1511	0.00116833	not_sig
chr9_127467759_C_T_b38	710	2	63887	35	0.194484	0.0626533	1512	0.0011691	not_sig
chr7_5073179_C_G_b38	680	6	62705	1203	2.17431	0.062998	1513	0.00116988	not_sig
chr12_57718406_A_G_b38	375	339	35780	28074	0.867952	0.0632084	1514	0.00117065	not_sig
chr5_271742_CCCGGCCCTGGGG_C_b38	604	102	56136	7722	0.814564	0.063224	1515	0.00117142	not_sig
chr16_70251998_A_G_b38	373	331	31547	32323	1.15461	0.0632323	1516	0.0011722	not_sig
chr19_47021137_C_G_b38	694	2	63782	36	0.195855	0.0633151	1517	0.00117297	not_sig
chr19_47046196_C_T_b38	561	149	48516	15332	1.18985	0.0633354	1518	0.00117374	not_sig
chr12_65245835_ATTTT_A_b38	468	236	44472	19296	0.860428	0.0634989	1519	0.00117451	not_sig
chr19_55156590_C_T_b38	715	5	63730	186	0.417354	0.0635512	1520	0.00117529	not_sig
chr1_27353463_G_A_b38	472	248	39684	24170	1.15918	0.0635723	1521	0.00117606	not_sig
chr10_73913973_C_T_b38	336	382	27674	36190	1.15025	0.0636086	1522	0.00117683	not_sig
chr1_151775323_G_A_b38	210	490	21316	42556	0.855615	0.0636323	1523	0.00117761	not_sig
chr6_31980644_TCTC_T_b38	605	109	55587	8211	0.819883	0.0636534	1524	0.00117838	not_sig
chr19_52290008_G_A_b38	538	180	49740	14118	0.848354	0.0637299	1525	0.00117915	not_sig
chr11_3642244_CGGA_C_b38	595	73	58251	5631	0.787909	0.0638284	1526	0.00117993	not_sig
chr11_72008984_G_A_b38	695	25	62367	1515	0.675309	0.0638316	1527	0.0011807	not_sig
chr9_129147457_C_T_b38	591	63	59013	4871	0.774314	0.0638628	1528	0.00118147	not_sig
chr12_120993469_T_A_b38	560	150	48425	15435	1.18996	0.0638924	1529	0.00118225	not_sig
chr19_15794396_T_C_b38	571	149	52389	11505	0.841582	0.0640329	1530	0.00118302	not_sig
chr7_100039619_G_A_b38	290	430	27941	35915	0.866889	0.0641235	1531	0.00118379	not_sig
chr5_140677950_G_A_b38	610	68	58734	5110	0.780463	0.0641247	1532	0.00118457	not_sig
chr14_96239357_T_A_b38	189	531	18816	45048	0.852149	0.0641564	1533	0.00118534	not_sig
chr20_58700932_C_G_b38	653	13	63134	730	0.580804	0.0641867	1534	0.00118611	not_sig
chr16_30527098_G_A_b38	462	254	38965	24833	1.15921	0.0642088	1535	0.00118689	not_sig
chr4_3493719_C_T_b38	291	429	28015	35823	0.867375	0.0642401	1536	0.00118766	not_sig
chr11_73647878_C_T_b38	592	124	54393	9467	0.830939	0.0643728	1537	0.00118843	not_sig
chr6_42883658_G_A_b38	477	175	48725	15155	0.847782	0.0643858	1538	0.00118921	not_sig
chrX_23907717_A_T_b38	575	91	44517	5670	0.804792	0.0645023	1539	0.00118998	not_sig
chr3_48421843_T_C_b38	684	2	63857	37	0.198162	0.0645075	1540	0.00119075	not_sig
chr6_32202656_C_T_b38	306	348	32222	31636	0.863319	0.0646722	1541	0.00119153	not_sig
chr15_90255721_C_T_b38	514	206	47565	16321	0.85616	0.0646995	1542	0.0011923	not_sig
chr12_50086152_C_T_b38	715	5	63715	187	0.419697	0.06473	1543	0.00119307	not_sig
chr16_89696806_T_C_b38	417	303	39171	24699	0.867777	0.064758	1544	0.00119385	not_sig
chr1_23424647_G_T_b38	209	507	20724	43034	0.856005	0.0648014	1545	0.00119462	not_sig
chr22_50245867_T_C_b38	176	544	17600	46246	0.85011	0.0648448	1546	0.00119539	not_sig
chr14_23955158_G_A_b38	649	45	60323	3137	0.750004	0.0649578	1547	0.00119616	not_sig
chr19_41383843_T_C_b38	258	458	25172	38666	0.865298	0.0649724	1548	0.00119694	not_sig
chr5_73448294_C_G_b38	680	16	60880	2280	1.59166	0.0650623	1549	0.00119771	not_sig
chr2_69423598_G_A_b38	698	16	61626	2248	1.59136	0.0651685	1550	0.00119848	not_sig
chr3_50320438_A_C_b38	234	478	23158	40736	0.861123	0.0653142	1551	0.00119926	not_sig
chr3_48449988_A_G_b38	638	16	61414	2480	1.61022	0.065371	1552	0.00120003	not_sig
chr16_28495551_A_G_b38	444	266	37721	26147	1.15702	0.0653786	1553	0.0012008	not_sig
chr19_11354640_G_C_b38	357	361	33939	29861	0.870094	0.0653986	1554	0.00120158	not_sig
chrX_152767196_C_A_b38	584	134	42074	8049	0.833751	0.0653992	1555	0.00120235	not_sig
chr6_32443949_G_A_b38	122	586	12819	51079	0.829565	0.0654328	1556	0.00120312	not_sig
chr19_43996609_G_A_b38	9	711	428	63498	1.87797	0.0654412	1557	0.0012039	not_sig
chr2_95281337_A_G_b38	152	568	15382	48482	0.843457	0.0655041	1558	0.00120467	not_sig
chr16_3023239_G_T_b38	568	152	48463	15407	1.18799	0.0655577	1559	0.00120544	not_sig
chr2_85343150_G_A_b38	662	34	59602	4240	1.38511	0.0656134	1560	0.00120622	not_sig
chr5_176108588_G_A_b38	430	274	36658	27024	1.15691	0.0656245	1561	0.00120699	not_sig
chr1_2586971_C_T_b38	712	8	58296	1244	1.8992	0.0656562	1562	0.00120776	not_sig
chr22_19779528_G_T_b38	367	331	35817	28021	0.867426	0.0656595	1563	0.00120854	not_sig
chr14_20999754_T_G_b38	211	509	20817	43069	0.857652	0.0657349	1564	0.00120931	not_sig
chr6_145735545_C_T_b38	373	345	30916	32858	1.14907	0.0658252	1565	0.00121008	not_sig
chr17_37643330_G_A_b38	548	172	50470	13438	0.848308	0.0658711	1566	0.00121086	not_sig
chr19_58417685_G_A_b38	390	328	32461	31391	1.14983	0.065878	1567	0.00121163	not_sig
chr12_132773034_C_G_b38	111	571	8829	55083	1.21281	0.0658782	1568	0.0012124	not_sig
chr17_3577616_A_G_b38	670	46	60800	3104	0.743593	0.0659516	1569	0.00121318	not_sig
chr9_98060802_T_C_b38	336	382	32100	31764	0.870374	0.0659668	1570	0.00121395	not_sig
chr13_49630889_T_C_b38	370	350	30581	33251	1.14944	0.0660359	1571	0.00121472	not_sig
chr19_9339212_A_G_b38	666	42	61055	2837	0.736823	0.066053	1572	0.0012155	not_sig
chr1_111426685_G_C_b38	461	259	42987	20865	0.863938	0.0660774	1573	0.00121627	not_sig
chr2_9843557_G_T_b38	368	352	30366	33348	1.14812	0.066078	1574	0.00121704	not_sig
chr7_5193250_C_A_b38	34	686	4121	59799	0.719194	0.0660902	1575	0.00121781	not_sig
chr6_159035810_G_A_b38	670	50	60493	3407	0.754696	0.0661215	1576	0.00121859	not_sig
chr7_121261641_G_A_b38	409	291	39420	24340	0.867829	0.0661814	1577	0.00121936	not_sig
chr1_147908759_C_T_b38	682	38	61402	2500	0.730732	0.0662127	1578	0.00122013	not_sig
chr4_153710411_T_C_b38	586	132	50339	13549	1.19489	0.0662219	1579	0.00122091	not_sig
chr18_334742_C_T_b38	384	336	31817	32019	1.15011	0.0662413	1580	0.00122168	not_sig
chr6_31116298_G_C_b38	332	388	31666	32182	0.869613	0.0662436	1581	0.00122245	not_sig
chr20_43702817_A_G_b38	664	46	58484	5402	1.3333	0.0662606	1582	0.00122323	not_sig
chr6_31671071_C_T_b38	715	5	62888	990	2.25114	0.0662811	1583	0.001224	not_sig
chr22_50255125_A_G_b38	195	525	19220	44224	0.854634	0.0663079	1584	0.00122477	not_sig
chr22_50255868_A_G_b38	195	525	19334	44536	0.855588	0.0663191	1585	0.00122555	not_sig
chr1_44645152_T_C_b38	713	5	62896	994	2.25363	0.0663212	1586	0.00122632	not_sig
chr22_50254911_A_T_b38	195	525	19323	44545	0.856248	0.0663492	1587	0.00122709	not_sig
chr14_23079574_A_AGAACGT_b38	510	210	44738	15782	0.856715	0.066385	1588	0.00122787	not_sig
chr4_164968283_C_CA_b38	491	163	45649	17961	1.1852	0.0664904	1589	0.00122864	not_sig
chr2_173221944_G_A_b38	604	114	52004	11850	1.2073	0.0665002	1590	0.00122941	not_sig
chr19_3855479_T_C_b38	432	222	44348	19518	0.85643	0.0665856	1591	0.00123019	not_sig
chr2_85668215_T_G_b38	403	295	39026	24802	0.868192	0.0666983	1592	0.00123096	not_sig
chr11_65868248_C_T_b38	700	20	62749	1161	0.64758	0.0667488	1593	0.00123173	not_sig
chr12_138734_G_A_b38	523	197	48187	15531	0.855667	0.0668437	1594	0.00123251	not_sig
chr2_47783515_C_G_b38	530	146	50923	11763	0.838546	0.0668859	1595	0.00123328	not_sig
chr16_31130672_C_T_b38	435	285	40733	23141	0.867122	0.0668946	1596	0.00123405	not_sig
chr11_74749103_C_T_b38	706	14	61774	2004	1.63594	0.0668961	1597	0.00123483	not_sig
chrX_120542951_C_T_b38	657	13	49640	578	0.588462	0.0670077	1598	0.0012356	not_sig
chr11_65046213_G_C_b38	674	46	60790	3108	0.749119	0.0670281	1599	0.00123637	not_sig
chr16_67936027_A_G_b38	576	144	52769	11085	0.840266	0.0672177	1600	0.00123715	not_sig
chr9_21228003_A_AT_b38	682	38	61383	2511	0.734175	0.0672997	1601	0.00123792	not_sig
chr2_105337481_G_GC_b38	227	493	18108	45726	1.16271	0.0673768	1602	0.00123869	not_sig
chr3_50159665_G_C_b38	702	2	63881	37	0.2033	0.0674101	1603	0.00123946	not_sig
chr16_67660954_G_GGCGGC_b38	648	2	63596	40	0.203786	0.0674131	1604	0.00124024	not_sig
chrX_153775677_C_T_b38	560	118	40057	10199	1.20833	0.067414	1605	0.00124101	not_sig
chr1_15493546_C_T_b38	476	244	44281	19589	0.863002	0.0674432	1606	0.00124178	not_sig
chr2_74889400_G_A_b38	689	15	63064	844	0.614736	0.0676539	1607	0.00124256	not_sig
chr20_35286981_A_G_b38	717	3	63841	81	0.303238	0.0677005	1608	0.00124333	not_sig
chr1_228457824_G_A_b38	704	2	63865	37	0.20393	0.0677691	1609	0.0012441	not_sig
chr8_22581346_C_G_b38	613	107	52683	11191	1.21696	0.0677731	1610	0.00124488	not_sig
chr1_23362440_A_G_b38	169	551	16955	46937	0.849088	0.0677943	1611	0.00124565	not_sig
chr8_144510941_G_A_b38	708	12	62132	1782	1.69217	0.0678303	1612	0.00124642	not_sig
chr12_6445263_G_C_b38	575	145	49165	14707	1.18623	0.0679161	1613	0.0012472	not_sig
chr14_24304181_T_C_b38	543	165	50796	13102	0.848836	0.0681554	1614	0.00124797	not_sig
chr9_21816759_G_A_b38	378	312	37189	26643	0.867972	0.0681688	1615	0.00124874	not_sig
chr10_69451390_A_G_b38	491	191	47789	15873	0.853845	0.0681964	1616	0.00124952	not_sig
chr11_134223994_G_C_b38	575	87	56957	6933	0.804494	0.0684116	1617	0.00125029	not_sig
chr16_16090378_G_A_b38	692	28	60443	3475	1.42088	0.0685045	1618	0.00125106	not_sig
chr14_24377755_G_T_b38	544	156	51421	12463	0.845194	0.0685188	1619	0.00125184	not_sig
chr10_49988824_A_G_b38	508	204	42196	19770	1.16673	0.0686618	1620	0.00125261	not_sig
chr19_49594527_T_C_b38	562	158	47915	15887	1.17937	0.068691	1621	0.00125338	not_sig
chr20_2654366_T_G_b38	651	69	58884	4944	0.79216	0.0687189	1622	0.00125416	not_sig
chr19_45368778_C_T_b38	298	412	29024	34828	0.867941	0.068829	1623	0.00125493	not_sig
chr11_74164271_C_T_b38	436	226	44203	19673	0.858612	0.0688399	1624	0.0012557	not_sig
chr20_47684391_C_T_b38	487	231	45298	18514	0.861665	0.0688587	1625	0.00125648	not_sig
chr6_25600740_G_A_b38	362	348	34753	29071	0.870156	0.0689363	1626	0.00125725	not_sig
chr19_38907776_A_G_b38	473	247	39838	24036	1.15539	0.0690164	1627	0.00125802	not_sig
chr12_121444045_G_A_b38	425	295	39828	24018	0.868791	0.06904	1628	0.0012588	not_sig
chr19_7928074_T_C_b38	677	39	59260	4616	1.35216	0.0690457	1629	0.00125957	not_sig
chr20_38364525_G_C_b38	629	25	60377	3519	1.46642	0.0691297	1630	0.00126034	not_sig
chr16_21211620_C_A_b38	414	298	34924	28896	1.14947	0.069242	1631	0.00126111	not_sig
chr11_65896875_T_C_b38	376	340	35694	28118	0.87116	0.0692684	1632	0.00126189	not_sig
chr19_58556218_G_A_b38	707	3	63821	83	0.306487	0.0693292	1633	0.00126266	not_sig
chr1_172441827_G_A_b38	288	432	27743	36125	0.868087	0.0694803	1634	0.00126343	not_sig
chr7_6026830_T_C_b38	593	127	50846	13028	1.19639	0.0695309	1635	0.00126421	not_sig
chr5_147081304_C_T_b38	629	23	62359	1523	0.667919	0.06954	1636	0.00126498	not_sig
chr16_27749719_C_T_b38	650	70	58902	5006	0.78918	0.0695999	1637	0.00126575	not_sig
chr19_1230678_G_A_b38	560	160	47786	16088	1.17834	0.069706	1638	0.00126653	not_sig
chr19_8499404_C_T_b38	712	8	63484	356	0.499086	0.0698913	1639	0.0012673	not_sig
chr6_109441397_A_C_b38	665	55	60055	3837	0.772506	0.0699114	1640	0.00126807	not_sig
chr7_100870776_T_C_b38	322	388	31185	32679	0.869655	0.0699291	1641	0.00126885	not_sig
chr17_8044857_C_T_b38	376	320	36600	27054	0.868537	0.0699855	1642	0.00126962	not_sig
chr19_58061611_G_A_b38	87	633	9264	54624	0.810402	0.069998	1643	0.00127039	not_sig
chr22_21628971_A_G_b38	563	157	51646	12188	0.846261	0.0700652	1644	0.00127117	not_sig
chr11_104897273_A_G_b38	718	2	63847	37	0.208044	0.0701273	1645	0.00127194	not_sig
chr4_17647871_T_C_b38	279	375	24955	38745	1.15513	0.0701862	1646	0.00127271	not_sig
chr22_50249806_T_C_b38	191	521	19130	44732	0.857233	0.070289	1647	0.00127349	not_sig
chr22_37808082_C_T_b38	345	375	28429	35447	1.14711	0.0703064	1648	0.00127426	not_sig
chr1_31630664_A_G_b38	296	424	28413	35453	0.871087	0.0703679	1649	0.00127503	not_sig
chr16_25228484_G_C_b38	420	282	40330	23526	0.8688	0.0704871	1650	0.00127581	not_sig
chr15_45139608_G_T_b38	678	20	62678	1218	0.658767	0.0705175	1651	0.00127658	not_sig
chr12_55723916_C_G_b38	691	29	62086	1820	0.698486	0.0705484	1652	0.00127735	not_sig
chr2_29072810_G_A_b38	545	175	46393	17449	1.17132	0.0705609	1653	0.00127813	not_sig
chr16_375298_G_T_b38	419	301	34975	28887	1.14972	0.0706519	1654	0.0012789	not_sig
chr20_63244145_A_C_b38	234	424	24933	38937	0.861862	0.0707009	1655	0.00127967	not_sig
chr2_106194127_T_A_b38	671	47	60527	3197	0.754081	0.0707163	1656	0.00128045	not_sig
chr7_1500413_A_G_b38	384	318	37090	26742	0.870645	0.0707447	1657	0.00128122	not_sig
chr1_228212065_T_C_b38	304	416	24790	38998	1.1496	0.0707623	1658	0.00128199	not_sig
chr19_54817538_G_C_b38	492	184	42981	13707	0.852733	0.0707708	1659	0.00128277	not_sig
chr1_32247598_A_G_b38	667	39	61261	2641	0.737302	0.0707798	1660	0.00128354	not_sig
chr1_228214420_A_G_b38	304	416	24819	39019	1.14887	0.0708091	1661	0.00128431	not_sig
chr17_58250638_A_G_b38	480	216	41926	21930	1.16237	0.0708199	1662	0.00128508	not_sig
chr5_181003797_T_C_b38	509	209	43054	20580	1.16414	0.0708669	1663	0.00128586	not_sig
chr7_2221080_G_T_b38	239	461	23932	39916	0.864699	0.070947	1664	0.00128663	not_sig
chr1_228211781_C_G_b38	304	416	24814	38962	1.14743	0.0709559	1665	0.0012874	not_sig
chr19_18427932_A_C_b38	490	230	41322	22482	1.1591	0.0710091	1666	0.00128818	not_sig
chr16_1446612_T_C_b38	662	58	57382	6460	1.28495	0.0710157	1667	0.00128895	not_sig
chr14_74922371_G_A_b38	421	283	40292	23554	0.869644	0.0710276	1668	0.00128972	not_sig
chr7_149082526_G_A_b38	273	399	23752	40104	1.15525	0.0710436	1669	0.0012905	not_sig
chr17_36171888_T_C_b38	636	76	54438	5196	0.798749	0.0711147	1670	0.00129127	not_sig
chr18_46817728_A_C_b38	382	280	34564	29236	1.15398	0.071354	1671	0.00129204	not_sig
chr16_67648677_T_C_b38	669	51	60345	3527	0.766691	0.0713597	1672	0.00129282	not_sig
chr19_49036329_G_A_b38	677	43	60987	2895	0.747363	0.0713915	1673	0.00129359	not_sig
chr20_41357207_T_C_b38	571	149	52329	11523	0.843865	0.0714221	1674	0.00129436	not_sig
chr14_77279967_G_A_b38	612	108	55785	8101	0.822903	0.0714629	1675	0.00129514	not_sig
chr1_161726992_G_C_b38	377	341	31283	32481	1.14791	0.071522	1676	0.00129591	not_sig
chr16_31459219_T_C_b38	237	481	19099	44771	1.15502	0.0715232	1677	0.00129668	not_sig
chr15_41844779_C_A_b38	442	278	41277	22587	0.870017	0.071532	1678	0.00129746	not_sig
chr1_158328903_A_C_b38	647	13	63032	760	0.600086	0.0716755	1679	0.00129823	not_sig
chr15_30606922_G_A_b38	564	152	48254	15354	1.18066	0.0716841	1680	0.001299	not_sig
chr10_15103362_G_A_b38	597	123	54518	9366	0.833841	0.0717429	1681	0.00129978	not_sig
chr12_6453372_C_T_b38	550	170	50577	13289	0.850067	0.0717969	1682	0.00130055	not_sig
chr9_137228680_C_G_b38	499	221	46183	17667	0.863752	0.0718978	1683	0.00130132	not_sig
chr13_113669682_T_C_b38	377	343	31260	32620	1.14694	0.0719111	1684	0.0013021	not_sig
chr19_17862080_C_T_b38	707	13	63194	698	0.600697	0.0719404	1685	0.00130287	not_sig
chr7_100205189_G_C_b38	374	346	30999	32845	1.14529	0.0719535	1686	0.00130364	not_sig
chr12_53074635_T_G_b38	579	141	49574	14328	1.18684	0.072088	1687	0.00130442	not_sig
chr12_120224174_T_C_b38	142	566	14673	49191	0.841083	0.0720973	1688	0.00130519	not_sig
chr10_104214223_C_G_b38	579	141	49574	14312	1.18551	0.0721084	1689	0.00130596	not_sig
chr5_80654962_A_G_b38	145	535	15462	48166	0.844285	0.0721723	1690	0.00130673	not_sig
chr12_4604869_G_A_b38	656	64	56846	7064	1.27372	0.0723428	1691	0.00130751	not_sig
chr17_29566875_C_A_b38	640	54	57560	6286	1.29431	0.0723695	1692	0.00130828	not_sig
chr17_18264191_T_C_b38	259	461	20927	42931	1.15256	0.0724406	1693	0.00130905	not_sig
chr12_98649429_A_G_b38	537	161	50918	12972	0.849736	0.0724776	1694	0.00130983	not_sig
chrX_47565216_C_T_b38	525	163	39577	10413	0.847432	0.0725242	1695	0.0013106	not_sig
chr20_63737253_T_C_b38	182	538	14334	49524	1.16879	0.0725541	1696	0.00131137	not_sig
chr1_28237741_A_G_b38	484	236	40873	22999	1.154	0.0726016	1697	0.00131215	not_sig
chr3_157160600_C_G_b38	498	198	47643	16229	0.856755	0.0727072	1698	0.00131292	not_sig
chr3_47501899_G_A_b38	299	395	25327	38515	1.15112	0.0727321	1699	0.00131369	not_sig
chr15_52244399_C_T_b38	701	13	63182	706	0.60254	0.0727657	1700	0.00131447	not_sig
chr6_30690608_C_T_b38	713	7	62678	1224	1.98911	0.0728053	1701	0.00131524	not_sig
chrX_103587113_T_C_b38	481	239	31796	18236	1.15426	0.0728229	1702	0.00131601	not_sig
chr12_6815983_C_T_b38	436	284	40748	23092	0.870008	0.0728361	1703	0.00131679	not_sig
chr22_42079699_T_G_b38	505	215	42773	21123	1.15995	0.0729214	1704	0.00131756	not_sig
chr11_66025983_C_T_b38	496	224	45850	17880	0.863499	0.0729482	1705	0.00131833	not_sig
chr17_7327917_T_C_b38	542	110	54691	9191	0.828044	0.073077	1706	0.00131911	not_sig
chr19_51353350_C_T_b38	651	33	59122	4144	1.38273	0.0731476	1707	0.00131988	not_sig
chr17_27647232_T_C_b38	431	287	40438	23416	0.869598	0.0732476	1708	0.00132065	not_sig
chr12_49965105_G_A_b38	686	18	62850	1058	0.641552	0.0733069	1709	0.00132143	not_sig
chr7_150692589_G_C_b38	503	217	42577	21285	1.1588	0.0735354	1710	0.0013222	not_sig
chr16_15001818_C_A_b38	547	135	51154	10568	0.83708	0.0736214	1711	0.00132297	not_sig
chr8_143567480_C_A_b38	519	197	48094	15698	0.859913	0.0738735	1712	0.00132375	not_sig
chr1_20633892_A_T_b38	628	48	60308	3492	0.757561	0.0738878	1713	0.00132452	not_sig
chr7_102285204_C_G_b38	417	275	40605	23243	0.867993	0.0738948	1714	0.00132529	not_sig
chr10_12170187_T_A_b38	332	368	32500	31358	0.870473	0.0739598	1715	0.00132607	not_sig
chr12_10010780_C_T_b38	477	225	41264	22516	1.15679	0.0739888	1716	0.00132684	not_sig
chr16_14247189_A_G_b38	716	2	63292	586	3.31461	0.0740576	1717	0.00132761	not_sig
chr9_136199675_G_A_b38	699	21	62669	1227	0.651703	0.074135	1718	0.00132838	not_sig
chr1_114693436_G_A_b38	594	72	55412	8446	1.25748	0.0741675	1719	0.00132916	not_sig
chr22_42127941_G_A_b38	501	219	42233	21349	1.15643	0.074213	1720	0.00132993	not_sig
chr17_35170312_A_G_b38	342	360	33243	30521	0.872212	0.0742183	1721	0.0013307	not_sig
chr9_113370054_C_T_b38	594	124	51101	12777	1.19774	0.0743175	1722	0.00133148	not_sig
chr16_67930300_T_C_b38	577	143	52840	11040	0.843036	0.074398	1723	0.00133225	not_sig
chr8_144414270_T_C_b38	715	5	63641	195	0.438161	0.0744437	1724	0.00133302	not_sig
chr12_121641535_T_C_b38	393	327	36996	26882	0.873276	0.0744546	1725	0.0013338	not_sig
chr11_124897171_T_C_b38	513	187	48649	15199	0.857071	0.0744578	1726	0.00133457	not_sig
chr6_34836170_C_T_b38	454	266	42316	21556	0.869436	0.0745772	1727	0.00133534	not_sig
chr16_70138987_C_T_b38	598	118	51839	8505	0.831451	0.0746323	1728	0.00133612	not_sig
chr7_101222566_T_C_b38	492	228	45574	18266	0.864881	0.074664	1729	0.00133689	not_sig
chr12_32339035_C_T_b38	507	213	46914	16976	0.861314	0.0747804	1730	0.00133766	not_sig
chr17_6635035_G_A_b38	433	285	36338	27488	1.14928	0.0747963	1731	0.00133844	not_sig
chr16_89284503_G_C_b38	699	21	62658	1234	0.655536	0.0749094	1732	0.00133921	not_sig
chr7_100107204_A_G_b38	286	432	27597	36299	0.870793	0.0749184	1733	0.00133998	not_sig
chr15_41264197_G_A_b38	574	78	57552	6296	0.805048	0.0750042	1734	0.00134076	not_sig
chr1_94867308_C_T_b38	513	203	43781	20097	1.16002	0.0750241	1735	0.00134153	not_sig
chr12_57732451_C_A_b38	378	338	35862	27996	0.873045	0.0750779	1736	0.0013423	not_sig
chr22_19450821_G_A_b38	699	3	63795	87	0.317752	0.0752088	1737	0.00134308	not_sig
chr11_120327384_G_A_b38	472	248	39784	24086	1.15225	0.0752288	1738	0.00134385	not_sig
chr17_4987507_T_C_b38	680	36	61358	2388	0.735139	0.0752836	1739	0.00134462	not_sig
chr22_50571524_C_T_b38	357	353	34250	29590	0.873731	0.0753832	1740	0.0013454	not_sig
chr1_156876441_G_A_b38	576	136	49900	13974	1.18605	0.075398	1741	0.00134617	not_sig
chr17_50539297_G_A_b38	646	18	61298	2608	1.52694	0.0754955	1742	0.00134694	not_sig
chr1_978812_G_C_b38	13	657	2048	61844	0.597511	0.0755668	1743	0.00134772	not_sig
chr1_155061442_C_T_b38	573	127	50507	13333	1.19104	0.0756601	1744	0.00134849	not_sig
chr11_78100944_T_C_b38	86	598	9614	54278	0.811927	0.07567	1745	0.00134926	not_sig
chr17_40015939_G_A_b38	62	646	4480	59416	1.27287	0.0757266	1746	0.00135003	not_sig
chr6_89329951_G_C_b38	409	283	39863	23989	0.869719	0.0758107	1747	0.00135081	not_sig
chr3_190860777_A_G_b38	456	256	38767	25065	1.15168	0.0758126	1748	0.00135158	not_sig
chr8_143984818_A_G_b38	469	251	39443	24311	1.15168	0.0758484	1749	0.00135235	not_sig
chr19_44820881_G_A_b38	465	235	44416	19434	0.865781	0.0758584	1750	0.00135313	not_sig
chr17_4544941_C_T_b38	702	18	61410	2416	1.53434	0.0759454	1751	0.0013539	not_sig
chr10_49988768_A_AC_b38	564	148	46841	14545	1.18333	0.0759455	1752	0.00135467	not_sig
chr19_57477298_A_AGCC_b38	479	219	45771	18069	0.863446	0.0761198	1753	0.00135545	not_sig
chr3_58208324_C_A_b38	444	256	42583	21295	0.86733	0.0761331	1754	0.00135622	not_sig
chr12_57177466_C_T_b38	717	3	63169	749	2.83384	0.0761669	1755	0.00135699	not_sig
chr22_20992430_A_C_b38	238	456	24011	39819	0.86555	0.0761709	1756	0.00135777	not_sig
chr20_57958620_G_A_b38	570	98	55984	7896	0.820336	0.0763114	1757	0.00135854	not_sig
chr17_81665333_C_T_b38	668	44	60870	3030	0.755724	0.0763836	1758	0.00135931	not_sig
chr1_52899236_CAA_C_b38	676	30	61953	1937	0.704519	0.076413	1759	0.00136009	not_sig
chr17_47835306_C_T_b38	685	9	62392	1518	1.85179	0.0764713	1760	0.00136086	not_sig
chr2_230185999_A_G_b38	79	641	8467	55429	0.80682	0.0765298	1761	0.00136163	not_sig
chr16_67647267_C_T_b38	676	44	60906	2998	0.75625	0.076585	1762	0.00136241	not_sig
chr5_154002288_C_T_b38	678	42	59050	4860	1.32861	0.0766321	1763	0.00136318	not_sig
chr4_78776716_C_A_b38	663	33	61230	2206	0.723837	0.0767854	1764	0.00136395	not_sig
chr14_77026548_G_A_b38	351	369	28991	34879	1.14441	0.0768533	1765	0.00136473	not_sig
chr13_75760682_C_T_b38	367	353	34659	29139	0.874078	0.0770078	1766	0.0013655	not_sig
chr12_10997455_C_T_b38	565	155	51766	12084	0.850908	0.07702	1767	0.00136627	not_sig
chr11_27125747_T_C_b38	704	2	63864	40	0.220468	0.0770957	1768	0.00136705	not_sig
chr22_50301409_G_GCACA_b38	120	598	9138	54636	1.1998	0.0771194	1769	0.00136782	not_sig
chr6_166626975_A_G_b38	574	146	52442	11276	0.845347	0.0771208	1770	0.00136859	not_sig
chr5_67164562_G_A_b38	696	24	62437	1455	0.675801	0.0771752	1771	0.00136937	not_sig
chr1_169732760_T_C_b38	629	91	57123	6751	0.816895	0.0771859	1772	0.00137014	not_sig
chr15_90225727_A_C_b38	490	230	41403	22427	1.154	0.0772471	1773	0.00137091	not_sig
chr17_45121456_A_G_b38	330	356	32869	30895	0.871296	0.0772497	1774	0.00137168	not_sig
chr6_35457486_G_A_b38	665	49	60491	3387	0.759889	0.0773852	1775	0.00137246	not_sig
chr16_11915757_G_A_b38	53	665	3704	60130	1.29382	0.0774046	1776	0.00137323	not_sig
chr19_33800378_C_G_b38	358	290	37519	26341	0.866694	0.0776044	1777	0.001374	not_sig
chr16_10929351_T_C_b38	362	358	29990	33870	1.142	0.0776871	1778	0.00137478	not_sig
chr9_136013290_C_T_b38	379	323	36588	27252	0.87397	0.0777359	1779	0.00137555	not_sig
chr8_73092896_A_G_b38	499	219	46200	17554	0.865746	0.0778607	1780	0.00137632	not_sig
chr20_64072137_C_T_b38	534	154	47678	16188	1.17732	0.0778748	1781	0.0013771	not_sig
chr11_65965329_T_C_b38	352	368	33334	30516	0.875659	0.0779331	1782	0.00137787	not_sig
chr19_35125183_G_A_b38	557	163	47560	16332	1.17345	0.0779674	1783	0.00137864	not_sig
chr1_32366691_A_G_b38	687	33	61743	2157	0.727286	0.077998	1784	0.00137942	not_sig
chr19_10489742_G_A_b38	699	21	62625	1255	0.667043	0.0780141	1785	0.00138019	not_sig
chr2_219172944_A_G_b38	262	458	25297	38525	0.871183	0.0780249	1786	0.00138096	not_sig
chr22_21933592_T_C_b38	373	329	36084	27776	0.872706	0.0782602	1787	0.00138174	not_sig
chr11_65947454_C_T_b38	693	27	62206	1686	0.695656	0.0783586	1788	0.00138251	not_sig
chr19_843687_C_G_b38	693	27	62219	1687	0.695924	0.0784252	1789	0.00138328	not_sig
chr14_64773159_C_T_b38	644	74	55882	8010	1.24743	0.0784273	1790	0.00138406	not_sig
chr19_1049306_C_A_b38	599	121	54558	9204	0.835141	0.0784603	1791	0.00138483	not_sig
chr16_1509837_T_C_b38	512	206	47406	16452	0.862558	0.078591	1792	0.0013856	not_sig
chr19_57494168_A_G_b38	580	106	55499	8407	0.828854	0.0786197	1793	0.00138638	not_sig
chr15_88912537_C_G_b38	499	221	46146	17686	0.865374	0.0787086	1794	0.00138715	not_sig
chr9_136432582_A_G_b38	365	335	35419	28437	0.874773	0.0787851	1795	0.00138792	not_sig
chr19_48837601_C_T_b38	469	187	47479	16197	0.855587	0.0788657	1796	0.0013887	not_sig
chr6_38783112_A_G_b38	615	75	55491	8395	1.24054	0.078979	1797	0.00138947	not_sig
chr9_133779957_G_C_b38	482	220	41798	22070	1.15683	0.07901	1798	0.00139024	not_sig
chr7_108514607_C_T_b38	714	6	62813	1077	2.04039	0.0790592	1799	0.00139102	not_sig
chr3_14146210_T_C_b38	460	188	47173	16539	0.857859	0.0792428	1800	0.00139179	not_sig
chr12_30979544_A_C_b38	41	675	2773	61127	1.33895	0.0793018	1801	0.00139256	not_sig
chr1_205659180_G_A_b38	634	80	57972	5908	0.807647	0.0794273	1802	0.00139333	not_sig
chr4_177309998_C_A_b38	535	181	49481	14371	0.858467	0.0794604	1803	0.00139411	not_sig
chr2_130144976_C_T_b38	481	239	40366	23090	1.15121	0.079559	1804	0.00139488	not_sig
chr11_62611329_T_C_b38	481	239	40626	23234	1.15098	0.0795782	1805	0.00139565	not_sig
chr19_7932759_G_A_b38	677	39	59320	4568	1.33675	0.0796537	1806	0.00139643	not_sig
chr9_136496506_T_C_b38	718	2	63870	40	0.224832	0.0796953	1807	0.0013972	not_sig
chr9_34649450_T_C_b38	718	2	63860	40	0.224867	0.0797165	1808	0.00139797	not_sig
chr16_67831170_G_A_b38	675	45	60753	3071	0.758234	0.0797273	1809	0.00139875	not_sig
chr11_65625224_C_T_b38	488	220	42005	21849	1.15379	0.0797677	1810	0.00139952	not_sig
chr16_67807226_T_G_b38	575	139	52977	10841	0.846516	0.0798006	1811	0.00140029	not_sig
chr5_140807352_G_T_b38	434	286	39631	22801	0.873057	0.0798748	1812	0.00140107	not_sig
chr1_236538909_C_T_b38	287	429	23550	40264	1.1438	0.0799125	1813	0.00140184	not_sig
chr14_64227477_C_T_b38	318	362	27717	36167	1.14626	0.0800996	1814	0.00140261	not_sig
chr6_24357974_G_A_b38	575	75	57837	6057	0.802894	0.0801671	1815	0.00140339	not_sig
chr9_110430375_T_G_b38	576	140	52981	10877	0.844663	0.0802176	1816	0.00140416	not_sig
chr9_94318970_G_C_b38	700	12	62634	618	0.575566	0.0802222	1817	0.00140493	not_sig
chr5_10680885_G_A_b38	646	74	58511	5399	0.805521	0.0802227	1818	0.00140571	not_sig
chr6_42963523_C_G_b38	277	443	26659	37183	0.872121	0.0803824	1819	0.00140648	not_sig
chrX_149930131_A_AAGT_b38	632	50	47049	2842	0.763521	0.0803873	1820	0.00140725	not_sig
chr16_673647_C_G_b38	422	272	40896	22988	0.872095	0.0804048	1821	0.00140803	not_sig
chr5_151259878_A_G_b38	221	493	21776	42082	0.866291	0.0806246	1822	0.0014088	not_sig
chr3_184230978_T_C_b38	480	214	46070	17724	0.862921	0.0806792	1823	0.00140957	not_sig
chr9_34623721_G_A_b38	589	131	53782	10080	0.84269	0.0807005	1824	0.00141035	not_sig
chr1_85200473_T_G_b38	524	196	48315	15555	0.860723	0.0807573	1825	0.00141112	not_sig
chr7_99493976_C_T_b38	704	16	62996	910	0.635596	0.0807711	1826	0.00141189	not_sig
chr1_183186264_A_G_b38	587	131	53769	10119	0.843281	0.0807998	1827	0.00141267	not_sig
chr5_170378997_T_C_b38	465	231	44674	19212	0.865683	0.0809248	1828	0.00141344	not_sig
chr3_58422952_G_A_b38	430	290	40172	23704	0.874921	0.0810551	1829	0.00141421	not_sig
chr1_247896174_A_C_b38	161	559	12585	51307	1.17419	0.081266	1830	0.00141498	not_sig
chr17_47838029_T_C_b38	613	107	55719	8093	0.832114	0.0812665	1831	0.00141576	not_sig
chr22_23159099_T_G_b38	331	373	32137	31695	0.875195	0.0813053	1832	0.00141653	not_sig
chr1_116536107_A_G_b38	689	19	62791	1117	0.645092	0.0814455	1833	0.0014173	not_sig
chr10_48725929_T_C_b38	656	64	59319	4589	0.792954	0.0816118	1834	0.00141808	not_sig
chr8_142771546_C_G_b38	550	170	46897	16909	1.16651	0.0816654	1835	0.00141885	not_sig
chr1_246807155_A_C_b38	598	50	60043	3861	0.769075	0.0816811	1836	0.00141962	not_sig
chr10_94687805_T_A_b38	715	5	63713	201	0.451132	0.0817086	1837	0.0014204	not_sig
chr14_105168150_G_T_b38	669	27	61710	1760	0.706675	0.0817192	1838	0.00142117	not_sig
chr4_1244468_A_T_b38	472	248	39727	23953	1.14753	0.0817532	1839	0.00142194	not_sig
chr3_179323100_T_C_b38	616	98	53356	10268	1.20964	0.08191	1840	0.00142272	not_sig
chr17_42120388_G_C_b38	506	176	49213	14653	0.856021	0.0819581	1841	0.00142349	not_sig
chr2_230393503_A_T_b38	460	234	44332	19542	0.86655	0.0819736	1842	0.00142426	not_sig
chr17_39864166_T_C_b38	331	377	31996	31866	0.874417	0.0820803	1843	0.00142504	not_sig
chr19_991374_C_T_b38	607	101	54787	7537	0.826777	0.0821598	1844	0.00142581	not_sig
chr19_16893238_T_C_b38	496	224	42015	21873	1.15276	0.0821694	1845	0.00142658	not_sig
chr20_2664039_C_A_b38	650	70	58855	5047	0.796279	0.0821769	1846	0.00142736	not_sig
chr19_49022862_T_G_b38	283	407	23897	39431	1.14732	0.0823299	1847	0.00142813	not_sig
chr16_1448509_T_C_b38	661	59	57354	6516	1.27282	0.0823737	1848	0.0014289	not_sig
chr16_31038712_C_T_b38	393	269	39987	23789	0.869156	0.0824045	1849	0.00142968	not_sig
chr14_104604454_G_T_b38	186	534	14692	49100	1.16405	0.0825987	1850	0.00143045	not_sig
chr15_41943118_C_T_b38	580	100	52859	11037	1.21104	0.0826134	1851	0.00143122	not_sig
chr9_128121232_C_T_b38	2	716	41	63847	4.34984	0.0826466	1852	0.001432	not_sig
chr10_124042245_A_T_b38	541	173	46494	17368	1.16816	0.0827215	1853	0.00143277	not_sig
chr11_64757744_C_T_b38	88	630	6536	57352	1.22568	0.0828637	1854	0.00143354	not_sig
chr9_137108537_T_C_b38	159	561	15943	47947	0.852365	0.0829937	1855	0.00143432	not_sig
chr11_66558013_T_C_b38	649	65	56748	7160	1.25978	0.0830153	1856	0.00143509	not_sig
chr17_7329397_C_CG_b38	493	167	49533	14351	0.855299	0.0831024	1857	0.00143586	not_sig
chr5_177513273_C_T_b38	406	310	34126	29732	1.14105	0.0831761	1858	0.00143663	not_sig
chr9_76705724_C_T_b38	147	573	14795	49091	0.851235	0.0831836	1859	0.00143741	not_sig
chr16_66612688_C_T_b38	323	331	33754	30116	0.870656	0.0831944	1860	0.00143818	not_sig
chr11_47177087_C_T_b38	612	76	58064	5814	0.806317	0.0831955	1861	0.00143895	not_sig
chr12_6833849_C_T_b38	702	16	62983	921	0.641584	0.0832047	1862	0.00143973	not_sig
chr19_17011653_G_A_b38	707	3	63814	90	0.332372	0.0832227	1863	0.0014405	not_sig
chr2_11585821_T_C_b38	597	117	54923	8991	0.835299	0.0832738	1864	0.00144127	not_sig
chr7_90227294_C_T_b38	350	370	28930	34914	1.14161	0.0832984	1865	0.00144205	not_sig
chr1_111415071_A_G_b38	371	349	34977	28867	0.877339	0.0833232	1866	0.00144282	not_sig
chr19_1012000_A_G_b38	621	99	53444	10332	1.21267	0.0833256	1867	0.00144359	not_sig
chr2_95110016_G_A_b38	644	42	60898	2982	0.750829	0.0833479	1868	0.00144437	not_sig
chr16_3544316_C_T_b38	655	19	62706	1188	0.653123	0.0833539	1869	0.00144514	not_sig
chr1_31690310_G_T_b38	303	417	28941	34889	0.875955	0.0833539	1870	0.00144591	not_sig
chr2_29064842_C_T_b38	544	174	46490	17348	1.16665	0.0835106	1871	0.00144669	not_sig
chr19_52383892_TA_T_b38	418	302	39103	24749	0.876026	0.0835598	1872	0.00144746	not_sig
chr14_35292386_G_A_b38	678	38	61360	2552	0.742064	0.0835854	1873	0.00144823	not_sig
chr16_2429481_G_C_b38	677	3	63660	94	0.333218	0.0835901	1874	0.00144901	not_sig
chr2_185793329_G_A_b38	360	358	29750	33750	1.14079	0.0836259	1875	0.00144978	not_sig
chr2_206765180_G_A_b38	501	203	47326	16568	0.863996	0.0838076	1876	0.00145055	not_sig
chr15_74175515_G_A_b38	208	512	20395	43457	0.865624	0.0838393	1877	0.00145133	not_sig
chr17_50189930_G_C_b38	336	380	32030	31782	0.877364	0.0839065	1878	0.0014521	not_sig
chr7_45084687_A_G_b38	446	274	41440	22270	0.874752	0.0839355	1879	0.00145287	not_sig
chr2_43918235_G_T_b38	412	306	38692	25162	0.875588	0.0839829	1880	0.00145365	not_sig
chr5_65586109_A_G_b38	231	487	22523	41293	0.869627	0.0839943	1881	0.00145442	not_sig
chr2_70979137_G_A_b38	674	46	60738	3166	0.763752	0.0840167	1882	0.00145519	not_sig
chr8_144512433_C_T_b38	362	358	34187	29687	0.878073	0.0840273	1883	0.00145597	not_sig
chr7_95434956_C_T_b38	658	8	62473	1431	1.88401	0.0840568	1884	0.00145674	not_sig
chr17_82433808_A_G_b38	444	258	42412	21454	0.870528	0.0840642	1885	0.00145751	not_sig
chr20_21303598_T_C_b38	658	60	57252	6606	1.26538	0.0841136	1886	0.00145829	not_sig
chr10_71811862_C_G_b38	644	76	58224	5554	0.808307	0.0841337	1887	0.00145906	not_sig
chr12_116911209_C_G_b38	117	603	8917	54809	1.19262	0.0841617	1888	0.00145983	not_sig
chr12_10620384_A_G_b38	431	261	41789	22081	0.872556	0.0842283	1889	0.0014606	not_sig
chr6_146785705_A_G_b38	335	359	28675	35153	1.14396	0.0842333	1890	0.00146138	not_sig
chr4_1329485_G_C_b38	594	126	54195	9653	0.83969	0.0842698	1891	0.00146215	not_sig
chrX_153444780_A_G_b38	710	10	50006	395	0.560833	0.0842901	1892	0.00146292	not_sig
chr1_150268830_G_T_b38	593	61	56501	7369	1.26788	0.0844187	1893	0.0014637	not_sig
chr19_4101064_G_T_b38	398	322	33203	30611	1.13953	0.0845073	1894	0.00146447	not_sig
chr11_65779862_G_A_b38	466	254	43283	20571	0.871947	0.0846819	1895	0.00146524	not_sig
chr22_36141845_A_G_b38	564	154	51816	12078	0.853669	0.0847046	1896	0.00146602	not_sig
chr17_16422939_G_T_b38	257	453	21142	42736	1.14679	0.0847062	1897	0.00146679	not_sig
chr11_71527407_G_C_b38	573	127	53676	9996	0.840228	0.0847262	1898	0.00146756	not_sig
chr19_1011216_G_A_b38	555	165	50798	12928	0.856039	0.0847668	1899	0.00146834	not_sig
chr7_100768661_T_C_b38	488	200	43244	20546	1.15929	0.0847927	1900	0.00146911	not_sig
chr1_41510546_G_A_b38	678	42	61019	2857	0.755832	0.0848778	1901	0.00146988	not_sig
chr15_31101742_C_T_b38	280	424	27496	36374	0.873602	0.0849851	1902	0.00147066	not_sig
chr9_135499928_C_T_b38	338	354	33314	30524	0.874839	0.0851054	1903	0.00147143	not_sig
chr1_171107825_G_A_b38	437	273	37253	26597	1.14285	0.08512	1904	0.0014722	not_sig
chr8_144547957_TCTG_T_b38	679	41	59107	4711	1.31996	0.085212	1905	0.00147298	not_sig
chr1_232950710_T_C_b38	519	179	49243	14607	0.860064	0.0853418	1906	0.00147375	not_sig
chr11_62611188_G_A_b38	484	236	40906	22942	1.15021	0.0855666	1907	0.00147452	not_sig
chr19_42916253_A_G_b38	717	1	63777	7	0.0786961	0.0856627	1908	0.0014753	not_sig
chr14_103928437_T_C_b38	692	28	61672	1758	0.704497	0.0856725	1909	0.00147607	not_sig
chr8_63038753_A_G_b38	467	211	45927	17921	0.863632	0.0856936	1910	0.00147684	not_sig
chr11_94179870_A_G_b38	649	71	58722	5162	0.803533	0.0856957	1911	0.00147762	not_sig
chr22_50525724_T_C_b38	178	540	14112	49786	1.16291	0.0857175	1912	0.00147839	not_sig
chr2_71130634_A_G_b38	719	1	63909	7	0.0787526	0.0857209	1913	0.00147916	not_sig
chr22_20990303_A_C_b38	332	362	32670	31156	0.874625	0.0857445	1914	0.00147994	not_sig
chr2_148691616_G_A_b38	222	486	18143	45733	1.15143	0.0859159	1915	0.00148071	not_sig
chr2_94876688_C_G_b38	659	35	61532	2382	0.728883	0.0859617	1916	0.00148148	not_sig
chr7_34849940_T_C_b38	476	222	41507	22333	1.15366	0.0860639	1917	0.00148225	not_sig
chr14_24064997_G_A_b38	715	5	62909	949	2.1572	0.0860802	1918	0.00148303	not_sig
chr8_143810814_C_T_b38	715	5	62958	950	2.15779	0.0860915	1919	0.0014838	not_sig
chr9_35618056_C_A_b38	715	5	62959	951	2.16002	0.0861304	1920	0.00148457	not_sig
chr2_201289674_C_G_b38	659	61	57194	6700	1.26555	0.0861392	1921	0.00148535	not_sig
chr14_73996165_C_T_b38	635	51	60153	3745	0.775172	0.0861529	1922	0.00148612	not_sig
chr4_55582068_C_T_b38	424	268	41134	22712	0.873545	0.0862119	1923	0.00148689	not_sig
chr16_789993_A_G_b38	716	4	63685	145	0.407553	0.0862654	1924	0.00148767	not_sig
chr2_209653333_G_A_b38	699	5	62929	977	2.17046	0.0863403	1925	0.00148844	not_sig
chr19_51367941_G_A_b38	448	272	37693	26165	1.14332	0.0863472	1926	0.00148921	not_sig
chr5_172834520_A_T_b38	673	5	62572	1010	2.17263	0.0863515	1927	0.00148999	not_sig
chr9_93335465_C_T_b38	179	539	14183	49649	1.16254	0.08637	1928	0.00149076	not_sig
chr15_45164908_G_T_b38	449	245	43294	20580	0.87116	0.0864343	1929	0.00149153	not_sig
chr17_32931639_G_A_b38	650	28	62012	1892	0.708273	0.0865327	1930	0.00149231	not_sig
chr10_70255653_C_A_b38	540	180	45987	17837	1.16361	0.0866443	1931	0.00149308	not_sig
chr19_58396076_C_G_b38	399	321	37436	26414	0.877026	0.0868389	1932	0.00149385	not_sig
chr16_1474773_G_GGCGC_b38	664	56	57575	6185	1.27375	0.0868407	1933	0.00149463	not_sig
chr19_17226638_C_T_b38	623	97	56609	7267	0.824491	0.0869139	1934	0.0014954	not_sig
chr2_43809783_T_C_b38	548	148	51957	11931	0.85026	0.0870199	1935	0.00149617	not_sig
chr19_17226924_C_T_b38	623	97	56613	7273	0.825114	0.0870287	1936	0.00149695	not_sig
chr9_133402955_G_A_b38	459	261	42678	21194	0.873335	0.0870477	1937	0.00149772	not_sig
chr6_31116393_A_C_b38	573	147	52419	11435	0.850325	0.087167	1938	0.00149849	not_sig
chr15_88880518_G_A_b38	632	74	55811	8085	1.23722	0.0873803	1939	0.00149927	not_sig
chr19_32622389_G_A_b38	662	56	59928	3976	0.784308	0.087402	1940	0.00150004	not_sig
chr6_30562468_T_C_b38	201	509	20030	43858	0.864662	0.0874202	1941	0.00150081	not_sig
chr2_241768062_T_C_b38	536	114	54209	9619	0.834293	0.0875723	1942	0.00150159	not_sig
chr16_30992848_T_C_b38	516	200	44021	19729	1.15628	0.0876104	1943	0.00150236	not_sig
chr16_67991092_G_A_b38	600	120	54703	9197	0.84063	0.0876906	1944	0.00150313	not_sig
chr6_138323689_G_A_b38	716	4	63734	146	0.410048	0.0877013	1945	0.0015039	not_sig
chr15_101025913_C_T_b38	195	519	15641	48257	1.15921	0.0878578	1946	0.00150468	not_sig
chr16_4426088_T_C_b38	155	561	15623	48277	0.853777	0.0879329	1947	0.00150545	not_sig
chr14_77306256_G_A_b38	678	42	59046	4814	1.31612	0.0879346	1948	0.00150622	not_sig
chr5_138932127_A_G_b38	520	200	44223	19663	1.15605	0.0879999	1949	0.001507	not_sig
chr3_146071016_T_C_b38	328	376	31733	31885	0.876519	0.0880638	1950	0.00150777	not_sig
chr16_2111795_G_A_b38	632	84	57611	6263	0.817927	0.0881578	1951	0.00150854	not_sig
chr14_67204984_C_T_b38	656	56	59850	4020	0.786824	0.0881602	1952	0.00150932	not_sig
chr17_7817913_T_C_b38	511	209	47076	16694	0.867033	0.0882267	1953	0.00151009	not_sig
chr15_81323988_G_A_b38	673	47	60626	3256	0.769029	0.0882916	1954	0.00151086	not_sig
chr11_65794786_G_A_b38	492	186	48175	15687	0.861332	0.088416	1955	0.00151164	not_sig
chr21_43028653_G_C_b38	435	263	37733	26129	1.14534	0.0885012	1956	0.00151241	not_sig
chr5_141957660_A_G_b38	159	561	12450	51432	1.17084	0.0885498	1957	0.00151318	not_sig
chr15_90949647_C_T_b38	611	105	55886	7998	0.83278	0.0885971	1958	0.00151396	not_sig
chrX_48468392_C_T_b38	621	35	46918	1958	0.740452	0.0886681	1959	0.00151473	not_sig
chr19_1008684_G_A_b38	624	96	53839	10037	1.21177	0.0888128	1960	0.0015155	not_sig
chr19_49597038_A_G_b38	564	156	48210	15590	1.16913	0.0888179	1961	0.00151628	not_sig
chr20_23879541_A_G_b38	385	335	36161	27649	0.878729	0.0888204	1962	0.00151705	not_sig
chr5_141187690_G_T_b38	538	182	49421	14431	0.863169	0.0888835	1963	0.00151782	not_sig
chr19_51081601_C_T_b38	705	3	63811	93	0.342496	0.0889476	1964	0.0015186	not_sig
chr6_111592059_C_T_b38	616	62	59195	4709	0.790374	0.0889479	1965	0.00151937	not_sig
chr12_116750102_T_C_b38	597	121	54550	9308	0.841881	0.0889523	1966	0.00152014	not_sig
chr5_141187871_A_G_b38	538	182	49443	14443	0.863502	0.0889736	1967	0.00152092	not_sig
chr6_43215168_C_T_b38	705	15	61825	2079	1.58048	0.0890682	1968	0.00152169	not_sig
chr4_48341676_G_A_b38	493	227	45599	18263	0.869837	0.089104	1969	0.00152246	not_sig
chr12_95108527_G_A_b38	618	62	59194	4700	0.791438	0.0891965	1970	0.00152324	not_sig
chr16_84775218_C_G_b38	298	418	24545	39291	1.14122	0.0891979	1971	0.00152401	not_sig
chr9_100449043_C_T_b38	549	171	50389	13477	0.858685	0.0892936	1972	0.00152478	not_sig
chr17_81845225_A_G_b38	537	151	51548	12346	0.851749	0.0893334	1973	0.00152555	not_sig
chr15_64153759_C_G_b38	624	52	60000	3890	0.778	0.0893815	1974	0.00152633	not_sig
chr18_79968135_G_T_b38	139	577	10873	53037	1.17508	0.0894306	1975	0.0015271	not_sig
chr2_240596636_C_T_b38	615	105	53010	10882	1.20237	0.0896755	1976	0.00152787	not_sig
chr9_136508206_C_T_b38	718	2	63857	43	0.241743	0.0897162	1977	0.00152865	not_sig
chr14_77377020_A_G_b38	549	161	51075	12805	0.854905	0.0897283	1978	0.00152942	not_sig
chr5_149995316_CT_C_b38	269	451	21918	41930	1.14104	0.0898345	1979	0.00153019	not_sig
chr1_226894149_G_A_b38	289	397	28999	34869	0.875314	0.0898388	1980	0.00153097	not_sig
chr1_234427314_T_C_b38	483	229	41365	22495	1.147	0.0898832	1981	0.00153174	not_sig
chr11_124751345_C_A_b38	596	98	53270	10570	1.20674	0.0899115	1982	0.00153251	not_sig
chr15_65196790_C_T_b38	124	592	12705	51151	0.843295	0.0899123	1983	0.00153329	not_sig
chr3_183965336_G_A_b38	663	57	59869	4039	0.784712	0.0899208	1984	0.00153406	not_sig
chr2_24119662_G_A_b38	549	123	53725	10149	0.843168	0.0899243	1985	0.00153483	not_sig
chr9_127935764_A_G_b38	106	610	8084	55798	1.19941	0.0900272	1986	0.00153561	not_sig
chr19_54252161_C_A_b38	378	296	37883	25949	0.874735	0.0901033	1987	0.00153638	not_sig
chr6_73263223_G_T_b38	135	583	13667	50039	0.847814	0.0904842	1988	0.00153715	not_sig
chr1_1285621_A_G_b38	703	3	63814	94	0.34518	0.0904869	1989	0.00153793	not_sig
chr8_51372000_A_T_b38	697	17	62918	986	0.642519	0.09052	1990	0.0015387	not_sig
chr20_33660357_C_T_b38	527	189	45139	18705	1.15546	0.0905308	1991	0.00153947	not_sig
chr1_1327764_G_A_b38	57	663	4051	59859	1.27037	0.0905385	1992	0.00154025	not_sig
chr3_128945821_T_C_b38	700	10	63362	522	0.576686	0.0908879	1993	0.00154102	not_sig
chr11_130401783_T_G_b38	398	320	33364	30502	1.13706	0.0909616	1994	0.00154179	not_sig
chr3_52444898_C_T_b38	700	18	61543	2377	1.50202	0.0909999	1995	0.00154257	not_sig
chr1_228174981_G_A_b38	446	274	41465	22313	0.875912	0.0911235	1996	0.00154334	not_sig
chr7_66629021_C_T_b38	403	317	33609	30089	1.13815	0.0911434	1997	0.00154411	not_sig
chr11_65868088_G_A_b38	369	349	30770	33044	1.13544	0.0911836	1998	0.00154489	not_sig
[truncated: 10,935 more rows]

## Sheet: SupplTable3. Sig Variants
Supplemental Table 3. Significant Variants
variant_id	Ref Alleles SPARK	Alt Alleles SPARK	Ref Alleles GTEx	Alt Alleles GTEx	pvalue: GTEx vs SPARK	Ref Alleles gnomAD	Alt Alleles gnomAD	pvalue: gnomAD vs SPARK
chr11_207359_C_CGGCCACAGCCGCCTCAGACGT_b38	698	0	143	575	3.76444e-260	13136	50470	0
chr17_19015197_A_ACGGTACGGGGGTGGGGGC_b38	690	0	131	537	1.07214e-252	10384	48318	0
chr15_75358681_C_CCCACATGCTGCCCAGCCCATA_b38	696	6	174	542	1.06666e-224	16613	47003	0
chr11_67494811_C_CGA_b38	436	220	5	679	2.48374e-175	323	59657	0
chr9_87919241_T_TTCTTGTCTCCCAGCGTCA_b38	716	2	352	362	7.44204e-133	29718	32544	6.22819e-224
chr1_205065724_A_ATGGCCTGCTGCACTGGTCAGGGCCGGTGGTC_b38	703	1	382	334	8.15854e-120	31595	31637	2.60251e-208
chr20_49568145_G_GCGGGGCTGGCGGGGCTGA_b38	685	1	417	275	1.41086e-95	37443	25035	2.02838e-149
chr7_4861834_G_GCACGTCCCCCACCACCGCGACCTT_b38	699	1	443	275	8.17174e-94	39580	23754	9.38061e-140
chr11_71538079_A_AGGCTGTGGCTCCGGCTGTGGG_b38	714	6	408	256	9.46439e-86	36207	23917	1.20314e-144
chr6_30920003_C_CTGGGGCGGTGCAGGTGA_b38	641	63	324	394	8.62694e-83	29983	33669	3.03994e-135
chr5_6714741_T_TGGTCCTGGCCGGCGCCCGC_b38	666	0	485	187	3.99834e-63	44096	19496	1.09719e-105
chr1_155235878_G_T_b38	162	486	4	704	2.96232e-51	104	63158	1.41293e-257
chr6_3003476_C_T_b38	651	5	555	163	2.9368e-43	49554	13238	1.65842e-58
chr16_55832988_T_C_b38	654	0	594	116	1.26037e-35	50299	8861	3.1298e-46
chr1_152709204_C_CAGCTCTGGGGGCTGCTGT_b38	428	292	199	517	3.89178e-34	18218	45294	4.10605e-65
chr18_12254563_C_CCCGCGCACACACCCAT_b38	586	134	380	340	2.61067e-31	33709	29981	1.0351e-56
chr19_57859906_G_T_b38	607	109	701	15	3.03154e-20	62641	761	3.47194e-79
chr2_112542424_TTCCGGCGTGTACCGAGAGACTGGCG_T_b38	720	0	661	59	1.00513e-18	59005	4803	7.60846e-25
chr19_54336886_A_G_b38	630	86	688	12	1.08018e-15	59541	499	2.18604e-66
chr7_102554519_G_A_b38	562	144	623	45	6.88496e-14	48907	2819	1.09007e-41
chr12_10420495_C_G_b38	393	323	241	427	2.06495e-12	20750	40526	2.65412e-30
chr12_50352116_G_C_b38	720	0	650	36	3.72005e-12	55901	2985	1.64679e-16
chr6_31394993_C_T_b38	528	120	459	237	1.05441e-10	39725	15293	6.30736e-08
chr11_22193357_G_C_b38	234	450	138	582	1.77065e-10	11957	51853	1.64113e-21
chr19_12577507_AAATGTTCCTGGTGAGAGAAGCG_A_b38	637	69	563	153	1.48474e-09	50001	13755	1.68686e-16
chr17_7219921_T_TGGGCGTGCAGGACGC_b38	379	341	272	442	3.35169e-08	26259	37425	9.79689e-10
chr7_72942052_G_A_b38	720	0	664	22	1.16783e-07	55773	2083	8.08559e-12
chr20_1915454_C_T_b38	489	165	445	275	2.51618e-07	39318	24482	1.91478e-12
chr22_49923336_T_TCTGCACTCCGGGGC_b38	599	57	591	129	5.39497e-07	51742	12084	4.36241e-13
chr2_112501339_C_T_b38	470	182	421	277	5.43808e-06	39623	22597	6.39804e-06

## Sheet: SupplTable4. Sig eQTLs
Supplemental Table 4. Significant eQTLs
Variant ID	Gene ID	Gene Name	GTEx qval	log2aFC	Tissue	Relative Variant Position	Regulatory Region Overlap	Relative Gene Expression in Associated Tissue in ASD
chr17_7219921_T_TGGGCGTGCAGGACGC_b38	ENSG00000072778.19	ACADVL	4.40267e-19	-0.376584	Artery_Aorta	exon	['CBC Acetylation Peak']	lower
chr17_7219921_T_TGGGCGTGCAGGACGC_b38	ENSG00000072778.19	ACADVL	2.45705e-23	-0.292181	Artery_Tibial	exon	['CBC Acetylation Peak']	lower
chr17_7219921_T_TGGGCGTGCAGGACGC_b38	ENSG00000072778.19	ACADVL	2.16688e-27	-0.28785	Whole_Blood	exon	['CBC Acetylation Peak']	lower
chr17_7219921_T_TGGGCGTGCAGGACGC_b38	ENSG00000072778.19	ACADVL	3.40829e-06	-0.233672	Esophagus_Gastroesophageal_Junction	exon	['CBC Acetylation Peak']	lower
chr17_7219921_T_TGGGCGTGCAGGACGC_b38	ENSG00000072778.19	ACADVL	0.0263895	-0.196589	Colon_Sigmoid	exon	['CBC Acetylation Peak']	lower
chr17_7219921_T_TGGGCGTGCAGGACGC_b38	ENSG00000072778.19	ACADVL	1.00165e-09	-0.179101	Nerve_Tibial	exon	['CBC Acetylation Peak']	lower
chr17_7219921_T_TGGGCGTGCAGGACGC_b38	ENSG00000072778.19	ACADVL	5.79231e-11	-0.158957	Adipose_Subcutaneous	exon	['CBC Acetylation Peak']	lower
chr17_7219921_T_TGGGCGTGCAGGACGC_b38	ENSG00000072778.19	ACADVL	0.0212765	-0.115687	Adipose_Visceral_Omentum	exon	['CBC Acetylation Peak']	lower
chr17_7219921_T_TGGGCGTGCAGGACGC_b38	ENSG00000072778.19	ACADVL	0.000175748	-0.1058	Testis	exon	['CBC Acetylation Peak']	lower
chr20_1915454_C_T_b38	ENSG00000101307.15	SIRPB1	0.00782303	1.39401	Cells_EBV-transformed_lymphocytes	outside gene	['PsychENCODE Enhancer, PsychENCODE eQTL']	higher
chr20_1915454_C_T_b38	ENSG00000101307.15	SIRPB1	3.71028e-17	1.63296	Pituitary	outside gene	['PsychENCODE Enhancer, PsychENCODE eQTL']	higher
chr20_1915454_C_T_b38	ENSG00000101307.15	SIRPB1	9.355e-43	1.87792	Heart_Atrial_Appendage	outside gene	['PsychENCODE Enhancer, PsychENCODE eQTL']	higher
chr20_1915454_C_T_b38	ENSG00000101307.15	SIRPB1	5.11758e-70	2.5182	Breast_Mammary_Tissue	outside gene	['PsychENCODE Enhancer, PsychENCODE eQTL']	higher
chr20_1915454_C_T_b38	ENSG00000101307.15	SIRPB1	3.40478e-40	3.3816	Brain_Caudate_basal_ganglia	outside gene	['PsychENCODE Enhancer, PsychENCODE eQTL']	higher
chr20_1915454_C_T_b38	ENSG00000101307.15	SIRPB1	2.45362e-38	3.70988	Brain_Nucleus_accumbens_basal_ganglia	outside gene	['PsychENCODE Enhancer, PsychENCODE eQTL']	higher
chr20_1915454_C_T_b38	ENSG00000101307.15	SIRPB1	3.9403e-36	4.23337	Brain_Anterior_cingulate_cortex_BA24	outside gene	['PsychENCODE Enhancer, PsychENCODE eQTL']	higher
chr20_1915454_C_T_b38	ENSG00000101307.15	SIRPB1	1.63919e-52	4.32448	Brain_Cortex	outside gene	['PsychENCODE Enhancer, PsychENCODE eQTL']	higher
chr20_1915454_C_T_b38	ENSG00000101307.15	SIRPB1	2.12077e-129	5.07501	Cells_Cultured_fibroblasts	outside gene	['PsychENCODE Enhancer, PsychENCODE eQTL']	higher
chr7_102554519_G_A_b38	ENSG00000105819.13	PMPCB	0.0240949	-0.145214	Thyroid	outside gene	no overlaps	higher
chr12_50352116_G_C_b38	ENSG00000110881.11	ASIC1	0.0400239	0.526855	Heart_Left_Ventricle	outside gene	no overlaps	higher
chr2_112501339_C_T_b38	ENSG00000114999.7	TTL	2.45825e-14	-0.206745	Skin_Not_Sun_Exposed_Suprapubic	exon	no overlaps	lower
chr2_112501339_C_T_b38	ENSG00000114999.7	TTL	1.69041e-06	-0.118424	Esophagus_Gastroesophageal_Junction	exon	no overlaps	lower
chr20_49568145_G_GCGGGGCTGGCGGGGCTGA_b38	ENSG00000124212.5	PTGIS	0.0434488	0.208258	Nerve_Tibial	outside gene	no overlaps	higher
chr6_3003476_C_T_b38	ENSG00000124588.19	NQO2	0.022876	-0.611607	Kidney_Cortex	intron	no overlaps	lower
chr2_112542424_TTCCGGCGTGTACCGAGAGACTGGCG_T_b38	ENSG00000125630.15	POLR1B	0.00514375	0.271237	Cells_EBV-transformed_lymphocytes	exon	['PFC Acetylation Peak', 'TC Acetylation Peak', 'CBC Acetylation Peak']	higher
chr2_112542424_TTCCGGCGTGTACCGAGAGACTGGCG_T_b38	ENSG00000125630.15	POLR1B	2.4161e-10	0.549927	Brain_Putamen_basal_ganglia	exon	['PFC Acetylation Peak', 'TC Acetylation Peak', 'CBC Acetylation Peak']	higher
chr19_54336886_A_G_b38	ENSG00000129990.14	SYT5	0.00128646	0.491143	Brain_Caudate_basal_ganglia	outside gene	no overlaps	lower
chr19_54336886_A_G_b38	ENSG00000129990.14	SYT5	0.0281544	1.20765	Brain_Putamen_basal_ganglia	outside gene	no overlaps	lower
chr6_30920003_C_CTGGGGCGGTGCAGGTGA_b38	ENSG00000137411.16	VARS2	1.17893e-11	0.316158	Cells_EBV-transformed_lymphocytes	intron	no overlaps	higher
chr6_30920003_C_CTGGGGCGGTGCAGGTGA_b38	ENSG00000137411.16	VARS2	3.16196e-43	0.350274	Cells_Cultured_fibroblasts	intron	no overlaps	higher
chr6_30920003_C_CTGGGGCGGTGCAGGTGA_b38	ENSG00000137411.16	VARS2	1.61548e-38	0.458435	Colon_Transverse	intron	no overlaps	higher
chr6_30920003_C_CTGGGGCGGTGCAGGTGA_b38	ENSG00000137411.16	VARS2	4.88451e-29	0.459235	Spleen	intron	no overlaps	higher
chr6_30920003_C_CTGGGGCGGTGCAGGTGA_b38	ENSG00000137411.16	VARS2	3.36116e-92	0.488654	Skin_Sun_Exposed_Lower_leg	intron	no overlaps	higher
chr6_30920003_C_CTGGGGCGGTGCAGGTGA_b38	ENSG00000137411.16	VARS2	7.71788e-42	0.521735	Heart_Left_Ventricle	intron	no overlaps	higher
chr6_30920003_C_CTGGGGCGGTGCAGGTGA_b38	ENSG00000137411.16	VARS2	5.49467e-96	0.539333	Whole_Blood	intron	no overlaps	higher
chr15_75358681_C_CCCACATGCTGCCCAGCCCATA_b38	ENSG00000140400.16	MAN2C1	5.32451e-71	-0.849003	Spleen	exon	no overlaps	lower
chr15_75358681_C_CCCACATGCTGCCCAGCCCATA_b38	ENSG00000140400.16	MAN2C1	1.90147e-164	-0.806147	Whole_Blood	exon	no overlaps	lower
chr15_75358681_C_CCCACATGCTGCCCAGCCCATA_b38	ENSG00000140400.16	MAN2C1	3.99022e-33	-0.773784	Small_Intestine_Terminal_Ileum	exon	no overlaps	lower
chr15_75358681_C_CCCACATGCTGCCCAGCCCATA_b38	ENSG00000140400.16	MAN2C1	3.34465e-79	-0.722893	Esophagus_Gastroesophageal_Junction	exon	no overlaps	lower
chr15_75358681_C_CCCACATGCTGCCCAGCCCATA_b38	ENSG00000140400.16	MAN2C1	1.087e-128	-0.719392	Adipose_Visceral_Omentum	exon	no overlaps	lower
chr15_75358681_C_CCCACATGCTGCCCAGCCCATA_b38	ENSG00000140400.16	MAN2C1	1.50717e-73	-0.705542	Colon_Sigmoid	exon	no overlaps	lower
chr15_75358681_C_CCCACATGCTGCCCAGCCCATA_b38	ENSG00000140400.16	MAN2C1	3.35244e-138	-0.684586	Esophagus_Muscularis	exon	no overlaps	lower
chr15_75358681_C_CCCACATGCTGCCCAGCCCATA_b38	ENSG00000140400.16	MAN2C1	7.55207e-45	-0.680983	Prostate	exon	no overlaps	lower
chr15_75358681_C_CCCACATGCTGCCCAGCCCATA_b38	ENSG00000140400.16	MAN2C1	1.24314e-89	-0.642769	Colon_Transverse	exon	no overlaps	lower
chr15_75358681_C_CCCACATGCTGCCCAGCCCATA_b38	ENSG00000140400.16	MAN2C1	4.84153e-124	-0.638733	Lung	exon	no overlaps	lower
chr15_75358681_C_CCCACATGCTGCCCAGCCCATA_b38	ENSG00000140400.16	MAN2C1	7.72528e-21	-0.628856	Minor_Salivary_Gland	exon	no overlaps	lower
chr15_75358681_C_CCCACATGCTGCCCAGCCCATA_b38	ENSG00000140400.16	MAN2C1	1.69828e-67	-0.625242	Stomach	exon	no overlaps	lower
chr15_75358681_C_CCCACATGCTGCCCAGCCCATA_b38	ENSG00000140400.16	MAN2C1	7.367e-163	-0.624332	Thyroid	exon	no overlaps	lower
chr15_75358681_C_CCCACATGCTGCCCAGCCCATA_b38	ENSG00000140400.16	MAN2C1	4.73362e-05	-0.623324	Kidney_Cortex	exon	no overlaps	lower
chr15_75358681_C_CCCACATGCTGCCCAGCCCATA_b38	ENSG00000140400.16	MAN2C1	1.20135e-156	-0.609512	Nerve_Tibial	exon	no overlaps	lower
chr15_75358681_C_CCCACATGCTGCCCAGCCCATA_b38	ENSG00000140400.16	MAN2C1	1.20857e-156	-0.608171	Adipose_Subcutaneous	exon	no overlaps	lower
chr15_75358681_C_CCCACATGCTGCCCAGCCCATA_b38	ENSG00000140400.16	MAN2C1	8.68093e-13	-0.6045	Vagina	exon	no overlaps	lower
chr15_75358681_C_CCCACATGCTGCCCAGCCCATA_b38	ENSG00000140400.16	MAN2C1	3.13275e-96	-0.592455	Artery_Aorta	exon	no overlaps	lower
chr15_75358681_C_CCCACATGCTGCCCAGCCCATA_b38	ENSG00000140400.16	MAN2C1	7.56403e-69	-0.580548	Pancreas	exon	no overlaps	lower
chr15_75358681_C_CCCACATGCTGCCCAGCCCATA_b38	ENSG00000140400.16	MAN2C1	3.07551e-126	-0.540849	Artery_Tibial	exon	no overlaps	lower
chr15_75358681_C_CCCACATGCTGCCCAGCCCATA_b38	ENSG00000140400.16	MAN2C1	9.08324e-24	-0.524452	Adrenal_Gland	exon	no overlaps	lower
chr15_75358681_C_CCCACATGCTGCCCAGCCCATA_b38	ENSG00000140400.16	MAN2C1	3.54294e-110	-0.52364	Esophagus_Mucosa	exon	no overlaps	lower
chr15_75358681_C_CCCACATGCTGCCCAGCCCATA_b38	ENSG00000140400.16	MAN2C1	8.57551e-102	-0.50137	Skin_Not_Sun_Exposed_Suprapubic	exon	no overlaps	lower
chr15_75358681_C_CCCACATGCTGCCCAGCCCATA_b38	ENSG00000140400.16	MAN2C1	3.5121e-46	-0.49069	Pituitary	exon	no overlaps	lower
chr15_75358681_C_CCCACATGCTGCCCAGCCCATA_b38	ENSG00000140400.16	MAN2C1	1.21816e-52	-0.48441	Heart_Left_Ventricle	exon	no overlaps	lower
chr15_75358681_C_CCCACATGCTGCCCAGCCCATA_b38	ENSG00000140400.16	MAN2C1	1.4377e-84	-0.479644	Cells_Cultured_fibroblasts	exon	no overlaps	lower
chr15_75358681_C_CCCACATGCTGCCCAGCCCATA_b38	ENSG00000140400.16	MAN2C1	7.64155e-13	-0.474406	Brain_Spinal_cord_cervical_c-1	exon	no overlaps	lower
chr15_75358681_C_CCCACATGCTGCCCAGCCCATA_b38	ENSG00000140400.16	MAN2C1	2.23923e-110	-0.432744	Skin_Sun_Exposed_Lower_leg	exon	no overlaps	lower
chr15_75358681_C_CCCACATGCTGCCCAGCCCATA_b38	ENSG00000140400.16	MAN2C1	1.4718e-12	-0.388862	Cells_EBV-transformed_lymphocytes	exon	no overlaps	lower
chr15_75358681_C_CCCACATGCTGCCCAGCCCATA_b38	ENSG00000140400.16	MAN2C1	3.90382e-15	-0.37958	Brain_Putamen_basal_ganglia	exon	no overlaps	lower
chr15_75358681_C_CCCACATGCTGCCCAGCCCATA_b38	ENSG00000140400.16	MAN2C1	1.59055e-18	-0.340336	Brain_Hippocampus	exon	no overlaps	lower
chr15_75358681_C_CCCACATGCTGCCCAGCCCATA_b38	ENSG00000140400.16	MAN2C1	7.7285e-20	-0.288297	Brain_Cortex	exon	no overlaps	lower
chr15_75358681_C_CCCACATGCTGCCCAGCCCATA_b38	ENSG00000140400.16	MAN2C1	8.52745e-15	-0.285326	Brain_Caudate_basal_ganglia	exon	no overlaps	lower
chr15_75358681_C_CCCACATGCTGCCCAGCCCATA_b38	ENSG00000140400.16	MAN2C1	7.25394e-06	-0.269447	Brain_Anterior_cingulate_cortex_BA24	exon	no overlaps	lower
chr15_75358681_C_CCCACATGCTGCCCAGCCCATA_b38	ENSG00000140400.16	MAN2C1	3.35267e-30	-0.251925	Testis	exon	no overlaps	lower
chr15_75358681_C_CCCACATGCTGCCCAGCCCATA_b38	ENSG00000140400.16	MAN2C1	3.51882e-16	-0.165119	Muscle_Skeletal	exon	no overlaps	lower
chr17_19015197_A_ACGGTACGGGGGTGGGGGC_b38	ENSG00000154025.15	SLC5A10	0.000482683	0.471201	Testis	exon	no overlaps	higher
chr11_22193357_G_C_b38	ENSG00000171714.10	ANO5	2.22269e-13	-1.59345	Ovary	exon	['PFC Acetylation Peak', 'TC Acetylation Peak']	lower
chr11_22193357_G_C_b38	ENSG00000171714.10	ANO5	9.49852e-70	-1.05186	Artery_Tibial	exon	['PFC Acetylation Peak', 'TC Acetylation Peak']	lower
chr11_22193357_G_C_b38	ENSG00000171714.10	ANO5	8.17849e-43	-0.996544	Lung	exon	['PFC Acetylation Peak', 'TC Acetylation Peak']	lower
chr11_22193357_G_C_b38	ENSG00000171714.10	ANO5	5.68849e-38	-0.843727	Artery_Aorta	exon	['PFC Acetylation Peak', 'TC Acetylation Peak']	lower
chr11_67494811_C_CGA_b38	ENSG00000172508.10	CARNS1	3.96229e-15	-1.34178	Heart_Left_Ventricle	outside gene	ASD_DEG; lower in ASD brain	lower
chr18_12254563_C_CCCGCGCACACACCCAT_b38	ENSG00000176194.17	CIDEA	4.61735e-15	1.40844	Esophagus_Mucosa	exon	ASD DEG; lower in ASD brain	higher
chr1_155235878_G_T_b38	ENSG00000177628.15	GBA	7.95004e-10	-0.816517	Spleen	intron	no overlaps	lower
chr1_155235878_G_T_b38	ENSG00000177628.15	GBA	3.82352e-11	-0.567237	Thyroid	intron	no overlaps	lower
chr1_155235878_G_T_b38	ENSG00000177628.15	GBA	0.00544489	-0.486726	Lung	intron	no overlaps	lower
chr1_155235878_G_T_b38	ENSG00000177628.15	GBA	1.42379e-05	0.323084	Cells_Cultured_fibroblasts	intron	no overlaps	higher
chr11_207359_C_CGGCCACAGCCGCCTCAGACGT_b38	ENSG00000177951.17	BET1L	2.73508e-28	-0.20126	Skin_Sun_Exposed_Lower_leg	exon	no overlaps	lower
chr11_207359_C_CGGCCACAGCCGCCTCAGACGT_b38	ENSG00000177951.17	BET1L	1.39705e-18	-0.170678	Skin_Not_Sun_Exposed_Suprapubic	exon	no overlaps	lower
chr11_207359_C_CGGCCACAGCCGCCTCAGACGT_b38	ENSG00000177951.17	BET1L	5.96352e-06	-0.152229	Stomach	exon	no overlaps	lower
chr11_207359_C_CGGCCACAGCCGCCTCAGACGT_b38	ENSG00000177951.17	BET1L	1.59531e-06	-0.149089	Colon_Sigmoid	exon	no overlaps	lower
chr11_207359_C_CGGCCACAGCCGCCTCAGACGT_b38	ENSG00000177951.17	BET1L	7.25958e-08	-0.144336	Colon_Transverse	exon	no overlaps	lower
chr11_207359_C_CGGCCACAGCCGCCTCAGACGT_b38	ENSG00000177951.17	BET1L	2.30625e-14	-0.140268	Artery_Tibial	exon	no overlaps	lower
chr11_207359_C_CGGCCACAGCCGCCTCAGACGT_b38	ENSG00000177951.17	BET1L	1.1578e-15	0.272492	Pituitary	exon	no overlaps	higher
chr12_10420495_C_G_b38	ENSG00000183542.5	KLRC4	8.3821e-16	-1.00052	Adipose_Subcutaneous	outside gene	['PFC Acetylation Peak', 'TC Acetylation Peak']	lower
chr12_10420495_C_G_b38	ENSG00000183542.5	KLRC4	0.000166173	-0.967138	Esophagus_Gastroesophageal_Junction	outside gene	['PFC Acetylation Peak', 'TC Acetylation Peak']	lower
chr1_205065724_A_ATGGCCTGCTGCACTGGTCAGGGCCGGTGGTC_b38	ENSG00000184144.11	CNTN2	1.38782e-19	-0.569241	Skin_Sun_Exposed_Lower_leg	intron	no overlaps	lower
chr22_49923336_T_TCTGCACTCCGGGGC_b38	ENSG00000184164.14	CRELD2	2.01964e-06	0.641296	Liver	exon	no overlaps	higher
chr1_152709204_C_CAGCTCTGGGGGCTGCTGT_b38	ENSG00000187170.4	LCE4A	2.23768e-06	-0.469332	Skin_Sun_Exposed_Lower_leg	exon	no overlaps	lower
chr19_12577507_AAATGTTCCTGGTGAGAGAAGCG_A_b38	ENSG00000188033.9	ZNF490	2.60145e-07	0.178851	Adipose_Subcutaneous	exon	no overlaps	higher
chr19_12577507_AAATGTTCCTGGTGAGAGAAGCG_A_b38	ENSG00000188033.9	ZNF490	0.000140513	0.197742	Esophagus_Muscularis	exon	no overlaps	higher
chr19_12577507_AAATGTTCCTGGTGAGAGAAGCG_A_b38	ENSG00000188033.9	ZNF490	0.000788747	0.208976	Breast_Mammary_Tissue	exon	no overlaps	higher
chr19_12577507_AAATGTTCCTGGTGAGAGAAGCG_A_b38	ENSG00000188033.9	ZNF490	0.0380918	0.210181	Esophagus_Gastroesophageal_Junction	exon	no overlaps	higher
chr19_12577507_AAATGTTCCTGGTGAGAGAAGCG_A_b38	ENSG00000188033.9	ZNF490	0.000231139	0.21412	Whole_Blood	exon	no overlaps	higher
chr19_12577507_AAATGTTCCTGGTGAGAGAAGCG_A_b38	ENSG00000188033.9	ZNF490	0.0272935	0.251977	Artery_Aorta	exon	no overlaps	higher
chr19_12577507_AAATGTTCCTGGTGAGAGAAGCG_A_b38	ENSG00000188033.9	ZNF490	1.75712e-20	0.286015	Nerve_Tibial	exon	no overlaps	higher
chr19_12577507_AAATGTTCCTGGTGAGAGAAGCG_A_b38	ENSG00000188033.9	ZNF490	5.7205e-12	0.301441	Artery_Tibial	exon	no overlaps	higher
chr16_55832988_T_C_b38	ENSG00000198848.12	CES1	1.38304e-08	0.652735	Skin_Not_Sun_Exposed_Suprapubic	intron	no overlaps	higher
chr16_55832988_T_C_b38	ENSG00000198848.12	CES1	3.9463e-15	0.707384	Nerve_Tibial	intron	no overlaps	higher
chr16_55832988_T_C_b38	ENSG00000198848.12	CES1	1.09628e-10	0.811418	Heart_Atrial_Appendage	intron	no overlaps	higher
[truncated: 69 more rows]

## Sheet: SupplTable5. eQTLs by tissue
Supplemental Table 5. eQTL summary by tissue.
[truncated: 51 more rows]

## Sheet: SupplTable6. InterSPARK results
Supplemental Table 6. SPARK ASD-Affected vs SPARK ASD-Unaffected Experimental Results
[truncated: 12,684 more rows]
